# Supplementary material for: Generation of functional hepatocytes by forward programming with nuclear receptors
Source: eLife. 2022 Aug 12;11:e71591. doi: 10.7554/eLife.71591 (PMC9374437; doi:10.7554/eLife.71591)
Supplement: Figure 1—source data 1. [file elife-71591-fig1-data1.xlsx]

## Sheet: Sheet1
Figure 1B. mRNA fold induction levels of the 4 LETFs in targeted hESCs over the average of the levels in the untargeted
HNF1A	Untarg	Targ
	0.2	7856.82
	0.31	663.4
	2.49	2401.25
HNF6	Untarg	Targ
	0.32	1464.69
	0.52	156.77
	2.15	488.39
FOXA3	Untarg	Targ
	0.95	200.58
	0.97	25.94
	1.08	56.88
HNF4A	Untarg	Targ
	0.53	42412.4
	0.27	4998.75
	2.2	12896.7
Figure 1E. mRNA levels in hESCs targeted with the 4 LETFs								Statistical tests
ALB	Day 10		Day 15		Controls			Unpaired t test (Untarg vs Targ):	(Day 10)	(Day 15)
	Untarg	Targ	Untarg	Targ	HLCs	PHHs		P value	0.1041	0.0368
	0.0031	0.0357	0.0038	0.2941	121.895	256.595		P value summary	ns	*
	0.0016	0.051	0.0058	0.1012	128.444	262.153		Significantly different (P < 0.05)?	No	Yes
	0.0031	0.024	0.0049	0.9172	70.5443	227.761		One- or two-tailed P value?	Two-tailed	Two-tailed
	0.0043	0.1816	0.0063	0.7547	67.1498	145.623		t, df	t=1.914, df=6	t=2.674, df=6
SERPINA1	Day 10		Day 15		Controls			Unpaired t test (Untarg vs Targ):	(Day 10)	(Day 15)
	Untarg	Targ	Untarg	Targ	HLCs	PHHs		P value	0.0052	0.0046
	0.0169	64.961	0.01695	65.1639	277.722	95.0983		P value summary	**	**
	0.0298	57.789	0.05892	32.4692	435.039	124.772		Significantly different (P < 0.05)?	Yes	Yes
	0.2131	49.835	0.02997	107.537	153.87	90.7025		One- or two-tailed P value?	Two-tailed	Two-tailed
	0.2138	126.23	0.07486	100.767	185.505	28.6593		t, df	t=4.274, df=6	t=4.401, df=6
AFP	Day 10		Day 15		Controls			Unpaired t test (Untarg vs Targ):	(Day 10)	(Day 15)
	Untarg	Targ	Untarg	Targ	HLCs	PHHs		P value	0.028	0.0498
	0.0014	25.965	0.0015	49.453	251.254	0.004		P value summary	*	*
	0.0015	45.571	0.003	5.1213	156.498	0.0036		Significantly different (P < 0.05)?	Yes	Yes
	0.0022	47.882	0.0023	77.93	54.6834	0.005		One- or two-tailed P value?	Two-tailed	Two-tailed
	0.002	120.8	0.0025	23.098	33.8221	0.0014		t, df	t=2.882, df=6	t=2.450, df=6
Figure 1F. CYP3A4 activity levels in hESCs targeted with the 4 LETFs and HLCs
CYP3A4	Day 15		Controls					Unpaired t test (Untarg vs Targ):
RLU/ml/million	Untarg	Targ	HLCs	PHHs				P value	0.0198
	177	41413	31007.8	31858954				P value summary	*
	202	6453	19709.3	26392379				Significantly different (P < 0.05)?	Yes
	379	36337	125751	3813647				One- or two-tailed P value?	Two-tailed
	202	98977	108692	5129301				t, df	t=2.902, df=8
	202	36826	279307
			47814.9
Figure 1G. mRNA expression levels of ALB in hESCs targeted with the 4 LETFs and combinations of 3 factors								Statistical tests
								One-way ANOVA multiple corrections:
Day 10	4 LETFs	no HNF4A	no HNF6	no FOXA3	no HNF1A			Dunnett's multiple comparisons test	Summary	Adjusted P Value
ALB	0.0356612	0.105991	0.0554853	0.0196545	0.0333424			4TFs vs. no HNF4A	ns	0.1638
	0.0509569	0.233712	0.0649286	0.00194029	0.00040992			4TFs vs. no HNF6	ns	0.9934
	0.0239858	0.0527649	0.090923	0.00217566	0.0241673			4TFs vs. no FOXA3	ns	0.3546
	0.181565	0.205238	0.0351358	0.0347754	0.00212928			4TFs vs. no HNF1A	ns	0.3599
Day 15	4 LETFs	no HNF4A	no HNF6	no FOXA3	no HNF1A			Dunnett's multiple comparisons test	Summary	Adjusted P Value
ALB	0.294125	2.58498	0.0852002	0.0924457	0.00906172			4TFs vs. no HNF4A	**	0.0014
	0.101215	1.50512	0.10805	0.105843	0.00430357			4TFs vs. no HNF6	ns	0.9255
	0.917217	2.89519	0.10867	0.0916311	0.0019021			4TFs vs. no FOXA3	ns	0.9379
	0.754703	5.75481	0.313154	0.405544	0.00233834			4TFs vs. no HNF1A	ns	0.7983
Day 20	4 LETFs	no HNF4A	no HNF6	no FOXA3	no HNF1A			Dunnett's multiple comparisons test	Summary	Adjusted P Value
ALB	0.112301	4.79049	0.155014	0.0317594	0.00162239			4TFs vs. no HNF4A	*	0.0225
	2.02029	47.4558	0.0317594	1.5883	0.0144915			4TFs vs. no HNF6	ns	0.9986
	1.49542	25.205	0.217301	6.24651	0.00971496			4TFs vs. no FOXA3	ns	0.9927
	2.05721	7.45166	0.0702041	5.84405	0.000389013			4TFs vs. no HNF1A	ns	0.9979
Day 25	4 LETFs	no HNF4A	no HNF6	no FOXA3	no HNF1A			Dunnett's multiple comparisons test	Summary	Adjusted P Value
ALB	0.075	126.826	0.220721	2.63511	0.0219135			4TFs vs. no HNF4A	ns	0.3454
	0	3.41686	6.61264	4.30487	0.0130306			4TFs vs. no HNF6	ns	0.9815
	32.3533	29.43	0.757149	0.71908	0.00891761			4TFs vs. no FOXA3	ns	0.9739
	10.781	5.78645	4.46708	1.24792	0.00348777			4TFs vs. no HNF1A	ns	0.9432
Controls	HLCs	PHHs
	121.895	256.595
	128.444	262.153
	70.5443	227.761
	67.1498	145.623
Figure 1H. mRNA expression levels of SERPINA1 in hESCs targeted with the 4 LETFs and combinations of 3 factors								Statistical tests
								One-way ANOVA multiple corrections:
Day 10	4 LETFs	no HNF4A	no HNF6	no FOXA3	no HNF1A			Dunnett's multiple comparisons test	Summary	Adjusted P Value									4 LETFs	- HNF4A	- HNF6	- FOXA3	- HNF1A
SERPINA1	64.9609	92.6502	16.6477	43.5621	12.4796			4TFs vs. no HNF4A	ns	0.5428									15.035	387.752	18.7895	103.73	166.465
	57.7891	56.3061	17.3781	6.89652	39.553			4TFs vs. no HNF6	**	0.0074									0.014	53.2158	58.6567	127.707	39.0298
	49.8347	45.5405	3.44057	16.5653	6.02087			4TFs vs. no FOXA3	*	0.0221									286.492	90.4814	61.0664	57.4153	114.857
	126.227	21.8083	19.8671	26.1667	2.72066			4TFs vs. no HNF1A	**	0.0082									179.049	122.691	77.793	116.552	160.168
Day 15	4 LETFs	no HNF4A	no HNF6	no FOXA3	no HNF1A			Dunnett's multiple comparisons test	Summary	Adjusted P Value
SERPINA1	65.1639	85.6732	9.57983	84.2001	47.9015			4TFs vs. no HNF4A	ns	0.9759
	32.4692	102.019	11.2909	20.1192	60.2024			4TFs vs. no HNF6	ns	0.0744
	107.537	61.066	10.2104	32.4111	110.867			4TFs vs. no FOXA3	ns	0.99
	100.767	98.3956	39.4703	136.889	52.0005			4TFs vs. no HNF1A	ns	0.9866
Day 20	4 LETFs	no HNF4A	no HNF6	no FOXA3	no HNF1A			Dunnett's multiple comparisons test	Summary	Adjusted P Value
SERPINA1	19.333	45.4114	15.9948	8.27959	96.0196			4TFs vs. no HNF4A	ns	0.0695
	75.907	264.94	8.27959	39.4257	54.3881			4TFs vs. no HNF6	ns	0.7348
	60.289	145.039	10.0076	57.6743	51.4535			4TFs vs. no FOXA3	ns	0.9999
	21.5696	75.7777	8.08418	86.6942	37.8383			4TFs vs. no HNF1A	ns	0.9737
Day 25	4 LETFs	no HNF4A	no HNF6	no FOXA3	no HNF1A			Dunnett's multiple comparisons test	Summary	Adjusted P Value
SERPINA1	15.035	387.752	18.7895	103.73	166.465			4TFs vs. no HNF4A	ns	0.9191
	0.014	53.2158	58.6567	127.707	39.0298			4TFs vs. no HNF6	ns	0.7401
	286.492	90.4814	61.0664	57.4153	114.857			4TFs vs. no FOXA3	ns	0.9958
	179.049	122.691	77.793	116.552	160.168			4TFs vs. no HNF1A	ns	>0.9999
Controls	HLCs	PHHs
	277.722	95.0983
	435.039	124.772
	153.87	90.7025
	185.505	28.6593
Figure 1I. mRNA expression levels of AFP in hESCs targeted with the 4 LETFs and combinations of 3 factors								Statistical tests
								One-way ANOVA multiple corrections:
Day 10	4 LETFs	no HNF4A	no HNF6	no FOXA3	no HNF1A			Dunnett's multiple comparisons test	Summary	Adjusted P Value
AFP	25.9651	1.30608	11.1754	13.6091	0.004498			4TFs vs. no HNF4A	*	0.0145
	45.571	1.19133	13.512	2.48978	0.00756671			4TFs vs. no HNF6	*	0.0158
	47.882	31.1383	5.57566	5.15312	0.003			4TFs vs. no FOXA3	**	0.007
	120.804	16.0177	21.8112	7.78785	0.00298051			4TFs vs. no HNF1A	**	0.0025
Day 15	4 LETFs	no HNF4A	no HNF6	no FOXA3	no HNF1A			Dunnett's multiple comparisons test	Summary	Adjusted P Value
AFP	49.4535	8.19169	7.64226	56.64	0.0228209			4TFs vs. no HNF4A	ns	0.7814
	5.12126	11.8303	18.6065	1.46409	0.0382539			4TFs vs. no HNF6	ns	0.9808
	77.93	21.436	5.74413	15.5987	0.02			4TFs vs. no FOXA3	ns	0.9911
	23.098	295.937	39.9578	149.652	0.00928126			4TFs vs. no HNF1A	ns	0.856
Day 20	4 LETFs	no HNF4A	no HNF6	no FOXA3	no HNF1A			Dunnett's multiple comparisons test	Summary	Adjusted P Value
AFP	0.432	5.58753	1.17105	8.43988	0.012			4TFs vs. no HNF4A	*	0.0259
	25.291	319.278	8.43988	5.32192	0.00807792			4TFs vs. no HNF6	ns	0.9983
	3.141	155.978	21.0513	168.519	0.00164624			4TFs vs. no FOXA3	ns	0.8735
	50.0512	188.586	6.90449	37.8383	0.00207107			4TFs vs. no HNF1A	ns	0.9813
Day 25	4 LETFs	no HNF4A	no HNF6	no FOXA3	no HNF1A			Dunnett's multiple comparisons test	Summary	Adjusted P Value
AFP	0.105	4.51108	0.77153	1.35517	0.015			4TFs vs. no HNF4A	ns	0.9296
	0.002	1.29089	12.7618	69.4522	0.00315325			4TFs vs. no HNF6	ns	0.8569
	44.5701	34.8358	3.22275	21.6925	0.00987808			4TFs vs. no FOXA3	ns	0.7801
	41.1471	89.3856	13.1299	59.0143	0.00647393			4TFs vs. no HNF1A	ns	0.6006
Controls	HLCs	PHHs
	251.254	0.004
	156.498	0.0036
	54.6834	0.005
	33.8221	0.0014
Figure 1J. CYP3A4 activity levels in hESCs targeted with the 4 LETFs and combinations of 3 factors								Statistical tests
								One-way ANOVA multiple corrections:	Summary	Adjusted P Value
Day 10	4 LETFs	no HNF4A	no HNF6	no FOXA3	no HNF1A			Dunnett's multiple comparisons test	ns	0.9985
RLU/ml/million	38470	19536	4911	28558	74515			4TFs vs. no HNF4A	ns	0.861
	85	21222	3435	12282	9593			4TFs vs. no HNF6	ns	0.9998
	31472	34142	22756	18340	12260			4TFs vs. no FOXA3	ns	0.8983
	17273							4TFs vs. no HNF1A
Day 15	4 LETFs	no HNF4A	no HNF6	no FOXA3	no HNF1A				Summary	Adjusted P Value
RLU/ml/million	41413	73117	9834	24823	26519			Dunnett's multiple comparisons test	**	0.0034
	6453	144310	784	17423	4085			4TFs vs. no HNF4A	ns	0.566
	36337	243048	6746	16725	10416			4TFs vs. no HNF6	ns	0.9197
	98977	267653	4177	36866	24587			4TFs vs. no FOXA3	ns	0.8063
	36826	73352			26650			4TFs vs. no HNF1A
Day 20	4 LETFs	no HNF4A	no HNF6	no FOXA3	no HNF1A			Dunnett's multiple comparisons test	Summary	Adjusted P Value
RLU/ml/million	1003	48479	1486	18125	27041			4TFs vs. no HNF4A	**	0.0042
	50080	237359	3536	66643	6570			4TFs vs. no HNF6	ns	0.953
	16923	336017	2384	35375	32208			4TFs vs. no FOXA3	ns	0.9993
	57626	328819						4TFs vs. no HNF1A	ns	0.9991
Day 25	4 LETFs	no HNF4A	no HNF6	no FOXA3	no HNF1A			Dunnett's multiple comparisons test	Summary	Adjusted P Value
RLU/ml/million	3138	197791	4392	54017	10280			4TFs vs. no HNF4A	ns	0.4894
	26055	22745	2980	74953	9342			4TFs vs. no HNF6	ns	0.881
	94921	152190	4145	47270	26221			4TFs vs. no FOXA3	ns	0.8669
		60294		135299	206497			4TFs vs. no HNF1A	ns	0.9746
Controls	HLCs	PHHs
	31007.8	31858954
	19709.3	26392379
	125751	3813647
	108692	5129301
	279307
	47814.9
Note: The 4 LETFs datapoints in Figure 1G-J are the same used in Figure 1E-F for comparison.
Note: The HLCs and PHHs CYP3A4 and qPCR datapoints in this figure are the same throughout the manuscript for comparison.
