# Supplementary material for: Generation of functional hepatocytes by forward programming with nuclear receptors
Source: eLife. 2022 Aug 12;11:e71591. doi: 10.7554/eLife.71591 (PMC9374437; doi:10.7554/eLife.71591)
Supplement: Figure 2—source data 1. [file elife-71591-fig2-data1.xlsx]

## Sheet: Sheet1
Figure 2B. CYP3A4 activity levels in HLCs and PHHs							Statistical tests
RLU/ml/million	HLCs	PHHs					t-test:
	31007.8	31858954					P value	0.019
	19709.3	26392379					P value summary	*
	125751	3813647					Significantly different (P < 0.05)?	Yes
	108692	5129301					One- or two-tailed P value?	Two-tailed
	279307						t, df	t=2.930, df=8
	47814.9
Figure 2 - figure supplement 1A. mRNA expression levels during HLC differentiation
NANOG	0	4	9	12	23	30
	1.84517	0.0925258	0.0126848	0.00701301	0.00514571	0.00330416
	2.53415	0.171556	0.00704345	0.00332599	0.0015594	0.00163951
	2.77069	0.0409304	0.0513408	0.00119817	0.00146108	0.00215069
	3.92536	0.0329986	0.0017	0.00307413	0.00565699	0.00140156
POU5F1	0	4	9	12	23	30
	3.54	0.210808	0.0189357	0.00803075	0.0288968	0.0128508
	3.40936	0.0761638	0.0740878	0.0114342	0.00890088	0.00512296
	4.00522	0.14396	0.0768799	0.00807897	0.00302416	0.00798907
	4.32271	0.0538915	0.0246	0.0250942	0.0285523	0.089732
SOX17	0	4	9	12	23	30
	7.10246e-06	0.109159	0.120805	0.054551	0.00725221	2.3459e-05
	5.51962e-06	0.261385	0.288974	0.0139509	0.00140278	8.8658e-05
	5.15035e-05	0.430027	0.446034	0.0182604	0.00450815	0.00557843
	0.00529843	0.100295	0.1248	0.0300853	0.00274068	0.00090827
HEX	0	4	9	12	23	30
	0.000593382	0.00585141	0.0550639	0.0118067	0.0069245	0.00404961
	0.00127305	0.00632267	0.156994	0.0181864	0.00898438	0.0161189
	0.000199833	0.00778121	0.0332558	0.0116679	0.00625727	0.00750088
	0.00836752	0.000819812	0.0782	0.00257118	0.00458695	0.00523476
TBX3	0	4	9	12	23	30
	0.0019616	0.068512	0.676776	2.3962	0.421833	0.306403
	0.000920688	0.228814	1.12758	2.12432	0.196582	0.166129
	0.000417746	0.0357271	0.0580222	0.909374	0.11051	0.102318
	0.00985474	0.0723549	0.6011	1.00306	0.10914	0.0710439
AFP	0	4	9	12	23	30
	0.00127179	0.000868311	0.00466551	124.694	265.456	251.254
	0.00151479	0.000976393	1.46372e-05	16.6506	207.577	156.498
	0.00137728	6.98407e-06	0.00254918	2.81858	392.827	54.6834
	0.00529843	0.000564191	0.0006	18.52	476.803	33.8221
ALB	0	4	9	12	23	30
	0.0015623	0.000896133	0.00119378	0.00316353	3.53079	121.895
	0.00175064	0.000626347	4.56192e-05	0.00340767	15.0584	128.444
	0.00058881	0.000108689	0.000881501	0.00195204	15.2026	70.5443
	0.000681798	0.00033253	0.0012	0.00156594	29.8105	67.1498
Figure 2 - figure supplement 1B. mRNA expression levels of the 4 LETFs during HLC differentiation
HNF1A	0	4	9	12	23	30
	5.89356e-05	0.00920313	0.00225864	0.0316102	0.0983381	0.0284268
	7.79039e-05	0.0019104	0.00406086	0.0213148	0.0827529	0.0784129
	0.000258175	0.000957497	0.00825021	0.00547458	0.0705865	0.0209991
	0.000875872	0.000270786	0.0003	0.00496426	0.100255	0.0151019
HNF4A	0	4	9	12	23	30
	0.000180277	0.0305433	0.116205	1.25158	1.18009	0.219151
	0.000165765	0.00850337	0.298334	0.681365	1.91521	1.26576
	5.36622e-05	0.012495	0.150439	0.17907	0.470984	0.273404
	0.00797887	0.00165163	0.207	0.731762	0.6091	0.260396
HNF6	0	4	9	12	23	30
	9.99801e-05	0.0254948	0.0125152	0.156834	0.144542	0.0389806
	0.00137431	0.00471075	0.0585156	0.00131748	0.193418	0.112197
	0.000616601	0.00172072	0.0486118	0.00580024	0.179696	0.0209285
	0.00906975	0.000638095	0.0061	0.0135895	0.0260197	0.0117122
FOXA3	0	4	9	12	23	30
	0.0175912	0.285787	0.285787	0.408312	0.76692	0.216832
	0.037987	0.0952829	0.0952829	0.139129	0.600743	0.363827
	0.0340824	0.0619983	0.0619983	0.141611	1.10853	0.184018
	0.0906965	0.0231312	0.0231312	0.222302	0.220179	0.0804764
Figure 2 - figure supplement 1C. mRNA expression levels of the 4 LETFs in hiPSC, HLCs and PHHs							Statistical tests
							One-way ANOVA multiple corrections:
HNF1A	hiPSCs	HLCs	PHHs				Dunnett's multiple comparisons test	Summary	Adjusted P Value
	6e-05	0.0284268	0.0422				PHHs vs. hiPSCs	ns	0.0621
	8e-05	0.0784129	0.0558				PHHs vs. HLCs	ns	>0.9999
	0.00026	0.0209991	0.0354
	0.00088	0.0151019	0.0093
HNF4A	hiPSCs	HLCs	PHHs				Dunnett's multiple comparisons test	Summary	Adjusted P Value
	0.00018	0.219151	0.4662				PHHs vs. hiPSCs	ns	0.2521
	0.00017	1.26576	0.5771				PHHs vs. HLCs	ns	0.7442
	5e-05	0.273404	0.3153
	0.00798	0.260396	0.0669
HNF6	hiPSCs	HLCs	PHHs				Dunnett's multiple comparisons test	Summary	Adjusted P Value
	0.0001	0.0389806	0.0451				PHHs vs. hiPSCs	ns	0.2566
	0.00137	0.112197	0.026				PHHs vs. HLCs	ns	0.8383
	0.00062	0.0209285	0.0625
	0.00907	0.0117122	0.0082
FOXA3	hiPSCs	HLCs	PHHs				Dunnett's multiple comparisons test	Summary	Adjusted P Value
	0.01759	0.216832	0.2215				PHHs vs. hiPSCs	ns	0.595
	0.03799	0.363827	0.121				PHHs vs. HLCs	ns	0.1841
	0.03408	0.184018	0.0444
	0.0907	0.0804764	0.0149
Figure 2 - figure supplement 1D. mRNA expression levels in hiPSC, HLCs and PHHs							Statistical tests
ALB	hiPSCs	HLCs	PHHs				One-way ANOVA multiple corrections:
	0.00156	121.895	256.595				Dunnett's multiple comparisons test	Summary	Adjusted P Value
	0.00175	128.444	262.153				PHHs vs. hiPSCs	****	<0.0001
	0.00059	70.5443	227.761				PHHs vs. HLCs	**	0.0016
	0.00068	67.1498	145.623
SERPINA1	hiPSCs	HLCs	PHHs
	0.00923	277.722	95.0983				Dunnett's multiple comparisons test	Summary	Adjusted P Value
	0.01094	435.039	124.772				PHHs vs. hiPSCs	ns	0.2516
	0.00892	153.87	90.7025				PHHs vs. HLCs	*	0.0169
	0.0003	185.505	28.6593
AFP	hiPSCs	HLCs	PHHs
	0.00127	251.254	0.004				Dunnett's multiple comparisons test	Summary	Adjusted P Value
	0.00151	156.498	0.0036				PHHs vs. hiPSCs	ns	>0.9999
	0.00138	54.6834	0.005				PHHs vs. HLCs	*	0.0258
	0.0053	33.8221	0.0014
Figure 2 - figure supplement 1E. mRNA expression levels in hiPSC, HLCs and PHHs							Statistical tests
CYP3A4	hiPSCs	HLCs	PHHs				One-way ANOVA multiple corrections:
	0.00034	0.00656214	0.3674				Dunnett's multiple comparisons test	Summary	Adjusted P Value
	0.00091	0.00396372	0.5461				PHHs vs. hiPSCs	**	0.0015
	0.00036	0.0104649	0.7964				PHHs vs. HLCs	**	0.0016
	0.00418	0.00363187	0.2381
CYP2A6	hiPSCs	HLCs	PHHs
	0.00023	0.00636339	0.2355				Dunnett's multiple comparisons test	Summary	Adjusted P Value
	0.00055	0.00430364	0.4034				PHHs vs. hiPSCs	***	0.0006
	0.00036	0.0107859	0.4263				PHHs vs. HLCs	***	0.0007
	0.00212	0.00308404	0.6973
CYP2C9	hiPSCs	HLCs	PHHs
	2e-05	0.0002248	0.6562				Dunnett's multiple comparisons test	Summary	Adjusted P Value
	6e-05	0.00458155	0.8302				PHHs vs. hiPSCs	****	<0.0001
	0	0.0123574	0.4699				PHHs vs. HLCs	****	<0.0001
	0.00133	0.00090963	0.4673
Note: The hiPSCs, HLCs (D30) and PHHs datapoints in this figure are the same throughout the manuscript for comparison.
