# Supplementary material for: Generation of functional hepatocytes by forward programming with nuclear receptors
Source: eLife. 2022 Aug 12;11:e71591. doi: 10.7554/eLife.71591 (PMC9374437; doi:10.7554/eLife.71591)
Supplement: Figure 2—source data 2. [file elife-71591-fig2-data2.xlsx]

## Sheet: Sheet1
Source data 2. List of genes differentially expressed in the 4 clusters in Figure 2D
	Cluster	Gene	Symbol
1	1 (PHHs)	ENSG00000000971	CFH
2	1 (PHHs)	ENSG00000001084	GCLC
3	1 (PHHs)	ENSG00000002726	AOC1
4	1 (PHHs)	ENSG00000002933	TMEM176A
5	1 (PHHs)	ENSG00000004799	PDK4
6	1 (PHHs)	ENSG00000004864	SLC25A13
7	1 (PHHs)	ENSG00000005187	ACSM3
8	1 (PHHs)	ENSG00000005421	PON1
9	1 (PHHs)	ENSG00000005471	ABCB4
10	1 (PHHs)	ENSG00000006210	CX3CL1
11	1 (PHHs)	ENSG00000007001	UPP2
12	1 (PHHs)	ENSG00000007933	FMO3
13	1 (PHHs)	ENSG00000008394	MGST1
14	1 (PHHs)	ENSG00000008441	NFIX
15	1 (PHHs)	ENSG00000009694	TENM1
16	1 (PHHs)	ENSG00000009724	MASP2
17	1 (PHHs)	ENSG00000009765	IYD
18	1 (PHHs)	ENSG00000010327	STAB1
19	1 (PHHs)	ENSG00000010379	SLC6A13
20	1 (PHHs)	ENSG00000010610	CD4
21	1 (PHHs)	ENSG00000011465	DCN
22	1 (PHHs)	ENSG00000012504	NR1H4
23	1 (PHHs)	ENSG00000013441	CLK1
24	1 (PHHs)	ENSG00000015520	NPC1L1
25	1 (PHHs)	ENSG00000016391	CHDH
26	1 (PHHs)	ENSG00000017427	IGF1
27	1 (PHHs)	ENSG00000019169	MARCO
28	1 (PHHs)	ENSG00000019582	CD74
29	1 (PHHs)	ENSG00000021461	CYP3A43
30	1 (PHHs)	ENSG00000021488	SLC7A9
31	1 (PHHs)	ENSG00000021852	C8B
32	1 (PHHs)	ENSG00000023330	ALAS1
33	1 (PHHs)	ENSG00000023445	BIRC3
34	1 (PHHs)	ENSG00000024862	CCDC28A
35	1 (PHHs)	ENSG00000025423	HSD17B6
36	1 (PHHs)	ENSG00000026103	FAS
37	1 (PHHs)	ENSG00000028137	TNFRSF1B
38	1 (PHHs)	ENSG00000032742	IFT88
39	1 (PHHs)	ENSG00000036473	OTC
40	1 (PHHs)	ENSG00000039537	C6
41	1 (PHHs)	ENSG00000041880	PARP3
42	1 (PHHs)	ENSG00000042445	RETSAT
43	1 (PHHs)	ENSG00000042781	USH2A
44	1 (PHHs)	ENSG00000047457	CP
45	1 (PHHs)	ENSG00000049246	PER3
46	1 (PHHs)	ENSG00000055955	ITIH4
47	1 (PHHs)	ENSG00000055957	ITIH1
48	1 (PHHs)	ENSG00000056558	TRAF1
49	1 (PHHs)	ENSG00000056736	IL17RB
50	1 (PHHs)	ENSG00000057593	F7
51	1 (PHHs)	ENSG00000060566	CREB3L3
52	1 (PHHs)	ENSG00000060762	MPC1
53	1 (PHHs)	ENSG00000063854	HAGH
54	1 (PHHs)	ENSG00000064115	TM7SF3
55	1 (PHHs)	ENSG00000064225	ST3GAL6
56	1 (PHHs)	ENSG00000065054	SLC9A3R2
57	1 (PHHs)	ENSG00000065534	MYLK
58	1 (PHHs)	ENSG00000069020	MAST4
59	1 (PHHs)	ENSG00000069431	ABCC9
60	1 (PHHs)	ENSG00000069535	MAOB
61	1 (PHHs)	ENSG00000069702	TGFBR3
62	1 (PHHs)	ENSG00000072080	SPP2
63	1 (PHHs)	ENSG00000072210	ALDH3A2
64	1 (PHHs)	ENSG00000073417	PDE8A
65	1 (PHHs)	ENSG00000073754	CD5L
66	1 (PHHs)	ENSG00000073910	FRY
67	1 (PHHs)	ENSG00000074276	CDHR2
68	1 (PHHs)	ENSG00000074416	MGLL
69	1 (PHHs)	ENSG00000074527	NTN4
70	1 (PHHs)	ENSG00000074935	TUBE1
71	1 (PHHs)	ENSG00000075239	ACAT1
72	1 (PHHs)	ENSG00000075643	MOCOS
73	1 (PHHs)	ENSG00000075790	BCAP29
74	1 (PHHs)	ENSG00000076258	FMO4
75	1 (PHHs)	ENSG00000076555	ACACB
76	1 (PHHs)	ENSG00000077420	APBB1IP
77	1 (PHHs)	ENSG00000078070	MCCC1
78	1 (PHHs)	ENSG00000078487	ZCWPW1
79	1 (PHHs)	ENSG00000079557	AFM
80	1 (PHHs)	ENSG00000080493	SLC4A4
81	1 (PHHs)	ENSG00000080573	COL5A3
82	1 (PHHs)	ENSG00000080618	CPB2
83	1 (PHHs)	ENSG00000080709	KCNN2
84	1 (PHHs)	ENSG00000080910	CFHR2
85	1 (PHHs)	ENSG00000081041	CXCL2
86	1 (PHHs)	ENSG00000083123	BCKDHB
87	1 (PHHs)	ENSG00000083807	SLC27A5
88	1 (PHHs)	ENSG00000084110	HAL
89	1 (PHHs)	ENSG00000084734	GCKR
90	1 (PHHs)	ENSG00000084754	HADHA
91	1 (PHHs)	ENSG00000085117	CD82
92	1 (PHHs)	ENSG00000085563	ABCB1
93	1 (PHHs)	ENSG00000085871	MGST2
94	1 (PHHs)	ENSG00000086205	FOLH1
95	1 (PHHs)	ENSG00000086300	SNX10
96	1 (PHHs)	ENSG00000086696	HSD17B2
97	1 (PHHs)	ENSG00000087250	MT3
98	1 (PHHs)	ENSG00000087258	GNAO1
99	1 (PHHs)	ENSG00000088827	SIGLEC1
100	1 (PHHs)	ENSG00000088926	F11
101	1 (PHHs)	ENSG00000089041	P2RX7
102	1 (PHHs)	ENSG00000089057	SLC23A2
103	1 (PHHs)	ENSG00000090382	LYZ
104	1 (PHHs)	ENSG00000090512	FETUB
105	1 (PHHs)	ENSG00000091428	RAPGEF4
106	1 (PHHs)	ENSG00000091583	APOH
107	1 (PHHs)	ENSG00000091831	ESR1
108	1 (PHHs)	ENSG00000092529	CAPN3
109	1 (PHHs)	ENSG00000092607	TBX15
110	1 (PHHs)	ENSG00000093134	VNN3
111	1 (PHHs)	ENSG00000093217	XYLB
112	1 (PHHs)	ENSG00000095203	EPB41L4B
113	1 (PHHs)	ENSG00000095585	BLNK
114	1 (PHHs)	ENSG00000095932	SMIM24
115	1 (PHHs)	ENSG00000099260	PALMD
116	1 (PHHs)	ENSG00000099377	HSD3B7
117	1 (PHHs)	ENSG00000099769	IGFALS
118	1 (PHHs)	ENSG00000099834	CDHR5
119	1 (PHHs)	ENSG00000099860	GADD45B
120	1 (PHHs)	ENSG00000099937	SERPIND1
121	1 (PHHs)	ENSG00000099974	DDTL
122	1 (PHHs)	ENSG00000100003	SEC14L2
123	1 (PHHs)	ENSG00000100024	UPB1
124	1 (PHHs)	ENSG00000100097	LGALS1
125	1 (PHHs)	ENSG00000100197	CYP2D6
126	1 (PHHs)	ENSG00000100557	CCDC198
127	1 (PHHs)	ENSG00000100577	GSTZ1
128	1 (PHHs)	ENSG00000100652	SLC10A1
129	1 (PHHs)	ENSG00000100665	SERPINA4
130	1 (PHHs)	ENSG00000100714	MTHFD1
131	1 (PHHs)	ENSG00000100867	DHRS2
132	1 (PHHs)	ENSG00000100889	PCK2
133	1 (PHHs)	ENSG00000100906	NFKBIA
134	1 (PHHs)	ENSG00000101204	CHRNA4
135	1 (PHHs)	ENSG00000101323	HAO1
136	1 (PHHs)	ENSG00000101577	LPIN2
137	1 (PHHs)	ENSG00000101605	MYOM1
138	1 (PHHs)	ENSG00000101670	LIPG
139	1 (PHHs)	ENSG00000101695	RNF125
140	1 (PHHs)	ENSG00000101981	F9
141	1 (PHHs)	ENSG00000102362	SYTL4
142	1 (PHHs)	ENSG00000102575	ACP5
143	1 (PHHs)	ENSG00000102796	DHRS12
144	1 (PHHs)	ENSG00000102910	LONP2
145	1 (PHHs)	ENSG00000103154	NECAB2
146	1 (PHHs)	ENSG00000103528	SYT17
147	1 (PHHs)	ENSG00000103569	AQP9
148	1 (PHHs)	ENSG00000103942	HOMER2
149	1 (PHHs)	ENSG00000104267	CA2
150	1 (PHHs)	ENSG00000104325	DECR1
151	1 (PHHs)	ENSG00000104691	UBXN8
152	1 (PHHs)	ENSG00000104870	FCGRT
153	1 (PHHs)	ENSG00000104883	PEX11G
154	1 (PHHs)	ENSG00000104938	CLEC4M
155	1 (PHHs)	ENSG00000105398	SULT2A1
156	1 (PHHs)	ENSG00000105499	PLA2G4C
157	1 (PHHs)	ENSG00000105550	FGF21
158	1 (PHHs)	ENSG00000105607	GCDH
159	1 (PHHs)	ENSG00000105697	HAMP
160	1 (PHHs)	ENSG00000105784	RUNDC3B
161	1 (PHHs)	ENSG00000105852	PON3
162	1 (PHHs)	ENSG00000105974	CAV1
163	1 (PHHs)	ENSG00000105976	MET
164	1 (PHHs)	ENSG00000106034	CPED1
165	1 (PHHs)	ENSG00000106049	HIBADH
166	1 (PHHs)	ENSG00000106069	CHN2
167	1 (PHHs)	ENSG00000106153	CHCHD2
168	1 (PHHs)	ENSG00000106258	CYP3A5
169	1 (PHHs)	ENSG00000106327	TFR2
170	1 (PHHs)	ENSG00000106526	ACTR3C
171	1 (PHHs)	ENSG00000106538	RARRES2
172	1 (PHHs)	ENSG00000106565	TMEM176B
173	1 (PHHs)	ENSG00000106617	PRKAG2
174	1 (PHHs)	ENSG00000106733	NMRK1
175	1 (PHHs)	ENSG00000106823	ECM2
176	1 (PHHs)	ENSG00000106927	AMBP
177	1 (PHHs)	ENSG00000107186	MPDZ
178	1 (PHHs)	ENSG00000107282	APBA1
179	1 (PHHs)	ENSG00000107537	PHYH
180	1 (PHHs)	ENSG00000107736	CDH23
181	1 (PHHs)	ENSG00000107738	VSIR
182	1 (PHHs)	ENSG00000107864	CPEB3
183	1 (PHHs)	ENSG00000107897	ACBD5
184	1 (PHHs)	ENSG00000108176	DNAJC12
185	1 (PHHs)	ENSG00000108187	PBLD
186	1 (PHHs)	ENSG00000108242	CYP2C18
187	1 (PHHs)	ENSG00000108381	ASPA
188	1 (PHHs)	ENSG00000108387	SEPTIN4
189	1 (PHHs)	ENSG00000108389	MTMR4
190	1 (PHHs)	ENSG00000108439	PNPO
191	1 (PHHs)	ENSG00000108691	CCL2
192	1 (PHHs)	ENSG00000108771	DHX58
193	1 (PHHs)	ENSG00000108924	HLF
194	1 (PHHs)	ENSG00000108950	FAM20A
195	1 (PHHs)	ENSG00000109072	VTN
196	1 (PHHs)	ENSG00000109181	UGT2B10
197	1 (PHHs)	ENSG00000109193	SULT1E1
198	1 (PHHs)	ENSG00000109320	NFKB1
199	1 (PHHs)	ENSG00000109511	ANXA10
200	1 (PHHs)	ENSG00000109576	AADAT
201	1 (PHHs)	ENSG00000109667	SLC2A9
202	1 (PHHs)	ENSG00000109758	HGFAC
203	1 (PHHs)	ENSG00000109794	FAM149A
204	1 (PHHs)	ENSG00000109819	PPARGC1A
205	1 (PHHs)	ENSG00000110031	LPXN
206	1 (PHHs)	ENSG00000110077	MS4A6A
207	1 (PHHs)	ENSG00000110169	HPX
208	1 (PHHs)	ENSG00000110243	APOA5
209	1 (PHHs)	ENSG00000110436	SLC1A2
210	1 (PHHs)	ENSG00000110887	DAO
211	1 (PHHs)	ENSG00000111181	SLC6A12
212	1 (PHHs)	ENSG00000111249	CUX2
213	1 (PHHs)	ENSG00000111266	DUSP16
214	1 (PHHs)	ENSG00000111269	CREBL2
215	1 (PHHs)	ENSG00000111275	ALDH2
216	1 (PHHs)	ENSG00000111335	OAS2
217	1 (PHHs)	ENSG00000111339	ART4
218	1 (PHHs)	ENSG00000111700	SLCO1B3
219	1 (PHHs)	ENSG00000111713	GYS2
220	1 (PHHs)	ENSG00000111801	BTN3A3
221	1 (PHHs)	ENSG00000112096	SOD2
222	1 (PHHs)	ENSG00000112293	GPLD1
223	1 (PHHs)	ENSG00000112294	ALDH5A1
224	1 (PHHs)	ENSG00000112297	CRYBG1
225	1 (PHHs)	ENSG00000112299	VNN1
226	1 (PHHs)	ENSG00000112337	SLC17A2
227	1 (PHHs)	ENSG00000112936	C7
228	1 (PHHs)	ENSG00000112964	GHR
229	1 (PHHs)	ENSG00000112992	NNT
230	1 (PHHs)	ENSG00000113269	RNF130
231	1 (PHHs)	ENSG00000113389	NPR3
232	1 (PHHs)	ENSG00000113492	AGXT2
233	1 (PHHs)	ENSG00000113580	NR3C1
234	1 (PHHs)	ENSG00000113600	C9
235	1 (PHHs)	ENSG00000113790	EHHADH
236	1 (PHHs)	ENSG00000113889	KNG1
237	1 (PHHs)	ENSG00000113905	HRG
238	1 (PHHs)	ENSG00000114021	NIT2
239	1 (PHHs)	ENSG00000114166	KAT2B
240	1 (PHHs)	ENSG00000114200	BCHE
241	1 (PHHs)	ENSG00000114698	PLSCR4
242	1 (PHHs)	ENSG00000114737	CISH
243	1 (PHHs)	ENSG00000114771	AADAC
244	1 (PHHs)	ENSG00000114779	ABHD14B
245	1 (PHHs)	ENSG00000114812	VIPR1
246	1 (PHHs)	ENSG00000115107	STEAP3
247	1 (PHHs)	ENSG00000115290	GRB14
248	1 (PHHs)	ENSG00000115361	ACADL
249	1 (PHHs)	ENSG00000115363	EVA1A
250	1 (PHHs)	ENSG00000115468	EFHD1
251	1 (PHHs)	ENSG00000115718	PROC
252	1 (PHHs)	ENSG00000115738	ID2
253	1 (PHHs)	ENSG00000115841	RMDN2
254	1 (PHHs)	ENSG00000115919	KYNU
255	1 (PHHs)	ENSG00000116171	SCP2
256	1 (PHHs)	ENSG00000116194	ANGPTL1
257	1 (PHHs)	ENSG00000116667	C1orf21
258	1 (PHHs)	ENSG00000116678	LEPR
259	1 (PHHs)	ENSG00000116690	PRG4
260	1 (PHHs)	ENSG00000116761	CTH
261	1 (PHHs)	ENSG00000116771	AGMAT
262	1 (PHHs)	ENSG00000116785	CFHR3
263	1 (PHHs)	ENSG00000116791	CRYZ
264	1 (PHHs)	ENSG00000116882	HAO2
265	1 (PHHs)	ENSG00000117009	KMO
266	1 (PHHs)	ENSG00000117054	ACADM
267	1 (PHHs)	ENSG00000117143	UAP1
268	1 (PHHs)	ENSG00000117228	GBP1
269	1 (PHHs)	ENSG00000117594	HSD11B1
270	1 (PHHs)	ENSG00000117601	SERPINC1
271	1 (PHHs)	ENSG00000117643	MAN1C1
272	1 (PHHs)	ENSG00000117707	PROX1
273	1 (PHHs)	ENSG00000117791	2002-03-01
274	1 (PHHs)	ENSG00000118004	COLEC11
275	1 (PHHs)	ENSG00000118137	APOA1
276	1 (PHHs)	ENSG00000118271	TTR
277	1 (PHHs)	ENSG00000118514	ALDH8A1
278	1 (PHHs)	ENSG00000118520	ARG1
279	1 (PHHs)	ENSG00000118855	MFSD1
280	1 (PHHs)	ENSG00000119125	GDA
281	1 (PHHs)	ENSG00000119547	ONECUT2
282	1 (PHHs)	ENSG00000119673	ACOT2
283	1 (PHHs)	ENSG00000119699	TGFB3
284	1 (PHHs)	ENSG00000119711	ALDH6A1
285	1 (PHHs)	ENSG00000119938	PPP1R3C
286	1 (PHHs)	ENSG00000120053	GOT1
287	1 (PHHs)	ENSG00000120054	CPN1
288	1 (PHHs)	ENSG00000120158	RCL1
289	1 (PHHs)	ENSG00000120341	SEC16B
290	1 (PHHs)	ENSG00000120885	CLU
291	1 (PHHs)	ENSG00000120907	ADRA1A
292	1 (PHHs)	ENSG00000120915	EPHX2
293	1 (PHHs)	ENSG00000121270	ABCC11
294	1 (PHHs)	ENSG00000121310	ECHDC2
295	1 (PHHs)	ENSG00000121350	PYROXD1
296	1 (PHHs)	ENSG00000121361	KCNJ8
297	1 (PHHs)	ENSG00000121410	A1BG
298	1 (PHHs)	ENSG00000121552	CSTA
299	1 (PHHs)	ENSG00000121690	DEPDC7
300	1 (PHHs)	ENSG00000121691	CAT
301	1 (PHHs)	ENSG00000121966	CXCR4
302	1 (PHHs)	ENSG00000122121	XPNPEP2
303	1 (PHHs)	ENSG00000122194	PLG
304	1 (PHHs)	ENSG00000122420	PTGFR
305	1 (PHHs)	ENSG00000122787	AKR1D1
306	1 (PHHs)	ENSG00000122862	SRGN
307	1 (PHHs)	ENSG00000122877	EGR2
308	1 (PHHs)	ENSG00000122971	ACADS
309	1 (PHHs)	ENSG00000123104	ITPR2
310	1 (PHHs)	ENSG00000123146	ADGRE5
311	1 (PHHs)	ENSG00000123342	MMP19
312	1 (PHHs)	ENSG00000123453	SARDH
313	1 (PHHs)	ENSG00000123454	DBH
314	1 (PHHs)	ENSG00000123561	SERPINA7
315	1 (PHHs)	ENSG00000123838	C4BPA
316	1 (PHHs)	ENSG00000123843	C4BPB
317	1 (PHHs)	ENSG00000124098	FAM210B
318	1 (PHHs)	ENSG00000124253	PCK1
319	1 (PHHs)	ENSG00000124523	SIRT5
320	1 (PHHs)	ENSG00000124564	SLC17A3
321	1 (PHHs)	ENSG00000124568	SLC17A1
322	1 (PHHs)	ENSG00000124713	GNMT
323	1 (PHHs)	ENSG00000125144	MT1G
324	1 (PHHs)	ENSG00000125148	MT2A
325	1 (PHHs)	ENSG00000125246	CLYBL
326	1 (PHHs)	ENSG00000125430	HS3ST3B1
327	1 (PHHs)	ENSG00000125551	PLGLB2
328	1 (PHHs)	ENSG00000125637	PSD4
329	1 (PHHs)	ENSG00000125675	GRIA3
330	1 (PHHs)	ENSG00000125730	C3
331	1 (PHHs)	ENSG00000125735	TNFSF14
332	1 (PHHs)	ENSG00000125740	FOSB
333	1 (PHHs)	ENSG00000126231	PROZ
334	1 (PHHs)	ENSG00000126522	ASL
335	1 (PHHs)	ENSG00000126759	CFP
336	1 (PHHs)	ENSG00000126838	PZP
337	1 (PHHs)	ENSG00000127324	TSPAN8
338	1 (PHHs)	ENSG00000127884	ECHS1
339	1 (PHHs)	ENSG00000127948	POR
340	1 (PHHs)	ENSG00000127951	FGL2
341	1 (PHHs)	ENSG00000127954	STEAP4
342	1 (PHHs)	ENSG00000128284	APOL3
343	1 (PHHs)	ENSG00000128311	TST
344	1 (PHHs)	ENSG00000128641	MYO1B
345	1 (PHHs)	ENSG00000128918	ALDH1A2
346	1 (PHHs)	ENSG00000128928	IVD
347	1 (PHHs)	ENSG00000129151	BBOX1
348	1 (PHHs)	ENSG00000129214	SHBG
349	1 (PHHs)	ENSG00000129538	RNASE1
350	1 (PHHs)	ENSG00000129596	CDO1
351	1 (PHHs)	ENSG00000129965	INS-IGF2
352	1 (PHHs)	ENSG00000130173	ANGPTL8
353	1 (PHHs)	ENSG00000130208	APOC1
354	1 (PHHs)	ENSG00000130222	GADD45G
355	1 (PHHs)	ENSG00000130234	ACE2
356	1 (PHHs)	ENSG00000130649	CYP2E1
357	1 (PHHs)	ENSG00000130653	PNPLA7
358	1 (PHHs)	ENSG00000130707	ASS1
359	1 (PHHs)	ENSG00000130988	RGN
360	1 (PHHs)	ENSG00000131187	F12
361	1 (PHHs)	ENSG00000131620	ANO1
362	1 (PHHs)	ENSG00000131773	KHDRBS3
363	1 (PHHs)	ENSG00000131781	FMO5
364	1 (PHHs)	ENSG00000131910	NR0B2
365	1 (PHHs)	ENSG00000131979	GCH1
366	1 (PHHs)	ENSG00000132326	PER2
367	1 (PHHs)	ENSG00000132386	SERPINF1
368	1 (PHHs)	ENSG00000132437	DDC
369	1 (PHHs)	ENSG00000132481	TRIM47
370	1 (PHHs)	ENSG00000132530	XAF1
371	1 (PHHs)	ENSG00000132541	RIDA
372	1 (PHHs)	ENSG00000132561	MATN2
373	1 (PHHs)	ENSG00000132693	CRP
374	1 (PHHs)	ENSG00000132703	APCS
375	1 (PHHs)	ENSG00000132744	ACY3
376	1 (PHHs)	ENSG00000132763	MMACHC
377	1 (PHHs)	ENSG00000132837	DMGDH
378	1 (PHHs)	ENSG00000132840	BHMT2
379	1 (PHHs)	ENSG00000132855	ANGPTL3
380	1 (PHHs)	ENSG00000133027	PEMT
381	1 (PHHs)	ENSG00000133048	CHI3L1
382	1 (PHHs)	ENSG00000133121	STARD13
383	1 (PHHs)	ENSG00000133488	SEC14L4
384	1 (PHHs)	ENSG00000134070	IRAK2
385	1 (PHHs)	ENSG00000134072	CAMK1
386	1 (PHHs)	ENSG00000134184	GSTM1
387	1 (PHHs)	ENSG00000134240	HMGCS2
388	1 (PHHs)	ENSG00000134363	FST
389	1 (PHHs)	ENSG00000134365	CFHR4
390	1 (PHHs)	ENSG00000134389	CFHR5
391	1 (PHHs)	ENSG00000134463	ECHDC3
392	1 (PHHs)	ENSG00000134508	CABLES1
393	1 (PHHs)	ENSG00000134532	SOX5
394	1 (PHHs)	ENSG00000134538	SLCO1B1
395	1 (PHHs)	ENSG00000134612	FOLH1B
396	1 (PHHs)	ENSG00000134716	CYP2J2
397	1 (PHHs)	ENSG00000134760	DSG1
398	1 (PHHs)	ENSG00000134802	SLC43A3
399	1 (PHHs)	ENSG00000135094	SDS
400	1 (PHHs)	ENSG00000135144	DTX1
401	1 (PHHs)	ENSG00000135272	MDFIC
402	1 (PHHs)	ENSG00000135318	NT5E
403	1 (PHHs)	ENSG00000135423	GLS2
404	1 (PHHs)	ENSG00000135437	RDH5
405	1 (PHHs)	ENSG00000135447	PPP1R1A
406	1 (PHHs)	ENSG00000135636	DYSF
407	1 (PHHs)	ENSG00000135838	NPL
408	1 (PHHs)	ENSG00000135929	CYP27A1
409	1 (PHHs)	ENSG00000136052	SLC41A2
410	1 (PHHs)	ENSG00000136235	GPNMB
411	1 (PHHs)	ENSG00000136237	RAPGEF5
412	1 (PHHs)	ENSG00000136305	CIDEB
413	1 (PHHs)	ENSG00000136457	CHAD
414	1 (PHHs)	ENSG00000136689	IL1RN
415	1 (PHHs)	ENSG00000136783	NIPSNAP3A
416	1 (PHHs)	ENSG00000136842	TMOD1
417	1 (PHHs)	ENSG00000136881	BAAT
418	1 (PHHs)	ENSG00000136895	GARNL3
419	1 (PHHs)	ENSG00000137106	GRHPR
420	1 (PHHs)	ENSG00000137124	ALDH1B1
421	1 (PHHs)	ENSG00000137133	HINT2
422	1 (PHHs)	ENSG00000137204	SLC22A7
423	1 (PHHs)	ENSG00000137364	TPMT
424	1 (PHHs)	ENSG00000137393	RNF144B
425	1 (PHHs)	ENSG00000137561	TTPA
426	1 (PHHs)	ENSG00000137563	GGH
427	1 (PHHs)	ENSG00000137642	SORL1
428	1 (PHHs)	ENSG00000137752	CASP1
429	1 (PHHs)	ENSG00000137965	IFI44
430	1 (PHHs)	ENSG00000138030	KHK
431	1 (PHHs)	ENSG00000138075	ABCG5
432	1 (PHHs)	ENSG00000138079	SLC3A1
433	1 (PHHs)	ENSG00000138109	CYP2C9
434	1 (PHHs)	ENSG00000138115	CYP2C8
435	1 (PHHs)	ENSG00000138207	RBP4
436	1 (PHHs)	ENSG00000138315	OIT3
437	1 (PHHs)	ENSG00000138356	AOX1
438	1 (PHHs)	ENSG00000138640	FAM13A
439	1 (PHHs)	ENSG00000138670	RASGEF1B
440	1 (PHHs)	ENSG00000138678	GPAT3
441	1 (PHHs)	ENSG00000138792	ENPEP
442	1 (PHHs)	ENSG00000138823	MTTP
443	1 (PHHs)	ENSG00000139144	PIK3C2G
444	1 (PHHs)	ENSG00000139178	C1RL
445	1 (PHHs)	ENSG00000139192	TAPBPL
446	1 (PHHs)	ENSG00000139194	RBP5
447	1 (PHHs)	ENSG00000139209	SLC38A4
448	1 (PHHs)	ENSG00000139269	INHBE
449	1 (PHHs)	ENSG00000139278	GLIPR1
450	1 (PHHs)	ENSG00000139344	AMDHD1
451	1 (PHHs)	ENSG00000139370	SLC15A4
452	1 (PHHs)	ENSG00000139410	SDSL
453	1 (PHHs)	ENSG00000139508	SLC46A3
454	1 (PHHs)	ENSG00000139540	SLC39A5
455	1 (PHHs)	ENSG00000139547	RDH16
456	1 (PHHs)	ENSG00000139597	N4BP2L1
457	1 (PHHs)	ENSG00000139874	SSTR1
458	1 (PHHs)	ENSG00000140093	SERPINA10
459	1 (PHHs)	ENSG00000140107	SLC25A47
460	1 (PHHs)	ENSG00000140280	LYSMD2
461	1 (PHHs)	ENSG00000140284	SLC27A2
462	1 (PHHs)	ENSG00000140470	ADAMTS17
463	1 (PHHs)	ENSG00000140505	CYP1A2
464	1 (PHHs)	ENSG00000140526	ABHD2
465	1 (PHHs)	ENSG00000140678	ITGAX
466	1 (PHHs)	ENSG00000140876	NUDT7
467	1 (PHHs)	ENSG00000140961	OSGIN1
468	1 (PHHs)	ENSG00000140968	IRF8
469	1 (PHHs)	ENSG00000141293	SKAP1
470	1 (PHHs)	ENSG00000141338	ABCA8
471	1 (PHHs)	ENSG00000141505	ASGR1
472	1 (PHHs)	ENSG00000142166	IFNAR1
473	1 (PHHs)	ENSG00000142168	SOD1
474	1 (PHHs)	ENSG00000142494	SLC47A1
475	1 (PHHs)	ENSG00000142748	FCN3
476	1 (PHHs)	ENSG00000143149	ALDH9A1
477	1 (PHHs)	ENSG00000143162	CREG1
478	1 (PHHs)	ENSG00000143257	NR1I3
479	1 (PHHs)	ENSG00000143314	MRPL24
480	1 (PHHs)	ENSG00000143365	RORC
481	1 (PHHs)	ENSG00000143416	SELENBP1
482	1 (PHHs)	ENSG00000143507	DUSP10
483	1 (PHHs)	ENSG00000143627	PKLR
484	1 (PHHs)	ENSG00000143653	SCCPDH
485	1 (PHHs)	ENSG00000143819	EPHX1
486	1 (PHHs)	ENSG00000143845	ETNK2
487	1 (PHHs)	ENSG00000143869	GDF7
488	1 (PHHs)	ENSG00000143878	RHOB
489	1 (PHHs)	ENSG00000143921	ABCG8
490	1 (PHHs)	ENSG00000144035	NAT8
491	1 (PHHs)	ENSG00000144331	ZNF385B
492	1 (PHHs)	ENSG00000144481	TRPM8
493	1 (PHHs)	ENSG00000144649	GASK1A
494	1 (PHHs)	ENSG00000144820	ADGRG7
495	1 (PHHs)	ENSG00000144852	NR1I2
496	1 (PHHs)	ENSG00000144891	AGTR1
497	1 (PHHs)	ENSG00000144908	ALDH1L1
498	1 (PHHs)	ENSG00000145022	TCTA
499	1 (PHHs)	ENSG00000145192	AHSG
500	1 (PHHs)	ENSG00000145247	OCIAD2
501	1 (PHHs)	ENSG00000145321	GC
502	1 (PHHs)	ENSG00000145476	CYP4V2
503	1 (PHHs)	ENSG00000145626	UGT3A1
504	1 (PHHs)	ENSG00000145675	PIK3R1
505	1 (PHHs)	ENSG00000145692	BHMT
506	1 (PHHs)	ENSG00000145703	IQGAP2
507	1 (PHHs)	ENSG00000145708	CRHBP
508	1 (PHHs)	ENSG00000145826	LECT2
509	1 (PHHs)	ENSG00000145934	TENM2
510	1 (PHHs)	ENSG00000146039	SLC17A4
511	1 (PHHs)	ENSG00000146085	MMUT
512	1 (PHHs)	ENSG00000146147	MLIP
513	1 (PHHs)	ENSG00000146233	CYP39A1
514	1 (PHHs)	ENSG00000146477	SLC22A3
515	1 (PHHs)	ENSG00000146678	IGFBP1
516	1 (PHHs)	ENSG00000146833	TRIM4
517	1 (PHHs)	ENSG00000147003	CLTRN
518	1 (PHHs)	ENSG00000147027	TMEM47
519	1 (PHHs)	ENSG00000147573	TRIM55
520	1 (PHHs)	ENSG00000147576	ADHFE1
521	1 (PHHs)	ENSG00000147592	LACTB2
522	1 (PHHs)	ENSG00000147642	SYBU
523	1 (PHHs)	ENSG00000147647	DPYS
524	1 (PHHs)	ENSG00000147862	NFIB
525	1 (PHHs)	ENSG00000148057	IDNK
526	1 (PHHs)	ENSG00000148346	LCN2
527	1 (PHHs)	ENSG00000148516	ZEB1
528	1 (PHHs)	ENSG00000148671	ADIRF
529	1 (PHHs)	ENSG00000148803	FUOM
530	1 (PHHs)	ENSG00000148935	GAS2
531	1 (PHHs)	ENSG00000149124	GLYAT
532	1 (PHHs)	ENSG00000149131	SERPING1
533	1 (PHHs)	ENSG00000149150	SLC43A1
534	1 (PHHs)	ENSG00000150656	CNDP1
535	1 (PHHs)	ENSG00000150782	IL18
536	1 (PHHs)	ENSG00000151224	MAT1A
537	1 (PHHs)	ENSG00000151365	THRSP
538	1 (PHHs)	ENSG00000151491	EPS8
539	1 (PHHs)	ENSG00000151552	QDPR
540	1 (PHHs)	ENSG00000151632	AKR1C2
541	1 (PHHs)	ENSG00000151655	ITIH2
542	1 (PHHs)	ENSG00000151689	INPP1
543	1 (PHHs)	ENSG00000151726	ACSL1
544	1 (PHHs)	ENSG00000151790	TDO2
545	1 (PHHs)	ENSG00000151882	CCL28
546	1 (PHHs)	ENSG00000151892	GFRA1
547	1 (PHHs)	ENSG00000151948	GLT1D1
548	1 (PHHs)	ENSG00000152078	TMEM56
549	1 (PHHs)	ENSG00000152270	PDE3B
550	1 (PHHs)	ENSG00000152558	TMEM123
551	1 (PHHs)	ENSG00000152620	NADK2
552	1 (PHHs)	ENSG00000152804	HHEX
553	1 (PHHs)	ENSG00000153029	MR1
554	1 (PHHs)	ENSG00000153086	ACMSD
555	1 (PHHs)	ENSG00000153234	NR4A2
556	1 (PHHs)	ENSG00000153714	LURAP1L
557	1 (PHHs)	ENSG00000153721	CNKSR3
558	1 (PHHs)	ENSG00000153814	JAZF1
559	1 (PHHs)	ENSG00000153904	DDAH1
560	1 (PHHs)	ENSG00000154099	DNAAF1
561	1 (PHHs)	ENSG00000154153	RETREG1
562	1 (PHHs)	ENSG00000154258	ABCA9
563	1 (PHHs)	ENSG00000154262	ABCA6
564	1 (PHHs)	ENSG00000154263	ABCA10
565	1 (PHHs)	ENSG00000154265	ABCA5
566	1 (PHHs)	ENSG00000154556	SORBS2
567	1 (PHHs)	ENSG00000154655	L3MBTL4
568	1 (PHHs)	ENSG00000154822	PLCL2
569	1 (PHHs)	ENSG00000155659	VSIG4
570	1 (PHHs)	ENSG00000155666	KDM8
571	1 (PHHs)	ENSG00000155849	ELMO1
572	1 (PHHs)	ENSG00000155970	MICU3
573	1 (PHHs)	ENSG00000156006	NAT2
574	1 (PHHs)	ENSG00000156096	UGT2B4
575	1 (PHHs)	ENSG00000156113	KCNMA1
576	1 (PHHs)	ENSG00000156218	ADAMTSL3
577	1 (PHHs)	ENSG00000156222	SLC28A1
578	1 (PHHs)	ENSG00000156253	RWDD2B
579	1 (PHHs)	ENSG00000156398	SFXN2
580	1 (PHHs)	ENSG00000156413	FUT6
581	1 (PHHs)	ENSG00000157087	ATP2B2
582	1 (PHHs)	ENSG00000157103	SLC6A1
583	1 (PHHs)	ENSG00000157131	C8A
584	1 (PHHs)	ENSG00000157168	NRG1
585	1 (PHHs)	ENSG00000157326	DHRS4
586	1 (PHHs)	ENSG00000157379	DHRS1
587	1 (PHHs)	ENSG00000157399	ARSE
588	1 (PHHs)	ENSG00000157654	PALM2-AKAP2
589	1 (PHHs)	ENSG00000158104	HPD
590	1 (PHHs)	ENSG00000158125	XDH
591	1 (PHHs)	ENSG00000158473	CD1D
592	1 (PHHs)	ENSG00000158571	PFKFB1
593	1 (PHHs)	ENSG00000158869	FCER1G
594	1 (PHHs)	ENSG00000158874	APOA2
595	1 (PHHs)	ENSG00000159189	C1QC
596	1 (PHHs)	ENSG00000159403	C1R
597	1 (PHHs)	ENSG00000159423	ALDH4A1
598	1 (PHHs)	ENSG00000159650	UROC1
599	1 (PHHs)	ENSG00000159674	SPON2
600	1 (PHHs)	ENSG00000159921	GNE
601	1 (PHHs)	ENSG00000160097	FNDC5
602	1 (PHHs)	ENSG00000160255	ITGB2
603	1 (PHHs)	ENSG00000160282	FTCD
604	1 (PHHs)	ENSG00000160339	FCN2
605	1 (PHHs)	ENSG00000160862	AZGP1
606	1 (PHHs)	ENSG00000160868	CYP3A4
607	1 (PHHs)	ENSG00000161031	PGLYRP2
608	1 (PHHs)	ENSG00000161267	BDH1
609	1 (PHHs)	ENSG00000161653	NAGS
610	1 (PHHs)	ENSG00000162267	ITIH3
611	1 (PHHs)	ENSG00000162365	CYP4A22
612	1 (PHHs)	ENSG00000162391	FAM151A
613	1 (PHHs)	ENSG00000162460	TMEM82
614	1 (PHHs)	ENSG00000162482	AKR7A3
615	1 (PHHs)	ENSG00000162599	NFIA
616	1 (PHHs)	ENSG00000162623	TYW3
617	1 (PHHs)	ENSG00000162654	GBP4
618	1 (PHHs)	ENSG00000162772	ATF3
619	1 (PHHs)	ENSG00000162804	SNED1
620	1 (PHHs)	ENSG00000162882	HAAO
621	1 (PHHs)	ENSG00000162896	PIGR
622	1 (PHHs)	ENSG00000163050	COQ8A
623	1 (PHHs)	ENSG00000163131	CTSS
624	1 (PHHs)	ENSG00000163581	SLC2A2
625	1 (PHHs)	ENSG00000163631	ALB
626	1 (PHHs)	ENSG00000163686	ABHD6
627	1 (PHHs)	ENSG00000163687	DNASE1L3
628	1 (PHHs)	ENSG00000163710	PCOLCE2
629	1 (PHHs)	ENSG00000163739	CXCL1
630	1 (PHHs)	ENSG00000163825	RTP3
631	1 (PHHs)	ENSG00000163884	KLF15
632	1 (PHHs)	ENSG00000163959	SLC51A
633	1 (PHHs)	ENSG00000164038	SLC9B2
634	1 (PHHs)	ENSG00000164070	HSPA4L
635	1 (PHHs)	ENSG00000164089	ETNPPL
636	1 (PHHs)	ENSG00000164120	HPGD
637	1 (PHHs)	ENSG00000164237	CMBL
638	1 (PHHs)	ENSG00000164308	ERAP2
639	1 (PHHs)	ENSG00000164342	TLR3
640	1 (PHHs)	ENSG00000164344	KLKB1
641	1 (PHHs)	ENSG00000164406	LEAP2
642	1 (PHHs)	ENSG00000164690	SHH
643	1 (PHHs)	ENSG00000164749	HNF4G
644	1 (PHHs)	ENSG00000164849	GPR146
645	1 (PHHs)	ENSG00000164850	GPER1
646	1 (PHHs)	ENSG00000164855	TMEM184A
647	1 (PHHs)	ENSG00000165092	ALDH1A1
648	1 (PHHs)	ENSG00000165140	FBP1
649	1 (PHHs)	ENSG00000165244	ZNF367
650	1 (PHHs)	ENSG00000165269	AQP7
651	1 (PHHs)	ENSG00000165376	CLDN2
652	1 (PHHs)	ENSG00000165410	CFL2
653	1 (PHHs)	ENSG00000165424	ZCCHC24
654	1 (PHHs)	ENSG00000165475	CRYL1
655	1 (PHHs)	ENSG00000165478	HEPACAM
656	1 (PHHs)	ENSG00000165507	DEPP1
657	1 (PHHs)	ENSG00000165633	VSTM4
658	1 (PHHs)	ENSG00000165795	NDRG2
659	1 (PHHs)	ENSG00000165828	PRAP1
660	1 (PHHs)	ENSG00000165841	CYP2C19
661	1 (PHHs)	ENSG00000165959	CLMN
662	1 (PHHs)	ENSG00000166033	HTRA1
663	1 (PHHs)	ENSG00000166148	AVPR1A
664	1 (PHHs)	ENSG00000166183	ASPG
665	1 (PHHs)	ENSG00000166228	PCBD1
666	1 (PHHs)	ENSG00000166275	BORCS7
667	1 (PHHs)	ENSG00000166278	C2
668	1 (PHHs)	ENSG00000166347	CYB5A
669	1 (PHHs)	ENSG00000166391	MOGAT2
670	1 (PHHs)	ENSG00000166401	SERPINB8
671	1 (PHHs)	ENSG00000166415	WDR72
672	1 (PHHs)	ENSG00000166432	ZMAT1
673	1 (PHHs)	ENSG00000166710	B2M
674	1 (PHHs)	ENSG00000166816	LDHD
675	1 (PHHs)	ENSG00000166819	PLIN1
676	1 (PHHs)	ENSG00000166825	ANPEP
677	1 (PHHs)	ENSG00000166840	GLYATL1
678	1 (PHHs)	ENSG00000166920	C15orf48
679	1 (PHHs)	ENSG00000166927	MS4A7
680	1 (PHHs)	ENSG00000167165	UGT1A6
681	1 (PHHs)	ENSG00000167315	ACAA2
682	1 (PHHs)	ENSG00000167588	GPD1
683	1 (PHHs)	ENSG00000167676	PLIN4
684	1 (PHHs)	ENSG00000167701	GPT
685	1 (PHHs)	ENSG00000167767	KRT80
686	1 (PHHs)	ENSG00000167785	ZNF558
687	1 (PHHs)	ENSG00000167798	C3P1
688	1 (PHHs)	ENSG00000167910	CYP7A1
689	1 (PHHs)	ENSG00000168237	GLYCTK
690	1 (PHHs)	ENSG00000168306	ACOX2
691	1 (PHHs)	ENSG00000168389	MFSD2A
692	1 (PHHs)	ENSG00000168509	HJV
693	1 (PHHs)	ENSG00000168675	LDLRAD4
694	1 (PHHs)	ENSG00000168874	ATOH8
695	1 (PHHs)	ENSG00000169083	AR
696	1 (PHHs)	ENSG00000169136	ATF5
697	1 (PHHs)	ENSG00000169252	ADRB2
698	1 (PHHs)	ENSG00000169291	SHE
699	1 (PHHs)	ENSG00000169432	SCN9A
700	1 (PHHs)	ENSG00000169562	GJB1
701	1 (PHHs)	ENSG00000169715	MT1E
702	1 (PHHs)	ENSG00000169738	DCXR
703	1 (PHHs)	ENSG00000169762	TAPT1
704	1 (PHHs)	ENSG00000169891	REPS2
705	1 (PHHs)	ENSG00000170011	MYRIP
706	1 (PHHs)	ENSG00000170099	SERPINA6
707	1 (PHHs)	ENSG00000170271	FAXDC2
708	1 (PHHs)	ENSG00000170345	FOS
709	1 (PHHs)	ENSG00000170439	METTL7B
710	1 (PHHs)	ENSG00000170458	CD14
711	1 (PHHs)	ENSG00000170485	NPAS2
712	1 (PHHs)	ENSG00000170509	HSD17B13
713	1 (PHHs)	ENSG00000170917	NUDT6
714	1 (PHHs)	ENSG00000170989	S1PR1
715	1 (PHHs)	ENSG00000171174	RBKS
716	1 (PHHs)	ENSG00000171234	UGT2B7
717	1 (PHHs)	ENSG00000171236	LRG1
718	1 (PHHs)	ENSG00000171368	TPPP
719	1 (PHHs)	ENSG00000171385	KCND3
720	1 (PHHs)	ENSG00000171444	MCC
721	1 (PHHs)	ENSG00000171503	ETFDH
722	1 (PHHs)	ENSG00000171723	GPHN
723	1 (PHHs)	ENSG00000171747	LGALS4
724	1 (PHHs)	ENSG00000171759	PAH
725	1 (PHHs)	ENSG00000171766	GATM
726	1 (PHHs)	ENSG00000171903	CYP4F11
727	1 (PHHs)	ENSG00000172345	STARD5
728	1 (PHHs)	ENSG00000172425	TTC36
729	1 (PHHs)	ENSG00000172456	FGGY
730	1 (PHHs)	ENSG00000172482	AGXT
731	1 (PHHs)	ENSG00000172497	ACOT12
732	1 (PHHs)	ENSG00000172765	TMCC1
733	1 (PHHs)	ENSG00000172817	CYP7B1
734	1 (PHHs)	ENSG00000172824	CES4A
735	1 (PHHs)	ENSG00000172828	CES3
736	1 (PHHs)	ENSG00000172831	CES2
737	1 (PHHs)	ENSG00000172878	METAP1D
738	1 (PHHs)	ENSG00000172955	ADH6
739	1 (PHHs)	ENSG00000173041	ZNF680
740	1 (PHHs)	ENSG00000173166	RAPH1
741	1 (PHHs)	ENSG00000173198	CYSLTR1
742	1 (PHHs)	ENSG00000173210	ABLIM3
743	1 (PHHs)	ENSG00000173227	SYT12
744	1 (PHHs)	ENSG00000173369	C1QB
745	1 (PHHs)	ENSG00000173372	C1QA
746	1 (PHHs)	ENSG00000173597	SULT1B1
747	1 (PHHs)	ENSG00000174080	CTSF
748	1 (PHHs)	ENSG00000174564	IL20RB
749	1 (PHHs)	ENSG00000175003	SLC22A1
750	1 (PHHs)	ENSG00000175189	INHBC
751	1 (PHHs)	ENSG00000175287	PHYHD1
752	1 (PHHs)	ENSG00000175336	APOF
753	1 (PHHs)	ENSG00000175556	LONRF3
754	1 (PHHs)	ENSG00000175600	SUGCT
755	1 (PHHs)	ENSG00000176153	GPX2
756	1 (PHHs)	ENSG00000176422	SPRYD4
757	1 (PHHs)	ENSG00000176595	KBTBD11
758	1 (PHHs)	ENSG00000176894	PXMP2
759	1 (PHHs)	ENSG00000176907	TCIM
760	1 (PHHs)	ENSG00000176919	C8G
761	1 (PHHs)	ENSG00000176945	MUC20
762	1 (PHHs)	ENSG00000176974	SHMT1
763	1 (PHHs)	ENSG00000177459	ERICH5
764	1 (PHHs)	ENSG00000177465	ACOT4
765	1 (PHHs)	ENSG00000177575	CD163
766	1 (PHHs)	ENSG00000177606	JUN
767	1 (PHHs)	ENSG00000178075	GRAMD1C
768	1 (PHHs)	ENSG00000178301	AQP11
769	1 (PHHs)	ENSG00000178401	DNAJC22
770	1 (PHHs)	ENSG00000178537	SLC25A20
771	1 (PHHs)	ENSG00000178700	DHFR2
772	1 (PHHs)	ENSG00000178772	CPN2
773	1 (PHHs)	ENSG00000178826	TMEM139
774	1 (PHHs)	ENSG00000179761	PIPOX
775	1 (PHHs)	ENSG00000179862	CITED4
776	1 (PHHs)	ENSG00000179918	SEPHS2
777	1 (PHHs)	ENSG00000180011	ZADH2
778	1 (PHHs)	ENSG00000180210	F2
779	1 (PHHs)	ENSG00000180353	HCLS1
780	1 (PHHs)	ENSG00000180425	C11orf71
781	1 (PHHs)	ENSG00000180432	CYP8B1
782	1 (PHHs)	ENSG00000180525	PRR26
783	1 (PHHs)	ENSG00000180745	CLRN3
784	1 (PHHs)	ENSG00000180875	GREM2
785	1 (PHHs)	ENSG00000181192	DHTKD1
786	1 (PHHs)	ENSG00000181458	TMEM45A
787	1 (PHHs)	ENSG00000181656	GPR88
788	1 (PHHs)	ENSG00000182326	C1S
789	1 (PHHs)	ENSG00000182463	TSHZ2
790	1 (PHHs)	ENSG00000182551	ADI1
791	1 (PHHs)	ENSG00000182809	CRIP2
792	1 (PHHs)	ENSG00000182902	SLC25A18
793	1 (PHHs)	ENSG00000182983	ZNF662
794	1 (PHHs)	ENSG00000183018	SPNS2
795	1 (PHHs)	ENSG00000183044	ABAT
796	1 (PHHs)	ENSG00000183049	CAMK1D
797	1 (PHHs)	ENSG00000183091	NEB
798	1 (PHHs)	ENSG00000183230	CTNNA3
799	1 (PHHs)	ENSG00000183281	PLGLB1
800	1 (PHHs)	ENSG00000183323	CCDC125
801	1 (PHHs)	ENSG00000183549	ACSM5
802	1 (PHHs)	ENSG00000183971	NPW
803	1 (PHHs)	ENSG00000184227	ACOT1
804	1 (PHHs)	ENSG00000184470	TXNRD2
805	1 (PHHs)	ENSG00000184860	SDR42E1
806	1 (PHHs)	ENSG00000184999	SLC22A10
807	1 (PHHs)	ENSG00000185010	F8
808	1 (PHHs)	ENSG00000185432	METTL7A
809	1 (PHHs)	ENSG00000185633	NDUFA4L2
810	1 (PHHs)	ENSG00000185745	IFIT1
811	1 (PHHs)	ENSG00000185875	THNSL1
812	1 (PHHs)	ENSG00000186088	GSAP
813	1 (PHHs)	ENSG00000186115	CYP4F2
814	1 (PHHs)	ENSG00000186204	CYP4F12
815	1 (PHHs)	ENSG00000186205	2001-03-01
816	1 (PHHs)	ENSG00000186329	TMEM212
817	1 (PHHs)	ENSG00000186352	ANKRD37
818	1 (PHHs)	ENSG00000186480	INSIG1
819	1 (PHHs)	ENSG00000186529	CYP4F3
820	1 (PHHs)	ENSG00000186715	MST1L
821	1 (PHHs)	ENSG00000186732	MPPED1
822	1 (PHHs)	ENSG00000186910	SERPINA11
823	1 (PHHs)	ENSG00000187048	CYP4A11
824	1 (PHHs)	ENSG00000187097	ENTPD5
825	1 (PHHs)	ENSG00000187134	AKR1C1
826	1 (PHHs)	ENSG00000187193	MT1X
827	1 (PHHs)	ENSG00000187479	C11orf96
828	1 (PHHs)	ENSG00000187546	AGMO
829	1 (PHHs)	ENSG00000187630	DHRS4L2
830	1 (PHHs)	ENSG00000187758	ADH1A
831	1 (PHHs)	ENSG00000187824	TMEM220
832	1 (PHHs)	ENSG00000187889	FYB2
833	1 (PHHs)	ENSG00000188001	TPRG1
834	1 (PHHs)	ENSG00000188257	PLA2G2A
835	1 (PHHs)	ENSG00000188582	PAQR9
836	1 (PHHs)	ENSG00000188641	DPYD
837	1 (PHHs)	ENSG00000188676	IDO2
838	1 (PHHs)	ENSG00000188833	ENTPD8
839	1 (PHHs)	ENSG00000188906	LRRK2
840	1 (PHHs)	ENSG00000188933	USP32P1
841	1 (PHHs)	ENSG00000188958	UTS2B
842	1 (PHHs)	ENSG00000189056	RELN
843	1 (PHHs)	ENSG00000189221	MAOA
844	1 (PHHs)	ENSG00000189233	NUGGC
845	1 (PHHs)	ENSG00000196139	AKR1C3
846	1 (PHHs)	ENSG00000196177	ACADSB
847	1 (PHHs)	ENSG00000196549	MME
848	1 (PHHs)	ENSG00000196600	SLC22A25
849	1 (PHHs)	ENSG00000196616	ADH1B
850	1 (PHHs)	ENSG00000196620	UGT2B15
851	1 (PHHs)	ENSG00000196660	SLC30A10
852	1 (PHHs)	ENSG00000196735	HLA-DQA1
853	1 (PHHs)	ENSG00000196843	ARID5A
854	1 (PHHs)	ENSG00000197013	ZNF429
855	1 (PHHs)	ENSG00000197408	CYP2B6
856	1 (PHHs)	ENSG00000197442	MAP3K5
857	1 (PHHs)	ENSG00000197444	OGDHL
858	1 (PHHs)	ENSG00000197580	BCO2
859	1 (PHHs)	ENSG00000197629	MPEG1
860	1 (PHHs)	ENSG00000197888	UGT2B17
861	1 (PHHs)	ENSG00000197943	PLCG2
862	1 (PHHs)	ENSG00000198074	AKR1B10
863	1 (PHHs)	ENSG00000198077	CYP2A7
864	1 (PHHs)	ENSG00000198099	ADH4
865	1 (PHHs)	ENSG00000198189	HSD17B11
866	1 (PHHs)	ENSG00000198417	MT1F
867	1 (PHHs)	ENSG00000198515	CNGA1
868	1 (PHHs)	ENSG00000198610	AKR1C4
869	1 (PHHs)	ENSG00000198650	TAT
870	1 (PHHs)	ENSG00000198670	LPA
871	1 (PHHs)	ENSG00000198727	CYTB
872	1 (PHHs)	ENSG00000198732	SMOC1
873	1 (PHHs)	ENSG00000198734	F5
874	1 (PHHs)	ENSG00000198763	ND2
875	1 (PHHs)	ENSG00000198804	COX1
876	1 (PHHs)	ENSG00000198814	GK
877	1 (PHHs)	ENSG00000198840	ND3
878	1 (PHHs)	ENSG00000198848	CES1
879	1 (PHHs)	ENSG00000198865	CCDC152
880	1 (PHHs)	ENSG00000198886	ND4
881	1 (PHHs)	ENSG00000198888	ND1
882	1 (PHHs)	ENSG00000198899	ATP6
883	1 (PHHs)	ENSG00000198938	COX3
884	1 (PHHs)	ENSG00000198947	DMD
885	1 (PHHs)	ENSG00000203727	SAMD5
886	1 (PHHs)	ENSG00000203747	FCGR3A
887	1 (PHHs)	ENSG00000203797	DDO
888	1 (PHHs)	ENSG00000203896	LIME1
889	1 (PHHs)	ENSG00000204099	NEU4
890	1 (PHHs)	ENSG00000204103	MAFB
891	1 (PHHs)	ENSG00000204172	AGAP9
892	1 (PHHs)	ENSG00000204219	TCEA3
893	1 (PHHs)	ENSG00000204228	HSD17B8
894	1 (PHHs)	ENSG00000204359	CFB
895	1 (PHHs)	ENSG00000204364	C2
896	1 (PHHs)	ENSG00000204653	ASPDH
897	1 (PHHs)	ENSG00000205358	MT1H
898	1 (PHHs)	ENSG00000205362	MT1A
899	1 (PHHs)	ENSG00000205364	MT1M
900	1 (PHHs)	ENSG00000205413	SAMD9
901	1 (PHHs)	ENSG00000205436	EXOC3L4
902	1 (PHHs)	ENSG00000205683	DPF3
903	1 (PHHs)	ENSG00000205707	ETFRF1
904	1 (PHHs)	ENSG00000206240	HLA-DRB1
905	1 (PHHs)	ENSG00000206281	TAPBP
906	1 (PHHs)	ENSG00000206435	HLA-C
907	1 (PHHs)	ENSG00000211454	AKR7L
908	1 (PHHs)	ENSG00000211592	NA
909	1 (PHHs)	ENSG00000211632	NA
910	1 (PHHs)	ENSG00000211895	NA
911	1 (PHHs)	ENSG00000211896	NA
912	1 (PHHs)	ENSG00000212866	HSPA1B
913	1 (PHHs)	ENSG00000213071	LPAL2
914	1 (PHHs)	ENSG00000213398	LCAT
915	1 (PHHs)	ENSG00000213512	GBP7
916	1 (PHHs)	ENSG00000214274	ANG
917	1 (PHHs)	ENSG00000214313	AZGP1P1
918	1 (PHHs)	ENSG00000214456	PLIN5
919	1 (PHHs)	ENSG00000214827	MTCP1
920	1 (PHHs)	ENSG00000214855	APOC1P1
921	1 (PHHs)	ENSG00000214856	NA
922	1 (PHHs)	ENSG00000215030	NA
923	1 (PHHs)	ENSG00000215644	GCGR
924	1 (PHHs)	ENSG00000216490	IFI30
925	1 (PHHs)	ENSG00000216588	IGSF23
926	1 (PHHs)	ENSG00000219607	PPP1R3G
927	1 (PHHs)	ENSG00000221947	XKR9
928	1 (PHHs)	ENSG00000221995	TIAF1
929	1 (PHHs)	ENSG00000223767	RNF5
930	1 (PHHs)	ENSG00000224389	C4B
931	1 (PHHs)	ENSG00000224916	NA
932	1 (PHHs)	ENSG00000225630	NA
933	1 (PHHs)	ENSG00000225972	NA
934	1 (PHHs)	ENSG00000226015	NA
935	1 (PHHs)	ENSG00000226260	HLA-DRA
936	1 (PHHs)	ENSG00000226964	NA
937	1 (PHHs)	ENSG00000227567	APOM
938	1 (PHHs)	ENSG00000227746	C4A
939	1 (PHHs)	ENSG00000228253	ATP8
940	1 (PHHs)	ENSG00000228267	C4B
941	1 (PHHs)	ENSG00000228278	ORM2
942	1 (PHHs)	ENSG00000228357	HSD17B8
943	1 (PHHs)	ENSG00000228964	HLA-B
944	1 (PHHs)	ENSG00000229074	HLA-DRB1
945	1 (PHHs)	ENSG00000229314	ORM1
946	1 (PHHs)	ENSG00000230882	NA
947	1 (PHHs)	ENSG00000231543	C2
948	1 (PHHs)	ENSG00000231555	HSPA1B
949	1 (PHHs)	ENSG00000231834	HLA-A
950	1 (PHHs)	ENSG00000231968	UBD
951	1 (PHHs)	ENSG00000232196	MTRNR2L4
952	1 (PHHs)	ENSG00000233312	C4B_2
953	1 (PHHs)	ENSG00000233377	NA
954	1 (PHHs)	ENSG00000234745	HLA-B
955	1 (PHHs)	ENSG00000234794	HLA-DRA
956	1 (PHHs)	ENSG00000234906	APOC2
957	1 (PHHs)	ENSG00000235696	C2
958	1 (PHHs)	ENSG00000235844	HLA-DPA1
959	1 (PHHs)	ENSG00000235941	HSPA1A
960	1 (PHHs)	ENSG00000236443	PSMB8
961	1 (PHHs)	ENSG00000236490	TAPBP
962	1 (PHHs)	ENSG00000237022	HLA-C
963	1 (PHHs)	ENSG00000239836	PSMB9
964	1 (PHHs)	ENSG00000239887	C1orf226
965	1 (PHHs)	ENSG00000240038	AMY2B
966	1 (PHHs)	ENSG00000240935	PLGLA
967	1 (PHHs)	ENSG00000241058	NSUN6
968	1 (PHHs)	ENSG00000241119	UGT1A9
969	1 (PHHs)	ENSG00000241351	NA
970	1 (PHHs)	ENSG00000241399	CD302
971	1 (PHHs)	ENSG00000241534	CFB
972	1 (PHHs)	ENSG00000241935	HOGA1
973	1 (PHHs)	ENSG00000242110	AMACR
974	1 (PHHs)	ENSG00000242193	CRYZL2P
975	1 (PHHs)	ENSG00000243056	EIF4EBP3
976	1 (PHHs)	ENSG00000243135	UGT1A3
977	1 (PHHs)	ENSG00000243444	PALM2
978	1 (PHHs)	ENSG00000243649	CFB
979	1 (PHHs)	ENSG00000243696	NA
980	1 (PHHs)	ENSG00000243710	CFAP57
981	1 (PHHs)	ENSG00000243955	GSTA1
982	1 (PHHs)	ENSG00000243989	ACY1
983	1 (PHHs)	ENSG00000244414	CFHR1
984	1 (PHHs)	ENSG00000244474	UGT1A4
985	1 (PHHs)	ENSG00000244731	C4A
986	1 (PHHs)	ENSG00000248144	ADH1C
987	1 (PHHs)	ENSG00000248527	NA
988	1 (PHHs)	ENSG00000249242	TMEM150C
989	1 (PHHs)	ENSG00000249948	GBA3
990	1 (PHHs)	ENSG00000250722	SELENOP
991	1 (PHHs)	ENSG00000250799	PRODH2
992	1 (PHHs)	ENSG00000251705	NA
993	1 (PHHs)	ENSG00000253525	NA
994	1 (PHHs)	ENSG00000253755	NA
995	1 (PHHs)	ENSG00000255823	MTRNR2L8
996	1 (PHHs)	ENSG00000255974	CYP2A6
997	1 (PHHs)	ENSG00000256043	CTSO
998	1 (PHHs)	ENSG00000256045	MTRNR2L10
999	1 (PHHs)	ENSG00000256612	CYP2B7P
1000	1 (PHHs)	ENSG00000256618	MTRNR2L1
1001	1 (PHHs)	ENSG00000256847	NA
1002	1 (PHHs)	ENSG00000257767	NA
1003	1 (PHHs)	ENSG00000258311	NA
1004	1 (PHHs)	ENSG00000258461	NA
1005	1 (PHHs)	ENSG00000258818	RNASE4
1006	1 (PHHs)	ENSG00000259171	NA
1007	1 (PHHs)	ENSG00000259207	ITGB3
1008	1 (PHHs)	ENSG00000259417	CTXND1
1009	1 (PHHs)	ENSG00000259479	SORD2P
1010	1 (PHHs)	ENSG00000260105	AOC4P
1011	1 (PHHs)	ENSG00000260314	MRC1
1012	1 (PHHs)	ENSG00000260549	MT1L
1013	1 (PHHs)	ENSG00000261371	PECAM1
1014	1 (PHHs)	ENSG00000261701	HPR
1015	1 (PHHs)	ENSG00000262243	CES1
1016	1 (PHHs)	ENSG00000262304	NA
1017	1 (PHHs)	ENSG00000262635	TDO2
1018	1 (PHHs)	ENSG00000262943	ALOX12P2
1019	1 (PHHs)	ENSG00000263181	CYP2D7
1020	1 (PHHs)	ENSG00000265158	NA
1021	1 (PHHs)	ENSG00000266964	FXYD1
1022	1 (PHHs)	ENSG00000266997	NA
1023	1 (PHHs)	ENSG00000267056	NA
1024	1 (PHHs)	ENSG00000267385	NA
1025	1 (PHHs)	ENSG00000267467	APOC4
1026	1 (PHHs)	ENSG00000269028	MTRNR2L2
1027	1 (PHHs)	ENSG00000270188	NA
1028	1 (PHHs)	ENSG00000271699	NA
1029	1 (PHHs)	ENSG00000272532	CYP2D6
1030	1 (PHHs)	ENSG00000273047	NA
1031	1 (PHHs)	ENSG00000273154	NA
1032	1 (PHHs)	ENSG00000273572	CDHR5
1033	1 (PHHs)	ENSG00000273686	B2M
1034	1 (PHHs)	ENSG00000273936	TNFRSF14
1035	1 (PHHs)	ENSG00000275003	DDT
1036	1 (PHHs)	ENSG00000275152	CCL16
1037	1 (PHHs)	ENSG00000275190	UGT2B10
1038	1 (PHHs)	ENSG00000275211	CYP2D6
1039	1 (PHHs)	ENSG00000275331	ABCC6
1040	1 (PHHs)	ENSG00000275528	CCL15
1041	1 (PHHs)	ENSG00000275688	NA
1042	1 (PHHs)	ENSG00000276130	SLC22A18
1043	1 (PHHs)	ENSG00000276497	APBA1
1044	1 (PHHs)	ENSG00000276911	NA
1045	1 (PHHs)	ENSG00000277101	ARHGEF26
1046	1 (PHHs)	ENSG00000277132	UGT2B15
1047	1 (PHHs)	ENSG00000277405	SERPINA6
1048	1 (PHHs)	ENSG00000277893	SRD5A2
1049	1 (PHHs)	ENSG00000281775	FTCD
1050	2 (HLCs)	ENSG00000001626	CFTR
1051	2 (HLCs)	ENSG00000004948	CALCR
1052	2 (HLCs)	ENSG00000005001	PRSS22
1053	2 (HLCs)	ENSG00000005884	ITGA3
1054	2 (HLCs)	ENSG00000006025	OSBPL7
1055	2 (HLCs)	ENSG00000006611	USH1C
1056	2 (HLCs)	ENSG00000007062	PROM1
1057	2 (HLCs)	ENSG00000010310	GIPR
1058	2 (HLCs)	ENSG00000011347	SYT7
1059	2 (HLCs)	ENSG00000013588	GPRC5A
1060	2 (HLCs)	ENSG00000015532	XYLT2
1061	2 (HLCs)	ENSG00000017483	SLC38A5
1062	2 (HLCs)	ENSG00000019549	SNAI2
1063	2 (HLCs)	ENSG00000026508	CD44
1064	2 (HLCs)	ENSG00000041353	RAB27B
1065	2 (HLCs)	ENSG00000041982	TNC
1066	2 (HLCs)	ENSG00000042980	ADAM28
1067	2 (HLCs)	ENSG00000049192	ADAMTS6
1068	2 (HLCs)	ENSG00000050165	DKK3
1069	2 (HLCs)	ENSG00000051523	CYBA
1070	2 (HLCs)	ENSG00000052344	PRSS8
1071	2 (HLCs)	ENSG00000053747	LAMA3
1072	2 (HLCs)	ENSG00000054179	ENTPD2
1073	2 (HLCs)	ENSG00000054690	PLEKHH1
1074	2 (HLCs)	ENSG00000058085	LAMC2
1075	2 (HLCs)	ENSG00000058668	ATP2B4
1076	2 (HLCs)	ENSG00000059145	UNKL
1077	2 (HLCs)	ENSG00000059804	SLC2A3
1078	2 (HLCs)	ENSG00000064687	ABCA7
1079	2 (HLCs)	ENSG00000065717	TLE2
1080	2 (HLCs)	ENSG00000066405	CLDN18
1081	2 (HLCs)	ENSG00000067177	PHKA1
1082	2 (HLCs)	ENSG00000068366	ACSL4
1083	2 (HLCs)	ENSG00000069812	HES2
1084	2 (HLCs)	ENSG00000070019	GUCY2C
1085	2 (HLCs)	ENSG00000070731	ST6GALNAC2
1086	2 (HLCs)	ENSG00000070882	OSBPL3
1087	2 (HLCs)	ENSG00000071073	MGAT4A
1088	2 (HLCs)	ENSG00000071282	LMCD1
1089	2 (HLCs)	ENSG00000073756	PTGS2
1090	2 (HLCs)	ENSG00000076067	RBMS2
1091	2 (HLCs)	ENSG00000077274	CAPN6
1092	2 (HLCs)	ENSG00000077616	NAALAD2
1093	2 (HLCs)	ENSG00000077943	ITGA8
1094	2 (HLCs)	ENSG00000079112	CDH17
1095	2 (HLCs)	ENSG00000081051	AFP
1096	2 (HLCs)	ENSG00000081052	COL4A4
1097	2 (HLCs)	ENSG00000082014	SMARCD3
1098	2 (HLCs)	ENSG00000085831	TTC39A
1099	2 (HLCs)	ENSG00000086544	ITPKC
1100	2 (HLCs)	ENSG00000086548	CEACAM6
1101	2 (HLCs)	ENSG00000087111	PIGS
1102	2 (HLCs)	ENSG00000087303	NID2
1103	2 (HLCs)	ENSG00000088340	FER1L4
1104	2 (HLCs)	ENSG00000089356	FXYD3
1105	2 (HLCs)	ENSG00000090530	P3H2
1106	2 (HLCs)	ENSG00000091129	NRCAM
1107	2 (HLCs)	ENSG00000091136	LAMB1
1108	2 (HLCs)	ENSG00000091986	CCDC80
1109	2 (HLCs)	ENSG00000095383	TBC1D2
1110	2 (HLCs)	ENSG00000096088	PGC
1111	2 (HLCs)	ENSG00000096433	ITPR3
1112	2 (HLCs)	ENSG00000099139	PCSK5
1113	2 (HLCs)	ENSG00000099953	MMP11
1114	2 (HLCs)	ENSG00000100077	GRK3
1115	2 (HLCs)	ENSG00000100196	KDELR3
1116	2 (HLCs)	ENSG00000100285	NEFH
1117	2 (HLCs)	ENSG00000100505	TRIM9
1118	2 (HLCs)	ENSG00000100644	HIF1A
1119	2 (HLCs)	ENSG00000101210	EEF1A2
1120	2 (HLCs)	ENSG00000102034	ELF4
1121	2 (HLCs)	ENSG00000102265	TIMP1
1122	2 (HLCs)	ENSG00000102287	GABRE
1123	2 (HLCs)	ENSG00000102349	KLF8
1124	2 (HLCs)	ENSG00000102359	SRPX2
1125	2 (HLCs)	ENSG00000103647	CORO2B
1126	2 (HLCs)	ENSG00000104081	BMF
1127	2 (HLCs)	ENSG00000105329	TGFB1
1128	2 (HLCs)	ENSG00000105514	RAB3D
1129	2 (HLCs)	ENSG00000105639	JAK3
1130	2 (HLCs)	ENSG00000106541	AGR2
1131	2 (HLCs)	ENSG00000106868	SUSD1
1132	2 (HLCs)	ENSG00000107281	NPDC1
1133	2 (HLCs)	ENSG00000107485	GATA3
1134	2 (HLCs)	ENSG00000107551	RASSF4
1135	2 (HLCs)	ENSG00000107742	SPOCK2
1136	2 (HLCs)	ENSG00000107819	SFXN3
1137	2 (HLCs)	ENSG00000107984	DKK1
1138	2 (HLCs)	ENSG00000108582	CPD
1139	2 (HLCs)	ENSG00000108797	CNTNAP1
1140	2 (HLCs)	ENSG00000109089	CDR2L
1141	2 (HLCs)	ENSG00000109321	AREG
1142	2 (HLCs)	ENSG00000109472	CPE
1143	2 (HLCs)	ENSG00000110237	ARHGEF17
1144	2 (HLCs)	ENSG00000110811	P3H3
1145	2 (HLCs)	ENSG00000111319	SCNN1A
1146	2 (HLCs)	ENSG00000111452	ADGRD1
1147	2 (HLCs)	ENSG00000112782	CLIC5
1148	2 (HLCs)	ENSG00000112796	ENPP5
1149	2 (HLCs)	ENSG00000112818	MEP1A
1150	2 (HLCs)	ENSG00000113083	LOX
1151	2 (HLCs)	ENSG00000113140	SPARC
1152	2 (HLCs)	ENSG00000113209	PCDHB5
1153	2 (HLCs)	ENSG00000113249	HAVCR1
1154	2 (HLCs)	ENSG00000113361	CDH6
1155	2 (HLCs)	ENSG00000113739	STC2
1156	2 (HLCs)	ENSG00000114251	WNT5A
1157	2 (HLCs)	ENSG00000114268	PFKFB4
1158	2 (HLCs)	ENSG00000114270	COL7A1
1159	2 (HLCs)	ENSG00000114529	C3orf52
1160	2 (HLCs)	ENSG00000114638	UPK1B
1161	2 (HLCs)	ENSG00000115221	ITGB6
1162	2 (HLCs)	ENSG00000115295	CLIP4
1163	2 (HLCs)	ENSG00000115339	GALNT3
1164	2 (HLCs)	ENSG00000115380	EFEMP1
1165	2 (HLCs)	ENSG00000115935	WIPF1
1166	2 (HLCs)	ENSG00000116017	ARID3A
1167	2 (HLCs)	ENSG00000116157	GPX7
1168	2 (HLCs)	ENSG00000116183	PAPPA2
1169	2 (HLCs)	ENSG00000116260	QSOX1
1170	2 (HLCs)	ENSG00000116661	FBXO2
1171	2 (HLCs)	ENSG00000116985	BMP8B
1172	2 (HLCs)	ENSG00000117394	SLC2A1
1173	2 (HLCs)	ENSG00000117525	F3
1174	2 (HLCs)	ENSG00000118495	PLAGL1
1175	2 (HLCs)	ENSG00000119227	PIGZ
1176	2 (HLCs)	ENSG00000119681	LTBP2
1177	2 (HLCs)	ENSG00000119888	EPCAM
1178	2 (HLCs)	ENSG00000119900	OGFRL1
1179	2 (HLCs)	ENSG00000120937	NPPB
1180	2 (HLCs)	ENSG00000122176	FMOD
1181	2 (HLCs)	ENSG00000122863	CHST3
1182	2 (HLCs)	ENSG00000122870	BICC1
1183	2 (HLCs)	ENSG00000122884	P4HA1
1184	2 (HLCs)	ENSG00000123191	ATP7B
1185	2 (HLCs)	ENSG00000123999	INHA
1186	2 (HLCs)	ENSG00000124440	HIF3A
1187	2 (HLCs)	ENSG00000124762	CDKN1A
1188	2 (HLCs)	ENSG00000124785	NRN1
1189	2 (HLCs)	ENSG00000125731	SH2D3A
1190	2 (HLCs)	ENSG00000125733	TRIP10
1191	2 (HLCs)	ENSG00000125775	SDCBP2
1192	2 (HLCs)	ENSG00000125841	NRSN2
1193	2 (HLCs)	ENSG00000125848	FLRT3
1194	2 (HLCs)	ENSG00000125895	TMEM74B
1195	2 (HLCs)	ENSG00000126562	WNK4
1196	2 (HLCs)	ENSG00000126903	SLC10A3
1197	2 (HLCs)	ENSG00000127863	TNFRSF19
1198	2 (HLCs)	ENSG00000128346	C22orf23
1199	2 (HLCs)	ENSG00000128591	FLNC
1200	2 (HLCs)	ENSG00000129521	EGLN3
1201	2 (HLCs)	ENSG00000130513	GDF15
1202	2 (HLCs)	ENSG00000130635	COL5A1
1203	2 (HLCs)	ENSG00000130762	ARHGEF16
1204	2 (HLCs)	ENSG00000130821	SLC6A8
1205	2 (HLCs)	ENSG00000130822	PNCK
1206	2 (HLCs)	ENSG00000130827	PLXNA3
1207	2 (HLCs)	ENSG00000130829	DUSP9
1208	2 (HLCs)	ENSG00000131037	EPS8L1
1209	2 (HLCs)	ENSG00000131398	KCNC3
1210	2 (HLCs)	ENSG00000131435	PDLIM4
1211	2 (HLCs)	ENSG00000131746	TNS4
1212	2 (HLCs)	ENSG00000131981	LGALS3
1213	2 (HLCs)	ENSG00000132205	EMILIN2
1214	2 (HLCs)	ENSG00000132321	IQCA1
1215	2 (HLCs)	ENSG00000132334	PTPRE
1216	2 (HLCs)	ENSG00000132518	GUCY2D
1217	2 (HLCs)	ENSG00000132698	RAB25
1218	2 (HLCs)	ENSG00000132821	VSTM2L
1219	2 (HLCs)	ENSG00000132854	KANK4
1220	2 (HLCs)	ENSG00000133106	EPSTI1
1221	2 (HLCs)	ENSG00000133816	MICAL2
1222	2 (HLCs)	ENSG00000134202	GSTM3
1223	2 (HLCs)	ENSG00000134243	SORT1
1224	2 (HLCs)	ENSG00000134258	VTCN1
1225	2 (HLCs)	ENSG00000134871	COL4A2
1226	2 (HLCs)	ENSG00000134962	KLB
1227	2 (HLCs)	ENSG00000135046	ANXA1
1228	2 (HLCs)	ENSG00000135052	GOLM1
1229	2 (HLCs)	ENSG00000135245	HILPDA
1230	2 (HLCs)	ENSG00000135480	KRT7
1231	2 (HLCs)	ENSG00000135549	PKIB
1232	2 (HLCs)	ENSG00000135631	RAB11FIP5
1233	2 (HLCs)	ENSG00000135678	CPM
1234	2 (HLCs)	ENSG00000135917	SLC19A3
1235	2 (HLCs)	ENSG00000136010	ALDH1L2
1236	2 (HLCs)	ENSG00000136040	PLXNC1
1237	2 (HLCs)	ENSG00000136167	LCP1
1238	2 (HLCs)	ENSG00000136193	SCRN1
1239	2 (HLCs)	ENSG00000136383	ALPK3
1240	2 (HLCs)	ENSG00000136830	NIBAN2
1241	2 (HLCs)	ENSG00000136883	KIF12
1242	2 (HLCs)	ENSG00000136960	ENPP2
1243	2 (HLCs)	ENSG00000137203	TFAP2A
1244	2 (HLCs)	ENSG00000137269	LRRC1
1245	2 (HLCs)	ENSG00000137731	FXYD2
1246	2 (HLCs)	ENSG00000137747	TMPRSS13
1247	2 (HLCs)	ENSG00000137809	ITGA11
1248	2 (HLCs)	ENSG00000137857	DUOX1
1249	2 (HLCs)	ENSG00000138061	CYP1B1
1250	2 (HLCs)	ENSG00000138119	MYOF
1251	2 (HLCs)	ENSG00000138131	LOXL4
1252	2 (HLCs)	ENSG00000138166	DUSP5
1253	2 (HLCs)	ENSG00000138193	PLCE1
1254	2 (HLCs)	ENSG00000138623	SEMA7A
1255	2 (HLCs)	ENSG00000138772	ANXA3
1256	2 (HLCs)	ENSG00000139055	ERP27
1257	2 (HLCs)	ENSG00000139629	GALNT6
1258	2 (HLCs)	ENSG00000139725	RHOF
1259	2 (HLCs)	ENSG00000140092	FBLN5
1260	2 (HLCs)	ENSG00000140254	DUOXA1
1261	2 (HLCs)	ENSG00000140274	DUOXA2
1262	2 (HLCs)	ENSG00000140279	DUOX2
1263	2 (HLCs)	ENSG00000140297	GCNT3
1264	2 (HLCs)	ENSG00000140450	ARRDC4
1265	2 (HLCs)	ENSG00000140465	CYP1A1
1266	2 (HLCs)	ENSG00000140563	MCTP2
1267	2 (HLCs)	ENSG00000140682	TGFB1I1
1268	2 (HLCs)	ENSG00000140931	CMTM3
1269	2 (HLCs)	ENSG00000141040	ZNF287
1270	2 (HLCs)	ENSG00000141526	SLC16A3
1271	2 (HLCs)	ENSG00000141574	SECTM1
1272	2 (HLCs)	ENSG00000141582	CBX4
1273	2 (HLCs)	ENSG00000141639	MAPK4
1274	2 (HLCs)	ENSG00000141696	P3H4
1275	2 (HLCs)	ENSG00000141744	PNMT
1276	2 (HLCs)	ENSG00000141756	FKBP10
1277	2 (HLCs)	ENSG00000142046	TMEM91
1278	2 (HLCs)	ENSG00000142694	EVA1B
1279	2 (HLCs)	ENSG00000142765	SYTL1
1280	2 (HLCs)	ENSG00000142798	HSPG2
1281	2 (HLCs)	ENSG00000142910	TINAGL1
1282	2 (HLCs)	ENSG00000143595	AQP10
1283	2 (HLCs)	ENSG00000145287	PLAC8
1284	2 (HLCs)	ENSG00000145569	OTULINL
1285	2 (HLCs)	ENSG00000145623	OSMR
1286	2 (HLCs)	ENSG00000146072	TNFRSF21
1287	2 (HLCs)	ENSG00000146700	SSC4D
1288	2 (HLCs)	ENSG00000146858	ZC3HAV1L
1289	2 (HLCs)	ENSG00000147168	IL2RG
1290	2 (HLCs)	ENSG00000147257	GPC3
1291	2 (HLCs)	ENSG00000148344	PTGES
1292	2 (HLCs)	ENSG00000148700	ADD3
1293	2 (HLCs)	ENSG00000149218	ENDOD1
1294	2 (HLCs)	ENSG00000149418	ST14
1295	2 (HLCs)	ENSG00000149564	ESAM
1296	2 (HLCs)	ENSG00000149596	JPH2
1297	2 (HLCs)	ENSG00000149798	CDC42EP2
1298	2 (HLCs)	ENSG00000150687	PRSS23
1299	2 (HLCs)	ENSG00000150938	CRIM1
1300	2 (HLCs)	ENSG00000151962	RBM46
1301	2 (HLCs)	ENSG00000152137	HSPB8
1302	2 (HLCs)	ENSG00000153071	DAB2
1303	2 (HLCs)	ENSG00000153294	ADGRF4
1304	2 (HLCs)	ENSG00000153822	KCNJ16
1305	2 (HLCs)	ENSG00000153902	LGI4
1306	2 (HLCs)	ENSG00000154175	ABI3BP
1307	2 (HLCs)	ENSG00000154917	RAB6B
1308	2 (HLCs)	ENSG00000155066	PROM2
1309	2 (HLCs)	ENSG00000155465	SLC7A7
1310	2 (HLCs)	ENSG00000155850	SLC26A2
1311	2 (HLCs)	ENSG00000156535	CD109
1312	2 (HLCs)	ENSG00000156675	RAB11FIP1
1313	2 (HLCs)	ENSG00000156711	MAPK13
1314	2 (HLCs)	ENSG00000156804	FBXO32
1315	2 (HLCs)	ENSG00000157227	MMP14
1316	2 (HLCs)	ENSG00000157502	PWWP3B
1317	2 (HLCs)	ENSG00000157613	CREB3L1
1318	2 (HLCs)	ENSG00000157765	SLC34A2
1319	2 (HLCs)	ENSG00000158747	NBL1
1320	2 (HLCs)	ENSG00000159167	STC1
1321	2 (HLCs)	ENSG00000159212	CLIC6
1322	2 (HLCs)	ENSG00000160588	MPZL3
1323	2 (HLCs)	ENSG00000160796	NBEAL2
1324	2 (HLCs)	ENSG00000161714	PLCD3
1325	2 (HLCs)	ENSG00000161896	IP6K3
1326	2 (HLCs)	ENSG00000161958	FGF11
1327	2 (HLCs)	ENSG00000162458	FBLIM1
1328	2 (HLCs)	ENSG00000162552	WNT4
1329	2 (HLCs)	ENSG00000162692	VCAM1
1330	2 (HLCs)	ENSG00000162849	KIF26B
1331	2 (HLCs)	ENSG00000163053	SLC16A14
1332	2 (HLCs)	ENSG00000163082	SGPP2
1333	2 (HLCs)	ENSG00000163393	SLC22A15
1334	2 (HLCs)	ENSG00000163536	SERPINI1
1335	2 (HLCs)	ENSG00000163624	CDS1
1336	2 (HLCs)	ENSG00000163637	PRICKLE2
1337	2 (HLCs)	ENSG00000163638	ADAMTS9
1338	2 (HLCs)	ENSG00000163762	TM4SF18
1339	2 (HLCs)	ENSG00000163814	CDCP1
1340	2 (HLCs)	ENSG00000163879	DNALI1
1341	2 (HLCs)	ENSG00000163898	LIPH
1342	2 (HLCs)	ENSG00000163947	ARHGEF3
1343	2 (HLCs)	ENSG00000163993	S100P
1344	2 (HLCs)	ENSG00000164093	PITX2
1345	2 (HLCs)	ENSG00000164171	ITGA2
1346	2 (HLCs)	ENSG00000164251	F2RL1
1347	2 (HLCs)	ENSG00000164266	SPINK1
1348	2 (HLCs)	ENSG00000164292	RHOBTB3
1349	2 (HLCs)	ENSG00000164638	SLC29A4
1350	2 (HLCs)	ENSG00000164683	HEY1
1351	2 (HLCs)	ENSG00000164932	CTHRC1
1352	2 (HLCs)	ENSG00000164970	FAM219A
1353	2 (HLCs)	ENSG00000165125	TRPV6
1354	2 (HLCs)	ENSG00000165556	CDX2
1355	2 (HLCs)	ENSG00000165757	JCAD
1356	2 (HLCs)	ENSG00000166145	SPINT1
1357	2 (HLCs)	ENSG00000166165	CKB
1358	2 (HLCs)	ENSG00000166250	CLMP
1359	2 (HLCs)	ENSG00000166557	TMED3
1360	2 (HLCs)	ENSG00000166963	MAP1A
1361	2 (HLCs)	ENSG00000167080	B4GALNT2
1362	2 (HLCs)	ENSG00000167123	CERCAM
1363	2 (HLCs)	ENSG00000167183	PRR15L
1364	2 (HLCs)	ENSG00000167244	IGF2
1365	2 (HLCs)	ENSG00000167286	CD3D
1366	2 (HLCs)	ENSG00000167535	CACNB3
1367	2 (HLCs)	ENSG00000167608	TMC4
1368	2 (HLCs)	ENSG00000167615	LENG8
1369	2 (HLCs)	ENSG00000167642	SPINT2
1370	2 (HLCs)	ENSG00000167759	KLK13
1371	2 (HLCs)	ENSG00000167861	HID1
1372	2 (HLCs)	ENSG00000168143	FAM83B
1373	2 (HLCs)	ENSG00000168386	FILIP1L
1374	2 (HLCs)	ENSG00000168453	HR
1375	2 (HLCs)	ENSG00000168615	ADAM9
1376	2 (HLCs)	ENSG00000168743	NPNT
1377	2 (HLCs)	ENSG00000169403	PTAFR
1378	2 (HLCs)	ENSG00000169418	NPR1
1379	2 (HLCs)	ENSG00000169710	FASN
1380	2 (HLCs)	ENSG00000169851	PCDH7
1381	2 (HLCs)	ENSG00000169908	TM4SF1
1382	2 (HLCs)	ENSG00000170004	CHD3
1383	2 (HLCs)	ENSG00000170465	KRT6C
1384	2 (HLCs)	ENSG00000170801	HTRA3
1385	2 (HLCs)	ENSG00000170921	TANC2
1386	2 (HLCs)	ENSG00000170954	ZNF415
1387	2 (HLCs)	ENSG00000171132	PRKCE
1388	2 (HLCs)	ENSG00000171219	CDC42BPG
1389	2 (HLCs)	ENSG00000171345	KRT19
1390	2 (HLCs)	ENSG00000171631	P2RY6
1391	2 (HLCs)	ENSG00000172572	PDE3A
1392	2 (HLCs)	ENSG00000172638	EFEMP2
1393	2 (HLCs)	ENSG00000172818	OVOL1
1394	2 (HLCs)	ENSG00000173262	SLC2A14
1395	2 (HLCs)	ENSG00000173482	PTPRM
1396	2 (HLCs)	ENSG00000173535	TNFRSF10C
1397	2 (HLCs)	ENSG00000173559	NABP1
1398	2 (HLCs)	ENSG00000173702	MUC13
1399	2 (HLCs)	ENSG00000173706	HEG1
1400	2 (HLCs)	ENSG00000173918	C1QTNF1
1401	2 (HLCs)	ENSG00000174282	ZBTB4
1402	2 (HLCs)	ENSG00000174640	SLCO2A1
1403	2 (HLCs)	ENSG00000175164	ABO
1404	2 (HLCs)	ENSG00000175356	SCUBE2
1405	2 (HLCs)	ENSG00000176273	SLC35G1
1406	2 (HLCs)	ENSG00000176532	PRR15
1407	2 (HLCs)	ENSG00000176597	B3GNT5
1408	2 (HLCs)	ENSG00000176845	METRNL
1409	2 (HLCs)	ENSG00000176920	FUT2
1410	2 (HLCs)	ENSG00000177096	PHETA2
1411	2 (HLCs)	ENSG00000177191	B3GNT8
1412	2 (HLCs)	ENSG00000178038	ALS2CL
1413	2 (HLCs)	ENSG00000178597	PSAPL1
1414	2 (HLCs)	ENSG00000178726	THBD
1415	2 (HLCs)	ENSG00000178773	CPNE7
1416	2 (HLCs)	ENSG00000178809	TRIM73
1417	2 (HLCs)	ENSG00000179403	VWA1
1418	2 (HLCs)	ENSG00000179593	ALOX15B
1419	2 (HLCs)	ENSG00000179913	B3GNT3
1420	2 (HLCs)	ENSG00000180287	PLD5
1421	2 (HLCs)	ENSG00000180758	GPR157
1422	2 (HLCs)	ENSG00000181019	NQO1
1423	2 (HLCs)	ENSG00000181885	CLDN7
1424	2 (HLCs)	ENSG00000182378	PLCXD1
1425	2 (HLCs)	ENSG00000182472	CAPN12
1426	2 (HLCs)	ENSG00000182489	XKRX
1427	2 (HLCs)	ENSG00000182534	MXRA7
1428	2 (HLCs)	ENSG00000182541	LIMK2
1429	2 (HLCs)	ENSG00000182749	PAQR7
1430	2 (HLCs)	ENSG00000182752	PAPPA
1431	2 (HLCs)	ENSG00000182782	HCAR2
1432	2 (HLCs)	ENSG00000182795	C1orf116
1433	2 (HLCs)	ENSG00000183098	GPC6
1434	2 (HLCs)	ENSG00000183779	ZNF703
1435	2 (HLCs)	ENSG00000183837	PNMA3
1436	2 (HLCs)	ENSG00000183844	FAM3B
1437	2 (HLCs)	ENSG00000184292	TACSTD2
1438	2 (HLCs)	ENSG00000184347	SLIT3
1439	2 (HLCs)	ENSG00000184363	PKP3
1440	2 (HLCs)	ENSG00000184368	MAP7D2
1441	2 (HLCs)	ENSG00000184792	OSBP2
1442	2 (HLCs)	ENSG00000184916	JAG2
1443	2 (HLCs)	ENSG00000185499	MUC1
1444	2 (HLCs)	ENSG00000185761	ADAMTSL5
1445	2 (HLCs)	ENSG00000187210	GCNT1
1446	2 (HLCs)	ENSG00000187773	DIPK1C
1447	2 (HLCs)	ENSG00000188060	RAB42
1448	2 (HLCs)	ENSG00000188153	COL4A5
1449	2 (HLCs)	ENSG00000188227	ZNF793
1450	2 (HLCs)	ENSG00000188290	HES4
1451	2 (HLCs)	ENSG00000188910	GJB3
1452	2 (HLCs)	ENSG00000189120	SP6
1453	2 (HLCs)	ENSG00000189143	CLDN4
1454	2 (HLCs)	ENSG00000189334	S100A14
1455	2 (HLCs)	ENSG00000189409	MMP23B
1456	2 (HLCs)	ENSG00000196611	MMP1
1457	2 (HLCs)	ENSG00000196972	SMIM10L2B
1458	2 (HLCs)	ENSG00000197381	ADARB1
1459	2 (HLCs)	ENSG00000197956	S100A6
1460	2 (HLCs)	ENSG00000198203	SULT1C2
1461	2 (HLCs)	ENSG00000198648	STK39
1462	2 (HLCs)	ENSG00000198758	EPS8L3
1463	2 (HLCs)	ENSG00000198832	SELENOM
1464	2 (HLCs)	ENSG00000198959	TGM2
1465	2 (HLCs)	ENSG00000203857	HSD3B1
1466	2 (HLCs)	ENSG00000204789	NA
1467	2 (HLCs)	ENSG00000205420	KRT6A
1468	2 (HLCs)	ENSG00000206324	AGPAT1
1469	2 (HLCs)	ENSG00000206538	VGLL3
1470	2 (HLCs)	ENSG00000212747	RTL8B
1471	2 (HLCs)	ENSG00000213213	CCDC183
1472	2 (HLCs)	ENSG00000214193	SH3D21
1473	2 (HLCs)	ENSG00000215915	ATAD3C
1474	2 (HLCs)	ENSG00000221923	ZNF880
1475	2 (HLCs)	ENSG00000223459	NA
1476	2 (HLCs)	ENSG00000223957	NEU1
1477	2 (HLCs)	ENSG00000224081	SLC44A3-AS1
1478	2 (HLCs)	ENSG00000224212	TAP1
1479	2 (HLCs)	ENSG00000224320	HLA-A
1480	2 (HLCs)	ENSG00000224654	UBD
1481	2 (HLCs)	ENSG00000225454	SFTA2
1482	2 (HLCs)	ENSG00000225737	SKIV2L
1483	2 (HLCs)	ENSG00000226384	GTF2H4
1484	2 (HLCs)	ENSG00000226618	PRRC2A
1485	2 (HLCs)	ENSG00000228405	RNF5
1486	2 (HLCs)	ENSG00000228435	C6orf47
1487	2 (HLCs)	ENSG00000230341	PPP1R18
1488	2 (HLCs)	ENSG00000230456	DDR1
1489	2 (HLCs)	ENSG00000230700	CSNK2B
1490	2 (HLCs)	ENSG00000231925	TAPBP
1491	2 (HLCs)	ENSG00000232126	HLA-B
1492	2 (HLCs)	ENSG00000232434	AJM1
1493	2 (HLCs)	ENSG00000233438	NA
1494	2 (HLCs)	ENSG00000235162	C12orf75
1495	2 (HLCs)	ENSG00000237515	SHISA9
1496	2 (HLCs)	ENSG00000240216	NA
1497	2 (HLCs)	ENSG00000241484	ARHGAP8
1498	2 (HLCs)	ENSG00000242779	ZNF702P
1499	2 (HLCs)	ENSG00000250120	PCDHA10
1500	2 (HLCs)	ENSG00000251664	PCDHA12
1501	2 (HLCs)	ENSG00000254470	AP5B1
1502	2 (HLCs)	ENSG00000255398	HCAR3
1503	2 (HLCs)	ENSG00000255815	NA
1504	2 (HLCs)	ENSG00000256229	ZNF486
1505	2 (HLCs)	ENSG00000261150	EPPK1
1506	2 (HLCs)	ENSG00000263309	KRT23
1507	2 (HLCs)	ENSG00000264424	MYH4
1508	2 (HLCs)	ENSG00000266086	NA
1509	2 (HLCs)	ENSG00000274538	PHLDA2
1510	2 (HLCs)	ENSG00000274602	PI4KAP1
1511	2 (HLCs)	ENSG00000275153	TBC1D3K
1512	2 (HLCs)	ENSG00000275176	ACACA
1513	2 (HLCs)	ENSG00000275246	TLCD2
1514	2 (HLCs)	ENSG00000276458	LENG8
1515	2 (HLCs)	ENSG00000276836	ARHGAP27
1516	2 (HLCs)	ENSG00000276838	SERPINF2
1517	2 (HLCs)	ENSG00000277060	NLRP2
1518	2 (HLCs)	ENSG00000277377	SERPINA1
1519	3 (Heps)	ENSG00000003402	CFLAR
1520	3 (Heps)	ENSG00000003436	TFPI
1521	3 (Heps)	ENSG00000003989	SLC7A2
1522	3 (Heps)	ENSG00000005243	COPZ2
1523	3 (Heps)	ENSG00000005469	CROT
1524	3 (Heps)	ENSG00000005844	ITGAL
1525	3 (Heps)	ENSG00000005893	LAMP2
1526	3 (Heps)	ENSG00000006062	MAP3K14
1527	3 (Heps)	ENSG00000006534	ALDH3B1
1528	3 (Heps)	ENSG00000006555	TTC22
1529	3 (Heps)	ENSG00000006756	ARSD
1530	3 (Heps)	ENSG00000008226	DLEC1
1531	3 (Heps)	ENSG00000008513	ST3GAL1
1532	3 (Heps)	ENSG00000008517	IL32
1533	3 (Heps)	ENSG00000009413	REV3L
1534	3 (Heps)	ENSG00000009950	MLXIPL
1535	3 (Heps)	ENSG00000010704	HFE
1536	3 (Heps)	ENSG00000013288	MAN2B2
1537	3 (Heps)	ENSG00000013364	MVP
1538	3 (Heps)	ENSG00000015153	YAF2
1539	3 (Heps)	ENSG00000020577	SAMD4A
1540	3 (Heps)	ENSG00000021355	SERPINB1
1541	3 (Heps)	ENSG00000021826	CPS1
1542	3 (Heps)	ENSG00000023909	GCLM
1543	3 (Heps)	ENSG00000024422	EHD2
1544	3 (Heps)	ENSG00000025708	TYMP
1545	3 (Heps)	ENSG00000026297	RNASET2
1546	3 (Heps)	ENSG00000026950	BTN3A1
1547	3 (Heps)	ENSG00000027697	IFNGR1
1548	3 (Heps)	ENSG00000034677	RNF19A
1549	3 (Heps)	ENSG00000039139	DNAH5
1550	3 (Heps)	ENSG00000039523	RIPOR1
1551	3 (Heps)	ENSG00000042286	AIFM2
1552	3 (Heps)	ENSG00000044446	PHKA2
1553	3 (Heps)	ENSG00000047346	FAM214A
1554	3 (Heps)	ENSG00000047365	ARAP2
1555	3 (Heps)	ENSG00000047634	SCML1
1556	3 (Heps)	ENSG00000048405	ZNF800
1557	3 (Heps)	ENSG00000049239	H6PD
1558	3 (Heps)	ENSG00000051108	HERPUD1
1559	3 (Heps)	ENSG00000052795	FNIP2
1560	3 (Heps)	ENSG00000052802	MSMO1
1561	3 (Heps)	ENSG00000054277	OPN3
1562	3 (Heps)	ENSG00000057294	PKP2
1563	3 (Heps)	ENSG00000059378	PARP12
1564	3 (Heps)	ENSG00000059728	MXD1
1565	3 (Heps)	ENSG00000059769	DNAJC25
1566	3 (Heps)	ENSG00000060971	ACAA1
1567	3 (Heps)	ENSG00000061656	SPAG4
1568	3 (Heps)	ENSG00000062282	DGAT2
1569	3 (Heps)	ENSG00000063587	ZNF275
1570	3 (Heps)	ENSG00000064012	CASP8
1571	3 (Heps)	ENSG00000065485	PDIA5
1572	3 (Heps)	ENSG00000065809	FAM107B
1573	3 (Heps)	ENSG00000065833	ME1
1574	3 (Heps)	ENSG00000066813	ACSM2B
1575	3 (Heps)	ENSG00000067066	SP100
1576	3 (Heps)	ENSG00000067082	KLF6
1577	3 (Heps)	ENSG00000067167	TRAM1
1578	3 (Heps)	ENSG00000067182	TNFRSF1A
1579	3 (Heps)	ENSG00000068079	IFI35
1580	3 (Heps)	ENSG00000069399	BCL3
1581	3 (Heps)	ENSG00000069667	RORA
1582	3 (Heps)	ENSG00000069974	RAB27A
1583	3 (Heps)	ENSG00000070159	PTPN3
1584	3 (Heps)	ENSG00000070404	FSTL3
1585	3 (Heps)	ENSG00000071537	SEL1L
1586	3 (Heps)	ENSG00000072163	LIMS2
1587	3 (Heps)	ENSG00000072682	P4HA2
1588	3 (Heps)	ENSG00000072778	ACADVL
1589	3 (Heps)	ENSG00000073008	PVR
1590	3 (Heps)	ENSG00000073060	SCARB1
1591	3 (Heps)	ENSG00000073331	ALPK1
1592	3 (Heps)	ENSG00000073605	GSDMB
1593	3 (Heps)	ENSG00000075234	TTC38
1594	3 (Heps)	ENSG00000075407	ZNF37A
1595	3 (Heps)	ENSG00000075420	FNDC3B
1596	3 (Heps)	ENSG00000075426	FOSL2
1597	3 (Heps)	ENSG00000075651	PLD1
1598	3 (Heps)	ENSG00000075945	KIFAP3
1599	3 (Heps)	ENSG00000076351	SLC46A1
1600	3 (Heps)	ENSG00000076641	PAG1
1601	3 (Heps)	ENSG00000076770	MBNL3
1602	3 (Heps)	ENSG00000077238	IL4R
1603	3 (Heps)	ENSG00000078804	TP53INP2
1604	3 (Heps)	ENSG00000079308	TNS1
1605	3 (Heps)	ENSG00000079385	CEACAM1
1606	3 (Heps)	ENSG00000080031	PTPRH
1607	3 (Heps)	ENSG00000080503	SMARCA2
1608	3 (Heps)	ENSG00000080561	MID2
1609	3 (Heps)	ENSG00000081665	ZNF506
1610	3 (Heps)	ENSG00000082438	COBLL1
1611	3 (Heps)	ENSG00000083223	TUT7
1612	3 (Heps)	ENSG00000083444	PLOD1
1613	3 (Heps)	ENSG00000084070	SMAP2
1614	3 (Heps)	ENSG00000084674	APOB
1615	3 (Heps)	ENSG00000085063	CD59
1616	3 (Heps)	ENSG00000085465	OVGP1
1617	3 (Heps)	ENSG00000086062	B4GALT1
1618	3 (Heps)	ENSG00000087008	ACOX3
1619	3 (Heps)	ENSG00000087074	PPP1R15A
1620	3 (Heps)	ENSG00000087086	FTL
1621	3 (Heps)	ENSG00000088386	SLC15A1
1622	3 (Heps)	ENSG00000088881	EBF4
1623	3 (Heps)	ENSG00000089127	OAS1
1624	3 (Heps)	ENSG00000090013	BLVRB
1625	3 (Heps)	ENSG00000090339	ICAM1
1626	3 (Heps)	ENSG00000090376	IRAK3
1627	3 (Heps)	ENSG00000090539	CHRD
1628	3 (Heps)	ENSG00000090581	GNPTG
1629	3 (Heps)	ENSG00000090975	PITPNM2
1630	3 (Heps)	ENSG00000091262	ABCC6
1631	3 (Heps)	ENSG00000091513	TF
1632	3 (Heps)	ENSG00000093010	COMT
1633	3 (Heps)	ENSG00000095321	CRAT
1634	3 (Heps)	ENSG00000095539	SEMA4G
1635	3 (Heps)	ENSG00000096060	FKBP5
1636	3 (Heps)	ENSG00000096092	TMEM14A
1637	3 (Heps)	ENSG00000096150	RPS18
1638	3 (Heps)	ENSG00000099250	NRP1
1639	3 (Heps)	ENSG00000099998	GGT5
1640	3 (Heps)	ENSG00000100031	GGT1
1641	3 (Heps)	ENSG00000100100	PIK3IP1
1642	3 (Heps)	ENSG00000100150	DEPDC5
1643	3 (Heps)	ENSG00000100219	XBP1
1644	3 (Heps)	ENSG00000100234	TIMP3
1645	3 (Heps)	ENSG00000100242	SUN2
1646	3 (Heps)	ENSG00000100243	CYB5R3
1647	3 (Heps)	ENSG00000100284	TOM1
1648	3 (Heps)	ENSG00000100292	HMOX1
1649	3 (Heps)	ENSG00000100342	APOL1
1650	3 (Heps)	ENSG00000100417	PMM1
1651	3 (Heps)	ENSG00000100558	PLEK2
1652	3 (Heps)	ENSG00000100564	PIGH
1653	3 (Heps)	ENSG00000100599	RIN3
1654	3 (Heps)	ENSG00000100612	DHRS7
1655	3 (Heps)	ENSG00000100647	SUSD6
1656	3 (Heps)	ENSG00000101049	SGK2
1657	3 (Heps)	ENSG00000101076	HNF4A
1658	3 (Heps)	ENSG00000101096	NFATC2
1659	3 (Heps)	ENSG00000101160	CTSZ
1660	3 (Heps)	ENSG00000101255	TRIB3
1661	3 (Heps)	ENSG00000101439	CST3
1662	3 (Heps)	ENSG00000101460	MAP1LC3A
1663	3 (Heps)	ENSG00000101782	RIOK3
1664	3 (Heps)	ENSG00000101844	ATG4A
1665	3 (Heps)	ENSG00000101940	WDR13
1666	3 (Heps)	ENSG00000102007	PLP2
1667	3 (Heps)	ENSG00000102471	NDFIP2
1668	3 (Heps)	ENSG00000102554	KLF5
1669	3 (Heps)	ENSG00000102580	DNAJC3
1670	3 (Heps)	ENSG00000102760	RGCC
1671	3 (Heps)	ENSG00000102871	TRADD
1672	3 (Heps)	ENSG00000102878	HSF4
1673	3 (Heps)	ENSG00000102890	ELMO3
1674	3 (Heps)	ENSG00000102897	LYRM1
1675	3 (Heps)	ENSG00000102967	DHODH
1676	3 (Heps)	ENSG00000103226	NOMO3
1677	3 (Heps)	ENSG00000103319	EEF2K
1678	3 (Heps)	ENSG00000103381	CPPED1
1679	3 (Heps)	ENSG00000103811	CTSH
1680	3 (Heps)	ENSG00000103876	FAH
1681	3 (Heps)	ENSG00000104154	SLC30A4
1682	3 (Heps)	ENSG00000104213	PDGFRL
1683	3 (Heps)	ENSG00000104324	CPQ
1684	3 (Heps)	ENSG00000104361	NIPAL2
1685	3 (Heps)	ENSG00000104419	NDRG1
1686	3 (Heps)	ENSG00000104450	SPAG1
1687	3 (Heps)	ENSG00000104537	ANXA13
1688	3 (Heps)	ENSG00000104611	SH2D4A
1689	3 (Heps)	ENSG00000104635	SLC39A14
1690	3 (Heps)	ENSG00000104760	FGL1
1691	3 (Heps)	ENSG00000105357	MYH14
1692	3 (Heps)	ENSG00000105379	ETFB
1693	3 (Heps)	ENSG00000105643	ARRDC2
1694	3 (Heps)	ENSG00000105707	HPN
1695	3 (Heps)	ENSG00000105835	NAMPT
1696	3 (Heps)	ENSG00000105854	PON2
1697	3 (Heps)	ENSG00000105971	CAV2
1698	3 (Heps)	ENSG00000106351	AGFG2
1699	3 (Heps)	ENSG00000106366	SERPINE1
1700	3 (Heps)	ENSG00000106384	MOGAT3
1701	3 (Heps)	ENSG00000106546	AHR
1702	3 (Heps)	ENSG00000106686	SPATA6L
1703	3 (Heps)	ENSG00000106688	SLC1A1
1704	3 (Heps)	ENSG00000106780	MEGF9
1705	3 (Heps)	ENSG00000106785	TRIM14
1706	3 (Heps)	ENSG00000106804	C5
1707	3 (Heps)	ENSG00000106853	PTGR1
1708	3 (Heps)	ENSG00000107104	KANK1
1709	3 (Heps)	ENSG00000107159	CA9
1710	3 (Heps)	ENSG00000107249	GLIS3
1711	3 (Heps)	ENSG00000108375	RNF43
1712	3 (Heps)	ENSG00000108509	CAMTA2
1713	3 (Heps)	ENSG00000108551	RASD1
1714	3 (Heps)	ENSG00000108846	ABCC3
1715	3 (Heps)	ENSG00000108861	DUSP3
1716	3 (Heps)	ENSG00000109079	TNFAIP1
1717	3 (Heps)	ENSG00000109436	TBC1D9
1718	3 (Heps)	ENSG00000109466	KLHL2
1719	3 (Heps)	ENSG00000109618	SEPSECS
1720	3 (Heps)	ENSG00000109854	HTATIP2
1721	3 (Heps)	ENSG00000109906	ZBTB16
1722	3 (Heps)	ENSG00000110013	SIAE
1723	3 (Heps)	ENSG00000110090	CPT1A
1724	3 (Heps)	ENSG00000110244	APOA4
1725	3 (Heps)	ENSG00000110245	APOC3
1726	3 (Heps)	ENSG00000110328	GALNT18
1727	3 (Heps)	ENSG00000110422	HIPK3
1728	3 (Heps)	ENSG00000110455	ACCS
1729	3 (Heps)	ENSG00000110628	SLC22A18
1730	3 (Heps)	ENSG00000110693	SOX6
1731	3 (Heps)	ENSG00000110723	EXPH5
1732	3 (Heps)	ENSG00000111077	TNS2
1733	3 (Heps)	ENSG00000111321	LTBR
1734	3 (Heps)	ENSG00000111331	OAS3
1735	3 (Heps)	ENSG00000111348	ARHGDIB
1736	3 (Heps)	ENSG00000111666	CHPT1
1737	3 (Heps)	ENSG00000111727	HCFC2
1738	3 (Heps)	ENSG00000111816	FRK
1739	3 (Heps)	ENSG00000111859	NEDD9
1740	3 (Heps)	ENSG00000111885	MAN1A1
1741	3 (Heps)	ENSG00000111897	SERINC1
1742	3 (Heps)	ENSG00000111907	TPD52L1
1743	3 (Heps)	ENSG00000111912	NCOA7
1744	3 (Heps)	ENSG00000112245	PTP4A1
1745	3 (Heps)	ENSG00000112343	TRIM38
1746	3 (Heps)	ENSG00000112414	ADGRG6
1747	3 (Heps)	ENSG00000112494	UNC93A
1748	3 (Heps)	ENSG00000112715	VEGFA
1749	3 (Heps)	ENSG00000112773	TENT5A
1750	3 (Heps)	ENSG00000112977	DAP
1751	3 (Heps)	ENSG00000113369	ARRDC3
1752	3 (Heps)	ENSG00000113494	PRLR
1753	3 (Heps)	ENSG00000113742	CPEB4
1754	3 (Heps)	ENSG00000113805	CNTN3
1755	3 (Heps)	ENSG00000113916	BCL6
1756	3 (Heps)	ENSG00000113924	HGD
1757	3 (Heps)	ENSG00000114378	HYAL1
1758	3 (Heps)	ENSG00000114480	GBE1
1759	3 (Heps)	ENSG00000115009	CCL20
1760	3 (Heps)	ENSG00000115084	SLC35F5
1761	3 (Heps)	ENSG00000115226	FNDC4
1762	3 (Heps)	ENSG00000115255	REEP6
1763	3 (Heps)	ENSG00000115414	FN1
1764	3 (Heps)	ENSG00000115425	PECR
1765	3 (Heps)	ENSG00000115590	IL1R2
1766	3 (Heps)	ENSG00000115594	IL1R1
1767	3 (Heps)	ENSG00000115604	IL18R1
1768	3 (Heps)	ENSG00000115648	MLPH
1769	3 (Heps)	ENSG00000115756	HPCAL1
1770	3 (Heps)	ENSG00000115884	SDC1
1771	3 (Heps)	ENSG00000115902	SLC1A4
1772	3 (Heps)	ENSG00000116016	EPAS1
1773	3 (Heps)	ENSG00000116044	NFE2L2
1774	3 (Heps)	ENSG00000116096	SPR
1775	3 (Heps)	ENSG00000116209	TMEM59
1776	3 (Heps)	ENSG00000116285	ERRFI1
1777	3 (Heps)	ENSG00000116574	RHOU
1778	3 (Heps)	ENSG00000116663	FBXO6
1779	3 (Heps)	ENSG00000116704	SLC35D1
1780	3 (Heps)	ENSG00000116717	GADD45A
1781	3 (Heps)	ENSG00000116977	LGALS8
1782	3 (Heps)	ENSG00000117151	CTBS
1783	3 (Heps)	ENSG00000117226	GBP3
1784	3 (Heps)	ENSG00000117305	HMGCL
1785	3 (Heps)	ENSG00000117500	TMED5
1786	3 (Heps)	ENSG00000117528	ABCD3
1787	3 (Heps)	ENSG00000117758	STX12
1788	3 (Heps)	ENSG00000117834	SLC5A9
1789	3 (Heps)	ENSG00000117984	CTSD
1790	3 (Heps)	ENSG00000118503	TNFAIP3
1791	3 (Heps)	ENSG00000118508	RAB32
1792	3 (Heps)	ENSG00000118515	SGK1
1793	3 (Heps)	ENSG00000118596	SLC16A7
1794	3 (Heps)	ENSG00000118640	VAMP8
1795	3 (Heps)	ENSG00000118777	ABCG2
1796	3 (Heps)	ENSG00000118804	STBD1
1797	3 (Heps)	ENSG00000118985	ELL2
1798	3 (Heps)	ENSG00000119138	KLF9
1799	3 (Heps)	ENSG00000119242	CCDC92
1800	3 (Heps)	ENSG00000119408	NEK6
1801	3 (Heps)	ENSG00000119431	HDHD3
1802	3 (Heps)	ENSG00000119471	HSDL2
1803	3 (Heps)	ENSG00000119535	CSF3R
1804	3 (Heps)	ENSG00000119686	FLVCR2
1805	3 (Heps)	ENSG00000119917	IFIT3
1806	3 (Heps)	ENSG00000119922	IFIT2
1807	3 (Heps)	ENSG00000119927	GPAM
1808	3 (Heps)	ENSG00000119946	CNNM1
1809	3 (Heps)	ENSG00000119950	MXI1
1810	3 (Heps)	ENSG00000120129	DUSP1
1811	3 (Heps)	ENSG00000120549	KIAA1217
1812	3 (Heps)	ENSG00000120675	DNAJC15
1813	3 (Heps)	ENSG00000120690	ELF1
1814	3 (Heps)	ENSG00000120708	TGFBI
1815	3 (Heps)	ENSG00000120725	SIL1
1816	3 (Heps)	ENSG00000120738	EGR1
1817	3 (Heps)	ENSG00000120860	WASHC3
1818	3 (Heps)	ENSG00000120899	PTK2B
1819	3 (Heps)	ENSG00000120910	PPP3CC
1820	3 (Heps)	ENSG00000121039	RDH10
1821	3 (Heps)	ENSG00000121089	NA
1822	3 (Heps)	ENSG00000121671	CRY2
1823	3 (Heps)	ENSG00000121858	TNFSF10
1824	3 (Heps)	ENSG00000122035	RASL11A
1825	3 (Heps)	ENSG00000122490	PQLC1
1826	3 (Heps)	ENSG00000122547	EEPD1
1827	3 (Heps)	ENSG00000122641	INHBA
1828	3 (Heps)	ENSG00000122642	FKBP9
1829	3 (Heps)	ENSG00000122912	SLC25A16
1830	3 (Heps)	ENSG00000123178	SPRYD7
1831	3 (Heps)	ENSG00000123240	OPTN
1832	3 (Heps)	ENSG00000123384	LRP1
1833	3 (Heps)	ENSG00000123609	NMI
1834	3 (Heps)	ENSG00000123684	LPGAT1
1835	3 (Heps)	ENSG00000123689	G0S2
1836	3 (Heps)	ENSG00000124107	SLPI
1837	3 (Heps)	ENSG00000124145	SDC4
1838	3 (Heps)	ENSG00000124201	ZNFX1
1839	3 (Heps)	ENSG00000124370	MCEE
1840	3 (Heps)	ENSG00000124570	SERPINB6
1841	3 (Heps)	ENSG00000124602	UNC5CL
1842	3 (Heps)	ENSG00000124788	ATXN1
1843	3 (Heps)	ENSG00000124839	RAB17
1844	3 (Heps)	ENSG00000124920	MYRF
1845	3 (Heps)	ENSG00000124942	AHNAK
1846	3 (Heps)	ENSG00000125037	EMC3
1847	3 (Heps)	ENSG00000125089	SH3TC1
1848	3 (Heps)	ENSG00000125347	IRF1
1849	3 (Heps)	ENSG00000125629	INSIG2
1850	3 (Heps)	ENSG00000125772	GPCPD1
1851	3 (Heps)	ENSG00000125798	FOXA2
1852	3 (Heps)	ENSG00000125827	TMX4
1853	3 (Heps)	ENSG00000126218	F10
1854	3 (Heps)	ENSG00000126267	COX6B1
1855	3 (Heps)	ENSG00000126524	SBDS
1856	3 (Heps)	ENSG00000126709	IFI6
1857	3 (Heps)	ENSG00000127084	FGD3
1858	3 (Heps)	ENSG00000127241	MASP1
1859	3 (Heps)	ENSG00000127399	LRRC61
1860	3 (Heps)	ENSG00000127419	TMEM175
1861	3 (Heps)	ENSG00000127666	TICAM1
1862	3 (Heps)	ENSG00000127831	VIL1
1863	3 (Heps)	ENSG00000128016	ZFP36
1864	3 (Heps)	ENSG00000128283	CDC42EP1
1865	3 (Heps)	ENSG00000128335	APOL2
1866	3 (Heps)	ENSG00000128573	FOXP2
1867	3 (Heps)	ENSG00000128590	DNAJB9
1868	3 (Heps)	ENSG00000129226	CD68
1869	3 (Heps)	ENSG00000129422	MTUS1
1870	3 (Heps)	ENSG00000129514	FOXA1
1871	3 (Heps)	ENSG00000129566	TEP1
1872	3 (Heps)	ENSG00000129636	ITFG1
1873	3 (Heps)	ENSG00000129946	SHC2
1874	3 (Heps)	ENSG00000129988	LBP
1875	3 (Heps)	ENSG00000130005	GAMT
1876	3 (Heps)	ENSG00000130023	ERMARD
1877	3 (Heps)	ENSG00000130066	SAT1
1878	3 (Heps)	ENSG00000130203	APOE
1879	3 (Heps)	ENSG00000130427	EPO
1880	3 (Heps)	ENSG00000130517	PGPEP1
1881	3 (Heps)	ENSG00000130779	CLIP1
1882	3 (Heps)	ENSG00000130813	SHFL
1883	3 (Heps)	ENSG00000130958	SLC35D2
1884	3 (Heps)	ENSG00000131018	SYNE1
1885	3 (Heps)	ENSG00000131069	ACSS2
1886	3 (Heps)	ENSG00000131378	RFTN1
1887	3 (Heps)	ENSG00000131482	G6PC
1888	3 (Heps)	ENSG00000131724	IL13RA1
1889	3 (Heps)	ENSG00000131791	PRKAB2
1890	3 (Heps)	ENSG00000132329	RAMP1
1891	3 (Heps)	ENSG00000132357	CARD6
1892	3 (Heps)	ENSG00000132669	RIN2
1893	3 (Heps)	ENSG00000132677	RHBG
1894	3 (Heps)	ENSG00000132793	LPIN3
1895	3 (Heps)	ENSG00000133135	RNF128
1896	3 (Heps)	ENSG00000133321	PLAAT4
1897	3 (Heps)	ENSG00000133424	LARGE1
1898	3 (Heps)	ENSG00000133639	BTG1
1899	3 (Heps)	ENSG00000133657	ATP13A3
1900	3 (Heps)	ENSG00000133794	ARNTL
1901	3 (Heps)	ENSG00000133800	LYVE1
1902	3 (Heps)	ENSG00000134107	BHLHE40
1903	3 (Heps)	ENSG00000134109	EDEM1
1904	3 (Heps)	ENSG00000134317	GRHL1
1905	3 (Heps)	ENSG00000134330	IAH1
1906	3 (Heps)	ENSG00000134333	LDHA
1907	3 (Heps)	ENSG00000134339	SAA2
1908	3 (Heps)	ENSG00000134352	IL6ST
1909	3 (Heps)	ENSG00000134470	IL15RA
1910	3 (Heps)	ENSG00000134531	EMP1
1911	3 (Heps)	ENSG00000135047	CTSL
1912	3 (Heps)	ENSG00000135100	HNF1A
1913	3 (Heps)	ENSG00000135111	TBX3
1914	3 (Heps)	ENSG00000135124	P2RX4
1915	3 (Heps)	ENSG00000135218	CD36
1916	3 (Heps)	ENSG00000135220	UGT2A3
1917	3 (Heps)	ENSG00000135317	SNX14
1918	3 (Heps)	ENSG00000135378	PRRG4
1919	3 (Heps)	ENSG00000135722	FBXL8
1920	3 (Heps)	ENSG00000135744	AGT
1921	3 (Heps)	ENSG00000135766	EGLN1
1922	3 (Heps)	ENSG00000135828	RNASEL
1923	3 (Heps)	ENSG00000135899	SP110
1924	3 (Heps)	ENSG00000135926	TMBIM1
1925	3 (Heps)	ENSG00000136068	FLNB
1926	3 (Heps)	ENSG00000136147	PHF11
1927	3 (Heps)	ENSG00000136153	LMO7
1928	3 (Heps)	ENSG00000136156	ITM2B
1929	3 (Heps)	ENSG00000136205	TNS3
1930	3 (Heps)	ENSG00000136371	MTHFS
1931	3 (Heps)	ENSG00000136436	CALCOCO2
1932	3 (Heps)	ENSG00000136478	TEX2
1933	3 (Heps)	ENSG00000136574	GATA4
1934	3 (Heps)	ENSG00000136770	DNAJC1
1935	3 (Heps)	ENSG00000136826	KLF4
1936	3 (Heps)	ENSG00000136867	SLC31A2
1937	3 (Heps)	ENSG00000136872	ALDOB
1938	3 (Heps)	ENSG00000136936	XPA
1939	3 (Heps)	ENSG00000137171	KLC4
1940	3 (Heps)	ENSG00000137312	FLOT1
1941	3 (Heps)	ENSG00000137414	FAM8A1
1942	3 (Heps)	ENSG00000137449	CPEB2
1943	3 (Heps)	ENSG00000137474	MYO7A
1944	3 (Heps)	ENSG00000137491	SLCO2B1
1945	3 (Heps)	ENSG00000137767	SQOR
1946	3 (Heps)	ENSG00000137801	THBS1
1947	3 (Heps)	ENSG00000137825	ITPKA
1948	3 (Heps)	ENSG00000137842	TMEM62
1949	3 (Heps)	ENSG00000137960	GIPC2
1950	3 (Heps)	ENSG00000137962	ARHGAP29
1951	3 (Heps)	ENSG00000138029	HADHB
1952	3 (Heps)	ENSG00000138308	PLA2G12B
1953	3 (Heps)	ENSG00000138434	ITPRID2
1954	3 (Heps)	ENSG00000138449	SLC40A1
1955	3 (Heps)	ENSG00000138496	PARP9
1956	3 (Heps)	ENSG00000138600	SPPL2A
1957	3 (Heps)	ENSG00000138639	ARHGAP24
1958	3 (Heps)	ENSG00000138641	HERC3
1959	3 (Heps)	ENSG00000138744	NAAA
1960	3 (Heps)	ENSG00000138760	SCARB2
1961	3 (Heps)	ENSG00000139182	CLSTN3
1962	3 (Heps)	ENSG00000139631	CSAD
1963	3 (Heps)	ENSG00000139793	MBNL2
1964	3 (Heps)	ENSG00000139832	RAB20
1965	3 (Heps)	ENSG00000140263	SORD
1966	3 (Heps)	ENSG00000140374	ETFA
1967	3 (Heps)	ENSG00000140398	NEIL1
1968	3 (Heps)	ENSG00000140479	PCSK6
1969	3 (Heps)	ENSG00000140564	FURIN
1970	3 (Heps)	ENSG00000140836	ZFHX3
1971	3 (Heps)	ENSG00000140853	NLRC5
1972	3 (Heps)	ENSG00000140859	KIFC3
1973	3 (Heps)	ENSG00000140939	NOL3
1974	3 (Heps)	ENSG00000141179	PCTP
1975	3 (Heps)	ENSG00000141232	TOB1
1976	3 (Heps)	ENSG00000141448	GATA6
1977	3 (Heps)	ENSG00000141485	SLC13A5
1978	3 (Heps)	ENSG00000141753	IGFBP4
1979	3 (Heps)	ENSG00000141905	NFIC
1980	3 (Heps)	ENSG00000142178	SIK1
1981	3 (Heps)	ENSG00000142227	EMP3
1982	3 (Heps)	ENSG00000142484	TM4SF5
1983	3 (Heps)	ENSG00000142677	IL22RA1
1984	3 (Heps)	ENSG00000142871	CCN1
1985	3 (Heps)	ENSG00000143036	SLC44A3
1986	3 (Heps)	ENSG00000143153	ATP1B1
1987	3 (Heps)	ENSG00000143158	MPC2
1988	3 (Heps)	ENSG00000143164	DCAF6
1989	3 (Heps)	ENSG00000143199	ADCY10
1990	3 (Heps)	ENSG00000143278	F13B
1991	3 (Heps)	ENSG00000143344	RGL1
1992	3 (Heps)	ENSG00000143369	ECM1
1993	3 (Heps)	ENSG00000143382	ADAMTSL4
1994	3 (Heps)	ENSG00000143412	ANXA9
1995	3 (Heps)	ENSG00000143418	CERS2
1996	3 (Heps)	ENSG00000143499	SMYD2
1997	3 (Heps)	ENSG00000143669	LYST
1998	3 (Heps)	ENSG00000143995	MEIS1
[truncated: 1,379 more rows]
