# Supplementary material for: Generation of functional hepatocytes by forward programming with nuclear receptors
Source: eLife. 2022 Aug 12;11:e71591. doi: 10.7554/eLife.71591 (PMC9374437; doi:10.7554/eLife.71591)
Supplement: Figure 3—source data 1. [file elife-71591-fig3-data1.xlsx]

## Sheet: Sheet1
Source data 1. Peak annotation results for PHH-unique H3K27ac regions
	seqnames	start	end	width	annotation	gene Start	gene End	gene Length	gene ID	transcript ID	symbol	distance To TSS
1	chr20	57160598	57160840	243	Distal Intergenic	57170917	57173589	2673	655	ENST00000476877.1	BMP7	12749
2	chr10	95385218	95385698	481	Promoter (<=1kb)	95381413	95384285	2873	10580	ENST00000472854.5	SORBS1	-933
3	chr2	187854061	187854474	414	Intron (ENST00000434418.2/104355152, intron 3 of 3)	187496881	187565760	68880	7035	ENST00000421427.5	TFPI	-288301
4	chr17	17004352	17004594	243	Distal Intergenic	16988329	16990177	1849	105371562	ENST00000419151.2	LINC02090	16023
5	chr14	50542255	50544559	2305	5' UTR	50533026	50633049	100024	51062	ENST00000441560.6	ATL1	9229
6	chr2	222677783	222678091	309	Exon (ENST00000412747.1/ENST00000412747.1, exon 1 of 1)	222671786	222709930	38145	116255	ENST00000446656.3	MOGAT1	5997
7	chr12	23770754	23772778	2025	Intron (ENST00000546136.5/6660, intron 2 of 13)	23575813	23738506	162694	6660	ENST00000536629.5	SOX5	-32248
8	chr8	35105720	35108409	2690	Distal Intergenic	35235457	35790625	555169	137970	ENST00000404895.6	UNC5D	-127048
9	chr16	67758496	67764615	6120	3' UTR	67674533	67719421	44889	81577	ENST00000268797.11	GFOD2	-39075
10	chr9	34339051	34339477	427	Exon (ENST00000346365.8/318, exon 3 of 4)	34329506	34343713	14208	318	ENST00000379158.6	NUDT2	9545
11	chr4	128073084	128073326	243	Intron (ENST00000326639.10/55132, intron 1 of 19)	128077841	128122352	44512	55132	ENST00000507377.1	LARP1B	-4515
12	chr13	113201407	113201649	243	Promoter (<=1kb)	113196197	113200673	4477	55795	ENST00000462853.1	PCID2	-734
13	chr20	41302294	41302684	391	Promoter (2-3kb)	41268990	41300127	31138	23051	ENST00000559028.5	ZHX3	-2167
14	chr18	46428906	46429328	423	Intron (ENST00000593230.5/494470, intron 1 of 4)	46447447	46456067	8621	494470	ENST00000592777.1	RNF165	-18119
15	chr7	17440007	17440313	307	Intron (ENST00000637807.1/196, intron 10 of 11)	17406073	17466538	60466	102659288	ENST00000636703.1	KCCAT333	33934
16	chr7	41436631	41438700	2070	Distal Intergenic	41689516	41692564	3049	3624	ENST00000464515.1	INHBA	253864
17	chr15	45443839	45451581	7743	Promoter (<=1kb)	45450118	45513767	63650	283651	ENST00000560647.5	HMGN2P46	0
18	chr9	17799546	17800551	1006	Distal Intergenic	17906563	18533292	626730	92949	ENST00000636209.1	ADAMTSL1	-106012
19	chr20	25280661	25280903	243	Intron (ENST00000216962.8/5834, intron 10 of 19)	25289848	25296468	6621	5834	ENST00000428458.1	PYGB	-8945
20	chr8	132951485	132952419	935	Intron (ENST00000220616.8/7038, intron 27 of 47)	132962994	132967897	4904	7038	ENST00000518058.1	TG	-10575
21	chr18	6315495	6317028	1534	Intron (ENST00000400105.6/91133, intron 1 of 19)	6239799	6326721	86923	91133	ENST00000583054.5	L3MBTL4	9693
22	chr12	42166866	42167362	497	Intron (ENST00000327791.8/10138, intron 3 of 4)	42081845	42144879	63035	283464	ENST00000398675.7	GXYLT1	-21987
23	chr3	126542683	126542925	243	3' UTR	126526999	126558965	31967	152065	ENST00000505070.5	C3orf22	16040
24	chr6	108743268	108745637	2370	Distal Intergenic	108751654	108768456	16803	387111	ENST00000416104.5	LINC00222	-6017
25	chr1	200472859	200473417	559	Intron (ENST00000637430.1/ENST00000637430.1, intron 4 of 5)	200404940	200410056	5117	23528	ENST00000294740.3	ZNF281	-62803
26	chr17	67417075	67418367	1293	Intron (ENST00000299954.13/26207, intron 1 of 8)	67378966	67578225	199260	26207	ENST00000584471.5	PITPNC1	38109
27	chr22	38750741	38752569	1829	Promoter (<=1kb)	38749766	38751441	1676	25777	ENST00000480307.1	SUN2	0
28	chr7	11227126	11229638	2513	Exon (ENST00000599917.5/ENST00000599917.5, exon 6 of 6)	11110981	11169623	58643	9678	ENST00000473050.1	PHF14	116145
29	chr6	108893670	108894047	378	Intron (ENST00000368972.7/84071, intron 4 of 16)	108868978	108880256	11279	84071	ENST00000414610.1	ARMC2	24692
30	chr2	193146534	193147057	524	Distal Intergenic	192749967	192776068	26102	64002	ENST00000606314.1	PCGEM1	396567
31	chr19	33519016	33520034	1019	Promoter (1-2kb)	33387024	33521788	134765	5184	ENST00000436370.7	PEPD	1754
32	chr6	136506288	136518815	12528	Intron (ENST00000617204.4/9053, intron 1 of 17)	136343819	136525983	182165	9053	ENST00000438100.6	MAP7	7168
33	chr1	56801218	56801584	367	Intron (ENST00000343433.6/199920, intron 1 of 19)	56718804	56819371	100568	199920	ENST00000343433.6	FYB2	17787
34	chr2	229118637	229118879	243	Intron (ENST00000482518.6/55022, intron 2 of 2)	229025577	229232085	206509	55022	ENST00000354069.6	PID1	113206
35	chr17	71041660	71044113	2454	Distal Intergenic	71097775	71202177	104403	101928165	ENST00000569074.1	CASC17	158064
36	chr8	28058416	28058658	243	Intron (ENST00000413272.6/389643, intron 8 of 18)	28069643	28083850	14208	389643	ENST00000418860.1	NUGGC	25192
37	chr5	141996679	141997844	1166	Intron (ENST00000513454.5/10007, intron 6 of 6)	142003218	142005441	2224	10007	ENST00000515747.1	GNPDA1	7597
38	chr1	241584374	241584616	243	Intron (ENST00000366558.7/8564, intron 10 of 14)	241568635	241593459	24825	8564	ENST00000366555.5	KMO	15739
39	chr17	55726364	55728081	1718	5' UTR	55721463	55723024	1562	55273	ENST00000575685.1	TMEM100	-3340
40	chr2	88013795	88014037	243	Distal Intergenic	87980714	87992858	12145	400966	ENST00000617314.1	RGPD1	-20937
41	chr18	3088079	3089311	1233	Promoter (1-2kb)	3075738	3090766	15029	8736	ENST00000581075.1	MYOM1	1455
42	chr17	19681635	19682234	600	3' UTR	19672352	19675880	3529	224	ENST00000574597.1	ALDH3A2	9283
43	chr13	109649484	109649726	243	Intron (ENST00000650264.1/ENST00000650264.1, intron 1 of 3)	109728282	109730007	1726	101409253	ENST00000416090.1	LINC00676	-78556
44	chr5	113196488	113197806	1319	Intron (ENST00000302475.8/4163, intron 1 of 16)	113101734	113203317	101584	4163	ENST00000506605.6	MCC	5511
45	chr13	49462330	49462572	243	Promoter (2-3kb)	49459908	49495002	35095	83852	ENST00000611815.1	SETDB2	2422
46	chr2	75676843	75678267	1425	Intron (ENST00000358788.10/9801, intron 4 of 5)	75664418	75670214	5797	6936	ENST00000492826.1	GCFC2	-6629
47	chr1	56946944	56947532	589	Intron (ENST00000371237.8/732, intron 6 of 11)	56931594	56933381	1788	732	ENST00000465658.1	C8B	-13563
48	chr10	30990918	30992985	2068	Intron (ENST00000413025.5/220929, intron 1 of 5)	30844634	30984426	139793	220929	ENST00000361310.7	ZNF438	-6492
49	chr10	11521392	11526309	4918	Exon (ENST00000609104.5/9712, exon 4 of 15)	11460510	11532275	71766	9712	ENST00000277575.5	USP6NL	5966
50	chr12	27971415	27971744	330	Promoter (<=1kb)	27958084	27971970	13887	5744	ENST00000395872.5	PTHLH	226
51	chr17	16323665	16323907	243	Intron (ENST00000581006.5/9487, intron 3 of 3)	16317391	16325904	8514	9487	ENST00000488375.2	PIGL	6274
52	chr18	21469108	21469646	539	Intron (ENST00000424526.5/80000, intron 15 of 32)	21485369	21490231	4863	80000	ENST00000578383.1	GREB1L	-15723
53	chr9	17240614	17241222	609	Intron (ENST00000380647.7/54875, intron 5 of 25)	17135040	17302051	167012	54875	ENST00000380641.4	CNTLN	105574
54	chr22	46983801	46986531	2731	Intron (ENST00000380995.5/25771, intron 10 of 13)	46914092	46916042	1951	642757	ENST00000640274.1	TBC1D22A-AS1	-67759
55	chr5	70141295	70141662	368	Distal Intergenic	70094659	70128434	33776	11039	ENST00000511830.2	SMA4	-12861
56	chr17	17150669	17157655	6987	Promoter (<=1kb)	17154352	17185235	30884	23164	ENST00000579832.1	MPRIP	0
57	chr2	88172617	88173664	1048	Promoter (<=1kb)	88173273	88177141	3869	55258	ENST00000475910.1	THNSL2	0
58	chr6	100901072	100901408	337	Distal Intergenic	100647288	100881372	234085	10973	ENST00000324696.8	ASCC3	-19700
59	chr5	115747903	115751994	4092	Intron (ENST00000512900.2/ENST00000512900.2, intron 2 of 2)	115813182	115814481	1300	1036	ENST00000504877.1	CDO1	62487
60	chr19	45292191	45296013	3823	Promoter (<=1kb)	45294355	45303369	9015	57787	ENST00000622871.1	MARK4	0
61	chr2	119747993	119748826	834	Distal Intergenic	119759631	119983818	224188	5775	ENST00000263708.6	PTPN4	-10805
62	chr5	114441281	114442024	744	Intron (ENST00000512097.8/3781, intron 6 of 10)	114433578	114493442	59865	3781	ENST00000505491.1	KCNN2	7703
63	chr2	229200483	229200861	379	Intron (ENST00000482518.6/55022, intron 1 of 2)	229025577	229232085	206509	55022	ENST00000354069.6	PID1	31224
64	chr2	45255861	45258216	2356	Promoter (<=1kb)	45174344	45254941	80598	400952	ENST00000378479.5	LINC01121	-920
65	chr20	13412751	13413709	959	Intron (ENST00000480436.5/55617, intron 13 of 13)	13237801	13239674	1874	100505536	ENST00000431407.1	ISM1-AS1	-173077
66	chr4	122810188	122810753	566	Distal Intergenic	122826708	122898236	71529	2247	ENST00000264498.7	FGF2	-15955
67	chr18	32099411	32099774	364	Intron (ENST00000583184.1/54941, intron 4 of 4)	32092702	32124769	32068	51444	ENST00000580499.1	RNF138	6709
68	chr16	56623685	56623927	243	Promoter (1-2kb)	56625475	56627112	1638	4493	ENST00000306061.10	MT1E	-1548
69	chr11	128534440	128536743	2304	Exon (ENST00000525404.5/2113, exon 4 of 4)	128526142	128530389	4248	101929517	ENST00000525706.1	ETS1-AS1	8298
70	chr9	30075183	30075425	243	Distal Intergenic	30388935	30575012	186078	401497	ENST00000629369.1	LINC01242	499587
71	chr1	99665929	99666171	243	Intron (ENST00000263174.8/54873, intron 2 of 7)	99683266	99694541	11276	54873	ENST00000496843.1	PALMD	-17095
72	chr19	4520617	4522406	1790	Promoter (2-3kb)	4502192	4518465	16274	729359	ENST00000633942.1	PLIN4	-2152
73	chr1	20620955	20621337	383	Distal Intergenic	20633455	20651511	18057	65018	ENST00000321556.4	PINK1	-12118
74	chr8	96614551	96615296	746	Distal Intergenic	96586387	96609465	23079	6383	ENST00000523877.1	SDC2	28164
75	chr3	40099876	40100698	823	Promoter (<=1kb)	40100011	40167224	67214	25924	ENST00000482033.5	MYRIP	0
76	chr7	40454381	40459242	4862	Exon (ENST00000401647.6/79783, exon 10 of 13)	40274511	40388158	113648	79783	ENST00000488110.1	SUGCT	179870
77	chr1	149099040	149099282	243	Intron (ENST00000615421.4/400818, intron 1 of 28)	149054027	149103539	49513	400818	ENST00000615421.4	NBPF9	4257
78	chr11	130863532	130867339	3808	Promoter (<=1kb)	130844191	130865561	21371	100507431	ENST00000533812.6	LINC02551	0
79	chr16	10557480	10560840	3361	Promoter (<=1kb)	10532849	10559154	26306	2013	ENST00000536829.1	EMP2	0
80	chr2	238297141	238297594	454	Intron (ENST00000637634.1/ENST00000637634.1, intron 2 of 3)	238275863	238290102	14240	8864	ENST00000431832.1	PER2	-7039
81	chr16	30618721	30618963	243	Intron (ENST00000565440.5/115509, intron 1 of 2)	30604618	30623948	19331	115509	ENST00000565440.5	ZNF689	4985
82	chr17	794235	794668	434	Distal Intergenic	800388	803984	3597	64359	ENST00000571281.1	NXN	9316
83	chr13	75414257	75419529	5273	Intron (ENST00000377625.6/9882, intron 1 of 18)	75283503	75367015	83513	9882	ENST00000648194.1	TBC1D4	-47242
84	chr1	109649500	109649943	444	Distal Intergenic	109656081	109661700	5620	2948	ENST00000369836.8	GSTM4	-6138
85	chr5	113072238	113072480	243	Intron (ENST00000302475.8/4163, intron 9 of 16)	113048563	113064040	15478	4163	ENST00000624689.3	MCC	-8198
86	chr6	126378549	126378791	243	Distal Intergenic	126340174	126348875	8702	387103	ENST00000368328.4	CENPW	38375
87	chr6	121430048	121430290	243	Distal Intergenic	121435577	121449727	14151	2697	ENST00000649132.1	GJA1	-5287
88	chr1	97338588	97339131	544	Intron (ENST00000370192.7/1806, intron 16 of 22)	97265446	97296147	30702	100873932	ENST00000630798.1	DPYD-AS1	73142
89	chr15	97976208	97980534	4327	Distal Intergenic	97960698	97973838	13141	91947	ENST00000268042.6	ARRDC4	15510
90	chr18	36135044	36135286	243	Promoter (1-2kb)	36137174	36142947	5774	55250	ENST00000543439.5	ELP2	-1888
91	chr10	14052170	14052513	344	Intron (ENST00000357447.6/55691, intron 2 of 24)	14074284	14087605	13322	101928453	ENST00000451617.1	LOC101928453	-21771
92	chr2	240985505	240988380	2876	Exon (ENST00000425110.1/ENST00000425110.1, exon 1 of 2)	240998838	241073986	75149	25992	ENST00000401884.5	SNED1	-10458
93	chr11	84257337	84257654	318	Intron (ENST00000280241.12/1740, intron 1 of 21)	83459422	84273188	813767	1740	ENST00000330014.11	DLG2	15534
94	chr2	234073632	234073874	243	Intron (ENST00000373368.5/6694, intron 7 of 7)	234050837	234056278	5442	6694	ENST00000492481.1	SPP2	22795
95	chr6	5139723	5139965	243	Intron (ENST00000330636.8/57128, intron 2 of 2)	5108728	5132894	24167	57128	ENST00000458438.2	LYRM4	-6829
96	chr14	92527433	92528740	1308	Intron (ENST00000216487.11/79890, intron 1 of 9)	92513804	92515507	1704	79890	ENST00000557762.1	RIN3	13629
97	chr3	45487033	45488880	1848	Exon (ENST00000265537.7/23395, exon 12 of 22)	45500541	45538463	37923	23395	ENST00000467936.5	LARS2	-11661
98	chr17	28261070	28261391	322	Intron (ENST00000578466.1/ENST00000578466.1, intron 1 of 1)	28247444	28248289	846	23614	ENST00000583761.1	PPY2P	13626
99	chr6	159927036	159927556	521	Distal Intergenic	159906690	159916530	9841	4142	ENST00000252660.5	MAS1	20346
100	chr15	74657041	74657973	933	Promoter (1-2kb)	74635181	74655893	20713	80153	ENST00000562174.5	EDC3	-1148
101	chr15	32694536	32695485	950	Intron (ENST00000300175.8/6447, intron 5 of 5)	32684440	32697096	12657	6447	ENST00000475752.1	SCG5	10096
102	chr7	106617571	106617813	243	Intron (ENST00000490856.5/ENST00000490856.5, intron 1 of 4)	106656765	106660996	4232	168455	ENST00000523505.1	CCDC71L	43183
103	chr5	71430126	71430368	243	Intron (ENST00000502659.2/102724392, intron 1 of 1)	71353487	71446336	92850	102724392	ENST00000517705.1	LINC02197	15968
104	chr8	85926020	85926330	311	Intron (ENST00000518266.1/ENST00000518266.1, intron 1 of 1)	85826953	85828467	1515	100288527	ENST00000603433.2	REXO1L2P	-97553
105	chr10	106010302	106013443	3142	Distal Intergenic	106140264	106188722	48459	105378470	ENST00000449761.5	LINC02624	-126821
106	chr9	71769854	71771408	1555	Promoter (<=1kb)	71683366	71768884	85519	23670	ENST00000377044.8	CEMIP2	-970
107	chr14	93163016	93163258	243	Distal Intergenic	93182199	93184923	2725	64112	ENST00000556883.1	MOAP1	21665
108	chr3	9777604	9782524	4921	3' UTR	9779967	9788083	8117	10474	ENST00000492103.1	TADA3	5559
109	chr12	108871496	108872151	656	Intron (ENST00000548052.5/1610, intron 1 of 3)	108880030	108901043	21014	1610	ENST00000228476.7	DAO	-7879
110	chr12	18150420	18151133	714	Intron (ENST00000540148.5/79785, intron 1 of 4)	18081218	18202070	120853	79785	ENST00000540148.5	RERGL	50937
111	chr8	29014733	29016039	1307	Intron (ENST00000287701.14/79618, intron 5 of 9)	29046300	29050654	4355	79618	ENST00000517386.1	HMBOX1	-30261
112	chr17	18321696	18324618	2923	3' UTR	18315310	18328055	12746	140775	ENST00000406438.4	SMCR8	6386
113	chr11	69360486	69361846	1361	Intron (ENST00000544781.5/ENST00000544781.5, intron 2 of 2)	69425690	69429621	3932	102724265	ENST00000545202.1	LOC102724265	-63844
114	chr14	59185995	59186533	539	Promoter (2-3kb)	59188646	59266161	77516	23002	ENST00000556596.1	DAAM1	-2113
115	chr8	25363945	25368114	4170	3' UTR	25351393	25364777	13385	80005	ENST00000481728.2	DOCK5	12552
116	chr12	47003304	47008183	4880	Distal Intergenic	47079603	47236660	157058	91523	ENST00000546455.5	PCED1B	-71420
117	chr6	143195078	143195565	488	Intron (ENST00000367601.8/51390, intron 4 of 5)	143164944	143187814	22871	51390	ENST00000470265.1	AIG1	30134
118	chr20	3520477	3520719	243	Intron (ENST00000262919.9/8455, intron 1 of 28)	3471108	3615947	144840	8455	ENST00000446916.2	ATRN	49369
119	chr9	14186355	14186857	503	Intron (ENST00000380959.7/4781, intron 2 of 8)	14081843	14180802	98960	4781	ENST00000543693.5	NFIB	-5553
120	chr16	4673606	4688810	15205	Promoter (<=1kb)	4680173	4683932	3760	23295	ENST00000592256.5	MGRN1	0
121	chr2	37469960	37471866	1907	Distal Intergenic	37368281	37372799	4519	25797	ENST00000444022.1	QPCT	101679
122	chr15	71311105	71315782	4678	Intron (ENST00000355327.7/79875, intron 6 of 17)	71167008	71189042	22035	101929196	ENST00000569258.1	THSD4-AS1	-122063
123	chr11	84106577	84107125	549	Intron (ENST00000280241.12/1740, intron 3 of 21)	83980561	84167002	186442	1740	ENST00000524941.5	DLG2	59877
124	chr14	89277830	89278134	305	Intron (ENST00000345097.8/1112, intron 4 of 6)	89180759	89223342	42584	1112	ENST00000555010.1	FOXN3	-54488
125	chr10	106026722	106028367	1646	Distal Intergenic	106140264	106188722	48459	105378470	ENST00000449761.5	LINC02624	-111897
126	chr1	52979669	52980108	440	Intron (ENST00000371514.7/6342, intron 9 of 15)	52963641	52988080	24440	6342	ENST00000473584.1	SCP2	16028
127	chr17	54880476	54884403	3928	Distal Intergenic	54899387	54937316	37930	10040	ENST00000570371.5	TOM1L1	-14984
128	chr7	73633223	73634766	1544	Distal Intergenic	73597645	73624543	26899	51085	ENST00000453275.1	MLXIPL	-8680
129	chr6	42961898	42962259	362	Promoter (1-2kb)	42960758	42963880	3123	27232	ENST00000372808.3	GNMT	1140
130	chr2	216063256	216063606	351	Promoter (2-3kb)	216039256	216066523	27268	55825	ENST00000461330.5	PECR	2917
131	chr17	76192507	76192749	243	Intron (ENST00000269391.10/114804, intron 2 of 18)	76162761	76167082	4322	114804	ENST00000591615.1	RNF157	-25425
132	chr9	72233080	72233924	845	Intron (ENST00000545168.5/9615, intron 10 of 13)	72227997	72252224	24228	9615	ENST00000436438.1	GDA	5083
133	chr19	33410842	33412004	1163	Exon (ENST00000244137.11/5184, exon 11 of 15)	33386955	33395148	8194	5184	ENST00000591968.1	PEPD	-15694
134	chr7	108611332	108611645	314	Intron (ENST00000440208.1/ENST00000440208.1, intron 3 of 3)	108571715	108574760	3046	4189	ENST00000465725.1	DNAJB9	39617
135	chr13	98454113	98455648	1536	3' UTR	98455421	98463785	8365	8428	ENST00000418038.5	STK24	8137
136	chr7	113459595	113461543	1949	Distal Intergenic	113116718	113118613	1896	401397	ENST00000397764.7	SMIM30	-340982
137	chr5	167378325	167381707	3383	Intron (ENST00000518659.5/57451, intron 2 of 28)	167284799	168262996	978198	57451	ENST00000518659.5	TENM2	93526
138	chr9	86318590	86320285	1696	Promoter (<=1kb)	86287735	86319644	31910	79670	ENST00000375957.5	TUT7	0
139	chrX	67038225	67038665	441	Distal Intergenic	66595642	66639298	43657	60401	ENST00000451436.6	EDA2R	-398927
140	chr7	100629138	100629380	243	Promoter (1-2kb)	100626553	100627604	1052	7036	ENST00000461176.1	TFR2	-1534
141	chr6	63647124	63652115	4992	Promoter (<=1kb)	63646526	63714509	67984	23469	ENST00000393387.5	PHF3	598
142	chr8	27511496	27512045	550	Exon (ENST00000521400.5/2053, exon 6 of 19)	27515463	27522487	7025	2053	ENST00000523326.1	EPHX2	-3418
143	chr1	171087462	171089005	1544	Promoter (1-2kb)	171090877	171117819	26943	2328	ENST00000367755.8	FMO3	-1872
144	chr4	167622988	167623230	243	Distal Intergenic	166733388	167234796	501409	50859	ENST00000506886.5	SPOCK3	-388192
145	chr12	20820205	20822620	2416	Intron (ENST00000540853.5/28234, intron 2 of 7)	20815674	21090245	274572	338821	ENST00000381541.7	SLCO1B7	4531
146	chr18	6355313	6358802	3490	Exon (ENST00000578677.1/ENST00000578677.1, exon 2 of 2)	5954706	6367683	412978	91133	ENST00000400105.6	L3MBTL4	8881
147	chr15	71218125	71218624	500	Intron (ENST00000355327.7/79875, intron 4 of 17)	71167008	71189042	22035	101929196	ENST00000569258.1	THSD4-AS1	-29083
148	chr12	21595279	21596029	751	Intron (ENST00000261195.2/2998, intron 1 of 15)	21536189	21604847	68659	2998	ENST00000261195.2	GYS2	8818
149	chr21	31709022	31713601	4580	Intron (ENST00000286835.11/57466, intron 1 of 19)	31683995	31701823	17829	57466	ENST00000467731.1	SCAF4	-7199
150	chr4	155780055	155780489	435	Intron (ENST00000505154.5/2983, intron 3 of 12)	155759459	155806824	47366	2983	ENST00000513437.1	GUCY1B1	20596
151	chrX	82087526	82088438	913	Distal Intergenic	81255494	81297516	42023	6451	ENST00000474113.1	SH3BGRL	832032
152	chr19	6695513	6695997	485	Promoter (1-2kb)	6696614	6697715	1102	718	ENST00000594005.1	C3	1718
153	chr13	20811010	20811313	304	Intron (ENST00000255305.10/64328, intron 9 of 22)	20757229	20773958	16730	221143	ENST00000460374.1	EEF1AKMT1	-37052
154	chr7	27279808	27280138	331	Distal Intergenic	27241429	27247229	5801	101410536	ENST00000517726.1	EVX1-AS	-32579
155	chr16	85947764	85948006	243	Exon (ENST00000646214.1/ENST00000646214.1, exon 3 of 4)	85918347	85918416	70	102466732	ENST00000614651.1	MIR6774	29417
156	chr3	151918469	151920137	1669	Intron (ENST00000483843.6/101928142, intron 1 of 4)	151751443	151928168	176726	101928142	ENST00000483843.6	AADACL2-AS1	8031
157	chr1	16884365	16884896	532	Intron (ENST00000466256.6/9696, intron 1 of 8)	16888538	16889373	836	105376805	ENST00000422124.1	LOC105376805	4477
158	chr8	104443879	104444190	312	Promoter (<=1kb)	104429147	104444368	15222	1807	ENST00000519217.1	DPYS	178
159	chr12	110541883	110546744	4862	Promoter (<=1kb)	110536769	110546769	10001	160760	ENST00000548721.1	PPTC7	25
160	chr7	155963701	155964102	402	Promoter (1-2kb)	155962632	155966343	3712	389602	ENST00000377722.2	LOC389602	1069
161	chr11	134402909	134403297	389	Intron (ENST00000392580.5/27087, intron 1 of 6)	134383999	134409881	25883	27087	ENST00000531510.1	B3GAT1	6584
162	chr4	82542165	82543636	1472	Intron (ENST00000515780.6/441027, intron 1 of 7)	82490085	82561955	71871	441027	ENST00000508701.5	TMEM150C	18319
163	chr20	6010822	6011125	304	Promoter (1-2kb)	6009779	6034523	24745	54675	ENST00000489345.5	CRLS1	1043
164	chr12	56839155	56840984	1830	Exon (ENST00000611595.1/ENST00000611595.1, exon 1 of 1)	56785929	56787345	1417	8630	ENST00000553476.1	HSD17B6	53226
165	chr22	26502651	26502893	243	Intron (ENST00000619735.4/24144, intron 5 of 12)	26499537	26506105	6569	24144	ENST00000496523.5	TFIP11	3212
166	chr8	63006255	63006559	305	Distal Intergenic	63015429	63017970	2542	8836	ENST00000522852.1	GGH	11411
167	chr8	85925417	85925720	304	Intron (ENST00000518266.1/ENST00000518266.1, intron 1 of 1)	85826953	85828467	1515	100288527	ENST00000603433.2	REXO1L2P	-96950
168	chr7	108891251	108892142	892	Distal Intergenic	108883975	108884587	613	154907	ENST00000624695.1	C7orf66	-6664
169	chr5	76416816	76417889	1074	Intron (ENST00000274364.10/10788, intron 1 of 35)	76404424	76665051	260628	10788	ENST00000514350.5	IQGAP2	12392
170	chr1	196734314	196735725	1412	Promoter (1-2kb)	196736908	196741086	4179	3075	ENST00000470918.1	CFH	-1183
171	chr22	21717438	21717828	391	Intron (ENST00000339468.7/29799, intron 1 of 4)	21704082	21735755	31674	29799	ENST00000403503.1	YPEL1	17927
172	chr2	224882993	224884345	1353	Promoter (1-2kb)	224874700	224886254	11555	55619	ENST00000543715.1	DOCK10	1909
173	chr3	197474524	197474766	243	Distal Intergenic	197505262	197506986	1725	100129516	ENST00000608206.1	LINC02012	32220
174	chr8	22633277	22635168	1892	3' UTR	22620436	22626542	6107	55909	ENST00000520489.5	BIN3	-6735
175	chrX	111861434	111861745	312	Intron (ENST00000262839.2/7224, intron 3 of 10)	111876051	111902208	26158	100329135	ENST00000612026.5	TRPC5OS	-14306
176	chr4	82539502	82539890	389	Intron (ENST00000515780.6/441027, intron 1 of 7)	82490085	82561955	71871	441027	ENST00000508701.5	TMEM150C	22065
177	chr7	100131215	100131868	654	Intron (ENST00000376482.3/ENST00000376482.3, intron 1 of 1)	100126785	100127736	952	255374	ENST00000421390.1	MBLAC1	4430
178	chr1	161244394	161246271	1878	Distal Intergenic	161229666	161238302	8637	9970	ENST00000367983.8	NR1I3	-6092
179	chr1	44655836	44656848	1013	Intron (ENST00000372242.7/79639, intron 2 of 4)	44648308	44651723	3416	55182	ENST00000474956.1	RNF220	7528
180	chr3	186621648	186621890	243	Intron (ENST00000630178.2/ENST00000630178.2, intron 2 of 2)	186613085	186617989	4905	197	ENST00000478441.1	AHSG	8563
181	chr11	130907688	130907995	308	Promoter (<=1kb)	130877958	130908346	30389	399979	ENST00000534726.5	SNX19	351
182	chr8	27082143	27085902	3760	Distal Intergenic	27048853	27048963	111	100313884	ENST00000408689.1	MIR548H4	-33180
183	chr9	109821645	109821887	243	Intron (ENST00000374531.6/114299, intron 2 of 6)	109780456	110169909	389454	445815	ENST00000302798.7	PALM2-AKAP2	41189
184	chr5	138582966	138583208	243	Distal Intergenic	138553756	138575724	21969	3313	ENST00000649126.1	HSPA9	-7242
185	chr5	35097694	35098121	428	Intron (ENST00000509140.5/5618, intron 1 of 8)	35048772	35089637	40866	5618	ENST00000618625.4	PRLR	-8057
186	chr18	3165630	3165872	243	Intron (ENST00000356443.8/8736, intron 9 of 37)	3135058	3142019	6962	8736	ENST00000577294.1	MYOM1	-23611
187	chr1	97886786	97887028	243	Intron (ENST00000370192.7/1806, intron 1 of 22)	97855030	97920997	65968	1806	ENST00000460019.1	DPYD	33969
188	chr10	80534682	80535052	371	Promoter (<=1kb)	80529597	80535942	6346	101929574	ENST00000417559.1	LOC101929574	890
189	chr5	148427657	148427962	306	Promoter (<=1kb)	148427623	148441245	13623	81545	ENST00000505399.2	FBXO38	34
190	chr13	78904224	78904591	368	Distal Intergenic	78787319	78792307	4989	100874126	ENST00000446391.1	LINC00331	-111917
191	chr18	63349060	63350066	1007	Promoter (2-3kb)	63331643	63346616	14974	2531	ENST00000589592.1	KDSR	-2444
192	chr16	1179376	1179618	243	Intron (ENST00000348261.10/8912, intron 2 of 34)	1195029	1198934	3906	8912	ENST00000564954.1	CACNA1H	-15411
193	chr11	118835518	118836045	528	Exon (ENST00000364665.2/ENST00000364665.2, exon 1 of 1)	118785833	118791149	5317	1656	ENST00000533239.1	DDX6	-44369
194	chr14	92609402	92609768	367	Intron (ENST00000216487.11/79890, intron 3 of 9)	92615473	92645190	29718	79890	ENST00000554888.1	RIN3	-5705
195	chr7	70634726	70635803	1078	Intron (ENST00000644939.1/26053, intron 5 of 18)	70596085	70792485	196401	26053	ENST00000644506.1	AUTS2	38641
196	chr13	111621229	111621597	369	Intron (ENST00000375713.1/ENST00000375713.1, intron 1 of 3)	111596009	111642079	46071	105370369	ENST00000401043.3	LINC02337	25220
197	chr17	14277612	14278036	425	Distal Intergenic	14301083	14349144	48062	9953	ENST00000466596.5	HS3ST3B1	-23047
198	chr6	71375272	71376408	1137	Promoter (<=1kb)	71376960	71377031	72	407032	ENST00000362224.3	MIR30C2	623
199	chr11	111959170	111962771	3602	Intron (ENST00000529225.5/85458, intron 2 of 5)	111976906	111989055	12150	85458	ENST00000614104.4	DIXDC1	-14135
200	chr3	26714859	26715940	1082	3' UTR	26694555	26710776	16222	116135	ENST00000456208.2	LRRC3B	20304
201	chr6	23434947	23437165	2219	Distal Intergenic	24126122	24147411	21290	140767	ENST00000378491.8	NRSN1	-688957
202	chr4	15739721	15742003	2283	Distal Intergenic	15715328	15738313	22986	683	ENST00000514989.1	BST1	24393
203	chr5	67804660	67804902	243	Exon (ENST00000504068.1/101928858, exon 3 of 3)	67797345	67800077	2733	101928858	ENST00000509947.1	LOC101928858	7315
204	chr18	6328467	6329008	542	Promoter (1-2kb)	6239799	6326721	86923	91133	ENST00000583054.5	L3MBTL4	-1746
205	chr6	101015896	101016928	1033	Distal Intergenic	100647288	100881372	234085	10973	ENST00000324696.8	ASCC3	-134524
206	chr1	161231527	161231829	303	Promoter (<=1kb)	161229680	161231329	1650	9970	ENST00000479324.1	NR1I3	-198
207	chr11	114066838	114068421	1584	Promoter (2-3kb)	114064412	114247344	182933	7704	ENST00000539918.5	ZBTB16	2426
208	chr5	66972099	66973320	1222	Intron (ENST00000403625.6/375449, intron 4 of 28)	66958988	67090203	131216	375449	ENST00000432426.5	MAST4	13111
209	chr5	42823447	42826493	3047	Promoter (<=1kb)	42800131	42825896	25766	6414	ENST00000506577.5	SELENOP	0
210	chr12	3126049	3126755	707	Intron (ENST00000537971.5/10867, intron 1 of 7)	3077428	3084210	6783	10867	ENST00000539631.1	TSPAN9	48621
211	chr3	67528382	67530113	1732	Promoter (<=1kb)	67374719	67528222	153504	8801	ENST00000460567.5	SUCLG2	-160
212	chr8	1897272	1897514	243	Intron (ENST00000635855.1/9639, intron 15 of 29)	1904235	1923490	19256	9639	ENST00000524212.1	ARHGEF10	-6721
213	chr5	79064788	79065682	895	Intron (ENST00000255189.7/29958, intron 1 of 15)	79051287	79069626	18340	29958	ENST00000524206.1	DMGDH	3944
214	chr7	157392143	157392385	243	Intron (ENST00000262177.8/10049, intron 8 of 9)	157381821	157382743	923	10049	ENST00000486247.1	DNAJB6	10322
215	chr15	71317331	71321567	4237	Intron (ENST00000355327.7/79875, intron 6 of 17)	71167008	71189042	22035	101929196	ENST00000569258.1	THSD4-AS1	-128289
216	chr7	76517847	76518238	392	Distal Intergenic	76511535	76514048	2514	105375355	ENST00000469114.1	UPK3B	6312
217	chr1	101106940	101107182	243	Distal Intergenic	101082454	101087261	4808	102606465	ENST00000451213.1	LOC102606465	24486
218	chr18	13314968	13315210	243	Intron (ENST00000590371.5/753, intron 2 of 2)	13278103	13652754	374652	753	ENST00000359446.9	LDLRAD4	36865
219	chr7	80400877	80402304	1428	Intron (ENST00000435819.5/948, intron 1 of 16)	80373839	80391453	17615	101927269	ENST00000615960.4	LOC101927269	-9424
220	chrX	67581036	67581278	243	Intron (ENST00000396044.7/367, intron 1 of 4)	67568889	67724288	155400	367	ENST00000396043.2	AR	12147
221	chr10	35346110	35347148	1039	Intron (ENST00000490012.6/219771, intron 6 of 9)	35337052	35553183	216132	219771	ENST00000492478.5	CCNY	9058
222	chr11	76754672	76754914	243	Distal Intergenic	76782251	76796068	13818	25987	ENST00000533752.1	TSKU	-27337
223	chr7	99800196	99800498	303	Distal Intergenic	99757676	99784265	26590	1576	ENST00000336411.6	CYP3A4	-15931
224	chr7	44075104	44077316	2213	Promoter (<=1kb)	44074141	44077026	2886	27434	ENST00000492971.1	POLM	0
225	chrX	145918314	145919852	1539	Distal Intergenic	145992750	145992826	77	102466721	ENST00000516410.2	MIR892C	72974
226	chr3	10439749	10439991	243	Intron (ENST00000397077.6/491, intron 2 of 19)	10326078	10449543	123466	491	ENST00000352432.9	ATP2B2	9552
227	chr8	56067484	56068005	522	3' UTR	56073835	56073901	67	26795	ENST00000459159.1	SNORD54	5896
228	chr15	101621705	101622999	1295	Exon (ENST00000619579.1/ENST00000619579.1, exon 1 of 1)	101613676	101614339	664	101927505	ENST00000618724.1	LINC02348	-7366
229	chr15	89190028	89190364	337	Intron (ENST00000352732.9/11057, intron 8 of 10)	89185415	89193453	8039	11057	ENST00000568308.1	ABHD2	4613
230	chr2	224395522	224396591	1070	Intron (ENST00000389874.3/79843, intron 2 of 2)	224378698	224401994	23297	79843	ENST00000389874.3	FAM124B	5403
231	chr8	9494994	9495678	685	Distal Intergenic	9555914	9710409	154496	8658	ENST00000520408.5	TNKS	-60236
232	chr16	66985011	66985702	692	Promoter (2-3kb)	66988589	67009758	21170	283848	ENST00000540947.6	CES4A	-2887
233	chr3	24544831	24545073	243	Intron (ENST00000630391.1/ENST00000630391.1, intron 2 of 4)	24498625	24499618	994	644990	ENST00000594183.1	THRB-AS1	46206
234	chr6	69730665	69733927	3263	Intron (ENST00000370577.8/55788, intron 7 of 15)	69675974	69749408	73435	55788	ENST00000650473.1	LMBRD1	15481
235	chr12	76391183	76391631	449	Promoter (1-2kb)	76386030	76389984	3955	114882	ENST00000548535.1	OSBPL8	-1199
236	chr8	75329587	75331499	1913	Distal Intergenic	75223703	75324741	101039	101805492	ENST00000522183.1	CASC9	-4846
237	chr3	187635967	187636209	243	Distal Intergenic	187668906	187670399	1494	6750	ENST00000287641.3	SST	34190
238	chr12	80892733	80892975	243	Intron (ENST00000552864.5/8825, intron 1 of 5)	80845564	80889348	43785	8825	ENST00000552093.1	LIN7A	-3385
239	chr16	9045417	9045659	243	Distal Intergenic	9091648	9121640	29993	29035	ENST00000327827.11	C16orf72	-45989
240	chr3	27276567	27280492	3926	Exon (ENST00000474938.1/152110, exon 3 of 3)	27278688	27284901	6214	152110	ENST00000474938.1	NEK10	4409
241	chr4	122760875	122761244	370	Distal Intergenic	122732797	122742465	9669	166379	ENST00000433287.1	BBS12	28078
242	chr22	41541165	41541550	386	Promoter (2-3kb)	41532625	41544386	11762	171568	ENST00000420561.1	POLR3H	2836
243	chr10	92068069	92068311	243	Intron (ENST00000412050.8/22849, intron 9 of 9)	91980520	91982415	1896	9044	ENST00000476401.1	BTAF1	87549
244	chr2	226530422	226531106	685	Distal Intergenic	226658710	226658793	84	100847053	ENST00000582265.1	MIR5702	127687
245	chr17	37264795	37265037	243	Intron (ENST00000616317.4/31, intron 10 of 55)	37247902	37248676	775	31	ENST00000612926.1	ACACA	-16119
246	chr22	42135196	42135438	243	Exon (ENST00000617009.4/ENST00000617009.4, exon 5 of 5)	42132031	42137050	5020	100132273	ENST00000621190.1	NDUFA6-DT	3165
247	chr3	123665852	123666094	243	Intron (ENST00000360772.7/4638, intron 23 of 33)	123666919	123682310	15392	4638	ENST00000511058.1	MYLK	16216
248	chr18	76857046	76857734	689	Intron (ENST00000320610.13/7776, intron 3 of 30)	76851773	76875516	23744	7776	ENST00000583095.1	ZNF236	5273
249	chr7	77381969	77386003	4035	Exon (ENST00000257626.11/54103, exon 7 of 31)	77329527	77406105	76579	54103	ENST00000334003.11	GSAP	20102
250	chr11	57348501	57348743	243	Promoter (1-2kb)	57347424	57350701	3278	5024	ENST00000534820.1	P2RX3	1077
251	chr3	142127842	142129292	1451	Promoter (1-2kb)	141995071	142126370	131300	7029	ENST00000467634.1	TFDP2	-1472
252	chrX	67636086	67636655	570	Intron (ENST00000396044.7/367, intron 1 of 4)	67568889	67724288	155400	367	ENST00000396043.2	AR	67197
253	chr12	73115344	73115649	306	Distal Intergenic	73159190	73208317	49128	101928137	ENST00000550723.1	LINC02444	-43541
254	chr1	59402586	59402897	312	Intron (ENST00000634606.1/55277, intron 4 of 16)	59393208	59626023	232816	55277	ENST00000475949.5	FGGY	9378
255	chr12	21585184	21585426	243	Intron (ENST00000261195.2/2998, intron 1 of 15)	21536189	21604847	68659	2998	ENST00000261195.2	GYS2	19421
256	chr6	152061496	152064803	3308	Intron (ENST00000440973.5/2099, intron 8 of 9)	152121687	152147763	26077	23345	ENST00000478916.5	SYNE1	82960
257	chr20	1929765	1930417	653	Intron (ENST00000400068.7/140885, intron 7 of 8)	1947246	2007517	60272	727993	ENST00000446562.1	PDYN-AS1	-16829
258	chr16	13228854	13229676	823	Intron (ENST00000558583.2/729993, intron 4 of 4)	13082380	13235293	152914	729993	ENST00000566106.1	SHISA9	146474
259	chr17	46985970	46986212	243	Intron (ENST00000571841.1/9570, intron 7 of 9)	46978156	46979248	1093	388394	ENST00000322329.4	RPRML	-6722
260	chr16	79562850	79563218	369	Distal Intergenic	79585843	79599902	14060	4094	ENST00000569649.1	MAF	36684
261	chr17	56826435	56826772	338	Intron (ENST00000397861.6/339210, intron 2 of 7)	56791913	56833896	41984	339210	ENST00000397861.6	C17orf67	7124
262	chr2	43897620	43899235	1616	Promoter (<=1kb)	43888278	43899284	11007	10128	ENST00000419884.5	LRPPRC	49
263	chr4	155848744	155849911	1168	Intron (ENST00000537611.2/51802, intron 4 of 9)	155854738	155905156	50419	6999	ENST00000503634.5	TDO2	-4827
264	chr17	35993128	35993917	790	Intron (ENST00000610751.4/348249, intron 4 of 7)	35996440	35998370	1931	6359	ENST00000614368.1	CCL15	4453
265	chr1	236051355	236051597	243	Intron (ENST00000366595.7/4811, intron 1 of 16)	235975830	236065109	89280	4811	ENST00000366595.7	NID1	13512
266	chr2	164727029	164727380	352	Promoter (2-3kb)	164684825	164725007	40183	22837	ENST00000493868.5	COBLL1	-2022
267	chr3	128705973	128706215	243	Distal Intergenic	128726122	128814796	88675	7879	ENST00000265062.7	RAB7A	-19907
268	chr12	102406268	102409871	3604	Intron (ENST00000635615.1/ENST00000635615.1, intron 4 of 5)	102402247	102415746	13500	3479	ENST00000481539.1	IGF1	5875
269	chr4	113086623	113086865	243	Intron (ENST00000503271.5/287, intron 2 of 30)	113106863	113106955	93	100302188	ENST00000636083.1	MIR1243	-19998
270	chr7	139630181	139630525	345	Intron (ENST00000406875.7/28996, intron 4 of 14)	139583524	139717013	133490	28996	ENST00000342645.7	HIPK2	86488
271	chr11	2385791	2389543	3753	Promoter (<=1kb)	2386057	2396916	10860	975	ENST00000381036.7	CD81	0
272	chr1	166350813	166351734	922	Distal Intergenic	166475772	166490039	14268	105371590	ENST00000426519.1	LINC01675	138305
273	chr17	42091618	42091860	243	Intron (ENST00000436535.4/201181, intron 1 of 8)	42026897	42098479	71583	201181	ENST00000436535.4	ZNF385C	6619
274	chr15	37213510	37213877	368	Distal Intergenic	36891022	37101299	210278	4212	ENST00000340545.9	MEIS2	-112211
275	chrX	28133177	28137396	4220	Distal Intergenic	27977993	27981449	3457	139425	ENST00000441525.3	DCAF8L1	-151728
276	chrX	31909528	31910190	663	Intron (ENST00000359836.5/1756, intron 4 of 33)	31119221	31875373	756153	1756	ENST00000358062.6	DMD	-34155
277	chr8	94893781	94894090	310	Promoter (<=1kb)	94885452	94893590	8139	9134	ENST00000523476.5	CCNE2	-191
278	chr10	58820153	58820457	305	Exon (ENST00000373886.7/80114, exon 20 of 21)	58793535	58814314	20780	80114	ENST00000263103.1	BICC1	26618
279	chr7	151644494	151646432	1939	Intron (ENST00000287878.8/51422, intron 4 of 15)	151568737	151633165	64429	51422	ENST00000476632.1	PRKAG2	-11329
280	chr17	38586666	38587054	389	Intron (ENST00000617146.4/80725, intron 1 of 18)	38541284	38572820	31537	80725	ENST00000621763.4	SRCIN1	-13846
281	chr2	63802685	63802927	243	Intron (ENST00000490935.5/51057, intron 2 of 7)	63484604	63827843	343240	51057	ENST00000490935.5	WDPCP	24916
282	chr3	114816253	114816619	367	Intron (ENST00000357258.8/26137, intron 3 of 9)	114791685	114801177	9493	26137	ENST00000468769.1	ZBTB20	-15076
283	chr3	50579337	50579579	243	Promoter (2-3kb)	50577124	50580676	3553	51409	ENST00000443894.1	HEMK1	2213
284	chr19	4607086	4607557	472	Distal Intergenic	4639518	4655568	16051	126282	ENST00000327473.8	TNFAIP8L1	-31961
285	chr11	12040313	12040555	243	Intron (ENST00000531559.1/105376554, intron 1 of 1)	12030875	12061785	30911	105376554	ENST00000531559.1	LINC02547	9438
286	chr2	25834049	25834360	312	Intron (ENST00000435504.8/55252, intron 3 of 12)	25768762	25830891	62130	55252	ENST00000497092.1	ASXL2	-3158
287	chr8	63018848	63019282	435	Promoter (<=1kb)	63015429	63017970	2542	8836	ENST00000522852.1	GGH	-878
288	chr1	6960948	6961190	243	Intron (ENST00000303635.11/23261, intron 3 of 22)	6874056	6887842	13787	23261	ENST00000467267.1	CAMTA1	86892
289	chr7	151768529	151768874	346	Intron (ENST00000287878.8/51422, intron 3 of 15)	151675548	151790632	115085	51422	ENST00000461529.1	PRKAG2	21758
290	chr15	53739240	53740063	824	Intron (ENST00000396328.5/256764, intron 1 of 19)	53517470	53733183	215714	256764	ENST00000559418.5	WDR72	-6057
291	chr11	63035423	63035790	368	Distal Intergenic	63014574	63015839	1266	9376	ENST00000544707.1	SLC22A8	-19584
292	chr11	62442431	62442831	401	Intron (ENST00000530124.5/79026, intron 2 of 2)	62419035	62423195	4161	7356	ENST00000278282.2	SCGB1A1	23396
293	chr17	717345	717654	310	Promoter (2-3kb)	531968	714856	182889	55275	ENST00000573028.5	VPS53	-2489
294	chr16	78598296	78598538	243	Intron (ENST00000566780.5/51741, intron 8 of 8)	78424871	78432752	7882	51741	ENST00000620008.1	WWOX	173425
295	chr3	115093564	115094194	631	Intron (ENST00000357258.8/26137, intron 1 of 9)	114389046	115100292	711247	26137	ENST00000492665.5	ZBTB20	6098
296	chr9	101459312	101459554	243	Distal Intergenic	101468439	101481502	13064	101928470	ENST00000424154.5	TMEM246-AS1	-8885
297	chr10	124021548	124021790	243	Intron (ENST00000435907.5/51363, intron 5 of 7)	124021082	124038619	17538	51363	ENST00000476765.1	CHST15	16829
298	chr2	127714827	127715444	618	Intron (ENST00000322313.8/55339, intron 17 of 21)	127701508	127705242	3735	84826	ENST00000310981.5	SFT2D3	13319
299	chr10	88957496	88957919	424	Intron (ENST00000371927.7/57559, intron 10 of 10)	88948242	88952773	4532	59	ENST00000482085.1	ACTA2	-4723
300	chr19	6063964	6069205	5242	Exon (ENST00000587759.1/ENST00000587759.1, exon 1 of 2)	6040186	6057283	17098	5990	ENST00000592281.5	RFX2	-6681
301	chr13	75400022	75402178	2157	Intron (ENST00000377625.6/9882, intron 1 of 18)	75283503	75367015	83513	9882	ENST00000648194.1	TBC1D4	-33007
302	chr22	46142835	46143174	340	Distal Intergenic	46150521	46198410	47890	5465	ENST00000440343.5	PPARA	-7347
303	chr5	176531825	176532609	785	Promoter (1-2kb)	176528939	176530645	1707	22838	ENST00000506378.1	RNF44	-1180
304	chr6	107050649	107051650	1002	3' UTR	107039992	107040907	916	51250	ENST00000489790.1	C6orf203	10657
305	chr16	81860792	81861034	243	Promoter (2-3kb)	81857945	81859269	1325	5336	ENST00000565020.1	PLCG2	2847
306	chr1	19232153	19233525	1373	Promoter (2-3kb)	19219569	19229395	9827	23065	ENST00000494770.6	EMC1	-2758
307	chr19	47874131	47874440	310	Intron (ENST00000222002.3/6822, intron 5 of 5)	47870466	47886397	15932	6822	ENST00000222002.3	SULT2A1	11957
308	chr10	96700524	96701021	498	Promoter (<=1kb)	96628398	96700878	72481	118788	ENST00000468783.1	PIK3AP1	0
309	chr8	61307479	61308823	1345	Intron (ENST00000519846.5/157807, intron 3 of 6)	61287980	61378375	90396	157807	ENST00000521189.1	CLVS1	19499
310	chr14	89480068	89480385	318	Intron (ENST00000345097.8/1112, intron 1 of 6)	89412197	89494051	81855	1112	ENST00000555034.5	FOXN3	13666
311	chr12	113075398	113075719	322	Intron (ENST00000257600.3/1840, intron 1 of 8)	113089866	113097997	8132	1840	ENST00000547974.5	DTX1	-14147
312	chr1	171318785	171319091	307	Intron (ENST00000497228.5/2329, intron 2 of 2)	171323106	171333147	10042	2329	ENST00000462992.1	FMO4	-4015
313	chr6	160383877	160384828	952	Intron (ENST00000275300.2/6581, intron 1 of 10)	160348268	160452581	104314	6581	ENST00000275300.2	SLC22A3	35609
314	chr17	66494909	66495151	243	Intron (ENST00000578063.5/5578, intron 2 of 9)	66398069	66416854	18786	101928001	ENST00000584715.5	PRKCA-AS1	-78055
315	chr3	44869901	44870467	567	Intron (ENST00000422209.1/56992, intron 6 of 6)	44874608	44889170	14563	7047	ENST00000490928.1	TGM4	-4141
316	chr6	106762826	106763068	243	Intron (ENST00000436659.5/100422737, intron 1 of 6)	106747085	106772293	25209	100422737	ENST00000415714.1	LINC02532	9225
317	chr17	67850412	67852238	1827	Intron (ENST00000544778.6/2186, intron 1 of 21)	67874920	67891962	17043	2186	ENST00000544491.2	BPTF	-22682
318	chr1	205722559	205723270	712	Promoter (2-3kb)	205718452	205719726	1275	64710	ENST00000464938.1	NUCKS1	-2833
319	chr6	43953313	43956156	2844	Distal Intergenic	44000580	44005150	4571	221416	ENST00000442114.6	C6orf223	-44424
320	chr6	141078044	141078462	419	Distal Intergenic	140683814	140683883	70	100616180	ENST00000583434.1	MIR4465	394230
321	chr13	101743905	101744437	533	Intron (ENST00000376131.8/2259, intron 3 of 4)	101868372	101875294	6923	2259	ENST00000468052.1	FGF14	130857
322	chr1	206525824	206526381	558	Intron (ENST00000579436.6/83593, intron 1 of 5)	206518388	206589448	71061	83593	ENST00000636182.1	RASSF5	7436
323	chr7	80346063	80346670	608	Intron (ENST00000627003.2/101927269, intron 2 of 2)	80369575	80674409	304835	948	ENST00000435819.5	CD36	-22905
324	chr8	74731284	74731586	303	Intron (ENST00000523442.5/441355, intron 4 of 6)	74705693	74705747	55	100302260	ENST00000636055.1	MIR2052	25591
325	chr10	129478234	129478476	243	Intron (ENST00000306010.7/4255, intron 1 of 4)	129467262	129537164	69903	4255	ENST00000482547.1	MGMT	10972
326	chr16	20766428	20767146	719	Promoter (1-2kb)	20764683	20777417	12735	6296	ENST00000561795.5	ACSM3	1745
327	chr6	37283559	37283801	243	Intron (ENST00000373491.3/55633, intron 5 of 12)	37218170	37258155	39986	221468	ENST00000357219.3	TMEM217	-25404
328	chr1	64887322	64887815	494	Intron (ENST00000342505.4/3716, intron 1 of 24)	64875985	64879063	3079	3716	ENST00000467764.1	JAK1	-8259
329	chr1	99683270	99683869	600	Promoter (<=1kb)	99683266	99694541	11276	54873	ENST00000496843.1	PALMD	4
330	chr17	13987485	13987727	243	Intron (ENST00000602743.1/100874058, intron 1 of 4)	14029292	14069458	40167	100874058	ENST00000449363.1	COX10-AS1	81731
331	chr22	45701035	45701338	304	Promoter (2-3kb)	45703973	45738839	34867	25814	ENST00000476998.5	ATXN10	-2635
332	chr14	93093685	93093989	305	Intron (ENST00000267615.10/3705, intron 2 of 10)	92958271	93115272	157002	3705	ENST00000555553.5	ITPK1	21283
333	chr6	37925970	37926567	598	Intron (ENST00000287218.8/60685, intron 1 of 5)	37929959	38142331	212373	60685	ENST00000373389.5	ZFAND3	-3392
334	chr1	161327935	161328177	243	Intron (ENST00000367975.6/6391, intron 2 of 5)	161323614	161362657	39044	6391	ENST00000470743.4	SDHC	4321
335	chr2	164664763	164665276	514	Intron (ENST00000495084.1/22837, intron 2 of 2)	164687643	164687777	135	100337591	ENST00000384142.1	SNORA70F	22501
336	chr11	100934628	100934870	243	Intron (ENST00000524892.7/143872, intron 6 of 22)	100913500	100948535	35036	143872	ENST00000531183.1	ARHGAP42	21128
337	chr7	12982741	12983043	303	Intron (ENST00000639998.1/ENST00000639998.1, intron 3 of 7)	12687635	12688914	1280	10124	ENST00000404894.1	ARL4A	295106
338	chr2	25598112	25599077	966	Promoter (<=1kb)	25576953	25599043	22091	1838	ENST00000474987.5	DTNB	0
339	chr11	22669379	22669621	243	Promoter (1-2kb)	22668108	22813001	144894	2620	ENST00000524701.5	GAS2	1271
340	chr3	41627699	41628463	765	Intron (ENST00000301831.8/54986, intron 30 of 36)	41800133	41854911	54779	54986	ENST00000460406.1	ULK4	226448
341	chr1	56932660	56932902	243	Promoter (<=1kb)	56931594	56933381	1788	732	ENST00000465658.1	C8B	479
342	chr12	54432794	54436909	4116	Exon (ENST00000550474.5/102724050, exon 3 of 4)	54419785	54437104	17320	102724050	ENST00000552053.1	LOC102724050	13009
343	chr6	142389278	142389589	312	Promoter (<=1kb)	142390312	142400776	10465	57211	ENST00000508295.2	ADGRG6	-723
344	chr10	117391120	117393296	2177	Distal Intergenic	117277274	117375467	98194	118987	ENST00000334464.6	PDZD8	-15653
345	chr2	218808513	218808816	304	Promoter (2-3kb)	218805914	218813025	7112	1593	ENST00000411688.1	CYP27A1	2599
346	chr7	27633009	27633564	556	Intron (ENST00000265395.6/11112, intron 2 of 7)	27531254	27647756	116503	11112	ENST00000425715.1	HIBADH	14192
347	chr1	204248400	204248768	369	Intron (ENST00000272203.7/22874, intron 12 of 22)	204198160	204214092	15933	127845	ENST00000308302.3	GOLT1A	-34308
348	chr1	47929887	47930256	370	Intron (ENST00000606738.2/388630, intron 2 of 6)	47775238	47994212	218975	388630	ENST00000435576.2	TRABD2B	63956
349	chr10	38350591	38350833	243	Intron (ENST00000640275.1/7587, intron 17 of 17)	38356380	38378505	22126	158160	ENST00000494540.5	HSD17B7P2	-5547
350	chr15	61058287	61058633	347	Intron (ENST00000335670.10/6095, intron 1 of 10)	60511294	61229133	717840	6095	ENST00000551975.5	RORA	170500
351	chr3	142576187	142576429	243	Promoter (2-3kb)	142560339	142578724	18386	545	ENST00000507148.1	ATR	2295
352	chr5	114453059	114453301	243	Intron (ENST00000512097.8/3781, intron 6 of 10)	114433578	114493442	59865	3781	ENST00000505491.1	KCNN2	19481
353	chr2	100840016	100841597	1582	Intron (ENST00000335681.9/4862, intron 1 of 20)	100821025	100948299	127275	4862	ENST00000427413.5	NPAS2	18991
354	chr1	219940228	219943135	2908	Intron (ENST00000484239.5/55532, intron 1 of 8)	219913506	219928651	15146	55532	ENST00000356609.2	SLC30A10	-11577
355	chr2	17557748	17559225	1478	Intron (ENST00000404666.6/7447, intron 1 of 3)	17541160	17657018	115859	7447	ENST00000406397.1	VSNL1	16588
356	chr6	160070332	160071299	968	Promoter (2-3kb)	160073416	160074057	642	3482	ENST00000487607.2	IGF2R	-2117
357	chr16	68950937	68951179	243	Intron (ENST00000261778.1/79613, intron 14 of 17)	68973040	69083515	110476	79613	ENST00000562000.5	TANGO6	-21861
358	chr18	31723105	31726792	3688	Exon (ENST00000583900.1/ENST00000583900.1, exon 1 of 1)	31759562	31760880	1319	147407	ENST00000269205.5	SLC25A52	34088
359	chrX	147885613	147885855	243	Distal Intergenic	147909431	147911817	2387	100126270	ENST00000594922.5	FMR1-AS1	25962
360	chr9	87633841	87634083	243	Intron (ENST00000358077.9/1612, intron 3 of 25)	87639438	87640412	975	1612	ENST00000463069.1	DAPK1	-5355
361	chr7	138103849	138104157	309	Intron (ENST00000468877.2/6718, intron 4 of 9)	138091843	138098310	6468	6718	ENST00000470851.1	AKR1D1	12006
362	chr20	21563395	21566210	2816	Distal Intergenic	21569976	21616325	46350	101929625	ENST00000623256.3	LINC01727	-3766
363	chr1	53177837	53178294	458	Distal Intergenic	53196429	53214197	17769	1376	ENST00000371486.3	CPT2	-18135
364	chr1	97498244	97498674	431	Intron (ENST00000370192.7/1806, intron 13 of 22)	97691207	97721654	30448	1806	ENST00000474241.1	DPYD	222980
365	chr1	205652754	205653061	308	Distal Intergenic	205657851	205662668	4818	85414	ENST00000460934.1	SLC45A3	9607
366	chr18	13431273	13441130	9858	Exon (ENST00000587905.5/753, exon 4 of 5)	13419421	13427480	8060	100288122	ENST00000588672.1	LDLRAD4-AS1	-3793
367	chr4	178414788	178415467	680	Distal Intergenic	177903384	177907936	4553	101928656	ENST00000514736.1	LINC01099	-506852
368	chr20	17540271	17540513	243	Intron (ENST00000377868.6/631, intron 1 of 7)	17493905	17531369	37465	631	ENST00000377873.7	BFSP1	-8902
369	chr3	52712255	52712953	699	Intron (ENST00000233027.9/6787, intron 15 of 15)	52706143	52708019	1877	28972	ENST00000474945.1	SPCS1	6112
370	chr2	111275405	111275647	243	Intron (ENST00000438897.1/ENST00000438897.1, intron 1 of 1)	111321013	111321086	74	100616341	ENST00000580915.2	MIR4435-2	45439
371	chr14	95296452	95296763	312	Promoter (<=1kb)	95213225	95296243	83019	79789	ENST00000555336.6	CLMN	-209
372	chr4	73511158	73512081	924	Promoter (<=1kb)	73510211	73534128	23918	728040	ENST00000504368.1	LINC02499	947
373	chr17	19749682	19749989	308	Promoter (<=1kb)	19743232	19748943	5712	218	ENST00000574162.5	ALDH3A1	-739
374	chr19	33879889	33880201	313	Distal Intergenic	33806924	33811828	4905	79047	ENST00000590385.2	KCTD15	72965
375	chr7	51122329	51123852	1524	Intron (ENST00000431948.5/23242, intron 4 of 11)	51016212	51190943	174732	23242	ENST00000431948.5	COBL	67091
376	chr3	123663577	123664007	431	Intron (ENST00000360772.7/4638, intron 24 of 33)	123646960	123649194	2235	4638	ENST00000513111.1	MYLK	-14383
377	chr19	10075429	10075671	243	Distal Intergenic	10086122	10088260	2139	55337	ENST00000592551.5	SHFL	-10451
378	chr22	30921819	30922590	772	Promoter (<=1kb)	30922308	30926550	4243	150291	ENST00000432624.2	MORC2-AS1	0
379	chr5	68587543	68587994	452	Distal Intergenic	68292683	68295743	3061	5295	ENST00000520550.1	PIK3R1	294860
380	chr12	110540537	110540779	243	Intron (ENST00000354300.4/160760, intron 3 of 5)	110536769	110546769	10001	160760	ENST00000548721.1	PPTC7	5990
381	chr7	99649074	99649377	304	Intron (ENST00000222982.8/1577, intron 12 of 12)	99652291	99660602	8312	1577	ENST00000488187.1	CYP3A5	11225
382	chr6	20133957	20134199	243	Intron (ENST00000324607.7/154141, intron 4 of 12)	20102145	20212399	110255	154141	ENST00000324607.7	MBOAT1	78200
383	chr6	11021150	11021470	321	Intron (ENST00000354666.3/54898, intron 1 of 7)	11043524	11078076	34553	100506409	ENST00000606532.5	ELOVL2-AS1	-22054
384	chr2	75500717	75501854	1138	Intron (ENST00000490746.5/84141, intron 3 of 3)	75493074	75517972	24899	84141	ENST00000410010.1	EVA1A	16118
385	chr18	67139244	67139486	243	Distal Intergenic	67081584	67081686	103	100847002	ENST00000578054.1	MIR5011	57660
386	chr15	53133041	53133405	365	Distal Intergenic	53116365	53129698	13334	105370822	ENST00000559915.1	LINC02490	16676
387	chr7	152905721	152905963	243	Distal Intergenic	152810742	152855371	44630	57180	ENST00000479402.1	ACTR3B	94979
388	chr11	93516343	93516585	243	Intron (ENST00000298966.6/56935, intron 1 of 2)	93479034	93523367	44334	56935	ENST00000529714.5	SMCO4	6782
389	chr9	89791765	89795347	3583	Distal Intergenic	89701651	89719670	18020	100129066	ENST00000444374.1	UNQ6494	90114
390	chr2	95684132	95689061	4930	Distal Intergenic	95592018	95599778	7761	129868	ENST00000272395.2	TRIM43	92114
391	chr8	17325480	17326333	854	Exon (ENST00000519122.5/9108, exon 4 of 4)	17304439	17311863	7425	9108	ENST00000519763.1	MTMR7	-13617
392	chr4	186162270	186162695	426	Promoter (<=1kb)	186163558	186167655	4098	25854	ENST00000510843.5	FAM149A	-863
393	chr5	33995451	33997480	2030	3' UTR	33988307	34008028	19722	23600	ENST00000382085.7	AMACR	10548
394	chr6	139825992	139826234	243	Intron (ENST00000644936.1/100132735, intron 1 of 2)	139839687	139860475	20789	100132735	ENST00000646293.1	FILNC1	-13453
395	chr6	38096905	38097847	943	Intron (ENST00000287218.8/60685, intron 4 of 5)	38088331	38152844	64514	60685	ENST00000440482.2	ZFAND3	8574
396	chr20	21569085	21569438	354	Promoter (<=1kb)	21569976	21616325	46350	101929625	ENST00000623256.3	LINC01727	-538
397	chr5	52889691	52889933	243	Exon (ENST00000509174.1/ENST00000509174.1, exon 1 of 1)	52901779	52952512	50734	3672	ENST00000504669.5	ITGA1	-11846
398	chr7	26665306	26665813	508	Downstream (1-2kb)	26638457	26647305	8849	285941	ENST00000614528.3	C7orf71	26849
399	chr13	40807350	40807778	429	Promoter (2-3kb)	40810766	40810861	96	693206	ENST00000384919.1	MIR621	-2988
400	chr15	52735724	52736656	933	Distal Intergenic	52611625	52709817	98193	56204	ENST00000561490.5	FAM214A	-25907
401	chr16	68954970	68955670	701	Intron (ENST00000261778.1/79613, intron 14 of 17)	68973040	69083515	110476	79613	ENST00000562000.5	TANGO6	-17370
402	chr8	97068564	97068806	243	Intron (ENST00000220763.9/10404, intron 7 of 7)	97055527	97092936	37410	10404	ENST00000529551.1	CPQ	13037
403	chr1	236807989	236808446	458	Intron (ENST00000535889.5/4548, intron 3 of 31)	236795615	236853088	57474	4548	ENST00000463959.1	MTR	12374
404	chrX	8913153	8915211	2059	Intron (ENST00000650341.1/ENST00000650341.1, intron 3 of 3)	8790795	8801383	10589	171482	ENST00000381003.7	FAM9A	-111770
405	chr7	150685266	150686583	1318	Promoter (<=1kb)	150685697	150687518	1822	26157	ENST00000487388.1	GIMAP2	0
406	chr15	41884769	41885201	433	Intron (ENST00000320955.7/51332, intron 7 of 67)	41892793	41895935	3143	105370792	ENST00000309874.2	LOC105370792	-7592
407	chr12	32390747	32391382	636	Distal Intergenic	32399529	32640533	241005	121512	ENST00000534526.6	FGD4	-8147
408	chr8	86318323	86318565	243	Promoter (2-3kb)	86217626	86321146	103521	157724	ENST00000520624.1	SLC7A13	2581
409	chr13	100091631	100092334	704	Promoter (2-3kb)	100089100	100530421	441322	5095	ENST00000647303.1	PCCA	2531
410	chr18	74355095	74355491	397	Intron (ENST00000579455.1/644041, intron 13 of 13)	74315813	74359187	43375	644041	ENST00000579455.1	C18orf63	39282
411	chr7	111107094	111110685	3592	Intron (ENST00000308478.9/54674, intron 2 of 2)	111091094	111097316	6223	54674	ENST00000464835.1	LRRN3	16000
412	chr1	135023	135265	243	Exon (ENST00000494149.2/ENST00000494149.2, exon 1 of 1)	139790	140339	550	729737	ENST00000493797.1	LOC729737	5074
413	chr15	88470742	88470984	243	Promoter (1-2kb)	88472507	88478267	5761	64963	ENST00000558548.5	MRPS11	-1523
414	chr19	11227143	11227445	303	Promoter (1-2kb)	11228840	11229332	493	57572	ENST00000590452.1	DOCK6	1887
415	chr10	133369964	133370639	676	Promoter (1-2kb)	133371556	133371663	108	100500911	ENST00000581277.1	MIR3944	1024
416	chr16	51756430	51756858	429	Distal Intergenic	51762519	51772646	10128	101927364	ENST00000569993.5	LINC01571	-5661
417	chr12	56883427	56886559	3133	Distal Intergenic	56923154	56934405	11252	121214	ENST00000293502.1	SDR9C7	47846
418	chr11	7547701	7547943	243	Intron (ENST00000526873.5/8495, intron 1 of 2)	7539178	7565698	26521	8495	ENST00000526046.1	PPFIBP2	8523
419	chr12	56782224	56782590	367	Promoter (2-3kb)	56784939	56787345	2407	8630	ENST00000556875.5	HSD17B6	-2349
420	chr16	78523741	78524053	313	Intron (ENST00000566780.5/51741, intron 8 of 8)	78424871	78432752	7882	51741	ENST00000620008.1	WWOX	98870
421	chr6	33904043	33910236	6194	Intron (ENST00000526556.1/ENST00000526556.1, intron 1 of 1)	33899135	33899200	66	102466816	ENST00000620587.1	MIR7159	4908
422	chr13	101618987	101619614	628	Intron (ENST00000618057.4/9358, intron 6 of 9)	101598146	101692944	94799	9358	ENST00000474233.1	ITGBL1	20841
423	chr2	222674999	222675241	243	Intron (ENST00000446656.3/116255, intron 1 of 5)	222671786	222709930	38145	116255	ENST00000446656.3	MOGAT1	3213
424	chr2	222684496	222684812	317	Intron (ENST00000446656.3/116255, intron 1 of 5)	222671786	222709930	38145	116255	ENST00000446656.3	MOGAT1	12710
425	chr11	86167210	86167452	243	Distal Intergenic	86244544	86278736	34193	8726	ENST00000263360.10	EED	-77092
426	chr9	136610532	136610895	364	Downstream (1-2kb)	136612024	136615637	3614	401561	ENST00000626304.2	LINC01451	4742
427	chr3	138344481	138344846	366	Promoter (2-3kb)	138347648	138405534	57887	22808	ENST00000614350.4	MRAS	-2802
428	chr16	68950319	68950561	243	Intron (ENST00000261778.1/79613, intron 14 of 17)	68973040	69083515	110476	79613	ENST00000562000.5	TANGO6	-22479
429	chr4	99602408	99603074	667	Intron (ENST00000511045.5/4547, intron 10 of 17)	99574824	99584193	9370	4547	ENST00000422897.6	MTTP	27584
430	chr17	70944341	70948936	4596	Distal Intergenic	71097775	71202177	104403	101928165	ENST00000569074.1	CASC17	253241
431	chr3	7647121	7647571	451	Intron (ENST00000467425.5/2917, intron 8 of 12)	7520138	7560333	40196	100873937	ENST00000427273.1	GRM7-AS1	-86788
432	chr19	6671850	6673635	1786	Promoter (1-2kb)	6664555	6670588	6034	8740	ENST00000599359.1	TNFSF14	-1262
433	chr9	73549191	73550439	1249	Distal Intergenic	73168098	73170393	2296	301	ENST00000491192.1	ANXA1	381093
434	chr2	120508076	120508385	310	Distal Intergenic	120464335	120466218	1884	84931	ENST00000622953.1	LINC01101	-41858
435	chr17	19574490	19574732	243	Promoter (1-2kb)	19572797	19578904	6108	55244	ENST00000581558.1	SLC47A1	1693
436	chr7	37433457	37434016	560	Intron (ENST00000310758.8/9844, intron 1 of 21)	37269454	37448856	179403	9844	ENST00000463390.1	ELMO1	14840
437	chr20	2767931	2768279	349	Distal Intergenic	2755088	2760101	5014	57593	ENST00000477287.1	EBF4	12843
438	chr9	71858429	71859612	1184	Downstream (2-3kb)	71750319	71816690	66372	23670	ENST00000545719.1	CEMIP2	-41739
439	chr14	99966807	99967183	377	Distal Intergenic	99971449	100144236	172788	51466	ENST00000402714.6	EVL	-4266
440	chr20	38354229	38362587	8359	Exon (ENST00000217407.2/3929, exon 4 of 15)	38346356	38377023	30668	3929	ENST00000217407.2	LBP	7873
441	chr1	67513211	67517157	3947	Distal Intergenic	67407810	67430415	22606	26135	ENST00000370994.8	SERBP1	-82796
442	chr3	170491566	170491881	316	Intron (ENST00000486975.1/5010, intron 2 of 3)	170467282	170755208	287927	101928583	ENST00000480067.1	SLC7A14-AS1	24284
443	chr10	89219759	89221193	1435	Intron (ENST00000336233.9/3988, intron 8 of 9)	89205629	89207314	1686	9023	ENST00000371852.3	CH25H	-12445
444	chr3	96334145	96334480	336	Distal Intergenic	96359964	96360039	76	102465864	ENST00000615894.1	MIR8060	-25484
445	chr3	41224588	41224830	243	Promoter (<=1kb)	41223992	41239947	15956	1499	ENST00000647021.1	CTNNB1	596
446	chr20	14478092	14478334	243	Intron (ENST00000217246.8/140733, intron 3 of 16)	14493479	14888668	395190	140733	ENST00000463861.5	MACROD2	-15145
447	chr22	46060858	46062143	1286	Intron (ENST00000381051.6/400931, intron 1 of 4)	46054915	46057210	2296	150381	ENST00000445441.1	PRR34-AS1	5943
448	chr20	20740536	20742158	1623	Distal Intergenic	20392767	20712488	319722	57186	ENST00000202677.11	RALGAPA2	-28048
449	chr6	35159279	35159521	243	Distal Intergenic	35118269	35148610	30342	6954	ENST00000418521.6	TCP11	-10669
450	chr9	122029317	122029634	318	Intron (ENST00000321582.9/158135, intron 3 of 8)	121988910	122092766	103857	158135	ENST00000487468.5	TTLL11	63132
451	chr12	56869351	56870029	679	Intron (ENST00000557452.1/ENST00000557452.1, intron 1 of 1)	56923154	56934405	11252	121214	ENST00000293502.1	SDR9C7	64376
452	chr1	15717617	15719316	1700	Exon (ENST00000375799.7/23207, exon 4 of 20)	15729845	15734115	4271	23207	ENST00000477849.1	PLEKHM2	-10529
453	chr5	57406780	57410424	3645	Intron (ENST00000506106.1/ENST00000506106.1, intron 1 of 3)	57480016	57482809	2794	345651	ENST00000423391.2	ACTBL2	72385
454	chr1	50783181	50784067	887	Intron (ENST00000396153.6/11124, intron 4 of 18)	50441276	50706051	264776	11124	ENST00000494400.5	FAF1	-77130
455	chr7	39341410	39341652	243	Intron (ENST00000403058.5/11281, intron 6 of 10)	39329003	39329134	132	109616963	ENST00000384220.1	SNORA20B	-12276
456	chr14	76267270	76268418	1149	Distal Intergenic	76310712	76498475	187764	2103	ENST00000512784.6	ESRRB	-42294
457	chr20	38973981	38974325	345	Intron (ENST00000373325.6/60625, intron 3 of 20)	38962360	39039721	77362	60625	ENST00000484417.5	DHX35	11621
458	chr10	113950281	113950583	303	Distal Intergenic	114044056	114046908	2853	153	ENST00000369295.3	ADRB1	-93473
459	chr2	233991769	233992822	1054	Intron (ENST00000324695.8/79054, intron 21 of 25)	233981808	234018438	36631	79054	ENST00000439148.1	TRPM8	9961
460	chr14	100534518	100535436	919	Downstream (1-2kb)	100525946	100529624	3679	79446	ENST00000555201.1	WDR25	8572
461	chr3	48421101	48421447	347	Promoter (1-2kb)	48418189	48419744	1556	5364	ENST00000484485.5	PLXNB1	-1357
462	chr10	49070580	49072037	1458	Intron (ENST00000332853.8/196740, intron 4 of 7)	49064151	49077291	13141	196740	ENST00000476018.2	VSTM4	5254
463	chr10	63744432	63745261	830	Intron (ENST00000444770.1/ENST00000444770.1, intron 2 of 2)	63598046	63620822	22777	221035	ENST00000634963.1	REEP3	146386
464	chr19	18055660	18055980	321	Distal Intergenic	18083112	18086930	3819	3594	ENST00000597416.1	IL12RB1	30950
465	chr22	43436061	43437122	1062	Intron (ENST00000417669.6/758, intron 3 of 6)	43416755	43425225	8471	758	ENST00000480239.1	MPPED1	19306
466	chr5	115194319	115194693	375	Distal Intergenic	115177123	115180546	3424	55521	ENST00000379617.2	TRIM36	-13773
467	chr1	7953741	7954883	1143	Promoter (<=1kb)	7954291	7985052	30762	11315	ENST00000493373.5	PARK7	0
468	chrX	134388333	134388718	386	Intron (ENST00000370803.7/84295, intron 3 of 10)	134373373	134415292	41920	84295	ENST00000370800.4	PHF6	14960
469	chr19	13021536	13027254	5719	Promoter (<=1kb)	13023991	13094758	70768	4784	ENST00000587760.5	NFIX	0
470	chr14	101842948	101843190	243	Intron (ENST00000422945.6/5527, intron 3 of 15)	101824838	101856885	32048	5527	ENST00000556373.1	PPP2R5C	18110
471	chr16	20385927	20386966	1040	Exon (ENST00000577173.1/ENST00000577173.1, exon 1 of 2)	20384645	20404556	19912	204474	ENST00000575561.1	PDILT	17590
472	chr3	108088643	108088885	243	Promoter (2-3kb)	108047081	108091014	43934	961	ENST00000361309.5	CD47	2129
473	chr2	23118609	23118911	303	Intron (ENST00000440785.1/ENST00000440785.1, intron 1 of 3)	23385217	23708606	323390	114818	ENST00000486442.5	KLHL29	-266306
474	chr12	24475680	24477409	1730	Intron (ENST00000646273.1/6660, intron 1 of 16)	24367935	24562382	194448	6660	ENST00000538905.1	SOX5	84973
475	chr18	49367207	49369367	2161	Promoter (<=1kb)	49282168	49368706	86539	54808	ENST00000584983.5	DYM	0
476	chr18	70047553	70049471	1919	3' UTR	70003031	70059943	56913	25914	ENST00000639487.1	RTTN	10472
477	chr7	66918004	66918439	436	Promoter (2-3kb)	66921225	66958551	37327	55069	ENST00000341567.8	TMEM248	-2786
478	chr4	48210032	48212949	2918	Intron (ENST00000381501.7/7006, intron 2 of 17)	48136804	48228659	91856	7006	ENST00000505452.5	TEC	15710
479	chr15	35446235	35446477	243	Intron (ENST00000256538.8/89978, intron 5 of 8)	35372107	35454760	82654	89978	ENST00000558266.5	DPH6	8283
480	chr1	92944577	92944880	304	Intron (ENST00000615519.4/388650, intron 1 of 4)	92842167	92961500	119334	388650	ENST00000370310.4	DIPK1A	16620
481	chr1	221302575	221303430	856	Distal Intergenic	221332639	221335920	3282	400804	ENST00000434398.1	C1orf140	32490
482	chr2	83478360	83478666	307	Distal Intergenic	83522814	83523502	689	101928031	ENST00000448431.1	LINC01809	-44148
483	chr7	70661933	70662962	1030	Intron (ENST00000644939.1/26053, intron 5 of 18)	70694058	70791126	97069	26053	ENST00000644359.1	AUTS2	-31096
484	chr16	74903463	74903705	243	Promoter (<=1kb)	74874426	74904020	29595	79726	ENST00000563797.5	WDR59	315
485	chr10	97590809	97591116	308	Promoter (1-2kb)	97589727	97590934	1208	414157	ENST00000370640.4	C10orf62	1082
486	chr16	23471326	23472019	694	Promoter (1-2kb)	23466591	23469582	2992	23062	ENST00000568922.1	GGA2	-1744
487	chr9	136890955	136891197	243	Promoter (1-2kb)	136889535	136900517	10983	7186	ENST00000414589.1	TRAF2	1420
488	chr3	148726754	148727182	429	Promoter (2-3kb)	148730100	148742247	12148	185	ENST00000474935.5	AGTR1	-2918
489	chr3	142877663	142877977	315	Intron (ENST00000295992.7/26577, intron 2 of 8)	142864110	142888745	24636	26577	ENST00000493733.1	PCOLCE2	10768
490	chr4	105137584	105137826	243	Exon (ENST00000504082.1/ENST00000504082.1, exon 2 of 2)	105145875	105242771	96897	54790	ENST00000305737.6	TET2	-8049
491	chr10	88847211	88849687	2477	Promoter (2-3kb)	88822132	88851818	29687	118932	ENST00000371930.4	ANKRD22	2131
492	chr20	4996855	4997467	613	Intron (ENST00000338244.5/9962, intron 1 of 16)	4852356	5001499	149144	9962	ENST00000338244.5	SLC23A2	4032
493	chr8	42328455	42329293	839	Promoter (2-3kb)	42325610	42331909	6300	3551	ENST00000522103.3	IKBKB	2845
494	chr5	94239921	94243077	3157	Intron (ENST00000513200.7/285600, intron 19 of 19)	93621081	94111699	490619	83989	ENST00000502503.1	FAM172A	-128222
495	chr16	68345735	68346151	417	Promoter (<=1kb)	68346121	68348433	2313	54496	ENST00000566687.1	PRMT7	0
496	chr2	8152627	8153652	1026	Intron (ENST00000456681.1/339788, intron 1 of 3)	8039934	8118324	78391	339789	ENST00000454043.1	LINC00299	-34303
497	chr1	178551621	178553139	1519	Distal Intergenic	178542796	178548889	6094	400798	ENST00000521244.1	C1orf220	8825
498	chr14	34976036	34976537	502	Intron (ENST00000556355.5/100506157, intron 1 of 5)	34981957	35029567	47611	6729	ENST00000556994.5	SRP54	-5420
499	chr12	128918796	128922245	3450	Intron (ENST00000441390.6/144423, intron 5 of 10)	128864136	128983739	119604	144423	ENST00000537468.1	GLT1D1	54660
500	chr18	23507012	23507533	522	Exon (ENST00000615148.4/29919, exon 3 of 18)	23503535	23509677	6143	29919	ENST00000592119.2	RMC1	3477
501	chr1	197672978	197673482	505	Intron (ENST00000620048.5/163486, intron 4 of 22)	197605482	197658350	52869	163486	ENST00000496935.1	DENND1B	-14628
502	chr7	66772404	66772646	243	Promoter (<=1kb)	66771900	66809284	37385	27342	ENST00000484547.7	RABGEF1	504
503	chrUn_GL000218v1	96590	97601	1012	Distal Intergenic	51867	54893	3027	389834	ENST00000612565.1	LOC389834	-41697
504	chr18	58430611	58431701	1091	Distal Intergenic	58451074	58451158	85	406906	ENST00000385044.3	MIR122	-19373
505	chr4	76013095	76013697	603	Promoter (<=1kb)	76012097	76082143	70047	419	ENST00000504914.5	ART3	998
506	chr9	40591847	40592960	1114	Distal Intergenic	40500683	40566779	66097	101929583	ENST00000617096.4	LOC101929583	91164
507	chr2	234085153	234086100	948	Distal Intergenic	234050837	234056278	5442	6694	ENST00000492481.1	SPP2	34316
508	chr2	202782452	202783562	1111	Intron (ENST00000617388.4/130026, intron 12 of 12)	202814757	202820021	5265	130026	ENST00000494560.1	ICA1L	36459
509	chr22	37105364	37105606	243	Promoter (1-2kb)	37083940	37103656	19717	164656	ENST00000442782.6	TMPRSS6	-1708
510	chrX	45524475	45525855	1381	Exon (ENST00000609127.1/101927528, exon 4 of 4)	45510484	45630202	119719	101927528	ENST00000422047.1	LINC01204	13991
511	chr1	19073088	19078075	4988	Promoter (<=1kb)	19074567	19077827	3261	23352	ENST00000486515.1	UBR4	0
512	chr8	10043316	10044018	703	Distal Intergenic	10054268	10428891	374624	4482	ENST00000317173.8	MSRA	-10250
513	chr7	121080730	121081085	356	Intron (ENST00000310396.9/79974, intron 5 of 22)	121076578	121136054	59477	79974	ENST00000443817.1	CPED1	4152
514	chr6	160720518	160720891	374	Intron (ENST00000308192.13/5340, intron 9 of 18)	160730740	160731833	1094	5340	ENST00000493435.1	PLG	-9849
515	chr6	40969277	40969519	243	Distal Intergenic	41028373	41032987	4615	222643	ENST00000470102.1	UNC5CL	63468
516	chr6	21144517	21144869	353	Intron (ENST00000274695.8/54901, intron 13 of 15)	21200812	21231441	30630	54901	ENST00000476517.1	CDKAL1	-55943
517	chr5	176519816	176520125	310	Distal Intergenic	176529078	176529808	731	22838	ENST00000515051.1	RNF44	9683
518	chr9	127288191	127288519	329	Intron (ENST00000439286.5/84253, intron 3 of 10)	127265002	127339750	74749	84253	ENST00000464616.6	GARNL3	23189
519	chr11	41377950	41379799	1850	Intron (ENST00000528697.5/57689, intron 1 of 6)	40114293	41459585	1345293	57689	ENST00000528697.5	LRRC4C	79786
520	chr11	73135256	73135498	243	Intron (ENST00000311172.11/9873, intron 1 of 18)	72842954	73140061	297108	9873	ENST00000409853.5	FCHSD2	4563
521	chr8	133317849	133318151	303	Distal Intergenic	133256785	133302022	45238	10397	ENST00000520230.5	NDRG1	-15827
522	chr1	26880794	26881097	304	Intron (ENST00000374135.8/54707, intron 4 of 4)	26879501	26886341	6841	54707	ENST00000477418.2	GPN2	5244
523	chrY	13552063	13552519	457	Distal Intergenic	13248379	13480673	232295	7404	ENST00000331397.8	UTY	-71390
524	chr19	33347198	33351532	4335	Distal Intergenic	33373330	33382686	9357	1054	ENST00000284000.8	CEBPG	-21798
525	chr7	15509283	15509587	305	Intron (ENST00000342526.7/392636, intron 3 of 12)	15200318	15562015	361698	392636	ENST00000342526.7	AGMO	52428
526	chr20	34552854	34555067	2214	Intron (ENST00000374837.7/84557, intron 2 of 4)	34558108	34560345	2238	84557	ENST00000360668.7	MAP1LC3A	-3041
527	chr14	24292222	24293774	1553	Promoter (<=1kb)	24290598	24292643	2046	115817	ENST00000559088.5	DHRS1	0
528	chr12	67430043	67432920	2878	Distal Intergenic	67440998	67442559	1562	102724433	ENST00000543387.1	LINC02420	9639
529	chr7	117047894	117049387	1494	Intron (ENST00000393446.6/7982, intron 1 of 13)	117072072	117074724	2653	93654	ENST00000446784.5	ST7-AS2	25337
530	chr9	109602300	109603692	1393	Distal Intergenic	109640788	109946703	305916	114299	ENST00000374531.6	PALM2	-37096
531	chr8	104320843	104325116	4274	Distal Intergenic	104339087	104348674	9588	81501	ENST00000519562.1	DCSTAMP	-13971
532	chr1	162363823	162368833	5011	Promoter (<=1kb)	162366908	162383377	16470	400793	ENST00000420220.1	C1orf226	0
533	chr22	25161620	25161862	243	Intron (ENST00000406486.8/85379, intron 7 of 13)	25199850	25207363	7514	1417	ENST00000215855.6	CRYBB3	-37988
534	chr10	50893803	50894371	569	Distal Intergenic	50836074	50885675	49602	29974	ENST00000414883.1	A1CF	-8128
535	chr16	68231629	68231871	243	Promoter (<=1kb)	68231967	68232506	540	80004	ENST00000565213.2	ESRP2	635
536	chr9	134063121	134063363	243	Intron (ENST00000303407.11/8019, intron 1 of 11)	134030305	134068017	37713	8019	ENST00000303407.11	BRD3	4654
537	chr13	50393124	50393366	243	Promoter (2-3kb)	50390198	50723236	333039	10301	ENST00000470726.6	DLEU1	2926
538	chr2	200577834	200578901	1068	Intron (ENST00000357799.8/151246, intron 8 of 8)	200585868	200671495	85628	316	ENST00000374700.6	AOX1	-6967
539	chr1	119547127	119547369	243	Distal Intergenic	119507318	119514800	7483	3283	ENST00000528909.1	HSD3B1	39809
540	chr2	122701371	122701613	243	Distal Intergenic	123066151	123073481	7331	107985818	ENST00000432894.1	LINC01826	371868
541	chr16	66970369	66971207	839	Promoter (2-3kb)	66967475	66975148	7674	23491	ENST00000543856.1	CES3	2894
542	chr6	131854005	131854247	243	Intron (ENST00000360971.6/5167, intron 5 of 24)	131849999	131877867	27869	5167	ENST00000650437.1	ENPP1	4006
543	chr7	100730396	100730638	243	Promoter (2-3kb)	100733626	100797797	64172	7455	ENST00000538115.5	ZAN	-2988
544	chr12	53161169	53162551	1383	3' UTR	53160277	53170376	10100	51380	ENST00000490589.5	CSAD	7825
545	chr21	43045840	43046869	1030	Distal Intergenic	43053755	43058941	5187	102724560	ENST00000451248.5	CBSL	12072
546	chr14	73555917	73558252	2336	Promoter (<=1kb)	73478486	73558921	80436	399671	ENST00000553558.5	HEATR4	669
547	chr4	48040656	48044437	3782	Distal Intergenic	48025127	48038860	13734	152519	ENST00000511123.1	NIPAL1	15529
548	chr14	73477265	73477507	243	Downstream (<1kb)	73478489	73480922	2434	399671	ENST00000566478.1	HEATR4	3415
549	chr19	5865245	5865487	243	Downstream (<1kb)	5865826	5870540	4715	2527	ENST00000588525.1	FUT5	5053
550	chrX	19955865	19956107	243	Intron (ENST00000379687.7/256643, intron 3 of 10)	19928981	19965142	36162	256643	ENST00000340625.3	BCLAF3	9035
551	chr1	162359051	162363492	4442	Promoter (<=1kb)	162360537	162367221	6685	9722	ENST00000464284.1	NOS1AP	0
552	chr12	113081398	113081768	371	Intron (ENST00000257600.3/1840, intron 2 of 8)	113089866	113097997	8132	1840	ENST00000547974.5	DTX1	-8098
553	chr13	42534436	42535204	769	Distal Intergenic	42562736	42607174	44439	8600	ENST00000358545.6	TNFSF11	-27532
554	chr4	32473932	32474174	243	Distal Intergenic	32351038	32353220	2183	101927363	ENST00000515181.1	LINC02353	122894
555	chr12	50662648	50663274	627	Intron (ENST00000549620.5/57609, intron 4 of 7)	50640805	50680282	39478	57609	ENST00000546719.1	DIP2B	21843
556	chr2	16496010	16497920	1911	Distal Intergenic	16560657	16561482	826	81553	ENST00000469507.1	FAM49A	63562
557	chr11	58734574	58736061	1488	Promoter (2-3kb)	58710083	58731974	21892	10249	ENST00000278400.3	GLYAT	-2600
558	chr1	215606938	215607918	981	Intron (ENST00000259154.8/51133, intron 13 of 17)	215602170	215618951	16782	51133	ENST00000452413.1	KCTD3	4768
559	chr13	77310207	77311598	1392	Intron (ENST00000544440.6/23077, intron 1 of 82)	77044655	77326679	282025	23077	ENST00000544440.6	MYCBP2	15081
560	chr16	27189020	27190274	1255	Distal Intergenic	27203495	27221768	18274	79831	ENST00000286096.8	KDM8	-13221
561	chr11	7589912	7595346	5435	Promoter (1-2kb)	7597186	7653351	56166	8495	ENST00000528883.5	PPFIBP2	-1840
562	chr12	107670632	107671018	387	Distal Intergenic	107685732	107713167	27436	11137	ENST00000412830.7	PWP1	-14714
563	chr1	100656239	100656481	243	Distal Intergenic	100627049	100640613	13565	100128787	ENST00000416343.2	LINC01349	-15626
564	chr22	42359109	42361346	2238	Distal Intergenic	42364400	42369168	4769	102723775	ENST00000432473.1	LINC01315	7822
565	chr14	73584794	73585322	529	Distal Intergenic	73591706	73596496	4791	122970	ENST00000326303.4	ACOT4	-6384
566	chr8	66669438	66671950	2513	Promoter (1-2kb)	66667652	66678295	10644	56260	ENST00000521889.5	C8orf44	1786
567	chr5	158654987	158655229	243	Distal Intergenic	158698641	158708009	9369	1879	ENST00000518323.1	EBF1	52780
568	chr3	33002871	33003242	372	Intron (ENST00000307363.9/2720, intron 15 of 15)	33021254	33024425	3172	2720	ENST00000473477.1	GLB1	21183
569	chr6	156900893	156901135	243	Promoter (<=1kb)	156901376	157186620	285245	57492	ENST00000319584.11	ARID1B	-241
570	chr6	160118377	160144428	26052	Promoter (<=1kb)	160121789	160158718	36930	6580	ENST00000366963.8	SLC22A1	0
571	chr14	35326252	35326586	335	Distal Intergenic	35310833	35317472	6640	5687	ENST00000556221.1	PSMA6	15419
572	chr1	224166836	224170858	4023	Distal Intergenic	224175756	224192353	16598	8560	ENST00000415210.5	DEGS1	-4898
573	chr7	39520062	39520486	425	Distal Intergenic	39566376	39572881	6506	57002	ENST00000223273.6	YAE1	-45890
574	chr17	5313037	5314789	1753	Intron (ENST00000537505.5/9135, intron 2 of 17)	5332055	5336689	4635	9135	ENST00000570487.1	RABEP1	-17266
575	chr15	37768994	37769236	243	Distal Intergenic	37921939	37936918	14980	145942	ENST00000560841.5	TMCO5A	-152703
576	chr2	187847972	187848719	748	Intron (ENST00000434418.2/104355152, intron 3 of 3)	187496881	187565760	68880	7035	ENST00000421427.5	TFPI	-282212
577	chr1	156069270	156072001	2732	Promoter (1-2kb)	156068212	156070365	2154	57111	ENST00000497968.1	RAB25	1058
578	chr14	75547068	75551578	4511	Distal Intergenic	75522560	75546993	24434	10538	ENST00000555504.1	BATF	24508
579	chr8	86253834	86258863	5030	Intron (ENST00000520624.1/157724, intron 2 of 3)	86214052	86230381	16330	157724	ENST00000297524.7	SLC7A13	-23453
580	chr4	39694909	39695376	468	Promoter (2-3kb)	39698044	39782792	84749	3093	ENST00000261427.9	UBE2K	-2668
581	chr1	13312737	13313465	729	Promoter (2-3kb)	13315581	13322598	7018	653619	ENST00000376152.2	PRAMEF15	-2116
582	chr8	136967837	136968079	243	Intron (ENST00000649576.1/107986980, intron 6 of 8)	136797273	136984935	187663	107986980	ENST00000521034.1	LINC02055	170564
583	chr22	32407297	32407991	695	Promoter (<=1kb)	32398042	32407526	9485	51493	ENST00000476619.5	RTCB	0
584	chr11	49205482	49205832	351	Promoter (2-3kb)	49200301	49208160	7860	2346	ENST00000529117.1	FOLH1	2328
585	chr14	72821925	72822167	243	Intron (ENST00000556509.5/8110, intron 1 of 10)	72771744	72836483	64740	8110	ENST00000556902.5	DPF3	14316
586	chr3	129208101	129209317	1217	Distal Intergenic	129171168	129183922	12755	7555	ENST00000512338.1	CNBP	-24179
587	chr14	52846413	52846655	243	Intron (ENST00000649005.1/ENST00000649005.1, intron 3 of 5)	52857272	52861303	4032	10979	ENST00000555546.5	FERMT2	14648
588	chr13	99910714	99911086	373	Distal Intergenic	99871018	99891612	20595	171425	ENST00000425186.2	CLYBL	39696
589	chr3	72317400	72317642	243	Distal Intergenic	72061061	72279503	218443	285286	ENST00000626474.2	LINC00877	-37897
590	chr1	56803459	56803771	313	Intron (ENST00000343433.6/199920, intron 1 of 19)	56718804	56819371	100568	199920	ENST00000343433.6	FYB2	15600
591	chr2	210503145	210504054	910	Intron (ENST00000417946.5/1373, intron 1 of 4)	210477709	210679107	201399	1373	ENST00000430249.6	CPS1	25436
592	chr19	5867625	5868505	881	Promoter (2-3kb)	5865826	5870540	4715	2527	ENST00000588525.1	FUT5	2035
593	chr19	15447631	15448392	762	Promoter (1-2kb)	15449548	15449608	61	100302127	ENST00000600745.1	MIR1470	-1156
594	chr1	179000678	179000982	305	Distal Intergenic	179025804	179050316	24513	9917	ENST00000440702.5	FAM20B	-24822
595	chr11	35321121	35321363	243	Intron (ENST00000278379.8/6506, intron 1 of 10)	35265443	35317383	51941	6506	ENST00000646167.1	SLC1A2	-3738
596	chr3	142960901	142965611	4711	Promoter (<=1kb)	142962383	142964810	2428	101927832	ENST00000625937.2	PAQR9-AS1	0
597	chr7	116857760	116858087	328	Intron (ENST00000464223.5/830, intron 1 of 3)	116862473	116922049	59577	830	ENST00000361183.7	CAPZA2	-4386
598	chr2	186209812	186210128	317	Distal Intergenic	186032891	186083233	50343	101927217	ENST00000456653.6	LINC01473	-126579
599	chr6	162012493	162012869	377	Intron (ENST00000366898.5/5071, intron 5 of 11)	161548754	161569420	20667	5071	ENST00000612485.1	PRKN	-443073
600	chr12	53551860	53552102	243	Intron (ENST00000648881.1/ENST00000648881.1, intron 3 of 6)	53543091	53543951	861	11016	ENST00000550373.2	ATF7	-7909
601	chr8	10325658	10326649	992	Exon (ENST00000517594.1/ENST00000517594.1, exon 1 of 2)	10301535	10353963	52429	4482	ENST00000521686.1	MSRA	24123
602	chr12	76491438	76491853	416	Intron (ENST00000393249.6/114882, intron 4 of 25)	76397856	76486108	88253	114882	ENST00000548341.5	OSBPL8	-5330
603	chr1	40535147	40536523	1377	Intron (ENST00000372699.7/127396, intron 2 of 4)	40531722	40547785	16064	127396	ENST00000493756.1	ZNF684	3425
604	chr6	128103842	128106049	2208	Intron (ENST00000368226.8/5796, intron 7 of 29)	128062066	128067677	5612	5796	ENST00000434424.5	PTPRK	-36165
605	chr7	27801546	27806396	4851	Exon (ENST00000409980.5/8887, exon 14 of 18)	27793138	27829022	35885	8887	ENST00000457186.2	TAX1BP1	8408
606	chr11	47119398	47119640	243	Intron (ENST00000528488.5/79096, intron 3 of 9)	47137696	47155952	18257	79096	ENST00000529980.5	C11orf49	-18056
607	chr5	115809634	115817920	8287	Promoter (<=1kb)	115804733	115816954	12222	1036	ENST00000250535.4	CDO1	0
608	chr6	166301534	166303065	1532	Downstream (2-3kb)	166305300	166308383	3084	285800	ENST00000322583.4	PRR18	5318
609	chr11	13422034	13422697	664	Intron (ENST00000278174.9/84280, intron 2 of 8)	13405549	13440208	34660	84280	ENST00000525661.5	BTBD10	17511
610	chr3	53151808	53152124	317	Distal Intergenic	53156009	53179694	23686	5580	ENST00000478843.5	PRKCD	-3885
611	chr1	241524412	241525959	1548	Distal Intergenic	241497603	241519761	22159	2271	ENST00000366560.3	FH	-4651
612	chr9	95136247	95138378	2132	Promoter (<=1kb)	95109597	95135543	25947	2176	ENST00000477942.5	FANCC	-704
613	chr6	84170744	84173520	2777	Exon (ENST00000461137.5/22832, exon 8 of 18)	84124955	84155594	30640	22832	ENST00000487999.1	CEP162	-15150
614	chr18	13441944	13445258	3315	Intron (ENST00000587905.5/753, intron 4 of 4)	13419421	13427480	8060	100288122	ENST00000588672.1	LDLRAD4-AS1	-14464
615	chr17	31572263	31574221	1959	Promoter (1-2kb)	31575269	31575358	90	100616449	ENST00000581700.1	MIR4725	-1048
616	chr8	135487232	135487773	542	Intron (ENST00000355849.9/10656, intron 1 of 8)	135458707	135557539	98833	10656	ENST00000517394.5	KHDRBS3	28525
617	chr9	99815580	99815882	303	Intron (ENST00000427039.1/101928438, intron 1 of 6)	99585786	99819889	234104	101928438	ENST00000427039.1	LOC101928438	4007
618	chr13	80461350	80478341	16992	Distal Intergenic	80335976	80340951	4976	10253	ENST00000377104.3	SPRY2	-120399
619	chr17	32101485	32102068	584	Distal Intergenic	32142454	32225770	83317	55288	ENST00000333942.10	RHOT1	-40386
620	chr16	67749024	67749525	502	Intron (ENST00000317506.7/57610, intron 3 of 13)	67674533	67719421	44889	81577	ENST00000268797.11	GFOD2	-29603
621	chr3	45582028	45582270	243	Intron (ENST00000465039.5/8994, intron 1 of 7)	45594324	45673898	79575	8994	ENST00000440097.5	LIMD1	-12054
622	chr22	30390616	30390858	243	Intron (ENST00000431544.2/200312, intron 1 of 4)	30378817	30387388	8572	200312	ENST00000382363.7	RNF215	-3228
623	chr5	132361327	132361740	414	Promoter (1-2kb)	132332189	132360136	27948	553103	ENST00000616965.1	MIR3936HG	-1191
624	chr22	19950348	19954579	4232	Promoter (<=1kb)	19950942	19968589	17648	1312	ENST00000412786.5	COMT	0
625	chr17	81322956	81325125	2170	Exon (ENST00000576919.1/284186, exon 2 of 2)	81313753	81330415	16663	284186	ENST00000574093.1	TMEM105	5290
626	chr7	151739041	151741378	2338	Promoter (2-3kb)	151556161	151736314	180154	51422	ENST00000492843.5	PRKAG2	-2727
627	chr1	152878951	152879688	738	Promoter (<=1kb)	152878317	152885047	6731	4184	ENST00000368765.3	SMCP	634
628	chr14	104085123	104088193	3071	Promoter (<=1kb)	104085679	104115581	29903	374569	ENST00000551177.5	ASPG	0
629	chr3	81816162	81817600	1439	Distal Intergenic	81489699	81762161	272463	2632	ENST00000429644.6	GBE1	-54001
630	chr1	78220377	78230536	10160	Promoter (<=1kb)	78229599	78293890	64292	149047	ENST00000436742.5	MGC27382	0
631	chr9	127209602	127209985	384	Promoter (<=1kb)	127210503	127212967	2465	9649	ENST00000467325.2	RALGPS1	-518
632	chrX	16971452	16972739	1288	Intron (ENST00000357277.7/9185, intron 1 of 17)	16947070	17022371	75302	9185	ENST00000481792.1	REPS2	24382
633	chr16	20767519	20768006	488	Promoter (2-3kb)	20770160	20797156	26997	6296	ENST00000562251.5	ACSM3	-2154
634	chr5	88130051	88130293	243	Distal Intergenic	88196350	88198451	2102	153396	ENST00000515293.1	TMEM161B	68158
635	chr11	59003596	59004058	463	Intron (ENST00000534063.1/92292, intron 1 of 1)	58958217	58979285	21069	283194	ENST00000525714.1	LOC283194	-24311
636	chr12	101734457	101735021	565	Promoter (2-3kb)	101728648	101731666	3019	50511	ENST00000478238.1	SYCP3	-2791
637	chr2	102132831	102133073	243	Intron (ENST00000452403.5/3554, intron 2 of 4)	102141771	102165136	23366	3554	ENST00000450319.5	IL1R1	-8698
638	chr2	166227323	166232695	5373	Exon (ENST00000409672.5/6335, exon 22 of 27)	166198299	166205239	6941	6335	ENST00000646694.1	SCN9A	-22084
639	chr4	81452266	81452508	243	3' UTR	81452029	81457602	5574	153020	ENST00000514889.1	RASGEF1B	5094
640	chr22	19324774	19326283	1510	Distal Intergenic	19254034	19291716	37683	8218	ENST00000449918.1	CLTCL1	-33058
641	chr19	5868838	5869353	516	Promoter (1-2kb)	5865826	5870540	4715	2527	ENST00000588525.1	FUT5	1187
642	chr10	50543913	50544155	243	Intron (ENST00000429490.5/259230, intron 2 of 9)	50459941	50466932	6992	259230	ENST00000498514.5	SGMS1	-76981
643	chr18	11028248	11030003	1756	Intron (ENST00000302079.10/63895, intron 2 of 50)	10670241	11148588	478348	63895	ENST00000302079.10	PIEZO2	118585
644	chr1	171599664	171602072	2409	5' UTR	171587662	171591313	3652	23215	ENST00000492811.1	PRRC2C	12002
645	chr15	53738685	53738989	305	Intron (ENST00000396328.5/256764, intron 1 of 19)	53517470	53733183	215714	256764	ENST00000559418.5	WDR72	-5502
646	chr16	2121934	2122247	314	Intron (ENST00000262304.8/5310, intron 1 of 45)	2116592	2118124	1533	5310	ENST00000570150.1	PKD1	-3810
647	chr15	84894847	84895267	421	Exon (ENST00000338602.6/9154, exon 6 of 7)	84884678	84945796	61119	9154	ENST00000286749.3	SLC28A1	10169
648	chr11	126363199	126364301	1103	Intron (ENST00000534733.6/6484, intron 2 of 4)	126355974	126414575	58602	6484	ENST00000534083.5	ST3GAL4	7225
649	chr3	135212398	135214635	2238	Intron (ENST00000398015.7/2047, intron 12 of 15)	135132792	135154402	21611	2047	ENST00000488992.1	EPHB1	79606
650	chr12	109184747	109185063	317	Intron (ENST00000338432.11/32, intron 11 of 52)	109191478	109191918	441	32	ENST00000544651.1	ACACB	-6415
651	chr4	107912174	107912681	508	3' UTR	107894248	107895687	1440	166929	ENST00000503385.1	SGMS2	17926
652	chr2	75578977	75579645	669	Distal Intergenic	75492318	75569722	77405	84141	ENST00000233712.5	EVA1A	-9255
653	chr10	132023403	132024026	624	Distal Intergenic	131966455	131982013	15559	664	ENST00000368636.8	BNIP3	-41390
654	chr9	101605936	101606694	759	Intron (ENST00000361820.3/116443, intron 6 of 8)	101600849	101613522	12674	116443	ENST00000479772.1	GRIN3A	6828
655	chr12	58886058	58886300	243	Promoter (<=1kb)	58885880	58887035	1156	121227	ENST00000550304.1	LRIG3	735
656	chr7	105255184	105255910	727	Intron (ENST00000393651.7/6733, intron 2 of 15)	105116377	105269015	152639	6733	ENST00000357311.7	SRPK2	13105
657	chr7	149752706	149753261	556	Distal Intergenic	149764182	149773219	9038	168544	ENST00000484747.5	ZNF467	19958
658	chr5	110879965	110881522	1558	Distal Intergenic	110755120	110762213	7094	91137	ENST00000509432.1	SLC25A46	124845
659	chr5	56213561	56214737	1177	Intron (ENST00000341048.8/79722, intron 2 of 11)	56099773	56232926	133154	79722	ENST00000504958.6	ANKRD55	18189
660	chr4	99677522	99677889	368	Distal Intergenic	99636529	99654648	18120	285556	ENST00000511828.1	C4orf54	-22874
661	chr4	184413072	184413314	243	Intron (ENST00000393593.7/3660, intron 5 of 8)	184389022	184418590	29569	3660	ENST00000505067.5	IRF2	5276
662	chr7	87418112	87418441	330	Intron (ENST00000649586.1/5244, intron 20 of 27)	87405920	87408234	2315	5244	ENST00000467079.1	ABCB4	-9878
663	chr9	136527686	136528932	1247	Intron (ENST00000277541.7/4851, intron 2 of 33)	136522628	136523898	1271	4851	ENST00000491649.1	NOTCH1	-3788
664	chr16	10402301	10402543	243	Intron (ENST00000564797.5/80063, intron 3 of 4)	10386061	10482118	96058	80063	ENST00000535850.5	ATF7IP2	16240
665	chr11	121483340	121484615	1276	Intron (ENST00000260197.11/6653, intron 3 of 47)	121452380	121547024	94645	6653	ENST00000532451.1	SORL1	30960
666	chr3	126189118	126190445	1328	Intron (ENST00000500232.2/100862662, intron 1 of 1)	126158598	126197941	39344	10840	ENST00000511283.2	ALDH1L1	7496
667	chr11	22083332	22084733	1402	Intron (ENST00000648804.1/203859, intron 5 of 23)	22193176	22283357	90182	203859	ENST00000324559.8	ANO5	-108443
668	chr10	35183989	35184231	243	Intron (ENST00000474362.5/1390, intron 1 of 2)	35178889	35211803	32915	1390	ENST00000463960.5	CREM	5100
669	chr1	215627015	215627599	585	Intron (ENST00000307340.7/7399, intron 71 of 71)	215618705	215620203	1499	51133	ENST00000465650.1	KCTD3	8310
670	chr1	109771533	109773757	2225	Intron (ENST00000429410.2/2949, intron 1 of 1)	109750081	109764027	13947	79574	ENST00000369805.7	EPS8L3	-7506
671	chr12	2162565	2162807	243	Intron (ENST00000335762.9/775, intron 3 of 47)	2220537	2223479	2943	100874234	ENST00000544415.1	CACNA1C-AS4	60672
672	chr8	100663864	100664428	565	Promoter (<=1kb)	100612039	100663415	51377	169166	ENST00000520352.5	SNX31	-449
673	chr3	52838107	52838349	243	Promoter (1-2kb)	52833121	52840262	7142	389125	ENST00000495552.1	MUSTN1	1913
674	chr2	182048326	182051590	3265	Exon (ENST00000410486.1/ENST00000410486.1, exon 1 of 1)	182061463	182064123	2661	151242	ENST00000461410.1	PPP1R1C	-9873
675	chr8	131866093	131866463	371	Distal Intergenic	131904088	132013642	109555	23167	ENST00000254624.9	EFR3A	-37625
676	chr16	8699652	8699894	243	Intron (ENST00000268251.12/18, intron 1 of 15)	8712837	8746025	33189	18	ENST00000568847.5	ABAT	-12943
677	chr12	104055687	104056553	867	Intron (ENST00000548660.5/83468, intron 1 of 10)	103999418	104050137	50720	83468	ENST00000546851.1	GLT8D2	-5550
678	chr22	28974601	28975295	695	Intron (ENST00000544604.6/84133, intron 1 of 8)	28987052	29053965	66914	84133	ENST00000406323.3	ZNRF3	-11757
679	chr7	134341738	134341980	243	Distal Intergenic	134289332	134317051	27720	84912	ENST00000378509.8	SLC35B4	-24687
680	chr22	32420242	32423258	3017	Intron (ENST00000300399.7/254240, intron 11 of 14)	32387582	32412255	24674	51493	ENST00000216038.5	RTCB	-7987
681	chr14	68444934	68445700	767	Intron (ENST00000479335.5/5890, intron 10 of 11)	68472033	68478101	6069	5890	ENST00000555782.1	RAD51B	-26333
682	chr3	148702516	148702758	243	Intron (ENST00000497524.5/185, intron 1 of 1)	148698175	148731497	33323	185	ENST00000475166.5	AGTR1	4341
683	chr5	33223416	33223827	412	Intron (ENST00000510327.1/ENST00000510327.1, intron 2 of 2)	33229735	33255553	25819	105374716	ENST00000503577.1	LINC02160	-5908
684	chr9	113913014	113913256	243	Intron (ENST00000374126.9/114991, intron 1 of 14)	113876382	114030882	154501	114991	ENST00000481558.1	ZNF618	36632
685	chr10	50648278	50649384	1107	Distal Intergenic	50460673	50625163	164491	259230	ENST00000608287.1	SGMS1	-23115
686	chr4	87208965	87210341	1377	Intron (ENST00000273963.9/57563, intron 1 of 9)	87162522	87220268	57747	57563	ENST00000512111.1	KLHL8	9927
687	chr15	28709945	28710525	581	Promoter (1-2kb)	28701954	28712323	10370	653720	ENST00000563027.1	GOLGA8M	1798
688	chr22	21718852	21719739	888	Intron (ENST00000339468.7/29799, intron 1 of 4)	21704082	21735755	31674	29799	ENST00000403503.1	YPEL1	16016
689	chr10	88241602	88244966	3365	Distal Intergenic	87952199	87961309	9111	5728	ENST00000472832.2	PTEN	289403
690	chrX	56762963	56764511	1549	Intron (ENST00000637096.1/550643, intron 2 of 3)	56737242	56737577	336	442454	ENST00000421129.1	UQCRBP1	-25386
691	chr7	99185884	99186126	243	Intron (ENST00000327442.6/402569, intron 6 of 9)	99173574	99207506	33933	402569	ENST00000327442.6	KPNA7	21380
692	chr22	50548080	50549279	1200	Promoter (<=1kb)	50548033	50551022	2990	113730	ENST00000395676.4	KLHDC7B	47
693	chr1	200311184	200311426	243	Intron (ENST00000636153.1/554279, intron 4 of 4)	200342544	200373792	31249	554279	ENST00000367355.5	LINC00862	62366
694	chr19	15482318	15482560	243	Promoter (2-3kb)	15468645	15479852	11208	114770	ENST00000340880.4	PGLYRP2	-2466
695	chr13	41735270	41735512	243	Intron (ENST00000379310.7/23078, intron 21 of 44)	41689433	41696119	6687	23078	ENST00000478987.1	VWA8	-39151
696	chr14	66612472	66613301	830	Intron (ENST00000315266.9/10243, intron 1 of 21)	66509059	66824554	315496	10243	ENST00000556020.1	GPHN	103413
697	chr1	236073609	236077027	3419	Distal Intergenic	235975830	236065162	89333	4811	ENST00000264187.6	NID1	-8447
698	chr6	73537284	73538674	1391	Intron (ENST00000431108.5/ENST00000431108.5, intron 2 of 2)	73519341	73523797	4457	1915	ENST00000455918.1	EEF1A1	-13487
699	chr10	50495384	50495747	364	Intron (ENST00000429490.5/259230, intron 3 of 9)	50459941	50466932	6992	259230	ENST00000498514.5	SGMS1	-28452
700	chr7	15369116	15369358	243	Promoter (2-3kb)	15358214	15366222	8009	392636	ENST00000418075.1	AGMO	-2894
701	chr7	26297556	26298027	472	Intron (ENST00000446848.6/29887, intron 1 of 6)	26293054	26374329	81276	29887	ENST00000396376.5	SNX10	4502
702	chr12	21147980	21148435	456	Intron (ENST00000543498.5/338821, intron 5 of 5)	21131202	21239246	108045	10599	ENST00000256958.2	SLCO1B1	16778
703	chr18	74223044	74223286	243	Intron (ENST00000580403.1/ENST00000580403.1, intron 1 of 1)	74253554	74261177	7624	1528	ENST00000579064.1	CYB5A	37891
704	chr1	226958258	226958706	449	Exon (ENST00000438895.1/ENST00000438895.1, exon 1 of 1)	226974855	226977487	2633	56997	ENST00000476488.1	COQ8A	-16149
705	chr1	61234488	61234798	311	Intron (ENST00000371191.5/4774, intron 2 of 10)	61248998	61253484	4487	645030	ENST00000630199.2	NFIA-AS1	18686
706	chr12	90921878	90922870	993	Intron (ENST00000546725.1/439916, intron 1 of 4)	90918023	90948669	30647	439916	ENST00000546725.1	LINC00615	3855
707	chr1	1760614	1760856	243	Promoter (2-3kb)	1752471	1758575	6105	65220	ENST00000342348.9	NADK	-2039
708	chr7	67046462	67047384	923	Intron (ENST00000359626.9/55253, intron 7 of 15)	67067138	67238640	171503	55253	ENST00000495971.1	TYW1	-19754
709	chr22	37979768	37983148	3381	Promoter (<=1kb)	37970686	37983414	12729	6663	ENST00000446929.5	SOX10	266
710	chr8	85564032	85564274	243	Distal Intergenic	85656442	85663039	6598	100288527	ENST00000379010.3	REXO1L2P	98765
711	chr2	200101869	200102111	243	Distal Intergenic	199959266	199963836	4571	79568	ENST00000469156.1	MAIP1	142603
712	chr14	95258493	95258735	243	Intron (ENST00000298912.8/79789, intron 1 of 12)	95213225	95296243	83019	79789	ENST00000555336.6	CLMN	37508
713	chr12	20845316	20845708	393	Intron (ENST00000540853.5/28234, intron 2 of 7)	20855092	20861054	5963	28234	ENST00000545880.1	SLCO1B3	-9384
714	chr4	22741911	22742360	450	Intron (ENST00000610628.4/57733, intron 2 of 5)	22754413	22819282	64870	57733	ENST00000508264.1	GBA3	-12053
715	chr13	74170896	74171324	429	Distal Intergenic	74231457	74259976	28520	100507612	ENST00000419499.1	LINC00402	-60133
716	chr1	27108154	27109666	1513	Exon (ENST00000263980.7/6548, exon 3 of 12)	27098815	27104022	5208	6548	ENST00000374089.5	SLC9A1	-4132
717	chr11	13295617	13295859	243	Intron (ENST00000529050.5/406, intron 1 of 2)	13309986	13357096	47111	406	ENST00000531665.5	ARNTL	-14127
718	chr1	186057186	186057428	243	Exon (ENST00000271588.8/83872, exon 46 of 107)	185963808	185978145	14338	83872	ENST00000493413.1	HMCN1	93378
719	chr6	119304688	119304930	243	Intron (ENST00000368468.3/4121, intron 3 of 12)	119177209	119349761	172553	4121	ENST00000368468.3	MAN1A1	44831
720	chr2	118080809	118081122	314	Distal Intergenic	118088452	118108372	19921	51141	ENST00000411929.5	INSIG2	-7330
721	chr11	26478485	26478868	384	Intron (ENST00000525139.5/63982, intron 4 of 26)	26473902	26660820	186919	63982	ENST00000531568.1	ANO3	4583
722	chr3	136258791	136259033	243	Promoter (1-2kb)	136260150	136330169	70020	5096	ENST00000473073.1	PCCB	-1117
723	chr11	57414194	57414436	243	Promoter (2-3kb)	57407531	57416653	9123	29015	ENST00000525205.5	SLC43A3	2217
724	chr10	26493777	26494144	368	Intron (ENST00000376236.8/54518, intron 3 of 14)	26438425	26501938	63514	54518	ENST00000356785.4	APBB1IP	55352
725	chr11	121329243	121329670	428	Distal Intergenic	121305750	121307843	2094	6309	ENST00000527183.1	SC5D	23493
726	chr17	45915217	45915858	642	Intron (ENST00000262410.9/4137, intron 1 of 13)	45895783	45898798	3016	100130148	ENST00000624111.2	MAPT-IT1	19434
727	chr12	92438777	92439085	309	Intron (ENST00000508671.1/100507616, intron 1 of 1)	92420094	92428148	8055	574016	ENST00000646751.1	CLLU1OS	-10629
728	chr1	229189430	229193229	3800	Distal Intergenic	229258281	229271003	12723	105373159	ENST00000429227.1	LOC105373159	77774
729	chr17	66505834	66506300	467	Intron (ENST00000578063.5/5578, intron 3 of 9)	66398069	66416854	18786	101928001	ENST00000584715.5	PRKCA-AS1	-88980
730	chr3	120550278	120551053	776	Distal Intergenic	120596309	120602500	6192	4710	ENST00000184266.2	NDUFB4	-45256
731	chr17	67489875	67490117	243	Intron (ENST00000299954.13/26207, intron 1 of 8)	67471489	67471585	97	693131	ENST00000582790.2	MIR548D2	-18290
732	chr3	27365962	27366204	243	Promoter (2-3kb)	27309157	27369196	60040	152110	ENST00000491627.1	NEK10	2992
733	chr10	67116293	67116737	445	Intron (ENST00000433211.6/29119, intron 7 of 17)	66766155	67180443	414289	29119	ENST00000494580.1	CTNNA3	63706
734	chr5	42838132	42838465	334	Intron (ENST00000514218.5/6414, intron 1 of 4)	42800131	42825896	25766	6414	ENST00000506577.5	SELENOP	-12236
735	chr14	21018262	21019354	1093	Promoter (<=1kb)	21016838	21018814	1977	57447	ENST00000555650.5	NDRG2	0
736	chr7	127593168	127593410	243	Promoter (<=1kb)	127582820	127593606	10787	79571	ENST00000497650.1	GCC1	196
737	chr10	77493226	77499865	6640	Promoter (<=1kb)	77183473	77498970	315498	3778	ENST00000640311.1	KCNMA1	0
738	chr15	96735768	96736070	303	Distal Intergenic	96772005	96781654	9650	100652749	ENST00000560888.5	SPATA8-AS1	45584
739	chr2	100125064	100126507	1444	Intron (ENST00000317233.8/3899, intron 1 of 23)	99547256	100142575	595320	3899	ENST00000317233.8	AFF3	16068
740	chr16	70098862	70099364	503	Distal Intergenic	70113626	70162537	48912	55066	ENST00000288050.8	PDPR	-14262
741	chr3	93964621	93964929	309	Intron (ENST00000394236.8/5627, intron 1 of 14)	93873109	93958754	85646	5627	ENST00000648381.1	PROS1	-5867
742	chr10	99432576	99433568	993	Promoter (1-2kb)	99396870	99431569	34700	2805	ENST00000370508.6	GOT1	-1007
743	chr19	13067061	13067303	243	Promoter (2-3kb)	13070003	13074019	4017	4784	ENST00000588680.1	NFIX	-2700
744	chr15	61027854	61029009	1156	Intron (ENST00000335670.10/6095, intron 1 of 10)	60511294	61229133	717840	6095	ENST00000551975.5	RORA	200124
745	chr10	95115045	95123704	8660	Distal Intergenic	95038959	95069497	30539	1558	ENST00000479946.2	CYP2C8	-45548
746	chr4	145504377	145504974	598	Promoter (1-2kb)	145497073	145502971	5899	101927659	ENST00000508936.1	SMAD1-AS2	-1406
747	chr12	109704994	109705297	304	Distal Intergenic	109714228	109770507	56280	84915	ENST00000538780.1	FAM222A	-8931
748	chr4	76505085	76505538	454	Intron (ENST00000296043.6/57619, intron 1 of 10)	76555614	76754586	198973	57619	ENST00000469923.5	SHROOM3	-50076
749	chrX	67610124	67610487	364	Intron (ENST00000396044.7/367, intron 1 of 4)	67568889	67724288	155400	367	ENST00000396043.2	AR	41235
750	chr4	15555217	15555459	243	Intron (ENST00000424120.5/57545, intron 20 of 36)	15550738	15557373	6636	57545	ENST00000512202.1	CC2D2A	4479
751	chr6	21130233	21130905	673	Intron (ENST00000274695.8/54901, intron 13 of 15)	21200812	21231441	30630	54901	ENST00000476517.1	CDKAL1	-69907
752	chr18	35116909	35119628	2720	Intron (ENST00000591734.5/10982, intron 5 of 5)	35131918	35140497	8580	10982	ENST00000588085.1	MAPRE2	-12290
753	chr17	75489973	75490970	998	Promoter (<=1kb)	75490058	75491079	1022	9772	ENST00000580849.5	TMEM94	0
754	chr3	164489037	164489344	308	Distal Intergenic	164714095	164731036	16942	104355289	ENST00000463978.1	LINC01324	241692
755	chr15	71726026	71726268	243	Intron (ENST00000355327.7/79875, intron 8 of 17)	71660530	71733932	73403	79875	ENST00000567776.2	THSD4	65496
756	chr18	1778656	1779662	1007	Intron (ENST00000580524.1/ENST00000580524.1, intron 2 of 2)	1268311	1407180	138870	56651	ENST00000412816.7	LINC00470	-371476
757	chr12	120866816	120867058	243	Intron (ENST00000353487.6/121665, intron 1 of 10)	120782690	120835657	52968	121665	ENST00000543181.5	SPPL3	-31159
758	chr9	109262214	109262456	243	Intron (ENST00000374566.7/54566, intron 6 of 25)	109171975	109320964	148990	54566	ENST00000374566.7	EPB41L4B	58508
759	chr18	49993237	49995471	2235	Intron (ENST00000285039.11/4645, intron 5 of 39)	49826260	49902833	76574	4645	ENST00000324581.10	MYO5B	-90404
760	chr8	144313841	144315803	1963	Promoter (<=1kb)	144313041	144314204	1164	3297	ENST00000528842.1	HSF1	800
761	chr1	54844985	54845227	243	Distal Intergenic	54806102	54842252	36151	163747	ENST00000371273.3	LEXM	38883
762	chr9	122295952	122296194	243	Intron (ENST00000297908.7/92399, intron 4 of 5)	122270864	122323461	52598	92399	ENST00000394315.3	MRRF	25088
763	chr7	17180927	17181169	243	Intron (ENST00000645559.1/ENST00000645559.1, intron 1 of 1)	17132190	17346150	213961	196	ENST00000642825.1	AHR	48737
764	chr4	87489833	87490075	243	Intron (ENST00000282470.10/8404, intron 7 of 10)	87494417	87528619	34203	8404	ENST00000535835.5	SPARCL1	38544
765	chr6	31922957	31923346	390	Promoter (2-3kb)	31920096	31935990	15895	717	ENST00000484636.1	C2	2861
766	chr5	41995623	41995997	375	Distal Intergenic	41939298	41941570	2273	26272	ENST00000505566.1	FBXO4	56325
767	chr15	60512251	60512617	367	Promoter (<=1kb)	60505606	60512097	6492	6095	ENST00000559587.1	RORA	-154
768	chr12	23846438	23846680	243	Intron (ENST00000546136.5/6660, intron 1 of 13)	23529500	23896026	366527	6660	ENST00000546136.5	SOX5	49346
769	chr4	34191880	34192122	243	Intron (ENST00000513843.5/105374394, intron 1 of 3)	34120894	34259127	138234	105374394	ENST00000513843.5	LINC02484	67005
770	chr10	23480269	23480511	243	Distal Intergenic	23439458	23442390	2933	220213	ENST00000376495.4	OTUD1	40811
771	chr1	89147261	89148700	1440	Promoter (1-2kb)	89106132	89150456	44325	2634	ENST00000464839.5	GBP2	1756
772	chr7	158264558	158264800	243	Intron (ENST00000389413.7/5799, intron 3 of 21)	158110825	158205277	94453	5799	ENST00000404321.3	PTPRN2	-59281
773	chr17	66690471	66690713	243	Intron (ENST00000578063.5/5578, intron 8 of 9)	66787072	66787168	97	693219	ENST00000385208.1	MIR634	-96359
774	chr11	86156423	86156665	243	Distal Intergenic	85958839	86069882	111044	8301	ENST00000528398.5	PICALM	-86541
775	chr1	228664124	228664546	423	Distal Intergenic	228646040	228646158	119	100169768	ENST00000363500.1	RNA5S17	-17966
776	chr5	67775789	67776031	243	Intron (ENST00000514368.1/101928858, intron 2 of 4)	67793214	67801058	7845	101928858	ENST00000513234.5	LOC101928858	-17183
777	chr3	12609673	12610099	427	Promoter (<=1kb)	12600199	12608867	8669	5894	ENST00000491290.1	RAF1	-806
778	chr4	1047591	1048060	470	Distal Intergenic	1056866	1073754	16889	285498	ENST00000508633.5	RNF212	25694
779	chr22	32082516	32082844	329	Promoter (<=1kb)	32083051	32086326	3276	6523	ENST00000486394.1	SLC5A1	-207
780	chr6	167546550	167546792	243	Distal Intergenic	167666840	167679270	12431	401286	ENST00000609107.1	LINC02538	132478
781	chr14	73555121	73555363	243	Intron (ENST00000553558.5/399671, intron 1 of 17)	73478486	73558921	80436	399671	ENST00000553558.5	HEATR4	3558
782	chr8	104414287	104414918	632	Promoter (2-3kb)	104381177	104411815	30639	1807	ENST00000521372.1	DPYS	-2472
783	chr12	112600323	112600854	532	Intron (ENST00000549736.5/22895, intron 1 of 6)	112591560	112866777	275218	22895	ENST00000547840.5	RPH3A	8763
784	chr8	10693042	10693405	364	Intron (ENST00000304519.9/203076, intron 2 of 3)	10674646	10675838	1193	203076	ENST00000519925.1	C8orf74	18396
785	chr3	135143712	135151812	8101	Exon (ENST00000649588.1/ENST00000649588.1, exon 6 of 7)	135132792	135154402	21611	2047	ENST00000488992.1	EPHB1	10920
786	chr16	82092645	82092887	243	3' UTR	82068277	82098534	30258	3294	ENST00000566838.2	HSD17B2	24368
787	chr9	87413465	87413964	500	Distal Intergenic	87497228	87708631	211404	1612	ENST00000358077.9	DAPK1	-83264
788	chr7	14407872	14408178	307	Intron (ENST00000399322.7/1607, intron 20 of 24)	14149157	14269201	120045	1607	ENST00000493142.1	DGKB	-138671
789	chr4	73853402	73853740	339	Promoter (<=1kb)	73853189	73854155	967	5197	ENST00000226524.3	PF4V1	213
790	chrX	43659217	43659960	744	Promoter (2-3kb)	43656302	43731382	75081	4128	ENST00000497485.1	MAOA	2915
791	chr8	80906778	80910110	3333	Distal Intergenic	80628451	80874781	246331	619279	ENST00000327835.7	ZNF704	-31997
792	chrX	147875011	147879585	4575	Distal Intergenic	147909431	147911817	2387	100126270	ENST00000594922.5	FMR1-AS1	32232
793	chr12	23928087	23928391	305	Intron (ENST00000381381.6/6660, intron 1 of 12)	23845991	23944352	98362	6660	ENST00000538083.1	SOX5	15961
794	chr19	11167981	11170387	2407	Promoter (<=1kb)	11166309	11170415	4107	25959	ENST00000587317.1	KANK2	28
795	chr12	28569545	28571814	2270	3' UTR	28452542	28573446	120905	55297	ENST00000542801.5	CCDC91	117003
796	chr4	118287152	118287458	307	Intron (ENST00000296498.3/8492, intron 11 of 12)	118279190	118279320	131	677809	ENST00000384096.1	SNORA24	7962
797	chr13	94169117	94171320	2204	Intron (ENST00000377047.8/10082, intron 4 of 8)	94154193	94187991	33799	100873972	ENST00000436329.2	GPC6-AS1	16671
798	chr6	108660571	108660873	303	Intron (ENST00000343882.10/2309, intron 2 of 3)	108656346	108680751	24406	2309	ENST00000540898.1	FOXO3	4225
799	chr19	15869573	15870732	1160	Distal Intergenic	15851993	15864904	12912	102724279	ENST00000589345.6	LINC01835	-4669
800	chr2	200697852	200700481	2630	Promoter (1-2kb)	200695917	200748040	52124	107161151	ENST00000502600.5	AOX3P-AOX2P	1935
801	chr6	131571915	131579430	7516	Promoter (<=1kb)	131573144	131584332	11189	383	ENST00000368087.7	ARG1	0
802	chr8	22568653	22568991	339	Promoter (1-2kb)	22567038	22571821	4784	10174	ENST00000523348.1	SORBS3	1615
803	chr11	68347663	68347905	243	Exon (ENST00000294304.11/4041, exon 2 of 23)	68312684	68449272	136589	4041	ENST00000529993.5	LRP5	34979
804	chr18	11039707	11041076	1370	Intron (ENST00000302079.10/63895, intron 2 of 50)	10670241	11148588	478348	63895	ENST00000302079.10	PIEZO2	107512
805	chr22	19114675	19114980	306	Intron (ENST00000537045.5/9993, intron 1 of 8)	19036286	19122407	86122	9993	ENST00000389262.8	DGCR2	7427
806	chrX	30605106	30605425	320	Distal Intergenic	30558824	30577844	19021	80231	ENST00000378962.3	CXorf21	-27262
807	chr14	93082807	93083049	243	Intron (ENST00000267615.10/3705, intron 2 of 10)	93067452	93072152	4701	319085	ENST00000553639.1	ITPK1-AS1	15355
808	chr11	128146424	128149177	2754	Intron (ENST00000649115.1/ENST00000649115.1, intron 2 of 8)	128208749	128241433	32685	105369564	ENST00000650607.1	LINC02098	-59572
809	chr15	82193766	82194220	455	Intron (ENST00000268206.11/79631, intron 15 of 19)	82214783	82215663	881	79631	ENST00000560095.1	EFL1	21443
810	chr12	67410560	67411896	1337	Distal Intergenic	67440998	67442559	1562	102724433	ENST00000543387.1	LINC02420	30663
811	chr1	162107408	162108437	1030	Intron (ENST00000530878.5/9722, intron 1 of 9)	162070090	162367492	297403	9722	ENST00000430120.3	NOS1AP	37318
812	chr2	100842219	100846047	3829	Intron (ENST00000335681.9/4862, intron 1 of 20)	100821025	100948299	127275	4862	ENST00000427413.5	NPAS2	21194
813	chr12	7375891	7376133	243	Exon (ENST00000313599.7/283316, exon 10 of 20)	7375510	7379266	3757	283316	ENST00000544331.1	CD163L1	3133
814	chr12	132271450	132271912	463	Intron (ENST00000328957.12/50614, intron 2 of 10)	132257851	132275218	17368	50614	ENST00000535208.1	GALNT9	3306
815	chr3	10484450	10484976	527	Intron (ENST00000397077.6/491, intron 1 of 19)	10326275	10505531	179257	491	ENST00000643662.1	ATP2B2	20555
816	chr2	208328493	208328735	243	Intron (ENST00000264380.8/200576, intron 21 of 41)	208334372	208336865	2494	200576	ENST00000474721.1	PIKFYVE	-5637
817	chr4	3440756	3444123	3368	Promoter (<=1kb)	3441887	3449495	7609	3083	ENST00000382774.7	HGFAC	0
818	chr7	158630534	158630920	387	Downstream (<1kb)	158658338	158665232	6895	54892	ENST00000475918.5	NCAPG2	34312
819	chr1	186311078	186311946	869	3' UTR	186318505	186322701	4197	7175	ENST00000467810.1	TPR	10755
820	chr4	37902481	37904183	1703	Promoter (<=1kb)	37901998	38137743	235746	23216	ENST00000615497.4	TBC1D1	483
821	chr2	85513748	85514313	566	Distal Intergenic	85539165	85545280	6116	4144	ENST00000306434.7	MAT2A	-24852
822	chr6	160711551	160713690	2140	3' UTR	160706375	160708317	1943	5340	ENST00000471691.1	PLG	5176
823	chr17	81024630	81024872	243	Intron (ENST00000576859.1/ENST00000576859.1, intron 1 of 1)	81029130	81034573	5444	440465	ENST00000577066.2	BAIAP2-DT	9701
824	chr1	185895174	185895701	528	Intron (ENST00000271588.8/83872, intron 4 of 106)	185957069	185993437	36369	83872	ENST00000485744.5	HMCN1	-61368
825	chr11	3040075	3046980	6906	Promoter (<=1kb)	3038131	3040088	1958	833	ENST00000465207.5	CARS	0
826	chr8	25357139	25360699	3561	3' UTR	25351393	25364777	13385	80005	ENST00000481728.2	DOCK5	5746
827	chr17	54852618	54852985	368	Distal Intergenic	54899387	54937316	37930	10040	ENST00000570371.5	TOM1L1	-46402
828	chr2	60913976	60914356	381	Intron (ENST00000295025.12/5966, intron 4 of 10)	60894397	60901083	6687	5966	ENST00000642725.1	REL	19579
829	chr5	10277604	10280144	2541	Promoter (2-3kb)	10275875	10282288	6414	134147	ENST00000503834.1	CMBL	2144
830	chr17	1548636	1549278	643	Intron (ENST00000313486.11/5306, intron 3 of 11)	1534169	1553072	18904	5306	ENST00000574991.5	PITPNA	3794
831	chr1	61235726	61236479	754	Intron (ENST00000371191.5/4774, intron 2 of 10)	61248998	61253484	4487	645030	ENST00000630199.2	NFIA-AS1	17005
832	chr9	109970434	109971271	838	Intron (ENST00000374530.7/445815, intron 6 of 10)	110048598	110169909	121312	11217	ENST00000434623.6	AKAP2	-77327
833	chr5	6755712	6756095	384	3' UTR	6750380	6751489	1110	11044	ENST00000514410.1	TENT4A	5332
834	chr19	4354425	4354870	446	Promoter (<=1kb)	4354949	4360079	5131	84954	ENST00000594162.1	MPND	-79
835	chr16	56539856	56540726	871	Distal Intergenic	56484385	56520283	35899	583	ENST00000245157.9	BBS2	-19573
836	chr2	85762364	85762606	243	Promoter (1-2kb)	85760749	85781167	20419	84913	ENST00000473116.1	ATOH8	1615
837	chr3	96333405	96333894	490	Distal Intergenic	96359964	96360039	76	102465864	ENST00000615894.1	MIR8060	-26070
838	chr10	95433967	95436726	2760	Exon (ENST00000371227.8/10580, exon 5 of 32)	95315059	95441135	126077	10580	ENST00000354106.7	SORBS1	4409
839	chr2	58965489	58965731	243	Intron (ENST00000452840.5/400955, intron 6 of 11)	58924602	58931076	6475	400955	ENST00000422793.1	LINC01122	40887
840	chr16	29693246	29695168	1923	Exon (ENST00000449759.1/23475, exon 3 of 3)	29679182	29697524	18343	23475	ENST00000562473.1	QPRT	14064
841	chr4	128173045	128173733	689	Intron (ENST00000326639.10/55132, intron 12 of 19)	128179314	128222595	43282	55132	ENST00000508648.5	LARP1B	-5581
842	chr10	116214104	116214346	243	Intron (ENST00000369236.5/2674, intron 3 of 8)	116056925	116272282	215358	2674	ENST00000369236.5	GFRA1	57936
843	chr18	6214705	6215081	377	Intron (ENST00000400105.6/91133, intron 11 of 19)	6256747	6260934	4188	101927150	ENST00000578427.1	L3MBTL4-AS1	-41666
844	chr11	114205869	114206701	833	Intron (ENST00000335953.8/7704, intron 4 of 6)	114180766	114247296	66531	7704	ENST00000545851.5	ZBTB16	25103
845	chr9	8777159	8777593	435	Intron (ENST00000381196.8/5789, intron 8 of 42)	8317277	8733949	416673	5789	ENST00000540109.5	PTPRD	-43210
846	chr3	39793754	39794146	393	Distal Intergenic	39808914	40258166	449253	25924	ENST00000444716.5	MYRIP	-14768
847	chr2	100832500	100833463	964	Intron (ENST00000335681.9/4862, intron 1 of 20)	100821025	100948299	127275	4862	ENST00000427413.5	NPAS2	11475
848	chr16	1883669	1885332	1664	Promoter (<=1kb)	1833987	1884294	50308	254528	ENST00000470044.5	MEIOB	0
849	chr12	54684902	54686179	1278	Exon (ENST00000552524.1/ENST00000552524.1, exon 2 of 3)	54644630	54648493	3864	117159	ENST00000546807.5	DCD	-36409
850	chr17	57279941	57280183	243	Exon (ENST00000623762.1/ENST00000623762.1, exon 1 of 1)	57285844	57680297	394454	124540	ENST00000442934.6	MSI2	-5661
851	chr6	18597913	18600984	3072	Intron (ENST00000637804.1/105374956, intron 4 of 5)	18571784	18571880	97	693125	ENST00000385041.1	MIR548A1	26129
852	chr1	82722503	82722745	243	Intron (ENST00000650063.1/ENST00000650063.1, intron 3 of 6)	82903183	83166815	263633	103283057	ENST00000452901.5	LINC01362	-180438
853	chr22	29334695	29335788	1094	Promoter (1-2kb)	29333158	29333267	110	100113380	ENST00000625572.1	SNORD125	-1428
854	chr7	102257768	102258943	1176	3' UTR	102274174	102283932	9759	1523	ENST00000487284.2	CUX1	-15231
855	chr15	97755417	97755719	303	Intron (ENST00000647870.1/91948, intron 5 of 9)	97629206	97835939	206734	91948	ENST00000647870.1	LINC00923	80220
856	chr7	121001082	121001751	670	Intron (ENST00000310396.9/79974, intron 2 of 22)	120989799	121097815	108017	79974	ENST00000520801.5	CPED1	11283
857	chrX	46529926	46530417	492	Promoter (<=1kb)	46527723	46529668	1946	641339	ENST00000453909.3	ZNF674	-258
858	chr7	73721773	73722416	644	Promoter (2-3kb)	73704180	73719672	15493	6804	ENST00000462135.1	STX1A	-2101
859	chr8	122735789	122736876	1088	Distal Intergenic	122670385	122694106	23722	104266958	ENST00000521608.1	LINC01151	-41683
860	chr9	82565007	82565249	243	Intron (ENST00000637606.1/ENST00000637606.1, intron 9 of 9)	82979585	83063128	83544	158158	ENST00000376447.3	RASEF	497879
861	chr8	65212062	65212635	574	Distal Intergenic	65167733	65184210	16478	552859	ENST00000650029.1	LINC00251	-27852
862	chr6	90242630	90242958	329	Intron (ENST00000257749.8/60468, intron 3 of 8)	90089054	90218245	129192	60468	ENST00000493201.5	BACH2	-24385
863	chr3	66289680	66291082	1403	Intron (ENST00000354883.10/115286, intron 6 of 10)	66261595	66370584	108990	115286	ENST00000484768.1	SLC25A26	28085
864	chr1	61358553	61358795	243	Intron (ENST00000371191.5/4774, intron 5 of 10)	61352450	61404226	51777	4774	ENST00000482020.1	NFIA	6103
865	chr1	222625604	222628892	3289	Promoter (<=1kb)	222628474	222654661	26188	375056	ENST00000354906.7	MIA3	0
866	chr1	167967749	167968796	1048	Promoter (<=1kb)	167968490	167991339	22850	55827	ENST00000491067.1	DCAF6	0
867	chr6	154481867	154482796	930	Intron (ENST00000607772.5/154043, intron 1 of 12)	154406110	154478491	72382	154043	ENST00000479339.5	CNKSR3	-3376
868	chr13	89517475	89521366	3892	Distal Intergenic	89477608	89500509	22902	105370308	ENST00000425048.1	LINC01040	-16966
869	chr2	232645020	232645262	243	Intron (ENST00000409613.5/80303, intron 1 of 3)	232638141	232682774	44634	80303	ENST00000409708.5	EFHD1	6879
870	chr10	96277736	96277978	243	Distal Intergenic	96204532	96271587	67056	29760	ENST00000467799.6	BLNK	-6149
871	chr16	12162451	12163143	693	Intron (ENST00000566228.5/92017, intron 13 of 20)	12129697	12527397	397701	92017	ENST00000564791.5	SNX29	32754
872	chr19	995005	996333	1329	Promoter (<=1kb)	994014	994554	541	57418	ENST00000591155.1	WDR18	991
873	chr5	68612577	68613923	1347	Distal Intergenic	68292683	68295743	3061	5295	ENST00000520550.1	PIK3R1	319894
874	chr1	161549431	161550101	671	Promoter (<=1kb)	161541763	161550028	8266	2214	ENST00000443193.5	FCGR3A	0
875	chr9	111609390	111613601	4212	Promoter (<=1kb)	111602831	111613553	10723	652972	ENST00000536054.6	LRRC37A5P	0
876	chr5	39345251	39345493	243	Intron (ENST00000263408.4/735, intron 1 of 10)	39341081	39364495	23415	735	ENST00000467285.1	C9	19002
877	chr2	179730574	179730880	307	Intron (ENST00000410066.6/151126, intron 3 of 9)	179446634	179745854	299221	151126	ENST00000475539.5	ZNF385B	14974
878	chr10	75246201	75246689	489	Distal Intergenic	75235315	75236030	716	118881	ENST00000491270.1	COMTD1	-10171
879	chr9	136556656	136559601	2946	Distal Intergenic	136549130	136549893	764	101928483	ENST00000450304.1	NALT1	7526
880	chr7	21565329	21566255	927	Intron (ENST00000620169.4/8701, intron 6 of 82)	21561091	21570716	9626	8701	ENST00000496218.1	DNAH11	4238
881	chr16	29428096	29430829	2734	Exon (ENST00000532337.1/100422558, exon 16 of 19)	29425800	29447026	21227	100422558	ENST00000532337.1	SMG1P6	16197
882	chr1	199797779	199798158	380	Distal Intergenic	200027602	200177424	149823	2494	ENST00000367362.7	NR5A2	-229444
883	chr13	101758117	101758525	409	Intron (ENST00000376131.8/2259, intron 3 of 4)	101868372	101875294	6923	2259	ENST00000468052.1	FGF14	116769
884	chr10	85994610	85994852	243	Intron (ENST00000327946.11/2894, intron 4 of 15)	86264694	86264788	95	442911	ENST00000362234.2	MIR346	269936
885	chr6	100721147	100721389	243	Intron (ENST00000369162.6/10973, intron 11 of 41)	100848004	100881301	33298	10973	ENST00000468245.2	ASCC3	159912
886	chr2	170894843	170895157	315	Distal Intergenic	170928464	170956514	28051	26003	ENST00000471559.5	GORASP2	-33307
887	chr16	20533949	20534191	243	Downstream (2-3kb)	20537292	20541316	4025	348158	ENST00000564849.1	ACSM2B	7125
888	chr8	101569431	101569673	243	Intron (ENST00000251808.7/79977, intron 4 of 15)	101632226	101664510	32285	79977	ENST00000517674.5	GRHL2	-62553
889	chr14	100644423	100644665	243	Distal Intergenic	100657250	100672775	15526	283601	ENST00000556697.1	LINC00523	-12585
890	chr12	9211745	9212434	690	Distal Intergenic	9148840	9208370	59531	5858	ENST00000261336.6	PZP	-3375
891	chr14	81162409	81166746	4338	Exon (ENST00000646052.1/ENST00000646052.1, exon 2 of 8)	81202695	81202834	140	677845	ENST00000408376.1	SNORA79	36088
892	chr14	89215980	89216292	313	Intron (ENST00000345097.8/1112, intron 4 of 6)	89180759	89223342	42584	1112	ENST00000555010.1	FOXN3	7050
893	chr1	178706754	178706996	243	Distal Intergenic	178725147	178921841	196695	55103	ENST00000367634.6	RALGPS2	-18151
894	chr22	19012007	19012622	616	Intron (ENST00000440005.6/26220, intron 4 of 5)	19023056	19023550	495	26222	ENST00000609839.1	DGCR10	-10434
895	chr11	31640428	31640908	481	Intron (ENST00000640961.1/26610, intron 7 of 9)	31645906	31783723	137818	26610	ENST00000638828.1	ELP4	-4998
896	chr10	12841526	12841768	243	Distal Intergenic	12760576	12829736	69161	57118	ENST00000615792.1	CAMK1D	80950
897	chr5	115722638	115723905	1268	Distal Intergenic	115620628	115632992	12365	100302736	ENST00000508420.1	TMED7-TICAM2	-89646
898	chr10	72542254	72543279	1026	Intron (ENST00000398761.8/10367, intron 4 of 11)	72367340	72551198	183859	10367	ENST00000476605.7	MICU1	7919
899	chr1	244094288	244097410	3123	Distal Intergenic	244051283	244057476	6194	10472	ENST00000358704.4	ZBTB18	43005
900	chr11	40421067	40421309	243	Intron (ENST00000528697.5/57689, intron 3 of 6)	40114205	40319730	205526	57689	ENST00000619527.4	LRRC4C	-101337
901	chr6	159940346	159945408	5063	Distal Intergenic	159969099	160111504	142406	3482	ENST00000356956.5	IGF2R	-23691
902	chr1	220965006	220965443	438	Distal Intergenic	220881069	220884493	3425	3142	ENST00000427693.1	HLX	83937
903	chr17	39827435	39829318	1884	Intron (ENST00000346872.7/22806, intron 3 of 7)	39765790	39864126	98337	22806	ENST00000346243.7	IKZF3	34808
904	chr11	111964019	111964261	243	Intron (ENST00000529225.5/85458, intron 2 of 5)	111976906	111989055	12150	85458	ENST00000614104.4	DIXDC1	-12645
905	chr3	72306939	72308942	2004	Distal Intergenic	72061061	72279503	218443	285286	ENST00000626474.2	LINC00877	-27436
906	chr8	57852180	57853514	1335	Promoter (1-2kb)	57855500	57984114	128615	100505477	ENST00000650579.1	LINC01602	-1986
907	chrX	46459692	46460538	847	Intron (ENST00000344302.8/55634, intron 3 of 5)	46448233	46473594	25362	55634	ENST00000487081.1	KRBOX4	11459
908	chr8	52293345	52294282	938	Intron (ENST00000276480.11/9705, intron 2 of 25)	52220564	52254348	33785	9705	ENST00000521119.1	ST18	-38997
909	chr2	101895185	101895427	243	Distal Intergenic	101867856	101870085	2230	9448	ENST00000491743.1	MAP4K4	27329
910	chr11	114032655	114032897	243	Distal Intergenic	114059593	114250676	191084	7704	ENST00000335953.8	ZBTB16	-26696
911	chr6	158174009	158174335	327	Intron (ENST00000648328.1/404672, intron 2 of 3)	158168352	158199344	30993	404672	ENST00000607778.1	GTF2H5	5657
912	chr6	166409873	166410115	243	3' UTR	166412296	166423984	11689	6196	ENST00000509742.1	RPS6KA2	13869
913	chr3	100544184	100544426	243	Intron (ENST00000323523.8/55076, intron 1 of 5)	100568822	100570914	2093	55076	ENST00000485260.1	TMEM45A	-24396
914	chr1	87449527	87449769	243	Distal Intergenic	87353524	87371655	18132	100505768	ENST00000452509.1	LINC01364	-77872
915	chr13	39698860	39699653	794	3' UTR	39687543	39689820	2278	57511	ENST00000460701.1	COG6	11317
916	chr12	51674990	51675440	451	Intron (ENST00000638820.1/6334, intron 2 of 11)	51686423	51745948	59526	6334	ENST00000551216.2	SCN8A	-10983
917	chr3	58240791	58242642	1852	Promoter (2-3kb)	58238422	58271061	32640	57406	ENST00000485900.1	ABHD6	2369
918	chr3	67543377	67543733	357	Intron (ENST00000493112.5/8801, intron 2 of 10)	67374719	67528222	153504	8801	ENST00000460567.5	SUCLG2	-15155
919	chr8	26824757	26825266	510	Intron (ENST00000380586.5/148, intron 1 of 2)	26770210	26854574	84365	148	ENST00000518621.1	ADRA1A	29308
920	chr17	57080556	57080798	243	Intron (ENST00000576871.1/ENST00000576871.1, intron 1 of 2)	57085092	57106023	20932	8165	ENST00000575322.1	AKAP1	-4294
921	chr9	86373219	86374002	784	Distal Intergenic	86287733	86354454	66722	79670	ENST00000375960.6	TUT7	-18765
922	chr13	110060982	110066955	5974	Distal Intergenic	110053285	110054952	1668	104355146	ENST00000411690.2	LINC00396	7697
923	chr3	39937111	39937780	670	Intron (ENST00000444716.5/25924, intron 2 of 16)	39810487	40162962	352476	25924	ENST00000475082.5	MYRIP	126624
924	chr12	24494087	24494529	443	Intron (ENST00000646273.1/6660, intron 1 of 16)	24367935	24562382	194448	6660	ENST00000538905.1	SOX5	67853
925	chr11	126385945	126386794	850	Intron (ENST00000534733.6/6484, intron 2 of 4)	126392175	126407627	15453	6484	ENST00000526311.5	ST3GAL4	-5381
926	chr1	94934386	94934628	243	Intron (ENST00000452846.5/729970, intron 3 of 3)	94928028	94963270	35243	729970	ENST00000438509.1	LOC729970	6358
927	chr22	32145040	32145462	423	Distal Intergenic	32149180	32149926	747	150297	ENST00000490640.1	C22orf42	4464
928	chr12	24022197	24022499	303	Intron (ENST00000646273.1/6660, intron 5 of 16)	23534048	23951032	416985	6660	ENST00000545921.5	SOX5	-71165
929	chr5	52878903	52879618	716	Intron (ENST00000282588.6/3672, intron 6 of 28)	52864971	52882927	17957	3672	ENST00000509049.1	ITGA1	13932
930	chr10	30983020	30983528	509	Promoter (<=1kb)	30844634	30984426	139793	220929	ENST00000331737.10	ZNF438	898
931	chr21	41573738	41576676	2939	Exon (ENST00000418874.1/ENST00000418874.1, exon 2 of 2)	41467734	41531116	63383	7113	ENST00000454499.5	TMPRSS2	-42622
932	chr12	30427855	30428159	305	Distal Intergenic	30631626	30637149	5524	10526	ENST00000535598.1	IPO8	208990
933	chr2	224443584	224444703	1120	Distal Intergenic	224473902	224480124	6223	8452	ENST00000497715.1	CUL3	35421
934	chr16	67801518	67801929	412	Intron (ENST00000317506.7/57610, intron 2 of 13)	67735645	67806518	70874	57610	ENST00000602887.1	RANBP10	4589
935	chr18	63399652	63400307	656	Promoter (2-3kb)	63390863	63397124	6262	9525	ENST00000588323.1	VPS4B	-2528
936	chr8	1893840	1894208	369	Intron (ENST00000635855.1/9639, intron 13 of 29)	1904235	1923490	19256	9639	ENST00000524212.1	ARHGEF10	-10027
937	chr22	20100896	20103332	2437	Promoter (2-3kb)	20106182	20107575	1394	54487	ENST00000495351.1	DGCR8	-2850
938	chr22	41400084	41400326	243	Distal Intergenic	41382935	41394274	11340	7008	ENST00000413942.1	TEF	17149
939	chr9	108864058	108865880	1823	Promoter (1-2kb)	108862266	108863759	1494	10881	ENST00000333999.4	ACTL7A	1792
940	chr3	126734495	126735125	631	Intron (ENST00000290913.7/84303, intron 4 of 7)	126730564	126960391	229828	84303	ENST00000513253.1	CHCHD6	3931
941	chr5	113110009	113110390	382	Intron (ENST00000302475.8/4163, intron 4 of 16)	113101543	113104625	3083	4163	ENST00000505604.1	MCC	-5384
942	chr12	109172985	109174386	1402	Promoter (1-2kb)	109175977	109180040	4064	32	ENST00000543080.1	ACACB	-1591
943	chr20	7934948	7942910	7963	Promoter (<=1kb)	7882981	7940474	57494	54363	ENST00000378789.3	HAO1	0
944	chr15	79655140	79657083	1944	Distal Intergenic	79456096	79471144	15049	23251	ENST00000559272.1	MINAR1	199044
945	chr11	14547673	14548047	375	Intron (ENST00000418988.2/5682, intron 2 of 10)	14504876	14520696	15821	5682	ENST00000396394.6	PSMA1	-26977
946	chr7	8143485	8143727	243	Intron (ENST00000402384.7/3382, intron 9 of 13)	8141765	8157764	16000	3382	ENST00000470696.1	ICA1	14037
947	chr22	46112990	46115293	2304	Promoter (<=1kb)	46113566	46113657	92	100616143	ENST00000581461.1	MIR4763	0
948	chr3	196205686	196206425	740	Intron (ENST00000296326.7/131540, intron 5 of 7)	196197452	196211386	13935	131540	ENST00000465519.5	ZDHHC19	4961
949	chr11	3911881	3912570	690	Intron (ENST00000525403.5/6786, intron 1 of 4)	3903463	4059356	155894	6786	ENST00000528656.5	STIM1	8418
950	chr18	57466529	57466771	243	Intron (ENST00000491143.2/9480, intron 1 of 1)	57444376	57476760	32385	9480	ENST00000481727.1	ONECUT2	22153
951	chr10	103412987	103413358	372	Exon (ENST00000649849.1/22984, exon 9 of 36)	103422725	103425090	2366	22984	ENST00000648051.1	PDCD11	-9367
952	chr2	150162539	150162880	342	Distal Intergenic	150234892	150257007	22116	105373683	ENST00000429317.1	LINC01817	94127
953	chr4	103102776	103103078	303	Promoter (2-3kb)	103079435	103099883	20449	56898	ENST00000296424.8	BDH2	-2893
954	chr3	51002269	51002511	243	Intron (ENST00000266037.9/1795, intron 5 of 52)	50675241	51384198	708958	1795	ENST00000266037.9	DOCK3	327028
955	chr10	12360060	12360487	428	Intron (ENST00000619168.4/57118, intron 1 of 10)	12349733	12826143	476411	57118	ENST00000378845.5	CAMK1D	10327
956	chr17	81999059	81999499	441	Intron (ENST00000306729.11/79058, intron 7 of 16)	81995443	82017037	21595	79058	ENST00000582355.6	ASPSCR1	3616
957	chr6	131880738	131880980	243	Intron (ENST00000360971.6/5167, intron 20 of 24)	131868037	131880287	12251	5167	ENST00000647981.1	ENPP1	12701
958	chr4	41281340	41281672	333	Distal Intergenic	41261739	41264465	2727	7345	ENST00000510566.1	UCHL1	19601
959	chr6	5063737	5063979	243	Distal Intergenic	5084581	5089487	4907	648791	ENST00000405617.3	PPP1R3G	-20602
960	chr2	235595353	235595595	243	Intron (ENST00000409457.5/116987, intron 1 of 9)	235524324	235744811	220488	116987	ENST00000402604.6	AGAP1	71029
961	chr5	79124133	79124375	243	Promoter (2-3kb)	79121281	79128197	6917	635	ENST00000521279.1	BHMT	2852
962	chr3	56362022	56362264	243	Intron (ENST00000288221.10/26059, intron 2 of 17)	56433789	56434747	959	26059	ENST00000477381.1	ERC2	72483
963	chr1	119305502	119305806	305	Intron (ENST00000457719.1/ENST00000457719.1, intron 1 of 2)	119328176	119330815	2640	105378934	ENST00000420059.5	LINC01780	-22370
964	chr5	35998860	35999169	310	Promoter (1-2kb)	35960756	36001028	40273	133688	ENST00000625798.2	UGT3A1	1859
965	chr2	45278521	45278885	365	Intron (ENST00000427020.6/400952, intron 2 of 7)	45174344	45254941	80598	400952	ENST00000378479.5	LINC01121	-23580
966	chr16	9370435	9370739	305	Intron (ENST00000564305.1/101927009, intron 1 of 2)	9355588	9408093	52506	101927009	ENST00000564305.1	LINC02177	14847
967	chr18	79976310	79976622	313	Promoter (1-2kb)	79973566	79977917	4352	10907	ENST00000592837.1	TXNL4A	1295
968	chr1	207126927	207130186	3260	Exon (ENST00000619568.1/ENST00000619568.1, exon 1 of 1)	207104378	207115465	11088	722	ENST00000424088.1	C4BPA	22549
969	chr2	196075458	196076226	769	Distal Intergenic	195998760	196068812	70053	56171	ENST00000410072.5	DNAH7	-6646
970	chr4	159504837	159506781	1945	Distal Intergenic	159352457	159353569	1113	9693	ENST00000509891.1	RAPGEF2	152380
971	chr2	135628275	135629476	1202	Intron (ENST00000409478.5/23518, intron 5 of 22)	135633712	135639114	5403	23518	ENST00000486532.5	R3HDM1	-4236
972	chrX	150421586	150421903	318	Promoter (<=1kb)	150420999	150469982	48984	10046	ENST00000358892.7	MAMLD1	587
973	chr6	71352938	71353180	243	Intron (ENST00000602823.1/79940, intron 2 of 6)	71376960	71377031	72	407032	ENST00000362224.3	MIR30C2	23851
974	chr1	6444466	6445028	563	Promoter (2-3kb)	6447331	6449056	1726	83715	ENST00000632803.1	ESPN	-2303
975	chr14	66361072	66361379	308	Intron (ENST00000556361.1/ENST00000556361.1, intron 1 of 3)	66411704	66498677	86974	440184	ENST00000641761.1	CCDC196	-50325
976	chr10	89598541	89598857	317	Intron (ENST00000307534.8/53354, intron 3 of 6)	89592747	89592827	81	406901	ENST00000362127.2	MIR107	-5714
977	chr5	115647765	115648681	917	Distal Intergenic	115620628	115632992	12365	100302736	ENST00000508420.1	TMED7-TICAM2	-14773
978	chr5	113282925	113283230	306	Intron (ENST00000302475.8/4163, intron 1 of 16)	113048876	113294938	246063	4163	ENST00000514701.5	MCC	11708
979	chr21	38888318	38890399	2082	Exon (ENST00000434589.1/ENST00000434589.1, exon 1 of 2)	38863676	38912921	49246	400867	ENST00000626259.2	LOC400867	22522
980	chr2	113182787	113183531	745	Promoter (1-2kb)	113185044	113201566	16523	23550	ENST00000409656.5	PSD4	-1513
981	chr2	134459319	134460559	1241	Promoter (<=1kb)	134455760	134459274	3515	81615	ENST00000467316.1	TMEM163	-45
982	chr11	126625931	126630990	5060	Intron (ENST00000525144.6/84623, intron 1 of 16)	126652852	126682103	29252	101929427	ENST00000550747.1	LOC101929427	-21862
983	chr3	126508655	126508897	243	Intron (ENST00000290868.6/131669, intron 3 of 19)	126481855	126517753	35899	131669	ENST00000383579.3	UROC1	8856
984	chr4	118584568	118587996	3429	Distal Intergenic	118591773	118633729	41957	729218	ENST00000567913.2	LOC729218	-3777
985	chr3	168121122	168121686	565	Distal Intergenic	168008677	168095975	87299	27333	ENST00000470487.5	GOLIM4	-25147
986	chr1	244106659	244107356	698	Distal Intergenic	244051283	244057476	6194	10472	ENST00000358704.4	ZBTB18	55376
987	chr2	113201183	113202853	1671	Promoter (2-3kb)	113198558	113202912	4355	23550	ENST00000464559.1	PSD4	2625
988	chr1	111901547	111901789	243	Intron (ENST00000369697.5/3752, intron 1 of 5)	111909336	111910161	826	100873995	ENST00000441125.1	KCND3-AS1	-7547
989	chr15	99672048	99672675	628	Intron (ENST00000354410.9/4205, intron 5 of 10)	99706595	99715962	9368	4205	ENST00000561125.2	MEF2A	-33920
990	chr12	53513073	53513463	391	Promoter (<=1kb)	53513984	53517608	3625	100652999	ENST00000548347.1	LOC100652999	-521
991	chr20	38930978	38931220	243	Intron (ENST00000619304.4/81610, intron 1 of 3)	38926426	38953106	26681	81610	ENST00000619850.1	FAM83D	4552
992	chr15	62970865	62974359	3495	Distal Intergenic	63042632	63066093	23462	7168	ENST00000288398.10	TPM1	-68273
993	chr16	4380147	4380909	763	5' UTR	4371848	4383528	11681	114990	ENST00000304735.3	VASN	8299
994	chr11	101269551	101270289	739	Distal Intergenic	101148150	101209591	61442	101054525	ENST00000531772.1	PGR-AS1	121401
995	chr12	109181835	109182794	960	Intron (ENST00000338432.11/32, intron 11 of 52)	109175977	109180040	4064	32	ENST00000543080.1	ACACB	5858
996	chr17	43065637	43066264	628	Intron (ENST00000352993.7/672, intron 15 of 21)	43067274	43071066	3793	672	ENST00000472490.1	BRCA1	4802
997	chr2	28645917	28646605	689	Intron (ENST00000431376.1/ENST00000431376.1, intron 1 of 1)	28630586	28643267	12682	151056	ENST00000436775.1	PLB1	15331
998	chr6	136499081	136499323	243	Intron (ENST00000617204.4/9053, intron 1 of 17)	136343819	136525983	182165	9053	ENST00000438100.6	MAP7	26660
999	chr6	147588743	147589421	679	Intron (ENST00000566741.1/389432, intron 1 of 1)	147509226	147737547	228322	389432	ENST00000566741.1	SAMD5	79517
1000	chr20	49892306	49894065	1760	Distal Intergenic	49886371	49892242	5872	23315	ENST00000490250.1	SLC9A8	5935
1001	chr3	190804514	190805247	734	Distal Intergenic	190852877	190858060	5184	647309	ENST00000495042.1	GMNC	52813
1002	chr3	128281994	128282236	243	Intron (ENST00000254730.10/60678, intron 4 of 6)	128336904	128341788	4885	60678	ENST00000483569.1	EEFSEC	-54668
1003	chr3	142931455	142932290	836	Intron (ENST00000476385.1/100507389, intron 1 of 4)	142926675	142942534	15860	100507389	ENST00000476385.1	LOC100507389	4780
1004	chr20	46924131	46924433	303	Intron (ENST00000327619.9/2139, intron 1 of 15)	46894870	47188844	293975	2139	ENST00000497062.6	EYA2	29261
1005	chr4	69855931	69856588	658	Intron (ENST00000226444.3/6783, intron 2 of 7)	69849126	69860145	11020	6783	ENST00000504002.1	SULT1E1	3557
1006	chr10	115819565	115819807	243	Intron (ENST00000355044.7/26033, intron 27 of 28)	115909351	115944959	35609	26033	ENST00000449616.2	ATRNL1	-89544
1007	chr2	88013241	88013483	243	Distal Intergenic	87980714	87992858	12145	400966	ENST00000617314.1	RGPD1	-20383
1008	chr9	101205018	101205386	369	Intron (ENST00000374874.7/54886, intron 2 of 7)	101185035	101325131	140097	54886	ENST00000395056.2	PLPPR1	19983
1009	chr2	43844047	43849107	5061	Exon (ENST00000644611.1/64241, exon 2 of 9)	43838975	43878466	39492	64241	ENST00000272286.3	ABCG8	5072
1010	chr14	21045680	21049487	3808	Promoter (<=1kb)	21018457	21048533	30077	57447	ENST00000555026.5	NDRG2	0
1011	chr15	30793108	30793728	621	Exon (ENST00000527159.2/ENST00000527159.2, exon 2 of 19)	30815271	30844153	28883	390561	ENST00000570209.1	HERC2P10	-21543
1012	chr17	18343663	18344231	569	Promoter (2-3kb)	18327873	18341655	13783	6470	ENST00000395684.5	SHMT1	-2008
1013	chr12	108879154	108884195	5042	Promoter (<=1kb)	108880030	108901043	21014	1610	ENST00000228476.7	DAO	0
1014	chr5	113332143	113332385	243	Intron (ENST00000416046.2/ENST00000416046.2, intron 1 of 4)	113022099	113294949	272851	4163	ENST00000302475.8	MCC	-37194
1015	chr14	88030217	88030714	498	Intron (ENST00000556033.5/283587, intron 2 of 3)	88018605	88026312	7708	101928791	ENST00000557631.5	LINC01147	-3905
1016	chr17	13923518	13923828	311	Intron (ENST00000602743.1/100874058, intron 1 of 4)	14029292	14069458	40167	100874058	ENST00000449363.1	COX10-AS1	145630
1017	chr1	214070169	214073027	2859	Exon (ENST00000637598.1/ENST00000637598.1, exon 2 of 5)	213989718	213996964	7247	5629	ENST00000607425.1	PROX1	80451
1018	chr11	19828514	19830432	1919	Intron (ENST00000360655.8/89797, intron 1 of 37)	19813718	19832601	18884	89797	ENST00000650578.1	NAV2	14796
1019	chr1	185719339	185720353	1015	Distal Intergenic	185734551	186190949	456399	83872	ENST00000271588.8	HMCN1	-14198
1020	chrX	36947459	36947829	371	Distal Intergenic	37008397	37011666	3270	442444	ENST00000358047.4	FAM47C	-60568
1021	chr2	107896861	107897103	243	Distal Intergenic	107826937	107890841	63905	285190	ENST00000408999.3	RGPD4	69924
1022	chr8	144022781	144023174	394	Intron (ENST00000377470.7/375686, intron 1 of 4)	143985891	144012772	26882	84875	ENST00000530478.5	PARP10	-10009
1023	chr6	160694479	160694889	411	Distal Intergenic	160702238	160711883	9646	5340	ENST00000366924.6	PLG	-7349
1024	chr18	6203818	6204060	243	Intron (ENST00000400105.6/91133, intron 12 of 19)	6256747	6260934	4188	101927150	ENST00000578427.1	L3MBTL4-AS1	-52687
1025	chr4	165131978	165132752	775	Intron (ENST00000506087.5/201931, intron 2 of 6)	165070608	165112919	42312	201931	ENST00000306480.10	TMEM192	-19059
1026	chr2	122660615	122661106	492	Distal Intergenic	123066151	123073481	7331	107985818	ENST00000432894.1	LINC01826	412375
1027	chr2	18926155	18929332	3178	Distal Intergenic	18986451	19026971	40521	400945	ENST00000424895.1	LINC01376	97639
1028	chr3	142589567	142589809	243	Distal Intergenic	142596387	142713664	117278	5357	ENST00000457734.6	PLS1	-6578
1029	chr8	22126239	22126603	365	Promoter (1-2kb)	22127486	22128116	631	55806	ENST00000519619.1	HR	1513
1030	chr8	93592868	93595917	3050	Intron (ENST00000501400.1/642924, intron 5 of 10)	93698561	93709779	11219	137392	ENST00000523475.5	FAM92A	-102644
1031	chr1	20586484	20594699	8216	Promoter (<=1kb)	20588948	20618908	29961	978	ENST00000375071.3	CDA	0
1032	chr6	166286564	166287809	1246	Distal Intergenic	166305300	166308383	3084	285800	ENST00000322583.4	PRR18	20574
1033	chr8	9473688	9477632	3945	Distal Intergenic	9555914	9710409	154496	8658	ENST00000520408.5	TNKS	-78282
1034	chr11	57612498	57612954	457	Promoter (1-2kb)	57611231	57614529	3299	710	ENST00000530113.1	SERPING1	1267
1035	chr7	38932369	38932746	378	Promoter (<=1kb)	38821218	38932394	111177	27072	ENST00000457055.1	VPS41	0
1036	chr2	234854385	234854749	365	Intron (ENST00000427619.5/ENST00000427619.5, intron 3 of 3)	234951973	235055714	103742	23677	ENST00000392011.6	SH3BP4	-97224
1037	chr15	85017523	85017828	306	Intron (ENST00000310298.8/5151, intron 2 of 22)	84982226	85109130	126905	5151	ENST00000559086.5	PDE8A	35297
1038	chr10	87698078	87698320	243	Intron (ENST00000361175.8/9060, intron 1 of 11)	87660984	87713310	52327	9060	ENST00000482258.1	PAPSS2	37094
1039	chr3	105062747	105063565	819	Distal Intergenic	105366909	105576900	209992	214	ENST00000306107.9	ALCAM	-303344
1040	chr13	93958119	93958523	405	Intron (ENST00000377047.8/10082, intron 3 of 8)	93818424	93836144	17721	100873973	ENST00000445540.1	GPC6-AS2	-121975
1041	chr2	210529912	210533531	3620	Intron (ENST00000417946.5/1373, intron 2 of 4)	210556538	210679107	122570	1373	ENST00000233072.9	CPS1	-23007
1042	chr1	146136129	146136826	698	5' UTR	146064699	146144804	80106	100132406	ENST00000583866.8	NBPF10	7978
1043	chr3	71352808	71353121	314	Intron (ENST00000318789.9/27086, intron 4 of 20)	70959225	71359202	399978	27086	ENST00000648710.1	FOXP1	6081
1044	chr1	30674963	30676350	1388	Distal Intergenic	30713767	30716135	2369	4146	ENST00000494561.1	MATN1	39785
1045	chr3	81810395	81810637	243	Distal Intergenic	81489699	81762161	272463	2632	ENST00000429644.6	GBE1	-48234
1046	chr1	169380919	169381222	304	Intron (ENST00000367808.7/8548, intron 5 of 6)	169368237	169380562	12326	8548	ENST00000426663.1	BLZF1	12682
1047	chr19	41009582	41009954	373	Promoter (<=1kb)	41009677	41017847	8171	1555	ENST00000597612.1	CYP2B6	0
1048	chr15	60450436	60450678	243	Promoter (1-2kb)	60447491	60448951	1461	79664	ENST00000561144.1	ICE2	-1485
1049	chr14	94279786	94280028	243	Downstream (<1kb)	94283355	94290648	7294	51156	ENST00000554173.1	SERPINA10	10620
1050	chr10	68139187	68140297	1111	Intron (ENST00000540630.5/84665, intron 3 of 20)	68109496	68162166	52671	84665	ENST00000373675.3	MYPN	29691
1051	chr5	6708916	6709158	243	Promoter (1-2kb)	6686325	6707711	21387	100505625	ENST00000503989.1	LINC02102	-1205
1052	chr8	33351664	33355265	3602	Distal Intergenic	33371829	33377556	5728	84750	ENST00000519440.5	FUT10	22291
1053	chr3	146224200	146224518	319	Promoter (1-2kb)	146200009	146222433	22425	57088	ENST00000481701.5	PLSCR4	-1767
1054	chr15	37884942	37885501	560	Distal Intergenic	37921939	37936918	14980	145942	ENST00000560841.5	TMCO5A	-36438
1055	chr10	67288072	67290315	2244	Intron (ENST00000433211.6/29119, intron 5 of 17)	67176901	67219873	42973	29119	ENST00000545309.2	CTNNA3	-68199
1056	chr20	57399915	57400157	243	3' UTR	57384160	57393062	8903	100291105	ENST00000417346.1	LOC100291105	-6853
1057	chr2	118176907	118177670	764	Intron (ENST00000414886.5/100506797, intron 2 of 3)	118150290	118186256	35967	100506797	ENST00000648779.1	THORLNC	8586
1058	chr2	233610893	233612058	1166	Distal Intergenic	233617645	233773310	155666	54576	ENST00000373450.4	UGT1A8	-5587
1059	chr7	96244448	96245476	1029	Intron (ENST00000265631.9/10165, intron 3 of 17)	96219662	96219756	95	693176	ENST00000385290.1	MIR591	-24692
1060	chr16	89214727	89214969	243	Promoter (2-3kb)	89217703	89229557	11855	197320	ENST00000433976.6	ZNF778	-2734
1061	chr7	28300575	28302334	1760	Promoter (1-2kb)	28299321	28820000	520680	9586	ENST00000396299.6	CREB5	1254
1062	chr2	224884882	224885453	572	Promoter (<=1kb)	224874700	224886254	11555	55619	ENST00000543715.1	DOCK10	801
1063	chr10	66378991	66379306	316	Exon (ENST00000433211.6/29119, exon 12 of 18)	65920111	66079103	158993	29119	ENST00000373735.1	CTNNA3	-299888
1064	chr13	31949238	31949717	480	Intron (ENST00000645780.1/10129, intron 2 of 61)	31946087	31991931	45845	196549	ENST00000643293.1	EEF1DP3	3151
1065	chr3	45602944	45614584	11641	Exon (ENST00000465039.5/8994, exon 2 of 8)	45594859	45686338	91480	8994	ENST00000273317.4	LIMD1	8085
1066	chr1	244060510	244061732	1223	Distal Intergenic	244051283	244057476	6194	10472	ENST00000358704.4	ZBTB18	9227
1067	chr4	99211477	99211790	314	Promoter (1-2kb)	99208408	99210291	1884	130	ENST00000504257.1	ADH6	-1186
1068	chr7	95341999	95342515	517	Distal Intergenic	95297676	95324707	27032	5444	ENST00000222381.7	PON1	-17292
1069	chr1	222028987	222029229	243	Distal Intergenic	221913648	221978523	64876	105372950	ENST00000412445.1	LINC02257	-50464
1070	chr5	67372121	67372830	710	Distal Intergenic	67179613	67196799	17187	4064	ENST00000256447.5	CD180	-175322
1071	chr4	16193487	16193870	384	Promoter (2-3kb)	16163296	16191484	28189	202018	ENST00000513782.1	TAPT1	-2003
1072	chr1	61231575	61232523	949	Intron (ENST00000371191.5/4774, intron 2 of 10)	61248998	61253484	4487	645030	ENST00000630199.2	NFIA-AS1	20961
1073	chr4	3451269	3452814	1546	Distal Intergenic	3445900	3448194	2295	3083	ENST00000506132.1	HGFAC	5369
1074	chr13	50273390	50273632	243	Intron (ENST00000486895.5/10301, intron 1 of 1)	50293422	50415202	121781	10301	ENST00000469127.5	DLEU1	-19790
1075	chr14	59444512	59444946	435	Intron (ENST00000481661.1/ENST00000481661.1, intron 6 of 6)	59460765	59465342	4578	64582	ENST00000395116.1	GPR135	20396
1076	chr22	35944817	35945139	323	Intron (ENST00000438146.6/23543, intron 1 of 13)	35743983	35938897	194915	23543	ENST00000359369.8	RBFOX2	-5920
1077	chr21	44438636	44438878	243	Intron (ENST00000300482.9/7226, intron 30 of 32)	44425556	44441874	16319	7226	ENST00000490982.1	TRPM2	13080
1078	chr20	14054280	14055048	769	Intron (ENST00000217246.8/140733, intron 2 of 16)	13913862	13996443	82582	80343	ENST00000473203.1	SEL1L2	-57837
1079	chr16	18595703	18595945	243	Intron (ENST00000546162.6/653190, intron 10 of 10)	18571276	18592716	21441	653190	ENST00000565566.1	ABCC6P1	24427
1080	chr10	91521323	91522100	778	Distal Intergenic	91484108	91514829	30722	143279	ENST00000371667.1	HECTD2	37215
1081	chr3	11012172	11012486	315	Promoter (<=1kb)	11011659	11039192	27534	6529	ENST00000643396.1	SLC6A1	513
1082	chr11	77595088	77596501	1414	Intron (ENST00000528638.1/282679, intron 2 of 3)	77589635	77610355	20721	282679	ENST00000313578.3	AQP11	5453
1083	chr7	11231928	11232516	589	Intron (ENST00000625468.2/ENST00000625468.2, intron 3 of 4)	11110981	11169623	58643	9678	ENST00000473050.1	PHF14	120947
1084	chr2	87639400	87640229	830	Intron (ENST00000643276.1/112597, intron 3 of 17)	87629755	87629834	80	100616499	ENST00000582552.1	MIR4435-1	9645
1085	chr2	200271875	200272418	544	Distal Intergenic	200305881	200419333	113453	26010	ENST00000439084.5	SPATS2L	-33463
1086	chr1	213670177	213670419	243	Distal Intergenic	213832591	213841041	8451	100505832	ENST00000609394.5	PROX1-AS1	170622
1087	chr11	127648002	127653007	5006	Distal Intergenic	127271062	127337033	65972	101929497	ENST00000608214.1	LOC101929497	376940
1088	chr17	81087136	81087629	494	Promoter (<=1kb)	81087492	81103596	16105	10458	ENST00000574027.5	BAIAP2	0
1089	chr1	7790837	7791162	326	Intron (ENST00000377541.5/8863, intron 5 of 9)	7785523	7788338	2816	8863	ENST00000473653.1	PER3	5314
1090	chr18	708652	708894	243	Promoter (1-2kb)	688574	706789	18216	55556	ENST00000579053.5	ENOSF1	-1863
1091	chr3	190815436	190815678	243	Distal Intergenic	190852877	190858060	5184	647309	ENST00000495042.1	GMNC	42382
1092	chr21	44815893	44816197	305	Promoter (1-2kb)	44808271	44817968	9698	6612	ENST00000397893.3	SUMO3	1771
1093	chr13	100237963	100238317	355	Intron (ENST00000376279.7/5095, intron 8 of 22)	100293224	100425731	132508	5095	ENST00000424527.5	PCCA	-54907
1094	chr7	51367993	51368399	407	Distal Intergenic	51064399	51316818	252420	23242	ENST00000395540.6	COBL	-51175
1095	chr3	16986555	16988235	1681	Intron (ENST00000460467.1/23228, intron 1 of 2)	17010494	17081546	71053	23228	ENST00000419842.1	PLCL2	-22259
1096	chr11	26725662	26726999	1338	Promoter (2-3kb)	26670813	26723427	52615	159963	ENST00000527405.5	SLC5A12	-2235
1097	chr18	35062238	35063414	1177	Intron (ENST00000591734.5/10982, intron 2 of 5)	35041650	35143470	101821	10982	ENST00000589699.1	MAPRE2	20588
1098	chr3	123044359	123046387	2029	Distal Intergenic	122909194	123028605	119412	54437	ENST00000475244.5	SEMA5B	-15754
1099	chr18	13551959	13553094	1136	Intron (ENST00000587905.5/753, intron 4 of 4)	13542292	13645205	102914	753	ENST00000586207.5	LDLRAD4	9667
1100	chr2	122590074	122590316	243	Distal Intergenic	123066151	123073481	7331	107985818	ENST00000432894.1	LINC01826	483165
1101	chr9	94550754	94551124	371	Distal Intergenic	94555054	94603990	48937	101928099	ENST00000647389.1	PCAT7	-3930
1102	chr11	130868664	130868906	243	Promoter (1-2kb)	130866254	130870247	3994	103611081	ENST00000525716.2	LOC103611081	1341
1103	chr10	29360674	29361126	453	Distal Intergenic	29409402	29458400	48999	102724316	ENST00000430295.5	SVIL-AS1	-48276
1104	chr1	206082019	206082509	491	Promoter (1-2kb)	206083563	206102007	18445	440712	ENST00000603378.5	RHEX	-1054
1105	chr1	96559223	96561273	2051	Distal Intergenic	96721665	96813711	92047	58155	ENST00000482253.5	PTBP2	-160392
1106	chr11	13343595	13343837	243	Intron (ENST00000529050.5/406, intron 2 of 2)	13349945	13354631	4687	406	ENST00000485918.2	ARNTL	-6108
1107	chr17	35998721	35999084	364	Promoter (<=1kb)	35996440	35998370	1931	6359	ENST00000614368.1	CCL15	-351
1108	chrX	56944407	56947581	3175	Intron (ENST00000640101.1/169981, intron 4 of 7)	56977479	56980463	2985	169981	ENST00000639791.1	SPIN3	32882
1109	chr4	170067694	170070003	2310	Exon (ENST00000337664.8/51166, exon 7 of 13)	170070477	170088430	17954	51166	ENST00000505906.1	AADAT	18427
1110	chr6	138650318	138650560	243	Exon (ENST00000405630.1/ENST00000405630.1, exon 1 of 1)	138692548	138697288	4741	441172	ENST00000432673.1	FLJ46906	-41988
1111	chr13	45997785	45998027	243	Intron (ENST00000242848.8/23091, intron 8 of 18)	46001163	46011555	10393	23091	ENST00000470308.1	ZC3H13	13528
1112	chr6	30674798	30675040	243	Promoter (1-2kb)	30653119	30673037	19919	8449	ENST00000376442.7	DHX16	-1761
1113	chr10	113931065	113942661	11597	Distal Intergenic	113854824	113858852	4029	374354	ENST00000468890.1	NHLRC2	76241
1114	chr1	59930685	59931544	860	Distal Intergenic	59893308	59926790	33483	1573	ENST00000371204.3	CYP2J2	-3895
1115	chr14	73523848	73524090	243	Intron (ENST00000555972.2/ENST00000555972.2, intron 1 of 1)	73523036	73531197	8162	399671	ENST00000557603.1	HEATR4	7107
1116	chr11	17683801	17684496	696	Distal Intergenic	17695267	17696940	1674	102723330	ENST00000529781.1	LOC102723330	12444
1117	chr5	79035206	79035448	243	Intron (ENST00000255189.7/29958, intron 7 of 15)	79026436	79030608	4173	29958	ENST00000523201.1	DMGDH	-4598
1118	chr3	100374065	100374914	850	Promoter (<=1kb)	100372006	100373725	1720	9868	ENST00000483945.1	TOMM70	-340
1119	chr15	91495598	91497960	2363	Intron (ENST00000555947.5/101926928, intron 2 of 2)	91463337	91494850	31514	101926928	ENST00000554333.1	CRAT37	32261
1120	chr13	112571992	112573095	1104	Intron (ENST00000261965.7/10426, intron 1 of 21)	112558196	112587346	29151	10426	ENST00000483532.1	TUBGCP3	14251
1121	chr18	31879027	31879269	243	Intron (ENST00000283351.8/22878, intron 12 of 28)	31870014	31871023	1010	22878	ENST00000578252.1	TRAPPC8	-8004
1122	chr16	28121214	28121665	452	Intron (ENST00000565698.5/23214, intron 15 of 24)	28107529	28112958	5430	23214	ENST00000569216.2	XPO6	-8256
1123	chr4	3406491	3411027	4537	Promoter (<=1kb)	3407355	3414224	6870	6002	ENST00000643191.1	RGS12	0
1124	chr2	23240789	23241031	243	Distal Intergenic	23385217	23708606	323390	114818	ENST00000486442.5	KLHL29	-144186
1125	chr7	150332247	150332600	354	Promoter (2-3kb)	150329789	150332721	2933	113763	ENST00000343855.5	ZBED6CL	2458
1126	chr1	20595212	20595762	551	Intron (ENST00000375071.3/978, intron 1 of 3)	20589086	20618903	29818	978	ENST00000461985.1	CDA	6126
1127	chr11	121506609	121506943	335	Intron (ENST00000260197.11/6653, intron 6 of 47)	121555042	121558837	3796	6653	ENST00000529445.1	SORL1	-48099
1128	chr2	234000267	234001289	1023	Intron (ENST00000324695.8/79054, intron 22 of 25)	234013225	234014687	1463	79054	ENST00000466594.1	TRPM8	-11936
1129	chr1	32863738	32866897	3160	Promoter (<=1kb)	32862268	32864717	2450	252995	ENST00000481487.1	FNDC5	0
1130	chr2	53498551	53499327	777	Distal Intergenic	53670606	53694562	23957	100302652	ENST00000470707.1	GPR75-ASB3	195235
1131	chr4	183631197	183632773	1577	Distal Intergenic	183651280	183656096	4817	201965	ENST00000506467.1	RWDD4	23323
1132	chr5	14866371	14866613	243	Intron (ENST00000284268.7/56172, intron 1 of 11)	14768616	14871472	102857	56172	ENST00000513115.1	ANKH	4859
1133	chr1	56934939	56935245	307	Promoter (1-2kb)	56931594	56933381	1788	732	ENST00000465658.1	C8B	-1558
1134	chr18	48571802	48578554	6753	Intron (ENST00000256413.7/9811, intron 1 of 11)	48540095	48663812	123718	9811	ENST00000588345.1	CTIF	31707
1135	chr9	101203144	101203621	478	Intron (ENST00000374874.7/54886, intron 2 of 7)	101185035	101325131	140097	54886	ENST00000395056.2	PLPPR1	18109
1136	chr2	216593377	216593619	243	Intron (ENST00000449783.1/101928232, intron 3 of 3)	216590426	216606938	16513	101928232	ENST00000449783.1	LINC01280	13319
1137	chr22	32515042	32515418	377	Intron (ENST00000358763.6/8224, intron 13 of 13)	32513675	32519686	6012	8224	ENST00000467095.5	SYN3	4268
1138	chr16	51233197	51233439	243	Intron (ENST00000642450.1/ENST00000642450.1, intron 2 of 3)	51143204	51151367	8164	6299	ENST00000562674.1	SALL1	-81830
1139	chr10	12051479	12052269	791	Distal Intergenic	12035059	12043170	8112	26019	ENST00000460569.1	UPF2	-8309
1140	chr12	56958595	56959371	777	Promoter (<=1kb)	56951438	56959374	7937	8608	ENST00000360752.4	RDH16	3
1141	chr16	11531766	11537687	5922	Distal Intergenic	11549360	11556444	7085	9516	ENST00000575426.1	LITAF	18757
1142	chr4	127982429	127982736	308	Intron (ENST00000398965.5/80167, intron 1 of 10)	127917889	127966034	48146	256471	ENST00000641178.1	MFSD8	-16395
1143	chr6	162626314	162626829	516	Intron (ENST00000366898.5/5071, intron 1 of 11)	162443310	162529787	86478	5071	ENST00000648830.1	PRKN	-96527
1144	chr11	108698367	108699994	1628	Intron (ENST00000322536.7/1662, intron 9 of 17)	108665122	108922243	257122	1662	ENST00000526794.1	DDX10	33245
1145	chr2	132702179	132702491	313	Intron (ENST00000640590.1/344148, intron 2 of 2)	132671799	132732051	60253	344148	ENST00000640590.1	NCKAP5	29560
1146	chr2	64977170	64977412	243	Distal Intergenic	64988477	65016554	28078	6509	ENST00000493121.5	SLC1A4	-11065
1147	chr4	15558700	15559088	389	Intron (ENST00000424120.5/57545, intron 21 of 36)	15550738	15557373	6636	57545	ENST00000512202.1	CC2D2A	7962
1148	chr21	38327416	38327726	311	Intron (ENST00000414189.5/102724678, intron 3 of 4)	38323635	38333364	9730	102724678	ENST00000414189.5	LINC01423	5638
1149	chr15	40387913	40388216	304	Promoter (1-2kb)	40389808	40392000	2193	90417	ENST00000561367.1	KNSTRN	-1592
1150	chr13	101781928	101782316	389	Intron (ENST00000376131.8/2259, intron 3 of 4)	101868372	101875294	6923	2259	ENST00000468052.1	FGF14	92978
1151	chr9	134272544	134273277	734	Distal Intergenic	134293931	134295397	1467	105376310	ENST00000417135.1	LINC02247	22120
1152	chr6	10719939	10721319	1381	Promoter (1-2kb)	10722915	10731119	8205	51522	ENST00000541412.5	TMEM14C	-1596
1153	chr20	44214046	44214501	456	Promoter (<=1kb)	44214898	44225071	10174	100505783	ENST00000623343.1	OSER1-DT	-397
1154	chr6	56603792	56604034	243	Exon (ENST00000361203.7/667, exon 36 of 98)	56572100	56598513	26414	667	ENST00000518398.1	DST	-5279
1155	chr3	142966913	142967360	448	Promoter (2-3kb)	142964582	142969769	5188	101927832	ENST00000625677.1	PAQR9-AS1	2331
1156	chr1	32872870	32873112	243	Promoter (<=1kb)	32870874	32872482	1609	252995	ENST00000465346.1	FNDC5	-388
1157	chr17	39715915	39717129	1215	Promoter (<=1kb)	39716551	39723950	7400	2064	ENST00000582818.5	ERBB2	0
1158	chr10	4893688	4894787	1100	Promoter (1-2kb)	4871901	4891975	20075	389932	ENST00000432950.1	AKR1C6P	-1713
1159	chr11	115376369	115376865	497	Intron (ENST00000535704.1/ENST00000535704.1, intron 1 of 1)	115396756	115397658	903	105369507	ENST00000543182.1	LOC105369507	-19891
1160	chr8	64575404	64576507	1104	Promoter (<=1kb)	64574306	64577263	2958	401463	ENST00000520834.1	LOC401463	756
1161	chr7	63925232	63927460	2229	Exon (ENST00000419937.1/ENST00000419937.1, exon 1 of 2)	63998874	64016130	17257	100419780	ENST00000330020.4	ZNF722P	-71414
1162	chr1	230670137	230670379	243	Exon (ENST00000494371.5/22796, exon 8 of 10)	230684323	230688528	4206	22796	ENST00000482012.1	COG2	-13944
1163	chr7	96235441	96235744	304	Intron (ENST00000265631.9/10165, intron 3 of 17)	96219662	96219756	95	693176	ENST00000385290.1	MIR591	-15685
1164	chr4	155773886	155774441	556	Intron (ENST00000505154.5/2983, intron 1 of 12)	155759459	155806824	47366	2983	ENST00000513437.1	GUCY1B1	14427
1165	chr11	115565681	115566572	892	Distal Intergenic	115229220	115504957	275738	23705	ENST00000543249.1	CADM1	-60724
1166	chr2	133193099	133202628	9530	Intron (ENST00000409261.5/344148, intron 5 of 19)	133264968	133269010	4043	101928161	ENST00000454699.5	NCKAP5-AS2	-62340
1167	chr15	51024424	51025247	824	Distal Intergenic	51037488	51293912	256425	109729174	ENST00000559909.1	MIR4713HG	-12241
1168	chr6	139907567	139907996	430	Distal Intergenic	139854919	139860151	5233	100132735	ENST00000431609.1	FILNC1	52648
1169	chr3	69254008	69255067	1060	Intron (ENST00000398540.7/23150, intron 5 of 22)	69198726	69250248	51523	23150	ENST00000487751.1	FRMD4B	-3760
1170	chr4	113066835	113067902	1068	Intron (ENST00000503271.5/287, intron 2 of 30)	113049729	113381471	331743	287	ENST00000264366.10	ANK2	17106
1171	chr8	58429388	58429630	243	Intron (ENST00000399598.6/137886, intron 2 of 7)	58416930	58435106	18177	137886	ENST00000521796.1	UBXN2B	12458
1172	chr6	169904119	169906333	2215	Distal Intergenic	169794244	169799549	5306	401288	ENST00000648769.1	LINC00242	-104570
1173	chr15	62294836	62295827	992	Distal Intergenic	62304658	62304734	77	102465869	ENST00000618843.1	MIR8067	8907
1174	chr10	95176166	95176927	762	Distal Intergenic	95194200	95226405	32206	142827	ENST00000327739.7	ACSM6	-17273
1175	chr8	128517616	128517858	243	Intron (ENST00000520766.5/101927774, intron 1 of 5)	128420712	128561126	140415	101927774	ENST00000520766.5	LINC00824	43268
1176	chr15	60664040	60664607	568	Intron (ENST00000335670.10/6095, intron 2 of 10)	60681569	60686888	5320	100996876	ENST00000558104.1	RORA-AS2	-16962
1177	chr18	77137834	77138777	944	Distal Intergenic	77017119	77133683	116565	4155	ENST00000497479.1	MBP	-4151
1178	chr12	51056562	51056939	378	Promoter (<=1kb)	51056371	51059649	3279	25875	ENST00000549395.1	LETMD1	191
1179	chr1	81880690	81881070	381	Intron (ENST00000370721.5/23266, intron 5 of 24)	81942969	81991368	48400	23266	ENST00000449420.5	ADGRL2	-61899
1180	chr4	14934332	14935332	1001	Intron (ENST00000500394.6/441009, intron 7 of 7)	14470465	14888169	417705	201853	ENST00000505089.6	LINC00504	-46163
1181	chr14	50446355	50449452	3098	Promoter (1-2kb)	50418501	50450600	32100	11183	ENST00000554990.5	MAP4K5	1148
1182	chr8	69725131	69726787	1657	Intron (ENST00000260126.8/81796, intron 5 of 9)	69638811	69641147	2337	23213	ENST00000526654.1	SULF1	86320
1183	chr13	94117961	94118203	243	Intron (ENST00000377047.8/10082, intron 4 of 8)	94154193	94187991	33799	100873972	ENST00000436329.2	GPC6-AS1	69788
1184	chr4	88705238	88707120	1883	Promoter (2-3kb)	88709789	88730103	20315	285512	ENST00000500765.1	FAM13A-AS1	-2669
1185	chr12	100252772	100253374	603	Promoter (<=1kb)	100241735	100252305	10571	120863	ENST00000547823.1	DEPDC4	-467
1186	chr1	229311099	229311584	486	Distal Intergenic	229304857	229305504	648	10638	ENST00000366688.4	SPHAR	6242
1187	chr5	5473591	5474104	514	Exon (ENST00000296564.8/23379, exon 16 of 19)	5422742	5437836	15095	23379	ENST00000505464.1	ICE1	50849
1188	chr9	14265921	14266163	243	Intron (ENST00000380959.7/4781, intron 2 of 8)	14087674	14300231	212558	4781	ENST00000636735.1	NFIB	34068
1189	chr5	91036117	91036420	304	Intron (ENST00000645211.1/84059, intron 85 of 89)	91091615	91164207	72593	84059	ENST00000640256.1	ADGRV1	-55195
1190	chr10	63772987	63775170	2184	Intron (ENST00000444770.1/ENST00000444770.1, intron 2 of 2)	63598046	63620822	22777	221035	ENST00000634963.1	REEP3	174941
1191	chr1	86937584	86939595	2012	Intron (ENST00000370551.8/9653, intron 1 of 4)	86956484	87092588	136105	9653	ENST00000591456.1	HS2ST1	-16889
1192	chr7	87576983	87577225	243	Intron (ENST00000622132.4/5243, intron 4 of 27)	87503633	87601073	97441	5243	ENST00000622132.4	ABCB1	23848
1193	chr2	178471704	178472119	416	Intron (ENST00000424785.6/51661, intron 2 of 3)	178467807	178478317	10511	51661	ENST00000412612.1	FKBP7	6198
1194	chr1	23897100	23897737	638	Intron (ENST00000374472.4/1269, intron 1 of 1)	23870526	23913362	42837	1269	ENST00000374472.4	CNR2	15625
1195	chr2	241421806	241422558	753	Intron (ENST00000264042.7/9855, intron 8 of 26)	241410945	241434187	23243	9855	ENST00000485051.1	FARP2	10861
1196	chr3	123700802	123704602	3801	Promoter (<=1kb)	123681030	123701457	20428	4638	ENST00000504946.5	MYLK	0
1197	chr6	51719824	51721099	1276	3' UTR	51621821	51622541	721	101927082	ENST00000587000.2	LOC101927082	98003
1198	chr9	128575561	128575803	243	Intron (ENST00000372731.8/6709, intron 5 of 55)	128580953	128581946	994	6709	ENST00000472211.2	SPTAN1	-5150
1199	chr20	13447545	13447787	243	Intron (ENST00000480436.5/55617, intron 11 of 13)	13614667	13630011	15345	55617	ENST00000434275.1	TASP1	182224
1200	chr10	99307408	99307650	243	Distal Intergenic	99329099	99394330	65232	26507	ENST00000356713.4	CNNM1	-21449
1201	chr8	97117607	97120692	3086	Intron (ENST00000220763.9/10404, intron 7 of 7)	97055527	97092936	37410	10404	ENST00000529551.1	CPQ	62080
1202	chr22	19999055	19999357	303	Intron (ENST00000263207.7/421, intron 2 of 19)	19971228	19990794	19567	421	ENST00000406259.1	ARVCF	-8261
1203	chr1	205642244	205642486	243	Distal Intergenic	205619268	205631962	12695	2005	ENST00000289703.8	ELK4	-10282
1204	chr6	3011616	3011858	243	Intron (ENST00000426637.5/4835, intron 5 of 5)	3004167	3010189	6023	4835	ENST00000606474.1	NQO2	7449
1205	chr13	20579122	20581029	1908	Intron (ENST00000351808.9/8100, intron 2 of 25)	20567166	20583016	15851	8100	ENST00000389373.3	IFT88	11956
1206	chr10	45445363	45445605	243	Promoter (1-2kb)	45443421	45444214	794	240	ENST00000498461.1	ALOX5	1942
1207	chr4	73272746	73273062	317	Intron (ENST00000502790.1/ENST00000502790.1, intron 2 of 4)	73102463	73258798	156336	26057	ENST00000561029.1	ANKRD17	-13948
1208	chr7	151842603	151849712	7110	Intron (ENST00000287878.8/51422, intron 1 of 15)	151837268	151876788	39521	51422	ENST00000474383.1	PRKAG2	27076
1209	chr10	97471531	97471773	243	Promoter (1-2kb)	97465865	97470140	4276	64210	ENST00000434392.5	MMS19	-1391
1210	chr17	19528715	19529092	378	Intron (ENST00000584348.5/55244, intron 1 of 6)	19533462	19577597	44136	55244	ENST00000571335.5	SLC47A1	-4370
1211	chr14	54885007	54885311	305	Exon (ENST00000556903.2/ENST00000556903.2, exon 2 of 2)	54878113	54878193	81	100422984	ENST00000580634.1	MIR4308	-6814
1212	chr2	179645467	179645709	243	Intron (ENST00000410066.6/151126, intron 3 of 9)	179445550	179637326	191777	151126	ENST00000457304.5	ZNF385B	-8141
1213	chr12	115087139	115087381	243	Distal Intergenic	114670254	114684164	13911	6926	ENST00000349155.6	TBX3	-402975
1214	chr17	81990352	81992938	2587	Promoter (2-3kb)	81995443	82017037	21595	79058	ENST00000582355.6	ASPSCR1	-2505
1215	chr1	175145863	175146817	955	Intron (ENST00000239462.8/63923, intron 18 of 18)	175156987	175166741	9755	9674	ENST00000619513.1	KIAA0040	19924
1216	chr4	184881724	184882374	651	Distal Intergenic	184893871	184898764	4894	100506229	ENST00000506479.5	LINC01093	16390
1217	chr16	68891550	68894082	2533	Intron (ENST00000261778.1/79613, intron 7 of 17)	68900238	68907533	7296	79613	ENST00000562491.1	TANGO6	-6156
1218	chr2	172960650	172961576	927	5' UTR	172965141	172967316	2176	11069	ENST00000473182.2	RAPGEF4	-3565
1219	chr15	96381263	96382356	1094	Intron (ENST00000558382.2/ENST00000558382.2, intron 1 of 1)	96333261	96333307	47	100302258	ENST00000410719.1	MIR1469	48002
1220	chr12	42129984	42132337	2354	Intron (ENST00000398675.7/283464, intron 1 of 7)	42087145	42144712	57568	283464	ENST00000280876.6	GXYLT1	12375
1221	chr9	14202747	14214818	12072	Exon (ENST00000435137.1/ENST00000435137.1, exon 1 of 1)	14081843	14180802	98960	4781	ENST00000543693.5	NFIB	-21945
1222	chr3	71427757	71430212	2456	Intron (ENST00000318789.9/27086, intron 3 of 20)	71198210	71391564	193355	27086	ENST00000648944.1	FOXP1	-36193
1223	chr8	132888980	132889298	319	Intron (ENST00000220616.8/7038, intron 10 of 47)	132881872	132883240	1369	7038	ENST00000520769.1	TG	7108
1224	chr2	109220074	109220316	243	Intron (ENST00000309415.7/344558, intron 1 of 9)	109141490	109141588	99	100422863	ENST00000582152.1	MIR4265	-78486
1225	chr21	21283209	21283735	527	Promoter (2-3kb)	21280576	21540195	259620	4685	ENST00000284894.8	NCAM2	2633
1226	chr6	133805629	133806973	1345	Intron (ENST00000607033.5/100507308, intron 2 of 8)	133821147	133851288	30142	154089	ENST00000456347.5	LINC01312	-14174
1227	chr18	6430156	6433261	3106	Distal Intergenic	6244567	6415237	170671	91133	ENST00000581231.5	L3MBTL4	-14919
1228	chr12	24470360	24470758	399	Intron (ENST00000646273.1/6660, intron 1 of 16)	24367935	24562382	194448	6660	ENST00000538905.1	SOX5	91624
1229	chr10	112291744	112291986	243	Intron (ENST00000643850.1/6975, intron 5 of 10)	112299612	112299690	79	102466189	ENST00000615929.1	MIR6715A	-7626
1230	chr5	32709527	32711225	1699	Promoter (<=1kb)	32710637	32791724	81088	4883	ENST00000326958.5	NPR3	0
1231	chr12	24477658	24477900	243	Intron (ENST00000646273.1/6660, intron 1 of 16)	24367935	24562382	194448	6660	ENST00000538905.1	SOX5	84482
1232	chr7	15303562	15303804	243	Intron (ENST00000342526.7/392636, intron 12 of 12)	15306235	15366187	59953	392636	ENST00000407277.6	AGMO	62383
1233	chr4	155958391	155958769	379	Distal Intergenic	155924118	155953917	29800	1519	ENST00000433477.3	CTSO	-4474
1234	chr1	66737356	66737899	544	Intron (ENST00000237247.10/84251, intron 23 of 26)	66752459	66770896	18438	200132	ENST00000525663.5	TCTEX1D1	-14560
1235	chr13	101749697	101750672	976	Intron (ENST00000376131.8/2259, intron 3 of 4)	101868372	101875294	6923	2259	ENST00000468052.1	FGF14	124622
1236	chr11	130101439	130101762	324	Exon (ENST00000532456.5/334, exon 2 of 4)	130108605	130109602	998	334	ENST00000461918.2	APLP2	-6843
1237	chr16	21883553	21883920	368	Promoter (2-3kb)	21857335	21880827	23493	440345	ENST00000538859.1	NPIPB4	-2726
1238	chr10	95355399	95356088	690	Promoter (<=1kb)	95341674	95356046	14373	10580	ENST00000371228.2	SORBS1	0
1239	chr11	128135657	128138489	2833	Intron (ENST00000649115.1/ENST00000649115.1, intron 2 of 8)	128208749	128241433	32685	105369564	ENST00000650607.1	LINC02098	-70260
1240	chr2	43234684	43235134	451	Intron (ENST00000405975.6/63892, intron 36 of 37)	43227210	43228855	1646	100129726	ENST00000623515.2	LINC01126	7474
1241	chr14	51618082	51618803	722	Intron (ENST00000556137.5/122786, intron 3 of 3)	51454512	51599952	145441	100874185	ENST00000556617.5	FRMD6-AS2	-18130
1242	chrX	111695091	111696135	1045	Intron (ENST00000487141.5/79868, intron 4 of 6)	111688727	111709029	20303	79868	ENST00000470704.1	ALG13	6364
1243	chr3	142986232	142988503	2272	Intron (ENST00000497652.5/101927832, intron 2 of 4)	143001168	143056500	55333	23350	ENST00000488497.7	U2SURP	-12665
1244	chr6	163679294	163679536	243	Distal Intergenic	163566458	163571452	4995	9444	ENST00000541696.1	QKI	112836
1245	chr18	50307384	50309312	1929	Intron (ENST00000586227.1/ENST00000586227.1, intron 1 of 1)	50282343	50288304	5962	30827	ENST00000285106.10	CXXC1	-19080
1246	chr8	18183733	18187484	3752	Intron (ENST00000517441.5/9, intron 2 of 4)	18170477	18222754	52278	9	ENST00000517441.5	NAT1	13256
1247	chr15	91549575	91549898	324	Intron (ENST00000555947.5/101926928, intron 2 of 2)	91463337	91494850	31514	101926928	ENST00000554333.1	CRAT37	86238
1248	chr2	237570453	237570695	243	Distal Intergenic	237566574	237567175	602	51052	ENST00000165524.1	PRLH	3879
1249	chr6	25863451	25864562	1112	Intron (ENST00000397060.8/10786, intron 2 of 12)	25850773	25868455	17683	10786	ENST00000449356.2	SLC17A3	3893
1250	chr7	40428678	40428920	243	Intron (ENST00000401647.6/79783, intron 8 of 12)	40274511	40388158	113648	79783	ENST00000488110.1	SUGCT	154167
1251	chr1	118951528	118951861	334	Intron (ENST00000207157.7/6913, intron 1 of 7)	118883047	118988348	105302	6913	ENST00000369429.4	TBX15	36487
1252	chr6	36073272	36073514	243	Promoter (2-3kb)	36075865	36076888	1024	1432	ENST00000490379.1	MAPK14	-2351
1253	chr12	111101814	111102929	1116	Promoter (2-3kb)	111099446	111295346	195901	23316	ENST00000397643.3	CUX2	2368
1254	chr1	18884633	18884875	243	Promoter (<=1kb)	18882560	18885619	3060	8659	ENST00000454547.1	ALDH4A1	744
1255	chr10	33032066	33032308	243	Intron (ENST00000450890.5/ENST00000450890.5, intron 3 of 3)	32929824	33005792	75969	3688	ENST00000475184.5	ITGB1	-26274
1256	chr20	44945908	44946473	566	Intron (ENST00000490798.5/80336, intron 5 of 5)	44937843	44939317	1475	80336	ENST00000482486.1	PABPC1L	8065
1257	chr9	15972786	15973198	413	3' UTR	15887795	15920334	32540	203238	ENST00000472806.1	CCDC171	84991
1258	chr6	53418007	53419258	1252	Exon (ENST00000605855.1/ENST00000605855.1, exon 1 of 1)	53267398	53349179	81782	60481	ENST00000542638.5	ELOVL5	-68828
1259	chr12	9220191	9223765	3575	Distal Intergenic	9228533	9234207	5675	3	ENST00000543404.5	A2MP1	10442
1260	chr1	174975409	174975714	306	Promoter (<=1kb)	174976029	174988807	12779	9910	ENST00000461613.1	RABGAP1L	-315
1261	chr3	32264120	32264362	243	Intron (ENST00000458535.6/152189, intron 1 of 2)	32238679	32370325	131647	152189	ENST00000307526.3	CMTM8	25441
1262	chr5	81344523	81345379	857	Promoter (<=1kb)	81330362	81344203	13842	134526	ENST00000508234.5	ACOT12	-320
1263	chr12	1080628	1080870	243	Promoter (2-3kb)	1083141	1444589	361449	23085	ENST00000538971.6	ERC1	-2271
1264	chr1	209693284	209693526	243	Intron (ENST00000615289.4/3290, intron 1 of 5)	209686269	209734478	48210	3290	ENST00000261465.5	HSD11B1	7015
1265	chr8	85613689	85614368	680	Distal Intergenic	85656442	85663039	6598	100288527	ENST00000379010.3	REXO1L2P	48671
1266	chr10	4974773	4975077	305	Intron (ENST00000477661.1/1645, intron 6 of 7)	4965491	4967048	1558	1645	ENST00000476100.1	AKR1C1	9282
1267	chr14	38389885	38392525	2641	Distal Intergenic	38254103	38256369	2267	161198	ENST00000342213.2	CLEC14A	-133516
1268	chr7	2700715	2701973	1259	Promoter (<=1kb)	2702021	2709189	7169	155185	ENST00000485540.5	AMZ1	-48
1269	chr11	2366712	2371477	4766	Intron (ENST00000427151.1/101927682, intron 1 of 2)	2376177	2395900	19724	975	ENST00000475945.6	CD81	-4700
1270	chr14	89160300	89160542	243	3' UTR	89124871	89180744	55874	1112	ENST00000557572.1	FOXN3	20202
1271	chr1	101428	101731	304	Intron (ENST00000466430.5/ENST00000466430.5, intron 2 of 3)	69055	70108	1054	79501	ENST00000335137.4	OR4F5	32373
1272	chr1	39965536	39966076	541	Promoter (<=1kb)	39966662	39968692	2031	84879	ENST00000491515.5	MFSD2A	-586
1273	chrX	67589660	67589902	243	Intron (ENST00000396044.7/367, intron 1 of 4)	67568889	67724288	155400	367	ENST00000396043.2	AR	20771
1274	chr9	130616312	130616554	243	Exon (ENST00000319725.9/8939, exon 7 of 19)	130620414	130632022	11609	8939	ENST00000487406.2	FUBP3	-3860
1275	chr15	99274997	99276128	1132	Intron (ENST00000558879.5/123355, intron 2 of 2)	99286702	99352457	65756	123355	ENST00000558771.1	LRRC28	-10574
1276	chr6	21553346	21553588	243	Intron (ENST00000637901.1/ENST00000637901.1, intron 1 of 2)	21592768	21598619	5852	6659	ENST00000244745.3	SOX4	-39180
1277	chr5	42826914	42827156	243	Promoter (1-2kb)	42800131	42825896	25766	6414	ENST00000506577.5	SELENOP	-1018
1278	chr14	35116162	35118344	2183	3' UTR	35121846	35123347	1502	9692	ENST00000603611.5	PRORP	-3502
1279	chr12	104925467	104927102	1636	Promoter (1-2kb)	104889033	104928202	39170	84102	ENST00000437220.1	SLC41A2	1100
1280	chr22	23174636	23175802	1167	Distal Intergenic	23179704	23261428	81725	613	ENST00000479188.5	BCR	-3902
1281	chr2	164790091	164790403	313	Intron (ENST00000392717.6/22837, intron 2 of 14)	164722306	164773754	51449	22837	ENST00000452626.5	COBLL1	-16337
1282	chr8	142768968	142772603	3636	Promoter (<=1kb)	142764338	142769844	5507	432355	ENST00000317543.11	SLURP2	0
1283	chr19	44974132	44976071	1940	Promoter (<=1kb)	44974547	44986936	12390	1209	ENST00000587537.5	CLPTM1	0
1284	chr16	19203322	19204507	1186	Intron (ENST00000355377.6/51760, intron 5 of 7)	19211157	19267118	55962	51760	ENST00000568433.1	SYT17	-6650
1285	chr10	116187701	116187943	243	Intron (ENST00000369236.5/2674, intron 3 of 8)	116056925	116272282	215358	2674	ENST00000369236.5	GFRA1	84339
1286	chr8	122303148	122304754	1607	Distal Intergenic	122414332	122428551	14220	105375734	ENST00000533992.1	SMILR	123797
1287	chr14	21083613	21086155	2543	Promoter (1-2kb)	21087753	21089414	1662	55701	ENST00000557498.1	ARHGEF40	-1598
1288	chr6	47450231	47451128	898	Distal Intergenic	47477789	47627263	149475	23607	ENST00000359314.5	CD2AP	-26661
1289	chr21	44886187	44886429	243	Promoter (2-3kb)	44886333	44889131	2799	3689	ENST00000479202.5	ITGB2	2702
1290	chr13	100362123	100362758	636	Intron (ENST00000376279.7/5095, intron 18 of 22)	100368472	100530432	161961	5095	ENST00000458283.5	PCCA	-5714
1291	chr15	42707416	42708564	1149	Intron (ENST00000290607.11/57519, intron 26 of 32)	42724895	42725539	645	146059	ENST00000565930.1	CDAN1	16975
1292	chr9	113184722	113185519	798	Exon (ENST00000446284.5/23307, exon 16 of 28)	113184292	113188561	4270	23307	ENST00000489645.1	FKBP15	3042
1293	chr1	162230950	162231263	314	Intron (ENST00000530878.5/9722, intron 2 of 9)	162157107	162157182	76	100616386	ENST00000577581.1	MIR4654	73843
1294	chr17	71162708	71164820	2113	Intron (ENST00000569074.1/101928165, intron 2 of 3)	71097775	71202177	104403	101928165	ENST00000569074.1	CASC17	37357
1295	chr22	28993781	28994023	243	Intron (ENST00000544604.6/84133, intron 2 of 8)	28987052	29053965	66914	84133	ENST00000406323.3	ZNRF3	6729
1296	chr9	22079334	22080713	1380	Intron (ENST00000585267.5/100048912, intron 3 of 8)	22112071	22120713	8643	100048912	ENST00000645223.1	CDKN2B-AS1	-31358
1297	chr1	58456338	58457879	1542	Intron (ENST00000485760.5/1600, intron 3 of 20)	58462552	58506199	43648	115209	ENST00000460671.1	OMA1	48320
1298	chr1	1524869	1525514	646	Promoter (<=1kb)	1524273	1529331	5059	55210	ENST00000400830.3	ATAD3A	596
1299	chr9	69076774	69077562	789	3' UTR	69036161	69073105	36945	2395	ENST00000498653.5	FXN	40613
1300	chr1	111770410	111770652	243	Downstream (<1kb)	111762417	111765830	3414	11218	ENST00000534200.1	DDX20	7993
1301	chr4	104911358	104911661	304	Intron (ENST00000506148.5/ENST00000506148.5, intron 1 of 3)	105145875	105242771	96897	54790	ENST00000305737.6	TET2	-234214
1302	chr12	61914518	61915059	542	Intron (ENST00000416284.7/338811, intron 1 of 4)	61708277	61827233	118957	338811	ENST00000550003.1	TAFA2	-87285
1303	chr10	59018139	59020293	2155	Distal Intergenic	58999626	59001543	1918	100507008	ENST00000432535.1	LINC00844	18513
1304	chr8	55944471	55947364	2894	Exon (ENST00000519728.5/4067, exon 3 of 13)	55940234	55950748	10515	4067	ENST00000520050.1	LYN	4237
1305	chr11	115611261	115614087	2827	Distal Intergenic	115229220	115504957	275738	23705	ENST00000543249.1	CADM1	-106304
1306	chr4	48538598	48539466	869	Promoter (1-2kb)	48531301	48540535	9235	285527	ENST00000512297.1	FRYL	1069
1307	chr2	154615272	154615764	493	Distal Intergenic	154698299	154858351	160053	3760	ENST00000295101.2	KCNJ3	-82535
1308	chr3	179729516	179730212	697	Exon (ENST00000263966.7/8975, exon 9 of 21)	179721564	179761151	39588	8975	ENST00000497155.1	USP13	7952
1309	chr9	133719290	133720112	823	Intron (ENST00000371872.8/1757, intron 6 of 20)	133663564	133730163	66600	1757	ENST00000422262.6	SARDH	10051
1310	chr3	114865916	114869050	3135	Intron (ENST00000357258.8/26137, intron 3 of 9)	114873114	114876514	3401	104413890	ENST00000498630.1	ZBTB20-AS3	-4064
1311	chr1	27755467	27755911	445	Intron (ENST00000373954.10/199870, intron 7 of 8)	27744774	27760185	15412	199870	ENST00000446647.1	FAM76A	10693
1312	chr9	35581205	35582337	1133	Distal Intergenic	35561949	35563899	1951	730112	ENST00000447837.1	FAM166B	-17306
1313	chr2	51335420	51335662	243	Intron (ENST00000440698.1/730100, intron 3 of 10)	51028374	51082864	54491	9378	ENST00000635310.1	NRXN1	-252556
1314	chr9	134417778	134419722	1945	Intron (ENST00000481739.1/6256, intron 5 of 9)	134386122	134401882	15761	6256	ENST00000649020.1	RXRA	31656
1315	chr10	76394187	76394429	243	Promoter (2-3kb)	76396501	76557326	160826	83938	ENST00000468134.1	LRMDA	-2072
1316	chr4	156831513	156831755	243	Intron (ENST00000502773.5/56034, intron 2 of 5)	156762948	156850272	87325	56034	ENST00000506880.5	PDGFC	18517
1317	chr1	61392111	61392353	243	Intron (ENST00000371191.5/4774, intron 7 of 10)	61404076	61458037	53962	4774	ENST00000357977.5	NFIA	-11723
1318	chr17	55746817	55747476	660	Distal Intergenic	55750979	55777374	26396	58488	ENST00000268896.9	PCTP	-3503
1319	chr16	18520750	18520992	243	3' UTR	18520820	18529547	8728	283820	ENST00000567831.5	NOMO2	8555
1320	chr3	43043929	43044171	243	Intron (ENST00000443313.5/100506243, intron 4 of 5)	43079232	43105939	26708	84892	ENST00000441964.1	POMGNT2	61768
1321	chr16	83960222	83960554	333	Intron (ENST00000361711.7/29948, intron 3 of 5)	83956988	83960732	3745	29948	ENST00000567707.1	OSGIN1	3234
1322	chr17	50784984	50785554	571	Intron (ENST00000648357.1/ENST00000648357.1, intron 1 of 1)	50768650	50768730	81	102466918	ENST00000620427.1	MIR8059	16334
1323	chr1	120455109	120455351	243	Intron (ENST00000583271.5/728841, intron 15 of 24)	120436353	120467739	31387	728841	ENST00000583271.5	NBPF8	18756
1324	chr3	144229745	144230461	717	Distal Intergenic	143973608	143992367	18760	205428	ENST00000441925.2	DIPK2A	256137
1325	chr4	99753093	99753797	705	Distal Intergenic	99816833	99870154	53322	27071	ENST00000296414.11	DAPP1	-63036
1326	chr10	88240270	88240512	243	Distal Intergenic	87952199	87961309	9111	5728	ENST00000472832.2	PTEN	288071
1327	chr4	40624623	40624865	243	Intron (ENST00000510871.5/54502, intron 1 of 6)	40542523	40629529	87007	54502	ENST00000513044.1	RBM47	4664
1328	chr11	66848316	66848689	374	Promoter (<=1kb)	66848899	66849271	373	5091	ENST00000529352.1	PC	582
1329	chr5	82074707	82075323	617	Intron (ENST00000355178.8/83734, intron 3 of 3)	82111392	82276297	164906	83734	ENST00000508814.5	ATG10	-36069
1330	chr18	63975658	63976037	380	Intron (ENST00000481726.1/5271, intron 3 of 5)	63979808	63987396	7589	5271	ENST00000295211.5	SERPINB8	-3771
1331	chr2	33133517	33135167	1651	Promoter (<=1kb)	33134406	33188676	54271	4052	ENST00000432635.1	LTBP1	0
1332	chr5	115731184	115732614	1431	Distal Intergenic	115813182	115814481	1300	1036	ENST00000504877.1	CDO1	81867
1333	chr9	4921144	4921386	243	Distal Intergenic	4984390	5078444	94055	3717	ENST00000636127.1	JAK2	-63004
1334	chr1	243490745	243491063	319	Promoter (2-3kb)	243487815	243500089	12275	10806	ENST00000497459.1	SDCCAG8	2930
1335	chr18	62850005	62851886	1882	Intron (ENST00000262719.9/23239, intron 3 of 16)	62832174	62895088	62915	23239	ENST00000487409.1	PHLPP1	17831
1336	chr1	59519710	59520081	372	Intron (ENST00000634606.1/55277, intron 6 of 16)	59512316	59660423	148108	55277	ENST00000485720.1	FGGY	7394
1337	chr9	121030767	121031087	321	Intron (ENST00000223642.2/727, intron 6 of 40)	121025696	121034826	9131	727	ENST00000460578.1	C5	3739
1338	chr1	119285930	119287368	1439	Intron (ENST00000457719.1/ENST00000457719.1, intron 2 of 2)	119328176	119330815	2640	105378934	ENST00000420059.5	LINC01780	-40808
1339	chr17	69108886	69109128	243	Exon (ENST00000590311.5/23460, exon 3 of 5)	69103912	69115442	11531	23460	ENST00000590311.5	ABCA6	6314
1340	chr12	26745581	26746120	540	Intron (ENST00000381340.7/3709, intron 2 of 56)	26722438	26726013	3576	3709	ENST00000536627.1	ITPR2	-19568
1341	chr10	113970016	113970258	243	Distal Intergenic	114044056	114046908	2853	153	ENST00000369295.3	ADRB1	-73798
1342	chr2	111227077	111228257	1181	Intron (ENST00000645030.1/541471, intron 3 of 3)	111321013	111321086	74	100616341	ENST00000580915.2	MIR4435-2	92829
1343	chr14	94366037	94366494	458	Promoter (<=1kb)	94364313	94366698	2386	390502	ENST00000553483.3	SERPINA2	204
1344	chr2	121359266	121366379	7114	Exon (ENST00000646274.1/23332, exon 35 of 39)	121364119	121388076	23958	23332	ENST00000472776.1	CLASP1	21697
1345	chr5	134910738	134911837	1100	Promoter (1-2kb)	134908830	134959095	50266	84105	ENST00000510013.1	PCBD2	1908
1346	chr2	127666635	127666940	306	Promoter (2-3kb)	127638426	127664546	26121	55679	ENST00000324938.9	LIMS2	-2089
1347	chr1	120018552	120018794	243	Intron (ENST00000256646.6/4853, intron 2 of 33)	120005233	120029963	24731	4853	ENST00000489731.1	NOTCH2	11169
1348	chr9	109881431	109886098	4668	Intron (ENST00000374531.6/114299, intron 4 of 6)	109867271	109923849	56579	445815	ENST00000465091.1	PALM2-AKAP2	14160
1349	chr6	11932757	11937698	4942	Distal Intergenic	11990343	11992012	1670	101928253	ENST00000456036.1	LOC101928253	54314
1350	chr1	210360460	210361251	792	Promoter (1-2kb)	210362852	210464655	101804	55733	ENST00000426968.2	HHAT	-1601
1351	chr5	178236900	178241543	4644	3' UTR	178208584	178232791	24208	85007	ENST00000489262.5	PHYKPL	-4109
1352	chr19	7985207	7985509	303	Intron (ENST00000407627.6/1994, intron 2 of 5)	7960917	7981112	20196	1994	ENST00000596154.5	ELAVL1	-4095
1353	chr10	84354684	84355121	438	Intron (ENST00000372088.7/54462, intron 1 of 9)	84328663	84518517	189855	54462	ENST00000224756.12	CCSER2	26021
1354	chr2	55365321	55365637	317	Promoter (1-2kb)	55336716	55364238	27523	55704	ENST00000647383.1	CCDC88A	-1083
1355	chr10	116429564	116430642	1079	Promoter (1-2kb)	116427867	116477957	50091	119548	ENST00000369230.3	PNLIPRP3	1697
1356	chr10	74981110	74981915	806	3' UTR	74985329	75021954	36626	23522	ENST00000647891.1	KAT6B	-3414
1357	chrX	142662985	142664287	1303	Distal Intergenic	143025918	143034280	8363	441525	ENST00000446864.1	SPANXN4	-361631
1358	chr12	45587332	45587702	371	Intron (ENST00000551229.2/ENST00000551229.2, intron 2 of 4)	45718046	45727775	9730	400027	ENST00000609803.2	LINC00938	140073
1359	chr4	77557183	77557425	243	Intron (ENST00000286758.4/10563, intron 1 of 4)	77511753	77611834	100082	10563	ENST00000286758.4	CXCL13	45430
1360	chr5	14763506	14763872	367	Intron (ENST00000284268.7/56172, intron 2 of 11)	14768162	14769150	989	56172	ENST00000646501.1	ANKH	5278
1361	chr1	61263743	61264106	364	Intron (ENST00000371191.5/4774, intron 2 of 10)	61248996	61253510	4515	645030	ENST00000596404.1	NFIA-AS1	-10233
1362	chr18	22604027	22606062	2036	Distal Intergenic	22723503	22731565	8063	101927571	ENST00000581177.1	LOC101927571	125503
1363	chr5	157297083	157297484	402	Intron (ENST00000616178.4/26999, intron 5 of 31)	157300818	157303123	2306	26999	ENST00000518511.1	CYFIP2	-3334
1364	chr4	159042552	159042794	243	Distal Intergenic	158893544	159038760	145217	152940	ENST00000508011.1	C4orf45	-3792
1365	chr22	19936491	19936922	432	Promoter (1-2kb)	19875518	19938179	62662	10587	ENST00000542719.6	TXNRD2	1257
1366	chr1	215677381	215677623	243	Intron (ENST00000307340.7/7399, intron 62 of 71)	215618705	215620203	1499	51133	ENST00000465650.1	KCTD3	58676
1367	chr6	111513219	111513461	243	Intron (ENST00000438298.6/643749, intron 1 of 2)	111484652	111576590	91939	643749	ENST00000440395.1	TRAF3IP2-AS1	28567
1368	chr9	127808544	127808993	450	Promoter (<=1kb)	127808722	127810058	1337	2356	ENST00000473536.1	FPGS	0
1369	chr7	100575686	100576132	447	Promoter (<=1kb)	100574011	100576943	2933	4034	ENST00000485554.5	LRCH4	811
1370	chrX	84907813	84908253	441	Distal Intergenic	84934151	84934890	740	100131816	ENST00000602536.1	UBE2DNL	-25898
1371	chr11	59603405	59603741	337	Promoter (2-3kb)	59576833	59600856	24024	5007	ENST00000525357.1	OSBP	-2549
1372	chr3	10474545	10474908	364	Intron (ENST00000397077.6/491, intron 1 of 19)	10328203	10449780	121578	491	ENST00000644807.1	ATP2B2	-24765
1373	chr5	66727377	66729039	1663	Intron (ENST00000403625.6/375449, intron 1 of 28)	66738031	66788705	50675	375449	ENST00000478569.1	MAST4	-8992
1374	chr5	131406909	131408237	1329	Distal Intergenic	131385606	131398446	12841	56990	ENST00000502582.1	CDC42SE2	21303
1375	chr12	119665031	119665714	684	Promoter (2-3kb)	119667753	119681630	13878	5564	ENST00000229328.9	PRKAB1	-2039
1376	chr2	31573049	31575143	2095	Intron (ENST00000622030.1/6716, intron 1 of 4)	31522480	31581067	58588	6716	ENST00000622030.1	SRD5A2	5924
1377	chr13	75378218	75378460	243	Intron (ENST00000377625.6/9882, intron 1 of 18)	75283503	75367015	83513	9882	ENST00000648194.1	TBC1D4	-11203
1378	chr1	17662644	17663008	365	Intron (ENST00000361221.7/55160, intron 25 of 28)	17639753	17654665	14913	55160	ENST00000466782.1	ARHGEF10L	22891
1379	chr11	78038565	78038807	243	5' UTR	78016593	78046191	29599	65987	ENST00000533144.1	KCTD14	7384
1380	chr4	185877531	185877773	243	Intron (ENST00000284776.11/8470, intron 1 of 20)	185775281	185933370	158090	8470	ENST00000488562.1	SORBS2	55597
1381	chr11	73048694	73048936	243	Intron (ENST00000311172.11/9873, intron 2 of 18)	72983765	72989012	5248	9873	ENST00000543644.1	FCHSD2	-59682
1382	chr3	7739734	7740625	892	3' UTR	7520138	7560333	40196	100873937	ENST00000427273.1	GRM7-AS1	-179401
1383	chr8	74735563	74737594	2032	Intron (ENST00000523442.5/441355, intron 4 of 6)	74705693	74705747	55	100302260	ENST00000636055.1	MIR2052	29870
1384	chr10	12046816	12047242	427	Distal Intergenic	12035059	12043170	8112	26019	ENST00000460569.1	UPF2	-3646
1385	chr17	31916929	31917564	636	Distal Intergenic	31860899	31901765	40867	55813	ENST00000261708.8	UTP6	-15164
1386	chr9	86386712	86388827	2116	Distal Intergenic	86287733	86354454	66722	79670	ENST00000375960.6	TUT7	-32258
1387	chr3	74406776	74416636	9861	Intron (ENST00000263665.6/5067, intron 4 of 21)	74262568	74521140	258573	5067	ENST00000263665.6	CNTN3	104504
1388	chr5	39328510	39328902	393	Intron (ENST00000263408.4/735, intron 5 of 10)	39341081	39364495	23415	735	ENST00000467285.1	C9	35593
1389	chr8	125132534	125132910	377	Intron (ENST00000523741.5/286053, intron 3 of 4)	125124144	125367118	242975	286053	ENST00000517315.1	NSMCE2	8390
1390	chr15	52537250	52537827	578	Distal Intergenic	52307288	52529050	221763	4644	ENST00000613858.4	MYO5A	-8200
1391	chr8	99362169	99362411	243	Intron (ENST00000496144.5/157680, intron 19 of 33)	99389616	99442411	52796	157680	ENST00000521037.1	VPS13B	-27205
1392	chr2	68491163	68493043	1881	Intron (ENST00000303795.8/200558, intron 2 of 9)	68467603	68580162	112560	200558	ENST00000445692.5	APLF	23560
1393	chr2	173093948	173097812	3865	Intron (ENST00000539448.5/51776, intron 2 of 11)	173090619	173187623	97005	51776	ENST00000422149.1	MAP3K20	3329
1394	chr4	154623485	154623793	309	Distal Intergenic	154626961	154744533	117573	9227	ENST00000502525.5	LRAT	-3168
1395	chr17	80132132	80132566	435	Downstream (2-3kb)	80135264	80136322	1059	9775	ENST00000570625.5	EIF4A3	3756
1396	chr9	114236048	114236290	243	Intron (ENST00000356083.7/85301, intron 17 of 60)	114240220	114246121	5902	85301	ENST00000485397.1	COL27A1	-3930
1397	chr13	18534060	18534380	321	Distal Intergenic	18816718	18871967	55250	284232	ENST00000457997.1	ANKRD20A9P	337587
1398	chr8	9350230	9350840	611	Intron (ENST00000520255.5/157273, intron 2 of 3)	9326128	9413878	87751	157273	ENST00000649280.1	LOC157273	24102
1399	chr18	34077738	34078051	314	Intron (ENST00000261592.9/8715, intron 5 of 10)	33852290	34048594	196305	8715	ENST00000535384.5	NOL4	-29144
1400	chr14	21020624	21021491	868	Promoter (<=1kb)	21016772	21020669	3898	57447	ENST00000556716.5	NDRG2	0
1401	chr11	2324784	2327000	2217	Downstream (1-2kb)	2316636	2318142	1507	10077	ENST00000486011.1	TSPAN32	8148
1402	chr12	115135531	115136460	930	Distal Intergenic	114670254	114684164	13911	6926	ENST00000349155.6	TBX3	-451367
1403	chr4	145487158	145487790	633	Promoter (2-3kb)	145484513	145514703	30191	4086	ENST00000506626.1	SMAD1	2645
1404	chr3	9955634	9956905	1272	Distal Intergenic	9945542	9952394	6853	285368	ENST00000412055.5	PRRT3	-3240
1405	chrX	21658445	21658841	397	Promoter (<=1kb)	21654690	21658330	3641	257240	ENST00000379499.3	KLHL34	-115
1406	chr2	178468029	178469731	1703	3' UTR	178467807	178478317	10511	51661	ENST00000412612.1	FKBP7	8586
1407	chr1	159496589	159496995	407	Distal Intergenic	159535078	159536007	930	127385	ENST00000334857.3	OR10J5	39012
1408	chr9	92655654	92656938	1285	Exon (ENST00000287996.7/64768, exon 3 of 13)	92613184	92670265	57082	64768	ENST00000287996.7	IPPK	13327
1409	chr5	76296649	76296951	303	Intron (ENST00000502798.6/22987, intron 9 of 12)	76291765	76296122	4358	22987	ENST00000506257.1	SV2C	4884
1410	chr13	102293113	102295532	2420	Exon (ENST00000607251.5/283480, exon 4 of 4)	102292687	102367399	74713	283480	ENST00000437115.2	FGF14-IT1	71867
1411	chr7	99759648	99776818	17171	Exon (ENST00000608397.1/ENST00000608397.1, exon 1 of 1)	99769535	99780053	10519	1576	ENST00000480043.1	CYP3A4	3235
1412	chr19	8022680	8023006	327	Distal Intergenic	7963630	8005659	42030	1994	ENST00000593807.1	ELAVL1	-17021
1413	chrX	154790887	154794189	3303	Promoter (<=1kb)	154785084	154791195	6112	4354	ENST00000488754.5	MPP1	0
1414	chr14	89487774	89488110	337	Intron (ENST00000345097.8/1112, intron 1 of 6)	89412197	89494051	81855	1112	ENST00000555034.5	FOXN3	5941
1415	chr2	119291737	119292818	1082	Distal Intergenic	119244422	119249071	4650	100874111	ENST00000454260.1	STEAP3-AS1	-42666
1416	chr15	89184328	89186537	2210	Promoter (<=1kb)	89185415	89193453	8039	11057	ENST00000568308.1	ABHD2	0
1417	chr13	112229275	112232166	2892	Distal Intergenic	112197350	112201000	3651	101928698	ENST00000561786.1	LINC01070	31925
1418	chr18	23350303	23350606	304	Intron (ENST00000581444.5/85019, intron 13 of 15)	23297875	23331574	33700	85019	ENST00000577448.5	TMEM241	-18729
1419	chr2	22903882	22904472	591	Distal Intergenic	22536479	22538288	1810	102723362	ENST00000433429.1	LINC01884	367403
1420	chr17	70677786	70678413	628	Distal Intergenic	70169535	70180048	10514	3759	ENST00000243457.3	KCNJ2	508251
1421	chr4	15729643	15729885	243	Intron (ENST00000265016.8/683, intron 8 of 8)	15715328	15738313	22986	683	ENST00000514989.1	BST1	14315
1422	chr3	17580117	17582266	2150	Intron (ENST00000253692.11/9779, intron 2 of 21)	17508474	17623913	115440	9779	ENST00000486224.5	TBC1D5	41647
1423	chr8	80684303	80684545	243	Intron (ENST00000327835.7/619279, intron 4 of 8)	80664842	80673339	8498	619279	ENST00000522040.5	ZNF704	-10964
1424	chr12	92099295	92101409	2115	Intron (ENST00000551843.5/256021, intron 1 of 5)	91993192	92137021	143830	256021	ENST00000552277.3	LINC01619	35612
1425	chr21	42630003	42630616	614	Distal Intergenic	42599280	42615058	15779	101928233	ENST00000419628.1	LINC01671	-14945
1426	chr3	100582993	100583678	686	Distal Intergenic	100571030	100577065	6036	55076	ENST00000488904.1	TMEM45A	11963
1427	chr16	56660023	56660467	445	Promoter (2-3kb)	56658012	56659305	1294	4494	ENST00000568475.1	MT1F	2011
1428	chr15	61062635	61065249	2615	Intron (ENST00000335670.10/6095, intron 1 of 10)	60511294	61229133	717840	6095	ENST00000551975.5	RORA	163884
1429	chr4	141336952	141337194	243	Distal Intergenic	141323471	141332618	9148	100507639	ENST00000511213.1	LINC02432	-4334
1430	chr7	27789374	27789616	243	Intron (ENST00000543117.5/8887, intron 8 of 16)	27793138	27829022	35885	8887	ENST00000457186.2	TAX1BP1	-3522
1431	chr1	221567505	221568365	861	Distal Intergenic	221702427	221711816	9390	11221	ENST00000494642.1	DUSP10	143451
1432	chr9	14261870	14262112	243	Intron (ENST00000380959.7/4781, intron 2 of 8)	14087674	14300231	212558	4781	ENST00000636735.1	NFIB	38119
1433	chr21	13685204	13685910	707	Distal Intergenic	13724189	13724274	86	103504736	ENST00000621412.1	MIR8069-2	-38279
1434	chr16	84776219	84776461	243	Intron (ENST00000219473.11/9100, intron 13 of 13)	84768267	84778987	10721	9100	ENST00000567526.1	USP10	7952
1435	chr5	77392189	77393511	1323	Intron (ENST00000646262.1/8622, intron 12 of 23)	77410424	77428195	17772	8622	ENST00000505283.1	PDE8B	-16913
1436	chr17	7154364	7154606	243	Distal Intergenic	7173558	7177046	3489	432	ENST00000574330.5	ASGR1	22440
1437	chr21	29080002	29081154	1153	Promoter (<=1kb)	29080552	29175889	95338	56911	ENST00000399947.6	MAP3K7CL	0
1438	chr12	104127270	104127888	619	Promoter (<=1kb)	104121254	104128612	7359	4801	ENST00000550189.1	NFYB	724
1439	chr1	196908391	196908633	243	Intron (ENST00000367416.6/10877, intron 5 of 9)	196914750	196916630	1881	10877	ENST00000647770.1	CFHR4	-6117
1440	chr19	29702545	29702787	243	3' UTR	29702819	29708640	5822	83636	ENST00000591243.1	C19orf12	5853
1441	chr9	1978377	1981162	2786	Promoter (<=1kb)	1980290	2029051	48762	6595	ENST00000637383.1	SMARCA2	0
1442	chr10	21995364	21995763	400	Intron (ENST00000376980.7/64215, intron 1 of 11)	21919903	22003399	83497	64215	ENST00000447548.5	DNAJC1	7636
1443	chr11	2320108	2321595	1488	Distal Intergenic	2316636	2318142	1507	10077	ENST00000486011.1	TSPAN32	3472
1444	chr6	38384979	38385221	243	Intron (ENST00000314100.10/114781, intron 5 of 9)	38481692	38482531	840	101929425	ENST00000412822.1	BTBD9-AS1	-96471
1445	chr18	6402877	6403119	243	Intron (ENST00000317931.11/91133, intron 1 of 18)	6311600	6414184	102585	91133	ENST00000580162.1	L3MBTL4	11065
1446	chr17	41937605	41937975	371	Promoter (2-3kb)	41935298	41937041	1744	83538	ENST00000585530.1	TTC25	2307
1447	chr15	74786492	74786858	367	Promoter (1-2kb)	74788544	74803171	14628	1445	ENST00000567571.5	CSK	-1686
1448	chr10	4992669	4993109	441	Intron (ENST00000380753.8/1646, intron 7 of 8)	4989434	5003860	14427	1646	ENST00000421196.7	AKR1C2	10751
1449	chr4	3826573	3828954	2382	Distal Intergenic	3766398	3768526	2129	152	ENST00000330055.6	ADRA2C	60175
1450	chr1	196603662	196604736	1075	Intron (ENST00000367433.9/343450, intron 1 of 26)	196227859	196608359	380501	343450	ENST00000451324.6	KCNT2	3623
1451	chr16	72825593	72827221	1629	Intron (ENST00000268489.9/463, intron 5 of 9)	72829509	72889834	60326	463	ENST00000563625.1	ZFHX3	62613
1452	chr6	79083817	79084554	738	Distal Intergenic	78935867	79078236	142370	55023	ENST00000275034.4	PHIP	-5581
1453	chr2	109225800	109227360	1561	Intron (ENST00000309415.7/344558, intron 1 of 9)	109141490	109141588	99	100422863	ENST00000582152.1	MIR4265	-84212
1454	chr7	150824516	150824758	243	Promoter (<=1kb)	150824627	150861504	36878	26	ENST00000493429.5	AOC1	0
1455	chr1	213952212	213952560	349	Promoter (2-3kb)	213832541	213955239	122699	100505832	ENST00000593620.5	PROX1-AS1	2679
1456	chr10	56090861	56091547	687	Distal Intergenic	56357816	56359731	1916	11130	ENST00000460654.5	ZWINT	268184
1457	chr1	113010864	113011106	243	Intron (ENST00000627431.2/100506392, intron 4 of 5)	112917760	112957013	39254	6566	ENST00000429288.1	SLC16A1	-53851
1458	chr7	96241862	96242313	452	Intron (ENST00000265631.9/10165, intron 3 of 17)	96219662	96219756	95	693176	ENST00000385290.1	MIR591	-22106
1459	chr13	42537901	42539381	1481	Distal Intergenic	42562736	42607174	44439	8600	ENST00000358545.6	TNFSF11	-23355
1460	chr4	99580227	99580596	370	Intron (ENST00000513404.5/4547, intron 2 of 3)	99574824	99584193	9370	4547	ENST00000422897.6	MTTP	5403
1461	chr8	85928569	85928811	243	Intron (ENST00000518266.1/ENST00000518266.1, intron 1 of 1)	85826953	85828467	1515	100288527	ENST00000603433.2	REXO1L2P	-100102
1462	chr6	13438701	13439003	303	Intron (ENST00000379287.3/54438, intron 1 of 1)	13357830	13408137	50308	54438	ENST00000379284.1	GFOD1	-30564
1463	chr20	25041302	25041674	373	Intron (ENST00000432802.6/84532, intron 2 of 11)	25006230	25032706	26477	84532	ENST00000537502.5	ACSS1	-8596
1464	chr1	161548452	161548754	303	Promoter (<=1kb)	161545399	161549730	4332	2214	ENST00000476031.1	FCGR3A	976
1465	chr19	40846989	40847231	243	Promoter (2-3kb)	40843541	40844852	1312	1548	ENST00000599960.1	CYP2A6	-2137
1466	chr5	190821	191333	513	Promoter (<=1kb)	191511	195353	3843	389257	ENST00000328278.3	LRRC14B	-178
1467	chr2	31969799	31970473	675	Intron (ENST00000295065.9/51072, intron 1 of 8)	31867823	31963298	95476	51072	ENST00000379383.7	MEMO1	-6501
1468	chr1	36198239	36204804	6566	Distal Intergenic	36179021	36180315	1295	55700	ENST00000487114.1	MAP7D1	19218
1469	chr4	165187108	165187350	243	Intron (ENST00000506087.5/201931, intron 1 of 6)	165207618	165323153	115536	11275	ENST00000226725.10	KLHL2	-20268
1470	chr2	8099234	8099760	527	Intron (ENST00000456681.1/339788, intron 1 of 3)	8039934	8118324	78391	339789	ENST00000454043.1	LINC00299	18564
1471	chr12	21850223	21850820	598	Intron (ENST00000539874.1/ENST00000539874.1, intron 2 of 3)	21805174	21910978	105805	10060	ENST00000544039.5	ABCC9	60158
1472	chr2	100302041	100302467	427	Intron (ENST00000393437.7/164832, intron 3 of 11)	100283542	100309505	25964	164832	ENST00000409647.1	LONRF2	7038
1473	chr4	81686820	81687234	415	Intron (ENST00000638048.1/153020, intron 3 of 16)	81458983	81471928	12946	153020	ENST00000507538.1	RASGEF1B	-214892
1474	chr8	28681577	28682011	435	Intron (ENST00000522725.5/2137, intron 3 of 4)	28698212	28700530	2319	101929402	ENST00000523789.2	EXTL3-AS1	18519
1475	chr6	51828297	51828539	243	Intron (ENST00000371117.7/5314, intron 52 of 66)	51621821	51622541	721	101927082	ENST00000587000.2	LOC101927082	206476
1476	chr14	72903277	72904367	1091	Distal Intergenic	72661043	72894116	233074	8110	ENST00000614862.4	DPF3	-9161
1477	chr4	108760624	108760934	311	Promoter (1-2kb)	108756429	108762535	6107	64850	ENST00000512320.1	ETNPPL	1601
1478	chr4	73523333	73524439	1107	Intron (ENST00000502291.1/728040, intron 3 of 3)	73510211	73534128	23918	728040	ENST00000504368.1	LINC02499	13122
1479	chr11	34335608	34336528	921	Exon (ENST00000531489.1/ENST00000531489.1, exon 1 of 1)	34150988	34358008	207021	25841	ENST00000435224.2	ABTB2	21480
1480	chr14	66758321	66758563	243	Intron (ENST00000315266.9/10243, intron 2 of 21)	66823095	67181093	357999	10243	ENST00000544752.6	GPHN	-64532
1481	chr6	46582716	46582958	243	Intron (ENST00000619708.4/51302, intron 9 of 10)	46586265	46587125	861	51302	ENST00000476076.1	CYP39A1	4167
1482	chr5	55524433	55524891	459	Intron (ENST00000264775.9/8611, intron 1 of 5)	55530156	55530701	546	379013	ENST00000502765.1	RNF138P1	5810
1483	chr6	132336881	132337245	365	Intron (ENST00000367963.7/26002, intron 4 of 11)	132315697	132325147	9451	26002	ENST00000489128.1	MOXD1	-11734
1484	chr8	30128312	30128633	322	Intron (ENST00000520682.5/23484, intron 3 of 3)	30131824	30144686	12863	619373	ENST00000320542.3	MBOAT4	16053
1485	chr17	9324071	9324605	535	Intron (ENST00000306357.8/9482, intron 7 of 7)	9250487	9273434	22948	9482	ENST00000570987.1	STX8	-50637
1486	chr8	96834640	96835017	378	Exon (ENST00000220763.9/10404, exon 3 of 8)	96761240	96785287	24048	10404	ENST00000521142.1	CPQ	73400
1487	chr15	64733977	64734219	243	Distal Intergenic	64739892	64761217	21326	348093	ENST00000560606.5	RBPMS2	26998
1488	chr7	15314934	15315741	808	Intron (ENST00000342526.7/392636, intron 12 of 12)	15306235	15366187	59953	392636	ENST00000407277.6	AGMO	50446
1489	chr18	13425087	13429266	4180	Promoter (<=1kb)	13419421	13427480	8060	100288122	ENST00000588672.1	LDLRAD4-AS1	0
1490	chr6	160729516	160729849	334	Promoter (<=1kb)	160730740	160731833	1094	5340	ENST00000493435.1	PLG	-891
1491	chr11	73168401	73168911	511	Distal Intergenic	72838244	73142261	304018	9873	ENST00000409418.8	FCHSD2	-26140
1492	chr22	27950442	27951160	719	Intron (ENST00000430853.5/284900, intron 2 of 3)	27935161	27999657	64497	284900	ENST00000417497.5	TTC28-AS1	15281
1493	chr6	138585836	138586144	309	Intron (ENST00000491526.6/57224, intron 1 of 3)	138422043	138572540	150498	57224	ENST00000427025.6	NHSL1	-13296
1494	chr7	45721523	45721765	243	3' UTR	45723780	45728310	4531	641977	ENST00000444755.5	SEPTIN7P2	6545
1495	chr2	28341766	28346776	5011	Distal Intergenic	28307691	28310459	2769	100505716	ENST00000418963.1	LOC100505716	-31307
1496	chr10	12444963	12446639	1677	Intron (ENST00000619168.4/57118, intron 1 of 10)	12349733	12826143	476411	57118	ENST00000378845.5	CAMK1D	95230
1497	chr15	60524348	60531286	6939	Exon (ENST00000501579.6/101928784, exon 5 of 5)	60505606	60512097	6492	6095	ENST00000559587.1	RORA	-12251
1498	chr13	80491027	80491459	433	Distal Intergenic	80335976	80340951	4976	10253	ENST00000377104.3	SPRY2	-150076
1499	chr3	114834788	114835187	400	Intron (ENST00000357258.8/26137, intron 3 of 9)	114388066	114861793	473728	26137	ENST00000480832.5	ZBTB20	26606
1500	chr14	81144350	81146110	1761	3' UTR	81108349	81108840	492	7253	ENST00000556031.1	TSHR	36001
1501	chr5	129102060	129103035	976	Intron (ENST00000514194.5/51015, intron 1 of 2)	129097688	129097766	79	100616175	ENST00000584064.1	MIR4633	4372
1502	chr2	119822114	119822356	243	Intron (ENST00000263708.6/5775, intron 2 of 26)	119877323	119934960	57638	5775	ENST00000433888.5	PTPN4	-54967
1503	chr8	63030785	63033383	2599	Promoter (<=1kb)	63023509	63030216	6708	8836	ENST00000518113.1	GGH	-569
1504	chr11	22081134	22081376	243	Intron (ENST00000648804.1/203859, intron 5 of 23)	22193176	22283357	90182	203859	ENST00000324559.8	ANO5	-111800
1505	chr15	57405419	57407714	2296	Exon (ENST00000557813.2/ENST00000557813.2, exon 7 of 8)	57376505	57550727	174223	84952	ENST00000281282.5	CGNL1	28914
1506	chr1	41104652	41105353	702	Intron (ENST00000397174.6/22955, intron 5 of 12)	41041422	41070631	29210	22955	ENST00000482530.1	SCMH1	-34021
1507	chr15	81014186	81014931	746	Intron (ENST00000560091.5/161502, intron 1 of 4)	81007033	81138067	131035	161502	ENST00000560091.5	CFAP161	7153
1508	chr2	201076193	201076435	243	Intron (ENST00000450023.5/4709, intron 1 of 2)	201072030	201085750	13721	4709	ENST00000454214.1	NDUFB3	4163
1509	chr8	124749004	124749246	243	Distal Intergenic	124550790	124728429	177640	9788	ENST00000518547.5	MTSS1	-20575
1510	chr2	133240999	133241310	312	Intron (ENST00000409261.5/344148, intron 4 of 19)	133264968	133269010	4043	101928161	ENST00000454699.5	NCKAP5-AS2	-23658
1511	chr2	71455064	71459593	4530	Promoter (1-2kb)	71453722	71686768	233047	8291	ENST00000258104.7	DYSF	1342
1512	chr3	175059578	175060185	608	Exon (ENST00000414101.1/ENST00000414101.1, exon 1 of 1)	175079312	175112600	33289	100862679	ENST00000436929.1	NAALADL2-AS3	52415
1513	chr16	56386397	56386805	409	Promoter (<=1kb)	56367291	56385972	18682	267	ENST00000566334.1	AMFR	-425
1514	chr20	1932637	1933494	858	Intron (ENST00000400068.7/140885, intron 7 of 8)	1947246	2007517	60272	727993	ENST00000446562.1	PDYN-AS1	-13752
1515	chr9	12802418	12802721	304	Intron (ENST00000319264.3/286343, intron 1 of 1)	12700100	12814345	114246	101929467	ENST00000417638.1	LURAP1L-AS1	11624
1516	chr10	119149098	119149544	447	Intron (ENST00000490417.6/119559, intron 2 of 4)	119140913	119155123	14211	119559	ENST00000484960.5	SFXN4	5579
1517	chr10	99374857	99375482	626	Intron (ENST00000356713.4/26507, intron 6 of 10)	99368337	99377328	8992	26507	ENST00000488090.1	CNNM1	6520
1518	chr19	45304731	45305142	412	3' UTR	45294355	45303369	9015	57787	ENST00000622871.1	MARK4	10376
1519	chr5	134091339	134092957	1619	Distal Intergenic	134114711	134147997	33287	6932	ENST00000342854.9	TCF7	-21754
1520	chr7	99687254	99688320	1067	Intron (ENST00000620220.4/100861540, intron 12 of 12)	99671222	99680026	8805	1577	ENST00000439761.2	CYP3A5	-7228
1521	chr5	67850924	67851166	243	Intron (ENST00000510621.5/ENST00000510621.5, intron 1 of 3)	67797345	67800077	2733	101928858	ENST00000509947.1	LOC101928858	53579
1522	chr2	117978732	117983500	4769	Intron (ENST00000319432.9/54520, intron 7 of 23)	117951489	117996289	44801	54520	ENST00000460781.1	CCDC93	12789
1523	chr13	100560830	100561238	409	Intron (ENST00000376250.6/87769, intron 1 of 2)	100530183	100583997	53815	87769	ENST00000376250.6	GGACT	22759
1524	chr1	43310112	43314903	4792	Promoter (<=1kb)	43313174	43314150	977	7075	ENST00000471187.1	TIE1	0
1525	chr11	128168139	128168381	243	Exon (ENST00000649115.1/ENST00000649115.1, exon 4 of 9)	128208749	128241433	32685	105369564	ENST00000650607.1	LINC02098	-40368
1526	chrX	155062365	155062784	420	Promoter (2-3kb)	155061628	155065368	3741	100272147	ENST00000369479.1	CMC4	2584
1527	chr8	117593490	117593809	320	Distal Intergenic	117530364	117540002	9639	90390	ENST00000519391.1	MED30	63126
1528	chr5	54653310	54653900	591	Distal Intergenic	54517865	54521004	3140	112574	ENST00000343017.11	SNX18	135445
1529	chr8	117677644	117677947	304	Distal Intergenic	117530364	117540002	9639	90390	ENST00000519391.1	MED30	147280
1530	chr6	139019271	139020931	1661	Distal Intergenic	139028682	139043302	14621	58527	ENST00000367660.3	ABRACL	-7751
1531	chr1	215630595	215632833	2239	Intron (ENST00000307340.7/7399, intron 70 of 71)	215618705	215620203	1499	51133	ENST00000465650.1	KCTD3	11890
1532	chr3	66485068	66485310	243	Intron (ENST00000273261.7/26018, intron 1 of 18)	66414958	66498259	83302	26018	ENST00000475366.5	LRIG1	12949
1533	chr2	113368427	113368808	382	Distal Intergenic	113437691	113496189	58499	150472	ENST00000259199.8	CBWD2	-68883
1534	chr18	3345137	3345444	308	Downstream (2-3kb)	3347776	3350559	2784	105371964	ENST00000558690.1	LINC01895	5115
1535	chr7	75978726	75984417	5692	Promoter (<=1kb)	75980932	75983793	2862	5447	ENST00000460892.1	POR	0
1536	chr12	75502793	75503035	243	Promoter (1-2kb)	75499830	75504282	4453	11103	ENST00000551070.5	KRR1	1247
1537	chr19	29680148	29680709	562	Distal Intergenic	29666874	29674223	7350	79156	ENST00000586888.1	PLEKHF1	13274
1538	chr5	25966635	25968105	1471	Distal Intergenic	25297734	25311370	13637	105374693	ENST00000641091.1	LINC02211	668901
1539	chr11	4180840	4181282	443	Distal Intergenic	4187140	4202655	15516	100506082	ENST00000525365.1	LOC100506082	-5858
1540	chr19	15476173	15481439	5267	Promoter (<=1kb)	15468645	15479501	10857	114770	ENST00000292609.8	PGLYRP2	0
1541	chr10	59076160	59076402	243	Distal Intergenic	58999626	59001543	1918	100507008	ENST00000432535.1	LINC00844	76534
1542	chr3	53154770	53155782	1013	Promoter (<=1kb)	53156009	53179694	23686	5580	ENST00000478843.5	PRKCD	-227
1543	chr6	143144128	143144519	392	Intron (ENST00000367601.8/51390, intron 3 of 5)	143126250	143333445	207196	51390	ENST00000458219.1	AIG1	17878
1544	chr10	87334321	87334847	527	Promoter (1-2kb)	87238667	87336808	98142	728190	ENST00000433530.5	NUTM2A-AS1	1961
1545	chr12	26815711	26815953	243	Intron (ENST00000381340.7/3709, intron 1 of 56)	26721287	26832781	111495	3709	ENST00000242737.5	ITPR2	16828
1546	chr13	108947035	108947769	735	Intron (ENST00000356711.6/23026, intron 16 of 34)	108855296	108888477	33182	23026	ENST00000482793.1	MYO16	91739
1547	chr1	71921260	71921502	243	Intron (ENST00000357731.9/257194, intron 2 of 6)	71794232	71837012	42781	100852409	ENST00000453121.1	NEGR1-IT1	-84248
1548	chr2	111135442	111136056	615	Intron (ENST00000357757.6/10018, intron 3 of 5)	111123752	111146284	22533	10018	ENST00000438054.1	BCL2L11	11690
1549	chr2	45741157	45741399	243	Intron (ENST00000421201.1/5581, intron 2 of 2)	45697972	45852026	154055	5581	ENST00000497602.1	PRKCE	43185
1550	chr9	128009749	128009991	243	Distal Intergenic	127940579	127980513	39935	399665	ENST00000373095.5	FAM102A	-29236
1551	chr18	27056341	27056583	243	Intron (ENST00000578701.5/147429, intron 2 of 3)	26915777	27143038	227262	83539	ENST00000581714.5	CHST9	86455
1552	chr2	119721538	119722507	970	Distal Intergenic	119759631	119983818	224188	5775	ENST00000263708.6	PTPN4	-37124
1553	chr5	73737743	73738197	455	Intron (ENST00000296794.10/64283, intron 2 of 34)	73684832	73941993	257162	64283	ENST00000426542.6	ARHGEF28	52911
1554	chr15	45184719	45185997	1279	Promoter (1-2kb)	45174223	45187459	13237	90525	ENST00000561091.1	SHF	1462
1555	chr14	81206576	81206955	380	Intron (ENST00000553612.5/2957, intron 2 of 8)	81202695	81202834	140	677845	ENST00000408376.1	SNORA79	-3742
1556	chr16	85636970	85637854	885	Intron (ENST00000635906.1/23199, intron 1 of 2)	85654432	85676204	21773	23199	ENST00000412692.5	GSE1	-16578
1557	chr1	97892637	97892879	243	Intron (ENST00000370192.7/1806, intron 1 of 22)	97855030	97920997	65968	1806	ENST00000460019.1	DPYD	28118
1558	chr10	117318324	117318566	243	Promoter (<=1kb)	117285108	117318978	33871	118987	ENST00000489302.5	PDZD8	412
1559	chr1	152517507	152517879	373	Distal Intergenic	152514502	152516010	1509	54544	ENST00000368790.3	CRCT1	3005
1560	chr12	123229617	123229859	243	Promoter (<=1kb)	123154215	123230446	76232	10198	ENST00000541076.6	MPHOSPH9	587
1561	chr11	40516338	40516580	243	Intron (ENST00000528697.5/57689, intron 3 of 6)	40114205	40319730	205526	57689	ENST00000619527.4	LRRC4C	-196608
1562	chr2	233602749	233605081	2333	Exon (ENST00000456635.1/ENST00000456635.1, exon 1 of 1)	233617645	233773310	155666	54576	ENST00000373450.4	UGT1A8	-12564
1563	chr20	47763122	47763499	378	Intron (ENST00000359930.8/55959, intron 1 of 20)	47684514	47757331	72818	55959	ENST00000474450.5	SULF2	-5791
1564	chr3	188959244	188959787	544	Intron (ENST00000433971.5/285386, intron 1 of 10)	188941715	188947639	5925	100874043	ENST00000444488.1	TPRG1-AS1	-11605
1565	chr6	137370553	137372124	1572	Distal Intergenic	137492202	137494250	2049	167826	ENST00000367734.3	OLIG3	122126
1566	chr10	129524050	129524292	243	Intron (ENST00000306010.7/4255, intron 1 of 4)	129467262	129537164	69903	4255	ENST00000482547.1	MGMT	56788
1567	chr22	36284759	36286728	1970	Promoter (<=1kb)	36284162	36286044	1883	4627	ENST00000475726.5	MYH9	0
1568	chr17	82507517	82508531	1015	Distal Intergenic	82519713	82602392	82680	3607	ENST00000473637.6	FOXK2	-11182
1569	chr2	122696825	122698248	1424	Distal Intergenic	123066151	123073481	7331	107985818	ENST00000432894.1	LINC01826	375233
1570	chr8	103770296	103770538	243	Intron (ENST00000504942.6/9699, intron 3 of 23)	103766227	103768501	2275	9699	ENST00000395361.3	RIMS2	4069
1571	chr6	151889524	151889766	243	Intron (ENST00000440973.5/2099, intron 5 of 9)	151880657	152061059	180403	2099	ENST00000415488.1	ESR1	8867
1572	chr12	39892109	39892706	598	Intron (ENST00000468200.2/283461, intron 18 of 18)	39829408	39871881	42474	114134	ENST00000465517.1	SLC2A13	-20228
1573	chr20	39784600	39784842	243	Distal Intergenic	40004477	40008245	3769	100505663	ENST00000432633.1	LINC01370	-219635
1574	chr12	76489110	76489659	550	Intron (ENST00000393249.6/114882, intron 4 of 25)	76397856	76486108	88253	114882	ENST00000548341.5	OSBPL8	-3002
1575	chr5	43627105	43627347	243	Intron (ENST00000264663.9/23530, intron 6 of 21)	43613091	43616034	2944	23530	ENST00000515208.1	NNT	14014
1576	chr13	31975134	31975575	442	Exon (ENST00000622073.1/ENST00000622073.1, exon 1 of 1)	31946087	31991931	45845	196549	ENST00000643293.1	EEF1DP3	29047
1577	chr2	135702097	135702339	243	Intron (ENST00000409478.5/23518, intron 17 of 22)	135721509	135722547	1039	23518	ENST00000483065.1	R3HDM1	-19170
1578	chr3	185207531	185207835	305	Intron (ENST00000231887.7/1962, intron 5 of 6)	185204656	185235462	30807	1962	ENST00000483104.5	EHHADH	27627
1579	chr1	9265282	9265724	443	3' UTR	9239844	9267898	28055	9563	ENST00000602477.1	H6PD	25438
1580	chr6	160370996	160371238	243	Intron (ENST00000275300.2/6581, intron 1 of 10)	160348268	160452581	104314	6581	ENST00000275300.2	SLC22A3	22728
1581	chr3	30761042	30761488	447	Intron (ENST00000282538.9/339896, intron 14 of 14)	30728108	30779073	50966	339896	ENST00000498387.1	GADL1	17585
1582	chr12	113401520	113401832	313	Promoter (2-3kb)	113396640	113403886	7247	10993	ENST00000553112.5	SDS	2054
1583	chr7	97218192	97219922	1731	Distal Intergenic	97142681	97181647	38967	57001	ENST00000479853.1	SDHAF3	75511
1584	chr18	46215976	46216926	951	5' UTR	46174086	46232936	58851	147339	ENST00000615553.1	C18orf25	41890
1585	chr3	100580250	100580492	243	Distal Intergenic	100571030	100577065	6036	55076	ENST00000488904.1	TMEM45A	9220
1586	chr12	32553108	32553423	316	Intron (ENST00000534526.6/121512, intron 1 of 16)	32534324	32640737	106414	121512	ENST00000525053.5	FGD4	18784
1587	chr9	83925154	83925396	243	Distal Intergenic	83836698	83921465	84768	55582	ENST00000413982.5	KIF27	-3689
1588	chr10	112153287	112153529	243	3' UTR	112153870	112183710	29841	57678	ENST00000369425.5	GPAM	30181
1589	chr10	4909688	4909930	243	Distal Intergenic	4871901	4891975	20075	389932	ENST00000432950.1	AKR1C6P	-17713
1590	chr1	213931099	213932764	1666	Intron (ENST00000433082.6/100505832, intron 2 of 5)	213832541	213937423	104883	100505832	ENST00000600591.5	PROX1-AS1	4659
1591	chr20	48104042	48106706	2665	Distal Intergenic	47980488	47988744	8257	101927457	ENST00000428999.1	LINC01522	-115298
1592	chr14	58131004	58131246	243	Promoter (1-2kb)	58131207	58133131	1925	145407	ENST00000555101.1	ARMH4	1885
1593	chr5	36401543	36402084	542	Distal Intergenic	36265463	36302114	36652	202151	ENST00000505865.1	RANBP3L	-99429
1594	chr2	208367462	208372384	4923	Intron (ENST00000617735.4/5746, intron 1 of 12)	208359714	208494029	134316	5746	ENST00000617735.4	PTH2R	7748
1595	chr8	76680219	76684834	4616	Promoter (<=1kb)	76491200	76683156	191957	100192378	ENST00000522961.1	ZFHX4-AS1	0
1596	chr6	138589166	138590600	1435	Intron (ENST00000491526.6/57224, intron 1 of 3)	138422043	138572540	150498	57224	ENST00000427025.6	NHSL1	-16626
1597	chr1	111890601	111890843	243	Intron (ENST00000369697.5/3752, intron 1 of 5)	111909336	111910161	826	100873995	ENST00000441125.1	KCND3-AS1	-18493
1598	chr3	52782198	52782593	396	Promoter (1-2kb)	52784412	52792033	7622	3697	ENST00000428133.5	ITIH1	-1819
1599	chr22	25383584	25384568	985	Promoter (2-3kb)	25351612	25381578	29967	91355	ENST00000650500.1	LRP5L	-2006
1600	chr10	87168531	87168842	312	Intron (ENST00000298784.5/54537, intron 4 of 8)	87225448	87234978	9531	728118	ENST00000381707.6	NUTM2A	-56606
1601	chr3	37917787	37918200	414	Intron (ENST00000443503.6/10217, intron 1 of 6)	37944714	37975786	31073	10217	ENST00000486978.5	CTDSPL	-26514
1602	chr18	57389589	57389831	243	Distal Intergenic	57357152	57371731	14580	51046	ENST00000586360.1	ST8SIA3	32437
1603	chr16	14109773	14114698	4926	Intron (ENST00000574998.5/57496, intron 3 of 4)	14092837	14141529	48693	57496	ENST00000575833.1	MRTFB	16936
1604	chr12	126937019	126937948	930	Intron (ENST00000512624.6/101927592, intron 4 of 6)	126869490	126874690	5201	440117	ENST00000507482.6	LINC02372	-62329
1605	chr11	110526274	110526857	584	Distal Intergenic	110577043	110589685	12643	57569	ENST00000529591.5	ARHGAP20	62828
1606	chr16	19835533	19837069	1537	Intron (ENST00000308214.13/124152, intron 7 of 7)	19827064	19857585	30522	124152	ENST00000568061.1	IQCK	8469
1607	chr11	67069554	67070179	626	Intron (ENST00000308831.6/29984, intron 3 of 4)	67056889	67071691	14803	29984	ENST00000532559.1	RHOD	12665
1608	chr6	37018792	37019627	836	Promoter (1-2kb)	37021542	37029069	7528	221472	ENST00000487920.1	FGD2	-1915
1609	chr4	48046202	48046444	243	Distal Intergenic	48025127	48038860	13734	152519	ENST00000511123.1	NIPAL1	21075
1610	chr8	70374613	70375789	1177	Intron (ENST00000452400.6/10499, intron 1 of 22)	70112070	70402079	290010	10499	ENST00000518287.6	NCOA2	26290
1611	chr9	125549038	125550421	1384	Intron (ENST00000373511.6/79109, intron 6 of 10)	125559114	125585627	26514	79109	ENST00000437973.2	MAPKAP1	35206
1612	chr14	73575849	73577212	1364	Promoter (1-2kb)	73574304	73575201	898	10965	ENST00000557857.1	ACOT2	1545
1613	chr10	92219706	92220276	571	Intron (ENST00000412050.8/22849, intron 2 of 9)	92046692	92243246	196555	22849	ENST00000412050.8	CPEB3	22970
1614	chr4	99594583	99595016	434	Exon (ENST00000511045.5/4547, exon 7 of 18)	99574824	99584193	9370	4547	ENST00000422897.6	MTTP	19759
1615	chr1	239315061	239315899	839	Distal Intergenic	239386565	239886596	500032	1131	ENST00000468573.5	CHRM3	-70666
1616	chr22	28934399	28935690	1292	Intron (ENST00000544604.6/84133, intron 1 of 8)	28917389	29053685	136297	84133	ENST00000402174.5	ZNRF3	17010
1617	chr7	90462853	90464300	1448	Promoter (2-3kb)	90466424	90790628	324205	5218	ENST00000449528.5	CDK14	-2124
1618	chr12	61301064	61303109	2046	Distal Intergenic	61708277	61827233	118957	338811	ENST00000550003.1	TAFA2	524124
1619	chr7	14192323	14192678	356	Intron (ENST00000399322.7/1607, intron 22 of 24)	14149157	14269201	120045	1607	ENST00000493142.1	DGKB	76523
1620	chr10	34551563	34551932	370	Intron (ENST00000545260.5/56288, intron 2 of 22)	34312264	34426731	114468	56288	ENST00000544292.5	PARD3	-124832
1621	chr16	83826430	83827849	1420	Distal Intergenic	83809122	83811667	2546	3281	ENST00000569301.1	HSBP1	17308
1622	chr17	18352479	18353539	1061	Exon (ENST00000395682.3/6470, exon 3 of 3)	18347514	18363346	15833	6470	ENST00000582653.1	SHMT1	9807
1623	chr4	99600456	99600800	345	Exon (ENST00000511045.5/4547, exon 9 of 18)	99574824	99584193	9370	4547	ENST00000422897.6	MTTP	25632
1624	chr1	93990193	93990435	243	Downstream (2-3kb)	94005375	94007752	2378	24	ENST00000484388.1	ABCA4	17317
1625	chr21	36497773	36502590	4818	Intron (ENST00000428667.1/ENST00000428667.1, intron 1 of 1)	36460621	36480090	19470	23562	ENST00000399137.5	CLDN14	-17683
1626	chr6	125770392	125770634	243	Distal Intergenic	125781161	125931111	149951	135112	ENST00000368357.7	NCOA7	-10527
1627	chr17	80744803	80745233	431	Promoter (1-2kb)	80743287	80966371	223085	57521	ENST00000575542.5	RPTOR	1516
1628	chr12	57414175	57414417	243	Intron (ENST00000347140.7/22864, intron 1 of 23)	57310340	57430790	120451	22864	ENST00000448732.1	R3HDM2	16373
1629	chr16	87530688	87530930	243	Distal Intergenic	87494187	87515635	21449	101928737	ENST00000563921.1	LOC101928737	36501
1630	chr4	155933959	155934201	243	Intron (ENST00000433477.3/1519, intron 5 of 7)	155914341	155918859	4519	6999	ENST00000510293.1	TDO2	19618
1631	chr10	95055802	95056108	307	Intron (ENST00000535898.5/1558, intron 4 of 7)	95040928	95067430	26503	1558	ENST00000628935.1	CYP2C8	11322
1632	chr3	148731181	148731423	243	Promoter (1-2kb)	148730180	148743001	12822	185	ENST00000418473.6	AGTR1	1001
1633	chr16	50353878	50354900	1023	Exon (ENST00000394688.7/29117, exon 3 of 17)	50334711	50361833	27123	29117	ENST00000475877.5	BRD7	6933
1634	chr6	116158220	116159311	1092	Promoter (<=1kb)	116125339	116158747	33409	1300	ENST00000418500.1	COL10A1	0
1635	chr7	70721067	70721564	498	Intron (ENST00000644939.1/26053, intron 6 of 18)	70729139	70764794	35656	26053	ENST00000416482.1	AUTS2	-7575
1636	chr3	113875677	113877178	1502	Exon (ENST00000479212.5/54762, exon 5 of 19)	113890625	113945770	55146	54762	ENST00000472026.5	GRAMD1C	-13447
1637	chr5	154741445	154741687	243	Intron (ENST00000336314.8/23367, intron 1 of 18)	154755575	154804208	48634	23367	ENST00000518297.5	LARP1	-13888
1638	chr4	189304519	189305138	620	Distal Intergenic	189659605	189661486	1882	101928971	ENST00000513681.1	LINC01262	-354467
1639	chr7	133329536	133330104	569	Intron (ENST00000393161.6/60412, intron 5 of 9)	133356387	133375028	18642	60412	ENST00000480840.1	EXOC4	-26283
1640	chr6	49570361	49570964	604	Exon (ENST00000407830.1/ENST00000407830.1, exon 6 of 7)	49552358	49555060	2703	135398	ENST00000530382.1	C6orf141	18003
1641	chr22	40083875	40084856	982	Intron (ENST00000441751.5/23112, intron 1 of 3)	40045474	40323360	277887	23112	ENST00000402203.5	TNRC6B	38401
1642	chr12	18152188	18152553	366	Intron (ENST00000540148.5/79785, intron 1 of 4)	18081218	18202070	120853	79785	ENST00000540148.5	RERGL	49517
1643	chr15	42427058	42428421	1364	Promoter (<=1kb)	42415295	42428104	12810	64397	ENST00000569648.5	ZNF106	0
1644	chr9	125526908	125527150	243	Intron (ENST00000373511.6/79109, intron 7 of 10)	125438813	125506366	67554	79109	ENST00000496063.1	MAPKAP1	-20542
1645	chr16	15520877	15521179	303	Intron (ENST00000300006.8/89927, intron 2 of 5)	15515343	15584182	68840	89927	ENST00000561692.5	BMERB1	5534
1646	chr9	14258104	14259003	900	Intron (ENST00000380959.7/4781, intron 2 of 8)	14087674	14300231	212558	4781	ENST00000636735.1	NFIB	41228
1647	chr1	59637493	59637735	243	Promoter (<=1kb)	59638228	59680995	42768	55277	ENST00000466791.5	FGGY	-493
1648	chr19	1844012	1844254	243	Intron (ENST00000170168.8/57455, intron 1 of 15)	1827648	1848446	20799	57455	ENST00000587524.1	REXO1	4192
1649	chr6	110684806	110685239	434	Intron (ENST00000413605.6/23097, intron 2 of 11)	110627002	110746201	119200	23097	ENST00000463016.1	CDK19	60962
1650	chr15	30605660	30606513	854	Promoter (1-2kb)	30604126	30614561	10436	728498	ENST00000566740.1	GOLGA8H	1534
1651	chr8	85543262	85543922	661	Distal Intergenic	85442047	85464915	22869	100996348	ENST00000521761.5	CA3-AS1	-78347
1652	chr9	129083721	129084823	1103	Promoter (<=1kb)	129084599	129085295	697	57171	ENST00000480255.2	DOLPP1	0
1653	chr13	99678990	99679666	677	Intron (ENST00000376355.7/171425, intron 1 of 7)	99690081	99690971	891	100874063	ENST00000430125.1	CLYBL-AS2	11305
1654	chr10	89597300	89597542	243	Intron (ENST00000307534.8/53354, intron 3 of 6)	89592747	89592827	81	406901	ENST00000362127.2	MIR107	-4473
1655	chr16	80828708	80828950	243	Exon (ENST00000562231.5/100996425, exon 3 of 3)	80830426	80835789	5364	100996425	ENST00000569356.1	ARLNC1	6839
1656	chr1	119897483	119897725	243	Promoter (<=1kb)	119893533	119896495	2963	11085	ENST00000369400.1	ADAM30	-988
1657	chr3	67405978	67406220	243	Intron (ENST00000493112.5/8801, intron 9 of 10)	67374719	67528222	153504	8801	ENST00000460567.5	SUCLG2	122002
1658	chr2	18598724	18599712	989	Distal Intergenic	18562932	18589572	26641	93034	ENST00000406971.6	NT5C1B	-9152
1659	chr12	24403492	24403734	243	Intron (ENST00000646273.1/6660, intron 2 of 16)	23845999	24357430	511432	6660	ENST00000536729.2	SOX5	-46062
1660	chr14	95338515	95342129	3615	Distal Intergenic	95329584	95335504	5921	101929080	ENST00000554522.1	LINC02292	8931
1661	chr1	152880254	152880701	448	Promoter (1-2kb)	152878317	152885047	6731	4184	ENST00000368765.3	SMCP	1937
1662	chr9	130020061	130033681	13621	Intron (ENST00000446176.6/23048, intron 1 of 16)	129887187	130043162	155976	23048	ENST00000446176.6	FNBP1	9481
1663	chr4	186195132	186195809	678	Promoter (<=1kb)	186196088	186213011	16924	285440	ENST00000507209.5	CYP4V2	-279
1664	chr2	44066514	44068720	2207	Distal Intergenic	43886508	43996005	109498	10128	ENST00000260665.11	LRPPRC	-70509
1665	chr11	72805327	72808400	3074	Intron (ENST00000624670.2/ENST00000624670.2, intron 3 of 4)	72814308	72829635	15328	89849	ENST00000321297.9	ATG16L2	-5908
1666	chr12	56990739	56992219	1481	Promoter (2-3kb)	56994446	56998441	3996	11318	ENST00000300098.2	GPR182	-2227
1667	chr11	61352134	61352726	593	Promoter (<=1kb)	61348890	61351284	2395	220002	ENST00000536452.1	CYB561A3	-850
1668	chr8	63091886	63094388	2503	Distal Intergenic	63059783	63086053	26271	7274	ENST00000260116.4	TTPA	-5833
1669	chr10	129692743	129692985	243	Intron (ENST00000306010.7/4255, intron 2 of 4)	129701627	129717867	16241	4255	ENST00000462672.1	MGMT	-8642
1670	chr5	36323316	36326040	2725	Distal Intergenic	36265463	36302114	36652	202151	ENST00000505865.1	RANBP3L	-21202
1671	chr15	60485170	60485617	448	Intron (ENST00000559824.5/101928784, intron 1 of 5)	60479220	60529889	50670	101928784	ENST00000558140.5	RORA-AS1	5950
1672	chr12	102430753	102430995	243	Intron (ENST00000635615.1/ENST00000635615.1, intron 5 of 5)	102402247	102415746	13500	3479	ENST00000481539.1	IGF1	-15007
1673	chr12	127122016	127122258	243	Distal Intergenic	126975839	127060401	84563	101927592	ENST00000540244.5	LINC02405	-61615
1674	chr8	28680900	28681207	308	Intron (ENST00000522725.5/2137, intron 3 of 4)	28698212	28700530	2319	101929402	ENST00000523789.2	EXTL3-AS1	19323
1675	chr12	11638753	11639264	512	Distal Intergenic	11649854	11895402	245549	2120	ENST00000396373.8	ETV6	-10590
1676	chr13	77358287	77358946	660	Distal Intergenic	77296603	77327050	30448	23077	ENST00000491491.1	MYCBP2	-31237
1677	chr2	202194196	202194507	312	Exon (ENST00000541917.6/100652824, exon 21 of 22)	202207246	202222006	14761	7341	ENST00000469034.1	SUMO1	27499
1678	chr1	101190556	101192513	1958	Exon (ENST00000603646.1/ENST00000603646.1, exon 1 of 1)	101235683	101236528	846	101928370	ENST00000432195.1	LOC101928370	44015
1679	chr6	11489516	11489758	243	Intron (ENST00000423149.1/ENST00000423149.1, intron 2 of 4)	11538278	11583524	45247	100113407	ENST00000379426.1	TMEM170B	-48520
1680	chr9	101737873	101738772	900	Promoter (<=1kb)	101569353	101738580	169228	116443	ENST00000361820.3	GRIN3A	0
1681	chr3	67632857	67633263	407	Intron (ENST00000493112.5/8801, intron 1 of 10)	67408606	67654607	246002	8801	ENST00000492795.1	SUCLG2	21344
1682	chr2	33036138	33036784	647	Intron (ENST00000404816.6/4052, intron 3 of 33)	32946972	33399359	452388	4052	ENST00000404816.6	LTBP1	89166
1683	chr1	230827688	230828134	447	Distal Intergenic	230839621	230856036	16416	84886	ENST00000523410.1	C1orf198	27902
1684	chr6	45191712	45192670	959	Intron (ENST00000475057.5/8464, intron 2 of 11)	45197674	45197770	97	693171	ENST00000385035.1	MIR586	5100
1685	chr10	94851062	94851370	309	Intron (ENST00000464755.1/1557, intron 13 of 13)	94773837	94853164	79328	1557	ENST00000645461.1	CYP2C19	77225
1686	chr1	63645209	63645921	713	Intron (ENST00000371084.7/5236, intron 7 of 10)	63651355	63654445	3091	5236	ENST00000483707.1	PGM1	-5434
1687	chr12	57442115	57442708	594	Intron (ENST00000309668.2/3626, intron 1 of 1)	57434760	57450828	16069	3626	ENST00000309668.2	INHBC	7355
1688	chr2	192145661	192147823	2163	Intron (ENST00000392314.5/23671, intron 4 of 9)	192176743	192194524	17782	23671	ENST00000409056.3	TMEFF2	46701
1689	chr16	19172720	19173714	995	Promoter (<=1kb)	19172354	19267107	94754	51760	ENST00000562711.6	SYT17	366
1690	chr4	68892884	68893254	371	Distal Intergenic	68929450	68951361	21912	79799	ENST00000503012.1	UGT2A3	58107
1691	chr10	116074372	116074614	243	Intron (ENST00000369236.5/2674, intron 7 of 8)	115909351	115944959	35609	26033	ENST00000449616.2	ATRNL1	165021
1692	chr4	76484450	76489346	4897	Intron (ENST00000296043.6/57619, intron 1 of 10)	76436146	76559576	123431	57619	ENST00000466541.1	SHROOM3	48304
1693	chr10	77022159	77022902	744	Promoter (1-2kb)	76877420	77021106	143687	3778	ENST00000639657.1	KCNMA1	-1053
1694	chr3	168123250	168124227	978	Distal Intergenic	168008677	168095975	87299	27333	ENST00000470487.5	GOLIM4	-27275
1695	chr1	149479194	149479530	337	Promoter (1-2kb)	149477960	149555625	77666	101060226	ENST00000369227.7	NBPF19	1234
1696	chr18	22883856	22884251	396	Intron (ENST00000583700.5/5932, intron 1 of 4)	22784365	22907721	123357	101927571	ENST00000583086.1	LOC101927571	23470
1697	chr2	95677779	95678021	243	Distal Intergenic	95592018	95599778	7761	129868	ENST00000272395.2	TRIM43	85761
1698	chr3	27466974	27467697	724	Intron (ENST00000425128.6/9497, intron 1 of 27)	27385892	27456754	70863	9497	ENST00000428179.1	SLC4A7	-10220
1699	chr11	15170574	15171238	665	Intron (ENST00000379554.7/387755, intron 2 of 12)	15188188	15246076	57889	387755	ENST00000447214.6	INSC	-16950
1700	chr12	128927614	128927922	309	Intron (ENST00000441390.6/144423, intron 7 of 10)	128864136	128983739	119604	144423	ENST00000537468.1	GLT1D1	63478
1701	chr10	11911169	11911411	243	Distal Intergenic	11849608	11894700	45093	219731	ENST00000445498.5	PROSER2-AS1	-16469
1702	chr17	58995009	58999467	4459	3' UTR	58982651	59012407	29757	4591	ENST00000583945.5	TRIM37	12940
1703	chr6	134866107	134866598	492	Distal Intergenic	134918530	134929161	10632	64577	ENST00000460753.1	ALDH8A1	62563
1704	chr1	171114160	171114402	243	Exon (ENST00000367755.8/2328, exon 7 of 9)	171101728	171101806	79	100302178	ENST00000408463.1	MIR1295A	-12354
1705	chr12	122972129	122972371	243	Promoter (2-3kb)	122974580	122980042	5463	79676	ENST00000397389.6	OGFOD2	-2209
1706	chr3	58181765	58183483	1719	Intron (ENST00000636329.1/ENST00000636329.1, intron 1 of 1)	58162547	58170636	8090	105377105	ENST00000488720.1	FLNB-AS1	-11129
1707	chr7	44322425	44322794	370	Promoter (1-2kb)	44243470	44323962	80493	816	ENST00000415369.5	CAMK2B	1168
1708	chr15	52691556	52691798	243	Intron (ENST00000561490.5/56204, intron 1 of 3)	52611694	52679372	67679	56204	ENST00000561543.5	FAM214A	-12184
1709	chr12	9831604	9831846	243	Intron (ENST00000617793.4/51348, intron 1 of 4)	9827521	9844657	17137	51348	ENST00000545196.1	KLRF1	4083
1710	chr10	18326459	18327197	739	Intron (ENST00000324631.12/783, intron 2 of 13)	18340685	18541109	200425	783	ENST00000377329.9	CACNB2	-13488
1711	chr12	26644290	26645748	1459	Intron (ENST00000414098.2/ENST00000414098.2, intron 2 of 2)	26621182	26630714	9533	3709	ENST00000545902.1	ITPR2	-13576
1712	chr11	108130998	108132497	1500	Promoter (1-2kb)	108133894	108139164	5271	38	ENST00000528370.1	ACAT1	-1397
1713	chr10	46720029	46721930	1902	Distal Intergenic	46770739	46776833	6095	414212	ENST00000583339.3	GLUD1P2	54903
1714	chr1	818748	819053	306	Promoter (1-2kb)	817371	819837	2467	400728	ENST00000326734.2	FAM87B	1377
1715	chr1	84652118	84652360	243	Promoter (<=1kb)	84650371	84652441	2071	117178	ENST00000490476.1	SSX2IP	81
1716	chr17	62597285	62600763	3479	Promoter (<=1kb)	62600278	62606188	5911	11011	ENST00000578931.1	TLK2	0
1717	chr5	73703157	73703487	331	Intron (ENST00000296794.10/64283, intron 2 of 34)	73684832	73941993	257162	64283	ENST00000426542.6	ARHGEF28	18325
1718	chr12	83350823	83351129	307	Distal Intergenic	82758555	83134302	375748	160335	ENST00000549919.1	TMTC2	592268
1719	chr17	9083083	9083473	391	Intron (ENST00000173229.6/9423, intron 2 of 6)	9021542	9244000	222459	9423	ENST00000173229.6	NTN1	61541
1720	chr19	18094315	18094557	243	Intron (ENST00000600835.6/3594, intron 1 of 17)	18097793	18151692	53900	23031	ENST00000262811.10	MAST3	-3236
1721	chr15	45396291	45397329	1039	Promoter (<=1kb)	45376609	45397259	20651	2628	ENST00000560538.1	GATM	0
1722	chr2	31426788	31427030	243	Distal Intergenic	31334321	31414715	80395	7498	ENST00000379416.3	XDH	-12073
1723	chr1	165281699	165282124	426	Intron (ENST00000342310.7/4009, intron 3 of 8)	165203408	165213280	9873	4009	ENST00000489443.2	LMX1A	-68419
1724	chr12	21756375	21757616	1242	Promoter (<=1kb)	21654657	21757831	103175	3945	ENST00000535112.1	LDHB	215
1725	chr10	100141479	100141787	309	Distal Intergenic	100154860	100186029	31170	10613	ENST00000370408.2	ERLIN1	44242
1726	chr22	36243897	36244637	741	Distal Intergenic	36226210	36239954	13745	23780	ENST00000249066.10	APOL2	-3943
1727	chr9	121041364	121041921	558	Intron (ENST00000223642.2/727, intron 3 of 40)	121025696	121034826	9131	727	ENST00000460578.1	C5	-6538
1728	chr4	118760632	118762422	1791	Intron (ENST00000280551.10/9871, intron 10 of 22)	118722830	118766563	43734	9871	ENST00000505134.5	SEC24D	4141
1729	chr4	99593958	99594298	341	Intron (ENST00000511045.5/4547, intron 6 of 17)	99574824	99584193	9370	4547	ENST00000422897.6	MTTP	19134
1730	chr13	112562107	112563390	1284	Intron (ENST00000261965.7/10426, intron 3 of 21)	112544556	112548172	3617	10426	ENST00000611152.1	TUBGCP3	-13935
1731	chr7	129208705	129209698	994	Promoter (<=1kb)	129210508	129212152	1645	6608	ENST00000475779.1	SMO	-810
1732	chr4	37962088	37962435	348	Promoter (1-2kb)	37960435	37961125	691	10744	ENST00000504686.1	PTTG2	1653
1733	chr7	96606505	96606747	243	Intron (ENST00000466986.5/7979, intron 2 of 3)	96622430	96645932	23503	7979	ENST00000616956.1	SEM1	39185
1734	chr14	88063236	88063539	304	Intron (ENST00000556033.5/283587, intron 2 of 3)	88018605	88036319	17715	101928791	ENST00000553921.1	LINC01147	-26917
1735	chr14	89500030	89501094	1065	Intron (ENST00000345097.8/1112, intron 1 of 6)	89412313	89494185	81873	1112	ENST00000553904.1	FOXN3	-5845
1736	chr17	14323277	14326899	3623	Intron (ENST00000466596.5/9953, intron 1 of 2)	14303854	14305505	1652	84815	ENST00000583262.1	MGC12916	19423
1737	chr1	200179348	200182307	2960	Distal Intergenic	200043810	200058424	14615	2494	ENST00000367357.3	NR5A2	135538
1738	chr9	23307990	23308232	243	Intron (ENST00000640003.1/ENST00000640003.1, intron 1 of 9)	23500691	23672387	171697	101929563	ENST00000640307.1	LOC101929563	364155
1739	chr5	172948146	172948514	369	Intron (ENST00000393784.7/57222, intron 9 of 9)	172958729	172969716	10988	51121	ENST00000519974.5	RPL26L1	-10215
1740	chr18	3386525	3386767	243	Distal Intergenic	3411608	3457684	46077	7050	ENST00000552383.5	TGIF1	-24841
1741	chr3	100326128	100327002	875	Distal Intergenic	100334701	100361635	26935	56954	ENST00000394140.8	NIT2	-7699
1742	chr1	13311337	13312315	979	Distal Intergenic	13315581	13322598	7018	653619	ENST00000376152.2	PRAMEF15	-3266
1743	chr7	113463362	113465035	1674	Distal Intergenic	113116718	113118613	1896	401397	ENST00000397764.7	SMIM30	-344749
1744	chr10	78653917	78654832	916	Intron (ENST00000421324.4/ENST00000421324.4, intron 2 of 2)	78943328	78962394	19067	283050	ENST00000428862.5	ZMIZ1-AS1	307562
1745	chr3	42743943	42744870	928	Intron (ENST00000446950.5/100874114, intron 3 of 3)	42713162	42733544	20383	152206	ENST00000472921.1	CCDC13	-10399
1746	chr15	62027706	62028072	367	Intron (ENST00000644861.1/54832, intron 6 of 84)	61852389	62060447	208059	54832	ENST00000644861.1	VPS13C	32375
1747	chr14	100647365	100650651	3287	Distal Intergenic	100657250	100672775	15526	283601	ENST00000556697.1	LINC00523	-6599
1748	chr7	40374014	40374256	243	Intron (ENST00000401647.6/79783, intron 8 of 12)	40274511	40388158	113648	79783	ENST00000488110.1	SUGCT	99503
1749	chr3	2842821	2843178	358	Intron (ENST00000427741.5/152330, intron 7 of 20)	2866420	2887224	20805	152330	ENST00000473058.1	CNTN4	-23242
1750	chr10	5056014	5056256	243	Intron (ENST00000605781.5/8644, intron 1 of 5)	5048812	5107503	58692	8644	ENST00000439082.7	AKR1C3	7202
1751	chr9	131467087	131468128	1042	Exon (ENST00000405995.5/84726, exon 13 of 31)	131473594	131474847	1254	84726	ENST00000456307.1	PRRC2B	-5466
1752	chr2	17762281	17766774	4494	Promoter (<=1kb)	17761396	17765144	3749	348654	ENST00000534669.1	GEN1	885
1753	chr7	1919324	1919566	243	Intron (ENST00000265854.11/8379, intron 15 of 16)	1898200	1940549	42350	8379	ENST00000437877.1	MAD1L1	20983
1754	chr4	186225916	186230220	4305	Promoter (<=1kb)	186226438	186236896	10459	3818	ENST00000428196.5	KLKB1	0
1755	chr11	11968411	11969085	675	Promoter (<=1kb)	11965850	11968746	2897	27122	ENST00000532372.5	DKK3	0
1756	chr11	14830711	14830953	243	Exon (ENST00000282096.8/5140, exon 8 of 16)	14788939	14819206	30268	5140	ENST00000525439.1	PDE3B	41772
1757	chr14	103700874	103701292	419	Promoter (<=1kb)	103699922	103701544	1623	3831	ENST00000556986.1	KLC1	952
1758	chr14	101781241	101782138	898	Intron (ENST00000422945.6/5527, intron 2 of 15)	101786111	101797701	11591	5527	ENST00000553554.1	PPP2R5C	-3973
1759	chr2	73041838	73042080	243	Promoter (2-3kb)	72988292	73044615	56324	94097	ENST00000464825.5	SFXN5	2535
1760	chr22	30031721	30032145	425	Intron (ENST00000429350.5/101929664, intron 3 of 4)	30022463	30025963	3501	8897	ENST00000491251.1	MTMR3	9258
1761	chr4	59696004	59696246	243	Distal Intergenic	59013573	59046959	33387	105377247	ENST00000509782.1	LINC02429	682431
1762	chr15	58399894	58400136	243	Intron (ENST00000558239.5/8854, intron 2 of 3)	58410569	58568873	158305	3990	ENST00000356113.10	LIPC	-10433
1763	chr14	35154378	35155147	770	Intron (ENST00000604948.5/9692, intron 4 of 7)	35122759	35273485	150727	9692	ENST00000557404.3	PRORP	31619
1764	chr19	55809038	55809381	344	Exon (ENST00000589824.6/204801, exon 2 of 8)	55785397	55818237	32841	204801	ENST00000589824.6	NLRP11	8856
1765	chr17	55756753	55757064	312	Intron (ENST00000268896.9/58488, intron 1 of 5)	55751400	55777374	25975	58488	ENST00000325214.10	PCTP	5353
1766	chr7	26357483	26357794	312	Promoter (2-3kb)	26360454	26374327	13874	29887	ENST00000619420.4	SNX10	-2660
1767	chr7	80413360	80413866	507	Intron (ENST00000435819.5/948, intron 1 of 16)	80373839	80391453	17615	101927269	ENST00000615960.4	LOC101927269	-21907
1768	chr11	117028533	117030084	1552	Intron (ENST00000445177.5/23387, intron 1 of 24)	116845593	117098271	252679	23387	ENST00000415541.5	SIK3	68187
1769	chr2	3527765	3528007	243	Distal Intergenic	3531990	3533370	1381	246243	ENST00000423704.1	RNASEH1	5363
1770	chr19	13994924	13996348	1425	Intron (ENST00000254325.8/5989, intron 1 of 20)	13983313	14006262	22950	5989	ENST00000588885.1	RFX1	9914
1771	chr1	165233708	165236387	2680	Intron (ENST00000342310.7/4009, intron 4 of 8)	165203408	165213280	9873	4009	ENST00000489443.2	LMX1A	-20428
1772	chr1	19266894	19267136	243	3' UTR	19270533	19271269	737	246181	ENST00000493176.1	AKR7L	4133
1773	chr9	109823183	109824765	1583	Intron (ENST00000374531.6/114299, intron 2 of 6)	109867031	109942773	75743	114299	ENST00000497711.1	PALM2	-42266
1774	chr6	26139080	26139322	243	3' UTR	26123356	26123926	571	8347	ENST00000396984.1	HIST1H2BC	-15154
1775	chr8	96780813	96781055	243	Intron (ENST00000220763.9/10404, intron 1 of 7)	96761240	96785287	24048	10404	ENST00000521142.1	CPQ	19573
1776	chr3	185350913	185356485	5573	Intron (ENST00000446828.5/9175, intron 2 of 12)	185363120	185489097	125978	9175	ENST00000265026.7	MAP3K13	-6635
1777	chr7	96507665	96508427	763	Intron (ENST00000466986.5/7979, intron 2 of 3)	96481626	96503523	21898	7979	ENST00000493858.5	SEM1	-4142
1778	chr1	204090700	204091030	331	Intron (ENST00000367203.8/9580, intron 1 of 6)	204078129	204116627	38499	9580	ENST00000528591.5	SOX13	12571
1779	chr17	1541683	1541925	243	Promoter (<=1kb)	1538439	1541599	3161	5306	ENST00000572004.1	PITPNA	-84
1780	chr5	14677989	14678591	603	Promoter (<=1kb)	14678756	14690151	11396	90268	ENST00000514913.1	OTULIN	-165
1781	chr18	6365196	6368606	3411	Promoter (<=1kb)	5954706	6367683	412978	91133	ENST00000400105.6	L3MBTL4	0
1782	chr15	66733770	66735259	1490	Intron (ENST00000288840.9/4091, intron 3 of 3)	66711697	66717537	5841	4091	ENST00000558937.1	SMAD6	22073
1783	chr9	117642833	117643762	930	Distal Intergenic	117648606	117657027	8422	101928797	ENST00000450938.1	LOC101928797	-4844
1784	chr1	204277121	204277540	420	Intron (ENST00000437919.1/ENST00000437919.1, intron 1 of 1)	204220756	204307395	86640	22874	ENST00000637508.1	PLEKHA6	29855
1785	chr16	77765731	77766187	457	Distal Intergenic	77788530	77980107	191578	57687	ENST00000302536.2	VAT1L	-22343
1786	chr1	91762751	91763853	1103	Promoter (2-3kb)	91727777	91766432	38656	7049	ENST00000468996.2	TGFBR3	2579
1787	chr6	77819973	77820313	341	Intron (ENST00000602452.3/101928601, intron 3 of 4)	77690656	77924759	234104	101928601	ENST00000649759.1	MEI4	129317
1788	chr5	68279648	68280534	887	Promoter (<=1kb)	68280240	68293346	13107	5295	ENST00000523807.5	PIK3R1	0
1789	chr4	32475289	32475594	306	Distal Intergenic	32351038	32353220	2183	101927363	ENST00000515181.1	LINC02353	124251
1790	chr4	87166098	87166966	869	Exon (ENST00000505836.1/ENST00000505836.1, exon 1 of 1)	87114943	87125277	10335	4299	ENST00000503369.1	AFF1	51155
1791	chr15	30503394	30504499	1106	Intron (ENST00000564861.1/100288203, intron 2 of 2)	30484544	30507623	23080	100288203	ENST00000564861.1	LOC100288203	18850
1792	chr7	95339095	95340087	993	Distal Intergenic	95297676	95324707	27032	5444	ENST00000222381.7	PON1	-14388
1793	chr3	138766586	138767717	1132	Intron (ENST00000477593.5/5291, intron 1 of 22)	138652699	138759359	106661	5291	ENST00000289153.6	PIK3CB	-7227
1794	chr1	204125987	204133557	7571	3' UTR	204122386	204123729	1344	9580	ENST00000525258.1	SOX13	3601
1795	chr6	141958820	141959124	305	Distal Intergenic	142075608	142088799	13192	4829	ENST00000258042.1	NMBR	129675
1796	chr16	9363282	9368415	5134	Intron (ENST00000564305.1/101927009, intron 1 of 2)	9355588	9408093	52506	101927009	ENST00000564305.1	LINC02177	7694
1797	chr17	7825515	7825757	243	Intron (ENST00000572933.5/146754, intron 77 of 85)	7839904	7845347	5444	23135	ENST00000571047.5	KDM6B	-14147
1798	chr2	164615399	164615719	321	Intron (ENST00000488342.5/2888, intron 2 of 13)	164525042	164619957	94916	2888	ENST00000424693.1	GRB14	4238
1799	chr13	100074210	100074519	310	Distal Intergenic	100086031	100088848	2818	105370333	ENST00000612598.1	LOC105370333	14329
1800	chr9	90063956	90066130	2175	Distal Intergenic	90020654	90041499	20846	286370	ENST00000426593.1	MIR4290HG	-22457
1801	chr15	80144456	80144861	406	Distal Intergenic	80152490	80168079	15590	2184	ENST00000558022.5	FAH	-7629
1802	chr6	69789304	69794627	5324	Promoter (<=1kb)	69675806	69792144	116339	55788	ENST00000647655.1	LMBRD1	0
1803	chr17	18129248	18129490	243	Intron (ENST00000615845.4/51168, intron 7 of 64)	18137841	18139611	1771	51168	ENST00000646238.1	MYO15A	-8351
1804	chr14	63999547	63999855	309	Intron (ENST00000357395.7/23224, intron 27 of 115)	64003024	64049279	46256	23224	ENST00000557005.1	SYNE2	-3169
1805	chr12	64627371	64627942	572	Intron (ENST00000637125.1/283349, intron 2 of 5)	64622509	64622605	97	100500856	ENST00000584743.3	MIR548Z	-4766
1806	chr11	66859364	66859750	387	Promoter (1-2kb)	66857502	66860475	2974	78999	ENST00000309602.4	LRFN4	1862
1807	chr7	29214122	29216504	2383	Intron (ENST00000644824.1/1124, intron 5 of 16)	29199540	29208970	9431	102724484	ENST00000446246.1	LOC102724484	-5152
1808	chr17	55529973	55531376	1404	Intron (ENST00000455347.1/ENST00000455347.1, intron 1 of 3)	55392613	55421992	29380	23531	ENST00000262065.7	MMD	-107981
1809	chr10	132387075	132387397	323	Distal Intergenic	132397168	132417528	20361	170394	ENST00000631148.2	PWWP2B	-9771
1810	chr1	11932138	11932380	243	Promoter (1-2kb)	11934205	11958620	24416	5351	ENST00000485046.5	PLOD1	-1825
1811	chr8	47836144	47836532	389	Exon (ENST00000314191.6/5591, exon 58 of 86)	47862369	47864792	2424	5591	ENST00000546304.1	PRKDC	28260
1812	chr8	73166690	73168211	1522	Distal Intergenic	73066532	73124088	57557	157869	ENST00000519697.1	SBSPON	-42602
1813	chr8	26812741	26813499	759	Intron (ENST00000380586.5/148, intron 1 of 2)	26770210	26854574	84365	148	ENST00000518621.1	ADRA1A	41075
1814	chr10	84367423	84368173	751	Intron (ENST00000372088.7/54462, intron 1 of 9)	84393853	84514405	120553	54462	ENST00000494144.5	CCSER2	-25680
1815	chr9	71955147	71955534	388	Intron (ENST00000479413.1/138241, intron 1 of 2)	71911802	71972843	61042	138241	ENST00000377027.1	C9orf85	43345
1816	chr19	48480292	48481237	946	3' UTR	48472721	48476276	3556	9266	ENST00000467412.1	CYTH2	7571
1817	chr8	70353292	70353534	243	Intron (ENST00000452400.6/10499, intron 1 of 22)	70112070	70402079	290010	10499	ENST00000518287.6	NCOA2	48545
1818	chr4	153559550	153559905	356	Intron (ENST00000409663.7/23240, intron 7 of 34)	153555896	153636711	80816	23240	ENST00000240487.5	TMEM131L	3654
1819	chr11	129223055	129225476	2422	Intron (ENST00000525234.1/9743, intron 1 of 6)	128965060	129192198	227139	9743	ENST00000310343.13	ARHGAP32	-30857
1820	chr6	135117715	135118153	439	Distal Intergenic	135002815	135103056	100242	10767	ENST00000529882.5	HBS1L	-14659
1821	chr17	18166415	18167027	613	Exon (ENST00000615845.4/51168, exon 60 of 65)	18161368	18178870	17503	51168	ENST00000578575.1	MYO15A	5047
1822	chr16	75105771	75106285	515	Promoter (<=1kb)	75104798	75108004	3207	84937	ENST00000568494.1	ZNRF1	973
1823	chr15	44898714	44899187	474	Distal Intergenic	44825747	44884694	58948	653381	ENST00000561384.3	SORD2P	-14020
1824	chr9	6905522	6906087	566	Intron (ENST00000536108.5/23081, intron 8 of 17)	6893123	6948214	55092	23081	ENST00000496464.1	KDM4C	12399
1825	chr10	124735551	124738011	2461	Intron (ENST00000494792.1/9679, intron 6 of 9)	124621671	124742970	121300	9679	ENST00000392754.7	FAM53B	4959
1826	chr2	225021993	225022385	393	Intron (ENST00000258390.11/55619, intron 1 of 55)	225010461	225010540	80	100616207	ENST00000583746.1	MIR4439	-11453
1827	chr2	21027732	21028038	307	Exon (ENST00000233242.5/338, exon 14 of 29)	21024170	21043962	19793	338	ENST00000399256.4	APOB	15924
1828	chr3	16896170	16896412	243	Intron (ENST00000460467.1/23228, intron 1 of 2)	16884959	17090594	205636	23228	ENST00000615277.4	PLCL2	11211
1829	chr2	217828684	217829124	441	Intron (ENST00000646520.1/7145, intron 22 of 32)	217802789	217842160	39372	7145	ENST00000446688.5	TNS1	13036
1830	chr9	14640567	14640873	307	Intron (ENST00000380916.8/340481, intron 7 of 9)	14677366	14693265	15900	340481	ENST00000497966.1	ZDHHC21	52392
1831	chr15	80852919	80853161	243	Intron (ENST00000220244.7/57214, intron 1 of 28)	80841978	80842073	96	693132	ENST00000385268.1	MIR549A	-10846
1832	chr9	17435805	17437625	1821	Intron (ENST00000380647.7/54875, intron 18 of 25)	17415818	17462984	47167	54875	ENST00000461247.1	CNTLN	19987
1833	chr6	166553024	166555783	2760	Intron (ENST00000265678.8/6196, intron 1 of 20)	166412659	166544690	132032	6196	ENST00000481261.6	RPS6KA2	-8334
1834	chr10	114484917	114489320	4404	Promoter (<=1kb)	114450079	114487993	37915	3983	ENST00000440467.5	ABLIM1	0
1835	chr6	118295311	118297441	2131	Intron (ENST00000360388.8/222553, intron 7 of 7)	118154442	118317676	163235	222553	ENST00000621341.1	SLC35F1	140869
1836	chr4	109850337	109851552	1216	Promoter (<=1kb)	109851330	109872315	20986	345193	ENST00000327908.3	LRIT3	0
1837	chr13	60448511	60448819	309	Intron (ENST00000196169.7/81550, intron 3 of 13)	60444687	60461040	16354	81550	ENST00000463109.2	TDRD3	3824
1838	chr1	206577638	206583544	5907	Promoter (<=1kb)	206583120	206586842	3723	83593	ENST00000605653.1	RASSF5	0
1839	chr15	44899542	44900240	699	Distal Intergenic	44825747	44884694	58948	653381	ENST00000561384.3	SORD2P	-14848
1840	chr3	21956879	21957816	938	Promoter (<=1kb)	21957136	21979828	22693	100874221	ENST00000436306.1	ZNF385D-AS2	0
1841	chr2	21074348	21074763	416	Distal Intergenic	21001429	21044073	42645	338	ENST00000233242.5	APOB	-30275
1842	chrX	41012504	41012982	479	Distal Intergenic	41085635	41232597	146963	8239	ENST00000378308.6	USP9X	-72653
1843	chr19	38980128	38982361	2234	Distal Intergenic	38941401	38975910	34510	115290	ENST00000292852.8	FBXO17	-4218
1844	chr10	131473224	131474221	998	Distal Intergenic	131092391	131311721	219331	256536	ENST00000368642.4	TCERG1L	-161503
1845	chr8	19330382	19332057	1676	Intron (ENST00000265807.7/63898, intron 2 of 9)	19319590	19361298	41709	63898	ENST00000523736.1	SH2D4A	10792
1846	chr18	79909524	79910245	722	Intron (ENST00000357575.8/80148, intron 4 of 4)	79903894	79915961	12068	80148	ENST00000590895.1	PQLC1	5716
1847	chr19	18395644	18397349	1706	Promoter (<=1kb)	18391149	18397611	6463	126364	ENST00000595840.1	LRRC25	262
1848	chr19	6220675	6220917	243	Intron (ENST00000252674.8/4298, intron 6 of 11)	6213120	6216968	3849	4298	ENST00000585588.1	MLLT1	-3707
1849	chr7	36807596	36807917	322	Distal Intergenic	36855367	36862150	6784	9844	ENST00000497024.1	ELMO1	54233
1850	chr12	123206262	123206504	243	Intron (ENST00000541076.6/10198, intron 6 of 21)	123194509	123202838	8330	10198	ENST00000606326.1	MPHOSPH9	-3424
1851	chr4	38784606	38792409	7804	Promoter (1-2kb)	38775836	38782990	7155	81793	ENST00000507953.1	TLR10	-1616
1852	chr1	145871917	145872737	821	Exon (ENST00000355594.8/148741, exon 10 of 14)	145854746	145859836	5091	10401	ENST00000393046.3	PIAS3	-12081
1853	chr16	24778804	24779561	758	Promoter (1-2kb)	24777248	24826227	48980	27327	ENST00000491718.5	TNRC6A	1556
1854	chr5	10287005	10287247	243	Intron (ENST00000296658.3/134147, intron 3 of 5)	10275875	10282288	6414	134147	ENST00000503834.1	CMBL	-4717
1855	chr1	99649694	99651566	1873	Intron (ENST00000263174.8/54873, intron 1 of 7)	99646342	99694368	48027	54873	ENST00000615664.1	PALMD	3352
1856	chr16	55782536	55782778	243	Intron (ENST00000421606.6/51716, intron 8 of 13)	55760642	55793960	33319	51716	ENST00000421606.6	CES1P1	21894
1857	chr7	41583789	41585462	1674	Distal Intergenic	41689516	41692564	3049	3624	ENST00000464515.1	INHBA	107102
1858	chr10	129529079	129529321	243	Intron (ENST00000306010.7/4255, intron 1 of 4)	129467262	129537164	69903	4255	ENST00000482547.1	MGMT	61817
1859	chr7	73605633	73605875	243	Promoter (<=1kb)	73596710	73606824	10115	51085	ENST00000476404.5	MLXIPL	949
1860	chr17	72937504	72937809	306	Intron (ENST00000255559.7/201266, intron 5 of 9)	72823698	72992932	169235	201266	ENST00000584129.1	SLC39A11	55123
1861	chrX	28139624	28140293	670	Distal Intergenic	27977993	27981449	3457	139425	ENST00000441525.3	DCAF8L1	-158175
1862	chr9	130791274	130791516	243	Intron (ENST00000372348.6/25, intron 1 of 10)	130835066	130887675	52610	25	ENST00000318560.5	ABL1	-43550
1863	chr16	16199771	16200419	649	Intron (ENST00000205557.11/368, intron 9 of 30)	16173082	16177521	4440	368	ENST00000576683.1	ABCC6	-22250
1864	chr3	52166375	52167286	912	Distal Intergenic	52075286	52154690	79405	25886	ENST00000394970.6	POC1A	-11685
1865	chr8	26698810	26701399	2590	Distal Intergenic	26637530	26643522	5993	1808	ENST00000474808.1	DPYSL2	61280
1866	chr18	49625577	49626362	786	Distal Intergenic	49562345	49567763	5419	9388	ENST00000579750.1	LIPG	63232
1867	chr8	22928228	22928993	766	Promoter (<=1kb)	22713251	22927908	214658	157310	ENST00000256404.7	PEBP4	-320
1868	chrX	124797152	124797394	243	Intron (ENST00000371130.7/10178, intron 3 of 30)	124375903	124963817	587915	10178	ENST00000371130.7	TENM1	166423
1869	chr8	101231976	101232347	372	Distal Intergenic	101201716	101206193	4478	51123	ENST00000520454.1	ZNF706	-25783
1870	chr5	52887434	52889441	2008	Exon (ENST00000282588.6/3672, exon 8 of 29)	52901779	52952512	50734	3672	ENST00000504669.5	ITGA1	-12338
1871	chr4	186829268	186831016	1749	Distal Intergenic	186708363	186726722	18360	2195	ENST00000509647.1	FAT1	-102546
1872	chr12	51749221	51749851	631	Promoter (1-2kb)	51751377	51786771	35395	6334	ENST00000548086.2	SCN8A	-1526
1873	chr7	40467372	40471698	4327	Intron (ENST00000401647.6/79783, intron 10 of 12)	40274511	40388158	113648	79783	ENST00000488110.1	SUGCT	192861
1874	chr5	158436708	158437012	305	Intron (ENST00000517595.1/ENST00000517595.1, intron 1 of 1)	158320683	158409773	89091	101927697	ENST00000619068.1	LINC02227	-26935
1875	chrX	17003721	17007540	3820	Exon (ENST00000357277.7/9185, exon 2 of 18)	16947070	17022371	75302	9185	ENST00000481792.1	REPS2	56651
1876	chr1	2292574	2293283	710	Intron (ENST00000378536.4/6497, intron 1 of 6)	2303646	2304368	723	6497	ENST00000507179.1	SKI	-10363
1877	chr10	30081439	30081919	481	Intron (ENST00000465712.1/57608, intron 1 of 2)	30012800	30059524	46725	57608	ENST00000375377.1	JCAD	-21915
1878	chr8	9481273	9481648	376	Distal Intergenic	9555914	9710409	154496	8658	ENST00000520408.5	TNKS	-74266
1879	chr10	88093797	88094110	314	Distal Intergenic	87952199	87961309	9111	5728	ENST00000472832.2	PTEN	141598
1880	chr1	16585597	16586342	746	Exon (ENST00000430580.6/55672, exon 12 of 29)	16564853	16604934	40082	55672	ENST00000392963.5	NBPF1	18592
1881	chr18	62859926	62860736	811	Exon (ENST00000262719.9/23239, exon 4 of 17)	62832174	62895088	62915	23239	ENST00000487409.1	PHLPP1	27752
1882	chr4	152377971	152378213	243	Intron (ENST00000603548.6/55294, intron 2 of 11)	152321258	152382529	61272	55294	ENST00000296555.10	FBXW7	4316
1883	chr11	34292241	34293322	1082	Intron (ENST00000435224.2/25841, intron 1 of 16)	34173174	34242545	69372	25841	ENST00000530814.1	ABTB2	-49696
1884	chr7	40465211	40465514	304	Intron (ENST00000401647.6/79783, intron 10 of 12)	40274511	40388158	113648	79783	ENST00000488110.1	SUGCT	190700
1885	chr17	36580675	36580981	307	Intron (ENST00000613102.4/79893, intron 8 of 13)	36576657	36586153	9497	79893	ENST00000619573.1	GGNBP2	4018
1886	chr16	76888147	76888389	243	Intron (ENST00000567777.1/ENST00000567777.1, intron 1 of 2)	76868936	76869019	84	100616172	ENST00000585233.1	MIR4719	19211
1887	chr1	44297172	44299197	2026	Intron (ENST00000456170.6/79033, intron 3 of 6)	44221070	44319744	98675	79033	ENST00000456170.6	ERI3	20547
1888	chr10	4666635	4667220	586	Intron (ENST00000430998.6/100216001, intron 1 of 3)	4651103	4656800	5698	100216001	ENST00000443994.1	MANCR	-9835
1889	chr15	81272371	81272613	243	Intron (ENST00000560241.5/3603, intron 5 of 12)	81278878	81306548	27671	3603	ENST00000560115.5	IL16	-6265
1890	chr16	87977905	87978147	243	Promoter (2-3kb)	87980535	87984227	3693	54971	ENST00000474563.2	BANP	-2388
1891	chr17	31880135	31881062	928	Exon (ENST00000261708.8/55813, exon 11 of 19)	31863349	31873948	10600	55813	ENST00000484661.1	UTP6	-6187
1892	chr15	56453394	56453712	319	Intron (ENST00000260453.3/55329, intron 3 of 9)	56463780	56465085	1306	55329	ENST00000558694.1	MNS1	11373
1893	chr12	26455430	26456769	1340	Intron (ENST00000381340.7/3709, intron 45 of 56)	26411213	26427937	16725	3709	ENST00000538984.1	ITPR2	-27493
1894	chr10	78425672	78426777	1106	Intron (ENST00000634930.1/ENST00000634930.1, intron 1 of 3)	78267442	78330595	63154	414243	ENST00000459633.1	LINC00595	158230
1895	chr2	233664936	233675801	10866	Promoter (<=1kb)	233671853	233773300	101448	54600	ENST00000354728.4	UGT1A9	0
1896	chr2	157774269	157774591	323	Intron (ENST00000263640.7/90, intron 5 of 10)	157778150	157790237	12088	90	ENST00000487456.1	ACVR1	15646
1897	chr1	62868228	62870128	1901	Distal Intergenic	62821183	62835529	14347	84938	ENST00000414558.2	ATG4C	47045
1898	chr3	191306960	191307341	382	Intron (ENST00000340524.9/257313, intron 3 of 8)	191277591	191316218	38628	257313	ENST00000463450.1	UTS2B	8877
1899	chr2	68907465	68910460	2996	Distal Intergenic	68865481	68871517	6037	27302	ENST00000295379.1	BMP10	-35948
1900	chr6	18209331	18210862	1532	Promoter (<=1kb)	18211495	18223848	12354	221656	ENST00000642162.1	KDM1B	-633
1901	chr10	72567038	72568029	992	Intron (ENST00000398761.8/10367, intron 1 of 11)	72367340	72551198	183859	10367	ENST00000476605.7	MICU1	-15840
1902	chr12	62270899	62271408	510	Intron (ENST00000353364.7/9958, intron 1 of 20)	62278628	62321569	42942	9958	ENST00000548836.1	USP15	-7220
1903	chr3	100541081	100542331	1251	Intron (ENST00000323523.8/55076, intron 1 of 5)	100519239	100556972	37734	55076	ENST00000462884.1	TMEM45A	21842
1904	chr9	63329075	63329466	392	Intron (ENST00000647845.1/441432, intron 10 of 11)	63317067	63333091	16025	375719	ENST00000412626.2	AQP7P1	3625
1905	chr14	105337914	105338746	833	Promoter (1-2kb)	105336425	105367250	30826	23241	ENST00000546915.1	PACS2	1489
1906	chr3	15364404	15364940	537	Distal Intergenic	15255650	15341368	85719	9467	ENST00000408919.7	SH3BP5	-23036
1907	chr6	106687323	106695631	8309	Promoter (<=1kb)	106695535	106699994	4460	105377926	ENST00000424162.1	LINC02526	0
1908	chr3	174495342	174496047	706	Intron (ENST00000482228.5/ENST00000482228.5, intron 1 of 1)	174440987	175097142	656156	254827	ENST00000434257.1	NAALADL2	54355
1909	chr12	31536322	31536564	243	Intron (ENST00000389082.9/160518, intron 1 of 20)	31451702	31495902	44201	160518	ENST00000546299.1	DENND5B	-40420
1910	chr11	128707547	128707789	243	Intron (ENST00000608303.5/2313, intron 1 of 6)	128691672	128696023	4352	100507392	ENST00000526269.2	SENCR	-11524
1911	chr11	35275085	35277738	2654	Intron (ENST00000278379.8/6506, intron 9 of 10)	35254696	35286918	32223	6506	ENST00000647076.1	SLC1A2	9180
1912	chr19	38767170	38767412	243	Promoter (2-3kb)	38730431	38769904	39474	147968	ENST00000601953.5	CAPN12	2492
1913	chr6	165774720	165775295	576	Exon (ENST00000435810.1/ENST00000435810.1, exon 2 of 2)	165331050	165663245	332196	10846	ENST00000539869.3	PDE10A	-111475
1914	chr14	72915643	72917110	1468	Distal Intergenic	72926332	72959121	32790	26094	ENST00000358377.6	DCAF4	-9222
1915	chr1	56943984	56944770	787	Intron (ENST00000371237.8/732, intron 7 of 11)	56931594	56933381	1788	732	ENST00000465658.1	C8B	-10603
1916	chr3	67936498	67942219	5722	Intron (ENST00000482677.5/101927111, intron 6 of 6)	68004216	68545625	541410	407738	ENST00000478136.5	TAFA1	-61997
1917	chr2	63805408	63805650	243	Intron (ENST00000490935.5/51057, intron 2 of 7)	63484604	63827843	343240	51057	ENST00000490935.5	WDPCP	22193
1918	chr8	80551020	80551262	243	Distal Intergenic	80486307	80520135	33829	65986	ENST00000610895.2	ZBTB10	64713
1919	chr8	26757002	26757830	829	3' UTR	26770210	26854574	84365	148	ENST00000518621.1	ADRA1A	96744
1920	chr12	46825563	46826370	808	Promoter (<=1kb)	46764761	46825997	61237	55089	ENST00000447411.5	SLC38A4	0
1921	chr1	143738596	143738838	243	Exon (ENST00000443018.2/ENST00000443018.2, exon 2 of 2)	143729407	143729570	164	26871	ENST00000384010.1	RNU1-1	-9026
1922	chr2	63668095	63669159	1065	Intron (ENST00000490935.5/51057, intron 3 of 7)	63605810	63607194	1385	4190	ENST00000495083.1	MDH1	62285
1923	chr12	51677694	51678160	467	Intron (ENST00000638820.1/6334, intron 2 of 11)	51686423	51745948	59526	6334	ENST00000551216.2	SCN8A	-8263
1924	chr3	170467456	170467997	542	Promoter (<=1kb)	170467282	170755208	287927	101928583	ENST00000480067.1	SLC7A14-AS1	174
1925	chr15	100170379	100171181	803	Intron (ENST00000268070.8/170691, intron 8 of 21)	100051568	100109107	57540	170691	ENST00000568565.1	ADAMTS17	-61272
1926	chr2	27689731	27690128	398	Promoter (1-2kb)	27691558	27694973	3416	22950	ENST00000492196.1	SLC4A1AP	-1430
1927	chr11	57555263	57556980	1718	Intron (ENST00000340573.8/9246, intron 2 of 3)	57552272	57560516	8245	9246	ENST00000528275.1	UBE2L6	3536
1928	chr16	20470246	20470565	320	Promoter (1-2kb)	20471587	20474223	2637	123876	ENST00000572921.1	ACSM2A	-1022
1929	chr2	119743679	119745395	1717	Distal Intergenic	119759631	119983818	224188	5775	ENST00000263708.6	PTPN4	-14236
1930	chr11	57608919	57609161	243	Promoter (2-3kb)	57611231	57614529	3299	710	ENST00000530113.1	SERPING1	-2070
1931	chr10	88099536	88099778	243	Distal Intergenic	87952199	87961309	9111	5728	ENST00000472832.2	PTEN	147337
1932	chr12	102462547	102466487	3941	Exon (ENST00000635615.1/ENST00000635615.1, exon 6 of 6)	102402459	102478651	76193	3479	ENST00000424202.6	IGF1	12164
1933	chr7	73640800	73641417	618	Distal Intergenic	73597645	73624543	26899	51085	ENST00000453275.1	MLXIPL	-16257
1934	chr5	175060430	175060672	243	Distal Intergenic	174919082	174995513	76432	441116	ENST00000377300.3	LINC01951	-64917
1935	chr13	49257294	49258924	1631	Intron (ENST00000251108.10/81602, intron 3 of 9)	49248048	49265926	17879	81602	ENST00000429346.1	CDADC1	9246
1936	chr4	108772244	108773295	1052	Distal Intergenic	108752974	108763054	10081	64850	ENST00000509402.1	ETNPPL	-9190
1937	chr6	2103724	2104325	602	Intron (ENST00000530927.5/2762, intron 4 of 10)	1930107	2043433	113327	2762	ENST00000530459.1	GMDS	-60291
1938	chr2	170029235	170030045	811	3' UTR	170014803	170084131	69329	130507	ENST00000474426.1	UBR3	14432
1939	chr17	67813235	67813873	639	Distal Intergenic	67825524	67945891	120368	2186	ENST00000544778.6	BPTF	-11651
1940	chr9	125219724	125219966	243	Intron (ENST00000259460.12/10244, intron 4 of 7)	125200605	125220658	20054	10244	ENST00000416065.1	RABEPK	19119
1941	chr3	197473469	197474178	710	Distal Intergenic	197505262	197506986	1725	100129516	ENST00000608206.1	LINC02012	32808
1942	chr9	109826602	109826844	243	Intron (ENST00000374531.6/114299, intron 2 of 6)	109867031	109942773	75743	114299	ENST00000497711.1	PALM2	-40187
1943	chr5	94623727	94624603	877	Intron (ENST00000265140.9/84250, intron 1 of 20)	94628882	94665926	37045	84250	ENST00000466957.1	SLF1	-4279
1944	chr1	196975299	196981506	6208	Promoter (<=1kb)	196977556	197009674	32119	81494	ENST00000256785.4	CFHR5	0
1945	chr5	172922534	172923027	494	Promoter (<=1kb)	172922145	172932511	10367	57222	ENST00000521392.5	ERGIC1	389
1946	chr22	30034028	30034416	389	Intron (ENST00000429350.5/101929664, intron 3 of 4)	30022463	30025963	3501	8897	ENST00000491251.1	MTMR3	11565
1947	chr7	151741832	151761674	19843	Intron (ENST00000287878.8/51422, intron 3 of 15)	151556161	151736314	180154	51422	ENST00000492843.5	PRKAG2	-5518
1948	chr9	130037135	130037439	305	Intron (ENST00000446176.6/23048, intron 1 of 16)	129887187	130043162	155976	23048	ENST00000446176.6	FNBP1	5723
1949	chr17	39058812	39059054	243	Promoter (1-2kb)	39057052	39112239	55188	100131347	ENST00000578423.1	RDM1P5	1760
1950	chr21	38250453	38251726	1274	Intron (ENST00000549158.5/3772, intron 2 of 5)	38256698	38301822	45125	3772	ENST00000612702.4	KCNJ15	-4972
1951	chr3	140384847	140385214	368	Intron (ENST00000458420.7/64084, intron 2 of 16)	140505611	140508789	3179	101927808	ENST00000513309.1	CLSTN2-AS1	123575
1952	chr14	105737348	105737904	557	3' UTR	105640168	105640232	65	102466889	ENST00000616772.1	MIR8071-2	97180
1953	chr14	60816839	60817215	377	Intron (ENST00000261245.8/4331, intron 5 of 7)	60811987	60968680	156694	4331	ENST00000557134.1	MNAT1	4852
1954	chr7	8174851	8175393	543	Intron (ENST00000402384.7/3382, intron 6 of 13)	8141765	8157764	16000	3382	ENST00000470696.1	ICA1	-17087
1955	chr21	29365837	29366289	453	Intron (ENST00000422809.5/571, intron 2 of 4)	29370623	29373302	2680	100874322	ENST00000608072.1	BACH1-IT2	-4334
1956	chr3	39794560	39796891	2332	Distal Intergenic	39808914	40258166	449253	25924	ENST00000444716.5	MYRIP	-12023
1957	chr1	186202238	186202480	243	Distal Intergenic	186171387	186189665	18279	83872	ENST00000414277.1	HMCN1	30851
1958	chr9	18002529	18004778	2250	Intron (ENST00000636209.1/92949, intron 1 of 3)	17906563	18533292	626730	92949	ENST00000636209.1	ADAMTSL1	95966
1959	chr18	13184567	13185156	590	Intron (ENST00000593121.1/ENST00000593121.1, intron 1 of 1)	13217498	13387577	170080	753	ENST00000590371.5	LDLRAD4	-32342
1960	chr11	69357718	69357960	243	Intron (ENST00000544781.5/ENST00000544781.5, intron 2 of 2)	69294174	69295662	1489	26579	ENST00000540760.1	MYEOV	63544
1961	chr7	63900367	63901400	1034	Exon (ENST00000450544.1/ENST00000450544.1, exon 1 of 4)	63998874	64016130	17257	100419780	ENST00000330020.4	ZNF722P	-97474
1962	chrX	67569218	67570468	1251	Promoter (<=1kb)	67568889	67724288	155400	367	ENST00000396043.2	AR	329
1963	chr4	26751306	26751721	416	Intron (ENST00000264866.8/55296, intron 19 of 20)	26857678	27002228	144551	57620	ENST00000494628.6	STIM2	-105957
1964	chr3	96299838	96302005	2168	Distal Intergenic	96359964	96360039	76	102465864	ENST00000615894.1	MIR8060	-57959
1965	chr3	126300534	126302260	1727	Distal Intergenic	126352675	126354285	1611	28999	ENST00000509675.1	KLF15	52025
1966	chr4	53643990	53645874	1885	Intron (ENST00000507166.5/5156, intron 12 of 23)	53573955	53652477	78523	84708	ENST00000507168.5	LNX1	6603
1967	chr12	93844399	93845277	879	Intron (ENST00000549615.5/8738, intron 3 of 3)	93848660	93850756	2097	8738	ENST00000548330.1	CRADD	-3383
1968	chr5	53437778	53438365	588	Distal Intergenic	53480409	53487134	6726	10468	ENST00000256759.7	FST	-42044
1969	chr22	29906069	29906439	371	Intron (ENST00000401950.6/8897, intron 1 of 19)	29883269	29991669	108401	8897	ENST00000415511.1	MTMR3	22800
1970	chr7	111191784	111192525	742	Intron (ENST00000405709.6/83943, intron 3 of 5)	111091094	111097316	6223	54674	ENST00000464835.1	LRRN3	100690
1971	chr8	48239569	48239871	303	Distal Intergenic	48049580	48061315	11736	7336	ENST00000521628.1	UBE2V2	189989
1972	chr7	2692042	2696142	4101	Intron (ENST00000312371.8/155185, intron 1 of 6)	2688202	2713100	24899	155185	ENST00000407112.1	AMZ1	3840
1973	chr18	31751153	31751547	395	Distal Intergenic	31759562	31760880	1319	147407	ENST00000269205.5	SLC25A52	9333
1974	chr10	11526989	11529190	2202	Exon (ENST00000609104.5/9712, exon 3 of 15)	11460510	11532275	71766	9712	ENST00000277575.5	USP6NL	3085
1975	chr4	159534964	159535276	313	Distal Intergenic	159352457	159353569	1113	9693	ENST00000509891.1	RAPGEF2	182507
1976	chr15	90664688	90666315	1628	Exon (ENST00000500496.2/101929765, exon 3 of 3)	90660739	90664686	3948	101929765	ENST00000559473.1	LINC01585	3949
1977	chr10	94984657	94985192	536	Intron (ENST00000260682.7/1559, intron 7 of 8)	94941919	94949535	7617	1559	ENST00000473496.1	CYP2C9	42738
1978	chr3	45838325	45839712	1388	Promoter (2-3kb)	45830946	45841860	10915	54585	ENST00000490463.5	LZTFL1	2148
1979	chr20	51409703	51410083	381	Intron (ENST00000371564.7/4773, intron 9 of 10)	51391409	51399219	7811	4773	ENST00000496054.1	NFATC2	-10484
1980	chr12	21683736	21684044	309	Intron (ENST00000541860.1/ENST00000541860.1, intron 1 of 1)	21654355	21657971	3617	3945	ENST00000544151.1	LDHB	-25765
1981	chr2	61908928	61909170	243	Intron (ENST00000472729.1/150684, intron 1 of 2)	61905758	62000847	95090	150684	ENST00000455659.1	COMMD1	3170
1982	chr1	237953811	237954053	243	Distal Intergenic	237877864	237890922	13059	57829	ENST00000611898.4	ZP4	-62889
1983	chr12	21865271	21865997	727	Intron (ENST00000539874.1/ENST00000539874.1, intron 2 of 3)	21805174	21910978	105805	10060	ENST00000544039.5	ABCC9	44981
1984	chr9	87358669	87360638	1970	Distal Intergenic	87497228	87708631	211404	1612	ENST00000358077.9	DAPK1	-136590
1985	chr21	15119131	15119373	243	Distal Intergenic	14988141	15065936	77796	8204	ENST00000637630.1	NRIP1	-53195
1986	chr20	13230376	13230682	307	Intron (ENST00000262487.4/140862, intron 1 of 5)	13221771	13300651	78881	140862	ENST00000262487.4	ISM1	8605
1987	chr9	14217770	14218942	1173	Intron (ENST00000380959.7/4781, intron 2 of 8)	14081843	14180802	98960	4781	ENST00000543693.5	NFIB	-36968
1988	chr2	122611060	122611763	704	Distal Intergenic	123066151	123073481	7331	107985818	ENST00000432894.1	LINC01826	461718
1989	chr7	11235755	11235997	243	Intron (ENST00000625468.2/ENST00000625468.2, intron 3 of 4)	11110981	11169623	58643	9678	ENST00000473050.1	PHF14	124774
1990	chr11	95589667	95590234	568	Intron (ENST00000648353.1/ENST00000648353.1, intron 3 of 4)	95775854	95779204	3351	143684	ENST00000541418.1	FAM76B	188970
1991	chr2	113279018	113279260	243	Promoter (<=1kb)	113215997	113278950	62954	7849	ENST00000429538.7	PAX8	-68
1992	chr7	151675231	151675828	598	Exon (ENST00000287878.8/51422, exon 4 of 16)	151568737	151633165	64429	51422	ENST00000476632.1	PRKAG2	-42066
1993	chr4	186731187	186732133	947	Distal Intergenic	186708363	186726722	18360	2195	ENST00000509647.1	FAT1	-4465
1994	chr5	42623389	42623631	243	Intron (ENST00000230882.8/2690, intron 2 of 9)	42565864	42721878	156015	2690	ENST00000622294.2	GHR	57525
1995	chr9	133505681	133511321	5641	Distal Intergenic	133514586	133524946	10361	389827	ENST00000339996.3	MYMK	13625
1996	chr9	127997758	127998706	949	Distal Intergenic	127940579	127980513	39935	399665	ENST00000373095.5	FAM102A	-17245
1997	chr2	100923318	100925837	2520	Promoter (<=1kb)	100925146	100964176	39031	4862	ENST00000486017.5	NPAS2	0
1998	chr4	141338352	141339054	703	Distal Intergenic	141323471	141332618	9148	100507639	ENST00000511213.1	LINC02432	-5734
[truncated: 22,814 more rows]
