# Supplementary material for: Generation of functional hepatocytes by forward programming with nuclear receptors
Source: eLife. 2022 Aug 12;11:e71591. doi: 10.7554/eLife.71591 (PMC9374437; doi:10.7554/eLife.71591)
Supplement: Figure 3—source data 2. [file elife-71591-fig3-data2.xlsx]

## Sheet: Supplementary_Table3_HLC-unique
Source data 2. Peak annotation results for HLC-unique H3K27ac regions
	seqnames	start	end	width	annotation	gene Start	gene End	gene Length	gene ID	transcript ID	symbol	distance To TSS
1	chr4	152708224	152709683	1460	Distal Intergenic	152618632	152680165	61534	201799	ENST00000304385.7	TMEM154	-28059
2	chr1	42934111	42944641	10531	Promoter (<=1kb)	42926796	42943238	16443	6513	ENST00000475162.3	SLC2A1	0
3	chr9	42462542	42463030	489	Distal Intergenic	42566993	42569310	2318	103908605	ENST00000428895.1	LOC103908605	106280
4	chr17	4853916	4855064	1149	Intron (ENST00000355280.10/50488, intron 1 of 31)	4833621	4885965	52345	50488	ENST00000577021.1	MINK1	20295
5	chr1	94730489	94731246	758	Promoter (1-2kb)	94672897	94732345	59449	101928079	ENST00000432162.5	SLC44A3-AS1	1099
6	chr2	71746994	71748425	1432	Distal Intergenic	71610779	71644033	33255	8291	ENST00000468173.1	DYSF	136215
7	chr3	55873541	55874537	997	Intron (ENST00000288221.10/26059, intron 14 of 17)	55852492	55852594	103	100500875	ENST00000582157.1	MIR3938	-20947
8	chr5	131150448	131150977	530	Distal Intergenic	131162478	131162627	150	3094	ENST00000520028.1	HINT1	11650
9	chr1	31690203	31690502	300	Promoter (<=1kb)	31685682	31689968	4287	1307	ENST00000529928.1	COL16A1	-235
10	chr1	10010973	10011609	637	Intron (ENST00000315901.4/116362, intron 4 of 4)	9997216	10016020	18805	116362	ENST00000294435.7	RBP7	13757
11	chr3	29353440	29353972	533	Intron (ENST00000635992.1/152098, intron 8 of 13)	29264194	29290726	26533	100873979	ENST00000413430.1	RBMS3-AS3	-62714
12	chr1	79695772	79696041	270	Distal Intergenic	78889764	79006718	116955	64123	ENST00000370742.3	ADGRL4	-689054
13	chr3	23735169	23736243	1075	Distal Intergenic	23805903	23891316	85414	7324	ENST00000306627.7	UBE2E1	-69660
14	chr5	170279322	170280095	774	Intron (ENST00000046794.9/3937, intron 3 of 20)	170256557	170267327	10771	3937	ENST00000520344.1	LCP2	-11995
15	chr1	57887455	57887776	322	Intron (ENST00000485760.5/1600, intron 5 of 20)	57826071	57884085	58015	1600	ENST00000477280.1	DAB1	-3370
16	chr5	176438281	176440943	2663	Exon (ENST00000623948.1/ENST00000623948.1, exon 1 of 1)	176447628	176486427	38800	23197	ENST00000510730.5	FAF2	-6685
17	chr8	121669022	121669401	380	Intron (ENST00000648171.1/594842, intron 5 of 8)	121641436	121644693	3258	594842	ENST00000520043.1	HAS2-AS1	27586
18	chr6	15870480	15870756	277	Distal Intergenic	15522843	15663058	140216	84062	ENST00000513680.5	DTNBP1	-207422
19	chrX	121101646	121102803	1158	Distal Intergenic	121047588	121050080	2493	2747	ENST00000328078.2	GLUD2	54058
20	chr7	39634009	39634612	604	Intron (ENST00000005257.6/5898, intron 1 of 4)	39623886	39690570	66685	5898	ENST00000436179.1	RALA	10123
21	chr5	8769849	8770185	337	Distal Intergenic	8839732	8881240	41509	101929284	ENST00000510229.1	LINC02199	-69547
22	chr1	115771440	115771988	549	Promoter (2-3kb)	115700007	115768781	68775	845	ENST00000261448.5	CASQ2	-2659
23	chr9	32135343	32137815	2473	Distal Intergenic	32384603	32450832	66230	48	ENST00000541043.5	ACO1	-246788
24	chr19	46780403	46781643	1241	Intron (ENST00000542575.6/6510, intron 4 of 7)	46777211	46784786	7576	6510	ENST00000593713.1	SLC1A5	3143
25	chr6	161407865	161408241	377	Intron (ENST00000366898.5/5071, intron 9 of 11)	161130025	161274061	144037	56895	ENST00000320285.8	AGPAT4	-133804
26	chr3	167908209	167908890	682	Intron (ENST00000636485.1/646168, intron 10 of 14)	167903398	167922642	19245	646168	ENST00000469060.5	LRRC77P	4811
27	chr11	75632503	75635903	3401	Exon (ENST00000530435.1/ENST00000530435.1, exon 2 of 2)	75602860	75668434	65575	4135	ENST00000434603.2	MAP6	32531
28	chr11	106390842	106392724	1883	Distal Intergenic	106251407	106264905	13499	101928535	ENST00000525797.1	LOC101928535	139435
29	chr13	34461718	34465509	3792	Intron (ENST00000605909.1/105370158, intron 2 of 3)	34533846	34534350	505	100874179	ENST00000428706.1	LINC00457	68841
30	chrX	65241280	65241494	215	Distal Intergenic	65366638	65499310	132673	340554	ENST00000617377.1	ZC3H12B	-125144
31	chr13	77875784	77877451	1668	Distal Intergenic	77898192	77903568	5377	1910	ENST00000645696.1	EDNRB	26117
32	chr6	115716515	115718138	1624	Distal Intergenic	115633542	115634191	650	105377962	ENST00000446525.1	LINC02534	-82324
33	chr16	81066958	81067853	896	Intron (ENST00000640345.1/2653, intron 4 of 5)	81063754	81077078	13325	123775	ENST00000565253.1	C16orf46	9225
34	chr8	63232012	63232390	379	Distal Intergenic	63187530	63189042	1513	253943	ENST00000518373.1	YTHDF3	44482
35	chr15	68643552	68643766	215	Intron (ENST00000566799.5/10391, intron 1 of 11)	68631988	68727803	95816	10391	ENST00000543950.2	CORO2B	11564
36	chr9	76441285	76442506	1222	Promoter (<=1kb)	76441666	76507414	65749	2650	ENST00000442371.5	GCNT1	0
37	chr1	186762264	186763787	1524	Distal Intergenic	186828953	186988981	160029	5321	ENST00000367466.3	PLA2G4A	-65166
38	chr15	40252306	40253619	1314	Promoter (<=1kb)	40252548	40265974	13427	56924	ENST00000559617.5	PAK6	0
39	chr13	81102242	81102592	351	Distal Intergenic	81043670	81044442	773	103724386	ENST00000456588.1	LINC00377	58572
40	chr17	10458942	10461090	2149	Exon (ENST00000255381.2/4622, exon 12 of 40)	10443290	10469559	26270	4622	ENST00000255381.2	MYH4	8469
41	chr1	180588990	180589742	753	Distal Intergenic	180558976	180566518	7543	148756	ENST00000442621.1	OVAAL	30014
42	chr4	148784879	148785310	432	Distal Intergenic	148940949	148941777	829	105377480	ENST00000512989.1	LOC105377480	156467
43	chr5	132798936	132800120	1185	Intron (ENST00000371493.7/23176, intron 1 of 3)	132763824	132807241	43418	23176	ENST00000371493.7	SEPTIN8	7121
44	chr5	36458678	36459176	499	Distal Intergenic	36606355	36688332	81978	6507	ENST00000612708.4	SLC1A3	-147179
45	chr20	48156903	48157117	215	Distal Intergenic	47980488	47988744	8257	101927457	ENST00000428999.1	LINC01522	-168159
46	chr14	71381637	71383284	1648	Intron (ENST00000553453.5/26037, intron 2 of 5)	71398337	71398407	71	319139	ENST00000384713.1	SNORD56B	-15053
47	chr8	141276144	141277739	1596	Intron (ENST00000520137.1/57210, intron 1 of 3)	141254565	141256817	2253	105375787	ENST00000518520.1	LOC105375787	21579
48	chr7	108357227	108360888	3662	Intron (ENST00000379028.7/4897, intron 2 of 32)	108232417	108328655	96239	4897	ENST00000456431.5	NRCAM	-28572
49	chr5	19240557	19240829	273	Distal Intergenic	19472951	19478636	5686	1016	ENST00000510297.1	CDH18	237807
50	chr9	14881929	14882758	830	Intron (ENST00000422223.6/158326, intron 2 of 37)	14737396	14910430	173035	158326	ENST00000380880.3	FREM1	27672
51	chr22	36542270	36542590	321	Distal Intergenic	36510850	36529436	18587	8664	ENST00000216190.12	EIF3D	-12834
52	chr11	117198682	117199093	412	Promoter (<=1kb)	117199321	117204557	5237	6876	ENST00000392951.8	TAGLN	-228
53	chrX	128751270	128755261	3992	Distal Intergenic	128050962	128052398	1437	139741	ENST00000371124.4	ACTRT1	-698872
54	chrX	37926950	37927441	492	Intron (ENST00000465127.1/7102, intron 3 of 8)	37990817	37991317	501	25763	ENST00000341016.4	HYPM	-63376
55	chr9	113011779	113012864	1086	Promoter (<=1kb)	112973150	113012195	39046	169834	ENST00000639196.1	ZNF883	0
56	chr12	93880624	93880919	296	Intron (ENST00000548483.5/8738, intron 2 of 2)	93848660	93850756	2097	8738	ENST00000548330.1	CRADD	31964
57	chr7	4235995	4236209	215	Intron (ENST00000404826.6/221935, intron 41 of 44)	4232887	4237671	4785	221935	ENST00000467827.1	SDK1	3108
58	chr11	104005054	104005461	408	Intron (ENST00000393158.6/80310, intron 1 of 6)	104036580	104039188	2609	414301	ENST00000302259.4	DDI1	-31119
59	chr2	62678825	62679594	770	Intron (ENST00000405015.7/23301, intron 1 of 22)	62673878	62858416	184539	23301	ENST00000449820.5	EHBP1	4947
60	chrX	68460825	68463260	2436	Distal Intergenic	68432931	68433913	983	4983	ENST00000491714.1	OPHN1	-26912
61	chrX	70476569	70482539	5971	Promoter (<=1kb)	70479118	70499903	20786	1741	ENST00000466140.5	DLG3	0
62	chr9	26974845	26977934	3090	Promoter (<=1kb)	26976567	26990164	13598	80173	ENST00000517866.1	IFT74	0
63	chr12	56243834	56244048	215	Promoter (<=1kb)	56237807	56244727	6921	283373	ENST00000548241.1	ANKRD52	679
64	chrX	143501056	143501727	672	Intron (ENST00000431432.1/ENST00000431432.1, intron 3 of 5)	143508735	143517475	8741	139067	ENST00000370503.2	SPANXN3	15748
65	chr15	78559010	78562405	3396	Distal Intergenic	78565520	78595269	29750	1138	ENST00000299565.9	CHRNA5	-3115
66	chr15	55694361	55695461	1101	Intron (ENST00000389286.8/283659, intron 2 of 19)	55678013	55679830	1818	283659	ENST00000559842.1	PRTG	-14531
67	chr1	216729842	216730056	215	Intron (ENST00000361525.7/2104, intron 3 of 8)	216503246	216723472	220227	2104	ENST00000391890.7	ESRRG	-6370
68	chr2	168496385	168497534	1150	Intron (ENST00000305747.10/253782, intron 1 of 9)	168456249	168775134	318886	253782	ENST00000392687.4	CERS6	40136
69	chr8	42100615	42100904	290	Distal Intergenic	41929479	42052026	122548	7994	ENST00000265713.7	KAT6A	-48589
70	chr4	90061419	90062483	1065	Distal Intergenic	90127535	90923530	795996	401145	ENST00000505073.5	CCSER1	-65052
71	chr12	108627597	108631239	3643	Promoter (<=1kb)	108622829	108632078	9250	6404	ENST00000228463.6	SELPLG	839
72	chr1	85220692	85221128	437	Distal Intergenic	85156873	85201046	44174	84144	ENST00000341460.5	SYDE2	-19646
73	chr5	17244355	17244569	215	Intron (ENST00000606445.1/10409, intron 3 of 3)	17217560	17276834	59275	10409	ENST00000322611.3	BASP1	26795
74	chr13	28582691	28583329	639	Distal Intergenic	28659104	28678925	19822	51371	ENST00000380842.4	POMP	-75775
75	chrX	119898785	119899439	655	Promoter (2-3kb)	119896193	119920716	24524	158798	ENST00000334356.2	AKAP14	2592
76	chr1	84173929	84174953	1025	Intron (ENST00000370689.6/5567, intron 1 of 9)	84178835	84184046	5212	5567	ENST00000467507.1	PRKACB	-3882
77	chr10	53023082	53023795	714	Distal Intergenic	52765380	52771700	6321	4153	ENST00000373968.3	MBL2	-251382
78	chr6	6841761	6845130	3370	Distal Intergenic	6620847	6622771	1925	285780	ENST00000607278.1	LY86-AS1	-218990
79	chr9	6229161	6231024	1864	Intron (ENST00000417746.6/90865, intron 1 of 4)	6241680	6256223	14544	90865	ENST00000611532.4	IL33	-10656
80	chrX	68475912	68476695	784	Exon (ENST00000450604.1/ENST00000450604.1, exon 2 of 3)	68498323	68537285	38963	286451	ENST00000462683.5	YIPF6	-21628
81	chr17	64664052	64665335	1284	Promoter (1-2kb)	64545365	64662068	116704	64750	ENST00000262435.13	SMURF2	-1984
82	chr5	54421860	54422623	764	Distal Intergenic	54395351	54415099	19749	104355136	ENST00000504609.3	LINC01033	26509
83	chr5	79784579	79785586	1008	Intron (ENST00000446378.2/202333, intron 9 of 12)	79758753	79763419	4667	202333	ENST00000505466.1	CMYA5	25826
84	chr4	105915526	105916255	730	Intron (ENST00000504304.5/255743, intron 2 of 4)	105912176	105940138	27963	255743	ENST00000505821.1	NPNT	3350
85	chr10	47412528	47413945	1418	Distal Intergenic	47365496	47384273	18778	118738	ENST00000585316.2	ZNF488	-28255
86	chr13	31093260	31093474	215	Intron (ENST00000425638.2/ENST00000425638.2, intron 7 of 15)	31136625	31138568	1944	10808	ENST00000435381.5	HSPH1	45094
87	chr14	55376892	55377106	215	Intron (ENST00000558189.1/22863, intron 6 of 6)	55366392	55391302	24911	22863	ENST00000558189.1	ATG14	14196
88	chr18	59898485	59903410	4926	Promoter (<=1kb)	59899948	59904306	4359	5366	ENST00000316660.6	PMAIP1	0
89	chr15	98682463	98684970	2508	Intron (ENST00000649865.1/3480, intron 1 of 20)	98707831	98891619	183789	3480	ENST00000558355.1	IGF1R	-22861
90	chr7	131556206	131558524	2319	Promoter (<=1kb)	131500262	131556563	56302	5420	ENST00000446198.5	PODXL	0
91	chr6	22319919	22321692	1774	Intron (ENST00000561912.2/ENST00000561912.2, intron 6 of 10)	22287251	22297501	10251	5617	ENST00000306482.1	PRL	-22418
92	chr15	98744454	98747317	2864	Intron (ENST00000649865.1/3480, intron 2 of 20)	98734712	98899546	164835	3480	ENST00000557938.5	IGF1R	9742
93	chr16	75733083	75734563	1481	Intron (ENST00000564671.2/ENST00000564671.2, intron 1 of 2)	75714224	75726442	12219	105371346	ENST00000640559.1	CPHXL	-6641
94	chr4	84589474	84599480	10007	Intron (ENST00000295887.5/1040, intron 1 of 12)	84583269	84619511	36243	1040	ENST00000511298.1	CDS1	6205
95	chr11	1060135	1062082	1948	Distal Intergenic	1049880	1055749	5870	101927503	ENST00000534584.2	LINC02688	10255
96	chr18	53946726	53948028	1303	Distal Intergenic	54155254	54160113	4860	8932	ENST00000579025.1	MBD2	212085
97	chr14	47794624	47795087	464	Promoter (<=1kb)	47764954	47795014	30061	100506433	ENST00000555985.5	LINC00648	0
98	chr17	47555621	47556299	679	Intron (ENST00000525007.5/9520, intron 3 of 5)	47548190	47592673	44484	9520	ENST00000602788.5	NPEPPS	7431
99	chr13	29862033	29862795	763	Distal Intergenic	29764371	29850684	86314	5412	ENST00000380680.4	UBL3	-11349
100	chrX	132836682	132838195	1514	Intron (ENST00000370836.6/90161, intron 3 of 3)	132628852	132957277	328426	90161	ENST00000640529.1	HS6ST2	119082
101	chr3	86037678	86038486	809	Intron (ENST00000383699.7/253559, intron 8 of 9)	85799987	85828050	28064	100874037	ENST00000467225.1	CADM2-AS2	-209628
102	chr7	84090781	84092882	2102	Intron (ENST00000265362.8/10371, intron 4 of 16)	83955777	84194901	239125	10371	ENST00000265362.8	SEMA3A	102019
103	chr1	58625953	58626167	215	Distal Intergenic	58654751	58668483	13733	114803	ENST00000622766.1	MYSM1	42316
104	chr2	109067393	109067607	215	Distal Intergenic	109127327	109128930	1604	100287216	ENST00000567491.1	SH3RF3-AS1	61323
105	chr11	102165739	102166030	292	Intron (ENST00000526343.5/10413, intron 3 of 6)	102162456	102186686	24231	10413	ENST00000526594.1	YAP1	3283
106	chr6	158773167	158773790	624	Intron (ENST00000337147.11/7430, intron 7 of 12)	158764661	158764753	93	100500851	ENST00000581555.1	MIR3918	-8414
107	chr7	108080301	108081862	1562	Intron (ENST00000205386.8/22798, intron 14 of 33)	108062397	108065858	3462	22798	ENST00000471677.5	LAMB4	-14443
108	chr11	72173980	72175830	1851	Intron (ENST00000538934.1/ENST00000538934.1, intron 1 of 3)	72189558	72196323	6766	2348	ENST00000312293.9	FOLR1	-13728
109	chr14	67563991	67571224	7234	Promoter (<=1kb)	67569033	67587681	18649	57475	ENST00000558386.5	PLEKHH1	0
110	chr4	46773064	46774711	1648	Intron (ENST00000396533.5/170712, intron 3 of 3)	46734832	46876760	141929	170712	ENST00000543208.5	COX7B2	102049
111	chr17	72646188	72646532	345	3' UTR	72598041	72640472	42432	400619	ENST00000581549.1	LINC00511	-5716
112	chr8	41361173	41361387	215	Distal Intergenic	41261958	41309497	47540	6422	ENST00000220772.7	SFRP1	-51676
113	chr1	98180225	98182525	2301	Distal Intergenic	98210747	98272658	61912	729987	ENST00000418344.1	LINC01776	-28222
114	chr9	39853946	39854218	273	Intron (ENST00000640245.1/654466, intron 2 of 3)	39816600	39874206	57607	654466	ENST00000640486.1	FGF7P3	19988
115	chr8	8988853	9000017	11165	Promoter (2-3kb)	9002147	9033341	31195	90459	ENST00000523898.5	ERI1	-2130
116	chr3	188551973	188553392	1420	Intron (ENST00000448637.5/4026, intron 5 of 6)	188568150	188609551	41402	4026	ENST00000462758.1	LPP	-14758
117	chr17	60198915	60199129	215	Intron (ENST00000300896.8/84669, intron 26 of 33)	60207729	60208813	1085	84669	ENST00000585720.1	USP32	9684
118	chr12	59937571	59939258	1688	Distal Intergenic	59769059	59775035	5977	9194	ENST00000548444.1	SLC16A7	168512
119	chr13	93727000	93731925	4926	Intron (ENST00000377047.8/10082, intron 2 of 8)	93818424	93836144	17721	100873973	ENST00000445540.1	GPC6-AS2	104219
120	chr15	22744621	22745241	621	Exon (ENST00000622242.4/ENST00000622242.4, exon 7 of 7)	22757857	22778741	20885	283683	ENST00000619611.4	LOC283683	-12616
121	chr12	41510223	41511138	916	Promoter (<=1kb)	41509551	41574590	65040	29951	ENST00000548316.1	PDZRN4	672
122	chr9	91947979	91951151	3173	Promoter (<=1kb)	91563091	91948880	385790	4920	ENST00000375715.5	ROR2	0
123	chr1	151501345	151504840	3496	Distal Intergenic	151510510	151519029	8520	57530	ENST00000505188.5	CGN	-5670
124	chr22	49487067	49488880	1814	Intron (ENST00000414287.5/348645, intron 1 of 4)	49543393	49543466	74	100500882	ENST00000581025.1	MIR3667	54586
125	chr11	10095309	10096142	834	Intron (ENST00000256190.12/81846, intron 2 of 39)	9993012	10044606	51595	81846	ENST00000527019.5	SBF2	-50703
126	chr20	47438100	47439878	1779	Distal Intergenic	47391929	47412327	20399	102723442	ENST00000437920.1	LINC01754	-25773
127	chr5	10895638	10895852	215	Distal Intergenic	10973587	11018060	44474	1501	ENST00000506324.1	CTNND2	122208
128	chr9	69762376	69764714	2339	Promoter (2-3kb)	69757123	69759959	2837	375743	ENST00000472967.2	PTAR1	-2417
129	chr11	80621413	80623848	2436	Distal Intergenic	80751200	80762826	11627	101928944	ENST00000526840.1	LOC101928944	138978
130	chr2	176813906	176814804	899	Intron (ENST00000428283.5/ENST00000428283.5, intron 1 of 5)	176629589	176637931	8343	375295	ENST00000295549.8	LINC01116	-175975
131	chr2	207329629	207339707	10079	Exon (ENST00000412387.5/101927865, exon 4 of 5)	207269275	207269424	150	100302130	ENST00000408701.1	MIR1302-4	-60205
132	chr2	230669120	230669334	215	Distal Intergenic	230690921	230700529	9609	151475	ENST00000415174.1	LINC01907	31195
133	chr15	59620428	59620831	404	Promoter (2-3kb)	59617939	59618697	759	9245	ENST00000559200.1	GCNT3	2489
134	chr2	152846886	152847100	215	Distal Intergenic	152720167	152760595	40429	151188	ENST00000463690.1	ARL6IP6	126719
135	chr8	141308616	141309047	432	Promoter (<=1kb)	141218774	141308305	89532	57210	ENST00000520137.1	SLC45A4	-311
136	chr1	224353559	224355513	1955	Promoter (1-2kb)	224356850	224379452	22603	29097	ENST00000465271.5	CNIH4	-1337
137	chr8	89609530	89616621	7092	Exon (ENST00000519655.6/101929709, exon 4 of 7)	89720944	89722350	1407	101929709	ENST00000523995.1	LOC101929709	105729
138	chr1	248933879	248934443	565	Distal Intergenic	248906372	248917401	11030	267002	ENST00000462488.1	PGBD2	27507
139	chr2	229405675	229411931	6257	Exon (ENST00000341772.4/92737, exon 10 of 13)	229023995	229271285	247291	55022	ENST00000392055.7	PID1	-134390
140	chr5	124080061	124080333	273	Intron (ENST00000628324.2/103724389, intron 2 of 3)	124059794	124395039	335246	103724389	ENST00000628324.2	LINC01170	314706
141	chr5	72068209	72068548	340	Distal Intergenic	72107234	72183823	76590	4131	ENST00000512974.5	MAP1B	-38686
142	chr14	71187003	71189385	2383	Distal Intergenic	71109020	71110161	1142	22990	ENST00000555780.1	PCNX1	77983
143	chr6	54892304	54893570	1267	Intron (ENST00000306858.7/222584, intron 2 of 4)	54846771	54942022	95252	222584	ENST00000306858.7	FAM83B	45533
144	chr17	49968532	49969045	514	Promoter (<=1kb)	49968970	49973191	4222	1748	ENST00000503410.1	DLX4	0
145	chr11	37499074	37507288	8215	Distal Intergenic	37938601	37954663	16063	105376633	ENST00000532562.1	LOC105376633	-431313
146	chr8	8440541	8442927	2387	Distal Intergenic	8317737	8386498	68762	157285	ENST00000615670.4	PRAG1	-54043
147	chr17	72617417	72620565	3149	Promoter (<=1kb)	72598041	72618401	20361	400619	ENST00000649074.1	LINC00511	0
148	chr7	111901631	111907214	5584	Exon (ENST00000428084.5/9732, exon 14 of 53)	111726110	111877128	151019	9732	ENST00000423057.6	DOCK4	-24503
149	chr9	37062171	37062385	215	Distal Intergenic	37079857	37090507	10651	100506710	ENST00000625445.1	EBLN3P	-17472
150	chr7	118056924	118057981	1058	Distal Intergenic	118184032	118192824	8793	51691	ENST00000249299.6	LSM8	-126051
151	chr10	125056915	125058142	1228	Intron (ENST00000337195.9/1488, intron 2 of 10)	125032783	125032870	88	100423041	ENST00000581038.1	MIR4296	-24045
152	chr1	94595284	94595959	676	Distal Intergenic	94529225	94541800	12576	2152	ENST00000334047.11	F3	-53484
153	chr2	219500530	219502027	1498	Promoter (<=1kb)	219499955	219506988	7034	29926	ENST00000622191.1	GMPPA	575
154	chr2	158232800	158233069	270	Intron (ENST00000412781.2/554201, intron 4 of 4)	158166650	158236169	69520	554201	ENST00000412781.2	CCDC148-AS1	66150
155	chr22	18929362	18929685	324	Promoter (1-2kb)	18924725	18931110	6386	5625	ENST00000496625.1	PRODH	1425
156	chr12	72655854	72656685	832	Intron (ENST00000261180.8/29953, intron 17 of 18)	72568630	72621331	52702	29953	ENST00000549922.1	TRHDE	87224
157	chr6	21806743	21812473	5731	Intron (ENST00000606336.5/401237, intron 6 of 6)	21898720	22214505	315786	401237	ENST00000444265.6	CASC15	-86247
158	chr19	20181861	20184038	2178	Intron (ENST00000597083.5/90649, intron 1 of 3)	20167274	20200490	33217	90649	ENST00000335117.8	ZNF486	14587
159	chr5	59264046	59267243	3198	Intron (ENST00000340635.10/5144, intron 1 of 14)	58974561	59276119	301559	5144	ENST00000503258.5	PDE4D	8876
160	chr8	47543936	47544590	655	Intron (ENST00000297423.8/23514, intron 8 of 19)	47440401	47735916	295516	23514	ENST00000519401.5	SPIDR	103535
161	chr3	112670070	112674460	4391	Distal Intergenic	112640721	112649447	8727	151887	ENST00000473959.5	CCDC80	-20623
162	chr6	163965610	163966767	1158	Distal Intergenic	163566458	163571452	4995	9444	ENST00000541696.1	QKI	399152
163	chr19	20279311	20279525	215	Intron (ENST00000593655.5/ENST00000593655.5, intron 2 of 4)	20167274	20200490	33217	90649	ENST00000335117.8	ZNF486	112037
164	chr11	45484390	45484604	215	Intron (ENST00000528445.1/ENST00000528445.1, intron 2 of 2)	45371397	45388508	17112	399886	ENST00000528390.1	LINC02687	112993
165	chr12	88853271	88856704	3434	Distal Intergenic	89010681	89019679	8999	728084	ENST00000500381.2	LINC02458	162975
166	chr1	58569882	58570211	330	Distal Intergenic	58575423	58577773	2351	4070	ENST00000371225.3	TACSTD2	7562
167	chrX	38017552	38019959	2408	Intron (ENST00000465127.1/7102, intron 3 of 8)	38023895	38023986	92	100616252	ENST00000408539.2	MIR548AJ2	4027
168	chr5	105872081	105873376	1296	Distal Intergenic	105099473	105100098	626	9366	ENST00000519581.1	RAB9BP1	772608
169	chr9	11933366	11934795	1430	Intron (ENST00000649122.1/ENST00000649122.1, intron 4 of 5)	12685439	12694303	8865	7306	ENST00000473763.1	TYRP1	-750644
170	chr18	5601034	5601303	270	Intron (ENST00000637651.1/23136, intron 1 of 21)	5478399	5577648	99250	23136	ENST00000582592.1	EPB41L3	-23386
171	chr8	19225026	19225524	499	Intron (ENST00000520920.5/100128993, intron 4 of 4)	19183674	19235677	52004	100128993	ENST00000518417.1	LOC100128993	10153
172	chr12	120797214	120797492	279	Intron (ENST00000353487.6/121665, intron 2 of 10)	120784203	120791945	7743	121665	ENST00000534966.1	SPPL3	-5269
173	chr1	118292175	118292389	215	Distal Intergenic	118150397	118185223	34827	200162	ENST00000465053.1	SPAG17	-106952
174	chr12	6092655	6094479	1825	Intron (ENST00000261405.9/7450, intron 6 of 51)	6122724	6124665	1942	7450	ENST00000540192.1	VWF	30186
175	chr1	15166069	15166456	388	Intron (ENST00000428417.5/55092, intron 1 of 2)	15164344	15171317	6974	727684	ENST00000424792.5	C1orf195	4861
176	chr2	196608189	196608563	375	Distal Intergenic	196199351	196593692	394342	57520	ENST00000644978.1	HECW2	-14497
177	chr14	97801353	97801567	215	Distal Intergenic	97751564	97763989	12426	100132612	ENST00000557296.1	LINC02312	-37364
178	chrX	133668015	133668764	750	Intron (ENST00000370818.7/2719, intron 5 of 7)	133596366	133753702	157337	2719	ENST00000406757.2	GPC3	84938
179	chr8	19110711	19110978	268	Intron (ENST00000518324.1/ENST00000518324.1, intron 2 of 2)	18936041	19084730	148690	23362	ENST00000521475.1	PSD3	-25981
180	chr6	27774144	27774411	268	Distal Intergenic	27807444	27807931	488	8340	ENST00000377401.3	HIST1H2BL	33520
181	chr12	126905616	126905886	271	Distal Intergenic	126869490	126874690	5201	440117	ENST00000507482.6	LINC02372	-30926
182	chr16	15983790	15984121	332	Intron (ENST00000399410.7/4363, intron 1 of 30)	16009856	16141525	131670	4363	ENST00000572882.2	ABCC1	-25735
183	chr3	26314986	26315200	215	Distal Intergenic	26622806	26710776	87971	116135	ENST00000396641.6	LRRC3B	-307606
184	chr5	120448876	120451139	2264	Distal Intergenic	120464278	120687332	223055	51334	ENST00000407149.6	PRR16	-13139
185	chr3	175386029	175386804	776	Intron (ENST00000454872.5/254827, intron 5 of 13)	175369540	175369621	82	100616395	ENST00000577469.1	MIR4789	16489
186	chr8	6338494	6338935	442	Distal Intergenic	6403551	6406548	2998	100287015	ENST00000500118.2	LOC100287015	67613
187	chr3	180250491	180250813	323	Distal Intergenic	180414174	180422506	8333	100505609	ENST00000488262.1	LINC02053	-163361
188	chr11	105466251	105466629	379	Intron (ENST00000649856.1/59082, intron 1 of 7)	105137721	105516002	378282	59082	ENST00000649856.1	CARD18	49373
189	chr6	47294433	47296151	1719	Intron (ENST00000296861.2/27242, intron 1 of 5)	47231532	47309905	78374	27242	ENST00000296861.2	TNFRSF21	13754
190	chr5	181161223	181162231	1009	Distal Intergenic	181154943	181155890	948	285659	ENST00000328275.1	OR2V2	6280
191	chr1	238657881	238659273	1393	Distal Intergenic	238480398	238486054	5657	339535	ENST00000648188.1	LINC01139	-171827
192	chr1	81435949	81437322	1374	Intron (ENST00000473719.5/23266, intron 1 of 4)	81513880	81557702	43823	101927434	ENST00000443939.1	LOC101927434	120380
193	chr3	132268064	132268333	270	Intron (ENST00000512055.5/131034, intron 2 of 19)	131533565	132285410	751846	131034	ENST00000512055.5	CPNE4	17077
194	chr3	50034711	50034925	215	Intron (ENST00000442092.5/10180, intron 2 of 16)	50047109	50058466	11358	10180	ENST00000446471.1	RBM6	-12184
195	chr5	30849088	30851072	1985	Distal Intergenic	31193750	31318346	124597	1004	ENST00000514738.5	CDH6	-342678
196	chr4	79678608	79679953	1346	Intron (ENST00000506460.1/ENST00000506460.1, intron 2 of 3)	79827471	79863247	35777	118425	ENST00000504263.1	PCAT4	-147518
197	chr19	6403284	6403498	215	Intron (ENST00000637688.2/390877, intron 3 of 4)	6396345	6412404	16060	390877	ENST00000596254.1	LOC390877	6939
198	chr22	27663013	27664275	1263	Distal Intergenic	27750678	27791883	41206	4330	ENST00000497225.1	MN1	127608
199	chr8	54043930	54045714	1785	Exon (ENST00000565668.2/ENST00000565668.2, exon 1 of 3)	54047963	54052898	4936	10434	ENST00000520718.1	LYPLA1	7184
200	chr1	180923385	180923660	276	Intron (ENST00000367588.8/57710, intron 3 of 8)	180928147	180946102	17956	57710	ENST00000367587.1	KIAA1614	-4487
201	chrX	4570535	4570867	333	Distal Intergenic	4627200	4633572	6373	101928201	ENST00000420725.1	LOC101928201	62705
202	chr7	12280881	12281518	638	Distal Intergenic	12230358	12232400	2043	54664	ENST00000462754.1	TMEM106B	50523
203	chr3	156317564	156318248	685	Intron (ENST00000478609.5/7881, intron 2 of 3)	156291920	156514391	222472	7881	ENST00000489036.5	KCNAB1	25644
204	chr11	98734212	98734974	763	Distal Intergenic	99020953	99049844	28892	53942	ENST00000525047.1	CNTN5	-285979
205	chr17	41065260	41065580	321	Promoter (<=1kb)	41065116	41065879	764	85294	ENST00000394015.3	KRTAP2-4	299
206	chr17	2319810	2320137	328	Intron (ENST00000344595.9/63826, intron 4 of 7)	2315378	2317900	2523	63826	ENST00000574229.1	SRR	4432
207	chr2	223056955	223057428	474	Intron (ENST00000488477.2/23704, intron 1 of 3)	223052200	223198399	146200	23704	ENST00000488477.2	KCNE4	4755
208	chrX	133554794	133555008	215	Intron (ENST00000370818.7/2719, intron 7 of 7)	133300103	133415490	115388	2239	ENST00000370828.3	GPC4	-139304
209	chrX	22299923	22301194	1272	Intron (ENST00000608254.1/100873065, intron 5 of 5)	22272943	22274461	1519	158506	ENST00000323684.3	CBLL2	26980
210	chr5	147414991	147419107	4117	Exon (ENST00000398514.7/1809, exon 3 of 14)	147401540	147406198	4659	1809	ENST00000508042.1	DPYSL3	-8793
211	chr17	81563907	81564121	215	Promoter (2-3kb)	81558789	81566602	7814	55666	ENST00000572760.5	NPLOC4	2481
212	chr9	134455748	134456394	647	Distal Intergenic	134386122	134401882	15761	6256	ENST00000649020.1	RXRA	69626
213	chr1	201459779	201463431	3653	Downstream (<1kb)	201465944	201466657	714	23612	ENST00000497057.1	PHLDA3	3226
214	chr12	56009139	56011293	2155	Promoter (<=1kb)	56011136	56026804	15669	64375	ENST00000550860.5	IKZF4	0
215	chr4	5724093	5724417	325	Intron (ENST00000264956.10/2121, intron 2 of 20)	5711215	5758311	47097	2121	ENST00000509451.1	EVC	12878
216	chr2	55656138	55656406	269	3' UTR	55636370	55647382	11013	87178	ENST00000481066.1	PNPT1	-8756
217	chr4	179292128	179293158	1031	Distal Intergenic	177903384	177907936	4553	101928656	ENST00000514736.1	LINC01099	-1384192
218	chrX	9842216	9848854	6639	Intron (ENST00000380913.7/357, intron 1 of 9)	9898145	9937146	39002	357	ENST00000493668.1	SHROOM2	-49291
219	chr9	127572905	127577375	4471	Promoter (1-2kb)	127505339	127578989	73651	64855	ENST00000373314.7	NIBAN2	1614
220	chr2	106160771	106165463	4693	Promoter (<=1kb)	106104794	106160625	55832	80146	ENST00000416298.5	UXS1	-146
221	chr9	73869650	73869918	269	Distal Intergenic	74371531	74383530	12000	101927358	ENST00000423681.1	LOC101927358	-501613
222	chr2	30628528	30631599	3072	Intron (ENST00000379509.7/253558, intron 5 of 5)	30729541	30732484	2944	92291	ENST00000490786.1	CAPN13	100885
223	chr6	147153540	147155336	1797	Intron (ENST00000427394.5/729178, intron 3 of 10)	147158925	147180992	22068	106182249	ENST00000359838.3	LUADT1	-3589
224	chr4	24794151	24794436	286	Promoter (1-2kb)	24795463	24800842	5380	6649	ENST00000382120.3	SOD3	-1027
225	chr11	33167802	33170544	2743	Intron (ENST00000531870.5/338739, intron 1 of 2)	33141708	33162371	20664	1479	ENST00000524775.1	CSTF3	-5431
226	chr7	80897539	80897806	268	Intron (ENST00000265361.7/10512, intron 2 of 17)	80827430	80918429	91000	10512	ENST00000411788.5	SEMA3C	20623
227	chr15	98686804	98687076	273	Intron (ENST00000649865.1/3480, intron 1 of 20)	98707831	98891619	183789	3480	ENST00000558355.1	IGF1R	-20755
228	chr9	94139694	94140096	403	Distal Intergenic	94175957	94176036	80	406881	ENST00000362295.3	MIRLET7A1	-35861
229	chr15	74395423	74398857	3435	Distal Intergenic	74411357	74411432	76	102465530	ENST00000616450.1	MIR6881	12575
230	chr4	135116798	135117246	449	Intron (ENST00000511899.1/105377439, intron 1 of 2)	135112905	135123737	10833	105377439	ENST00000511899.1	LINC02485	6491
231	chr3	3707385	3709651	2267	Intron (ENST00000470751.5/100130207, intron 5 of 5)	3799437	3847703	48267	57633	ENST00000319331.3	LRRN1	-89786
232	chr3	50674520	50675663	1144	Promoter (<=1kb)	50675080	50675163	84	100616138	ENST00000607364.1	MIR4787	0
233	chr21	31871871	31874914	3044	Promoter (<=1kb)	31873315	32004064	130750	30811	ENST00000270112.6	HUNK	0
234	chr4	89504980	89508036	3057	Distal Intergenic	89236386	89308010	71625	285513	ENST00000609438.1	GPRIN3	-196970
235	chr9	74942471	74942685	215	Distal Intergenic	74946581	74952886	6306	55071	ENST00000376854.5	C9orf40	10201
236	chr12	66000044	66000319	276	Distal Intergenic	66023620	66023726	107	102464827	ENST00000612054.1	MIR6074	23407
237	chr17	6597640	6600501	2862	Promoter (2-3kb)	6578148	6594999	16852	9851	ENST00000576281.5	KIAA0753	-2641
238	chr8	49797445	49797659	215	Distal Intergenic	49909789	50792829	883041	54212	ENST00000518864.5	SNTG1	-112130
239	chr13	59744621	59746634	2014	Intron (ENST00000400324.8/81624, intron 27 of 27)	59665692	59751021	85330	81624	ENST00000649952.1	DIAPH3	4387
240	chr6	21450452	21453280	2829	Distal Intergenic	21486061	21511895	25835	100874531	ENST00000630914.1	LINC00581	58615
241	chr2	98739018	98739350	333	Distal Intergenic	98619106	98731126	112021	11320	ENST00000393487.5	MGAT4A	-7892
242	chr12	59058616	59060784	2169	Intron (ENST00000547590.1/ENST00000547590.1, intron 3 of 3)	58872149	58920522	48374	121227	ENST00000320743.7	LRIG3	-138094
243	chr18	11828864	11829078	215	Intron (ENST00000334049.10/2774, intron 5 of 11)	11851396	11854449	3054	57132	ENST00000526991.2	CHMP1B	-22318
244	chr2	18308882	18312131	3250	Intron (ENST00000465292.5/3790, intron 3 of 4)	18555122	18560679	5558	57665	ENST00000468071.1	RDH14	248548
245	chrX	134906958	134907636	679	Intron (ENST00000370783.7/56180, intron 1 of 5)	134889123	134899534	10412	56180	ENST00000370777.1	MOSPD1	-7424
246	chr12	76708871	76709446	576	Distal Intergenic	76763588	76853696	90109	23390	ENST00000426126.6	ZDHHC17	-54142
247	chr19	52492713	52494000	1288	Promoter (<=1kb)	52492830	52511142	18313	147660	ENST00000601120.1	ZNF578	0
248	chr1	177350960	177351705	746	Promoter (<=1kb)	177351586	177366272	14687	102724661	ENST00000451341.1	LINC01645	0
249	chr14	51026575	51030015	3441	Intron (ENST00000298355.7/114088, intron 1 of 9)	50979508	50982311	2804	114088	ENST00000555170.1	TRIM9	-44264
250	chr7	151023876	151025298	1423	Promoter (<=1kb)	151012214	151024499	12286	285973	ENST00000605952.5	ATG9B	0
251	chr14	37081511	37081912	402	Intron (ENST00000555449.5/89874, intron 1 of 10)	37171888	37173811	1924	100129794	ENST00000556667.1	SLC25A21-AS1	-89976
252	chr18	11751611	11753356	1746	Promoter (<=1kb)	11752113	11881923	129811	2774	ENST00000423027.7	GNAL	0
253	chr12	86666572	86666786	215	Intron (ENST00000621808.4/25834, intron 2 of 8)	86002352	86601304	598953	25834	ENST00000602941.6	MGAT4C	-65268
254	chr19	43700830	43704809	3980	Distal Intergenic	43716010	43720021	4012	56269	ENST00000244314.5	IRGC	-11201
255	chr3	33315128	33316195	1068	Intron (ENST00000498807.5/25827, intron 3 of 7)	33289669	33373303	83635	25827	ENST00000464164.5	FBXL2	25459
256	chr14	61355094	61355308	215	Intron (ENST00000555185.5/5583, intron 1 of 3)	61361074	61449247	88174	5583	ENST00000556164.5	PRKCH	-5766
257	chr1	30748675	30749006	332	Promoter (2-3kb)	30733889	30746229	12341	7805	ENST00000464569.1	LAPTM5	-2446
258	chr17	59061926	59063299	1374	3' UTR	59064152	59079807	15656	4591	ENST00000582852.1	TRIM37	16508
259	chr3	120135334	120136374	1041	Exon (ENST00000484076.1/ENST00000484076.1, exon 6 of 6)	119821323	120094417	273095	2932	ENST00000264235.12	GSK3B	-40917
260	chr2	185275557	185276175	619	Distal Intergenic	184866365	184939489	73125	91752	ENST00000613975.1	ZNF804A	409192
261	chr4	2976451	2978457	2007	Intron (ENST00000398051.8/2868, intron 1 of 13)	2963821	3040747	76927	2868	ENST00000504933.1	GRK4	12630
262	chr2	185969837	185970902	1066	Distal Intergenic	186033495	186081345	47851	101927217	ENST00000427108.5	LINC01473	110443
263	chr9	16013022	16013236	215	Intron (ENST00000486641.2/203238, intron 3 of 9)	15887795	15920334	32540	203238	ENST00000472806.1	CCDC171	125227
264	chr19	41436248	41437259	1012	Promoter (<=1kb)	41431749	41436439	4691	55101	ENST00000594660.5	DMAC2	0
265	chr5	157020707	157023721	3015	Distal Intergenic	157029740	157049149	19410	26762	ENST00000517644.1	HAVCR1	25428
266	chr12	92471643	92473086	1444	Intron (ENST00000508671.1/100507616, intron 1 of 1)	92466451	92492091	25641	100507616	ENST00000504409.3	LINC02397	5192
267	chr2	36457818	36463759	5942	Intron (ENST00000280527.6/51232, intron 4 of 16)	36479543	36499412	19870	51232	ENST00000481321.1	CRIM1	-15784
268	chr1	201754230	201754444	215	Intron (ENST00000367302.5/89796, intron 5 of 29)	201739868	201826969	87102	89796	ENST00000367295.5	NAV1	14362
269	chr15	41549513	41551085	1573	Distal Intergenic	41536163	41544269	8107	26015	ENST00000566863.1	RPAP1	-5244
270	chr3	29682337	29688346	6010	Intron (ENST00000635992.1/152098, intron 11 of 13)	29698193	29739849	41657	27303	ENST00000478716.1	RBMS3	-9847
271	chr11	74134435	74141759	7325	Promoter (<=1kb)	74129174	74133630	4457	26005	ENST00000436679.2	C2CD3	-805
272	chr19	38319189	38320637	1449	Promoter (<=1kb)	38319844	38332076	12233	9424	ENST00000263372.4	KCNK6	0
273	chr3	98985656	98986109	454	Intron (ENST00000474798.1/ENST00000474798.1, intron 2 of 3)	98795941	98901689	105749	131566	ENST00000326840.10	DCBLD2	-83967
274	chr8	127617736	127619968	2233	Distal Intergenic	127686343	127733967	47625	100270680	ENST00000502463.7	CASC11	113999
275	chr7	120732964	120733886	923	Exon (ENST00000331113.8/3751, exon 2 of 6)	120740844	120747738	6895	3751	ENST00000425288.1	KCND2	-6958
276	chr14	96861901	96862509	609	Promoter (2-3kb)	96858909	96881391	22483	7443	ENST00000555067.1	VRK1	2992
277	chr10	90132	90524	393	Distal Intergenic	46892	74163	27272	347688	ENST00000564130.2	TUBB8	-15969
278	chr1	153585873	153589255	3383	Exon (ENST00000647794.1/ENST00000647794.1, exon 2 of 2)	153561340	153567890	6551	6273	ENST00000368710.5	S100A2	-17983
279	chr10	102308875	102314312	5438	Intron (ENST00000369983.3/8729, intron 3 of 39)	102359099	102361187	2089	8729	ENST00000476019.1	GBF1	-44787
280	chr11	103394568	103397265	2698	Intron (ENST00000375735.6/79659, intron 83 of 88)	103358243	103479345	121103	79659	ENST00000533197.1	DYNC2H1	36325
281	chr4	168421346	168422417	1072	Promoter (<=1kb)	168415785	168422588	6804	91351	ENST00000504793.1	DDX60L	171
282	chr1	206336995	206337209	215	Intron (ENST00000419187.6/23380, intron 1 of 6)	206312148	206392904	80757	23380	ENST00000604133.1	SRGAP2	24847
283	chrX	44382639	44384292	1654	Distal Intergenic	44148665	44343672	195008	80258	ENST00000420999.1	EFHC2	-38967
284	chr21	37770280	37770494	215	Intron (ENST00000609713.1/3763, intron 2 of 3)	37607376	37916446	309071	3763	ENST00000609713.1	KCNJ6	145952
285	chr15	44682069	44684632	2564	Intron (ENST00000558573.1/197135, intron 1 of 1)	44665735	44676888	11154	197135	ENST00000560780.1	PATL2	-5181
286	chr1	32464435	32464770	336	Promoter (<=1kb)	32465057	32600792	135736	653121	ENST00000480336.1	ZBTB8A	-287
287	chr4	177788474	177790026	1553	Intron (ENST00000507870.1/285501, intron 2 of 5)	177728757	177990750	261994	285501	ENST00000507870.1	LINC01098	59717
288	chr1	42222020	42223230	1211	Intron (ENST00000372572.5/22887, intron 7 of 14)	42194997	42206011	11015	22887	ENST00000422278.1	FOXJ3	-16009
289	chr11	122720839	122721131	293	Intron (ENST00000284273.5/84959, intron 1 of 13)	122709262	122779595	70334	84959	ENST00000526386.5	UBASH3B	11577
290	chr12	120925973	120926527	555	Distal Intergenic	120762510	120904371	141862	121665	ENST00000353487.6	SPPL3	-21602
291	chr2	86866331	86866545	215	Intron (ENST00000616781.4/100286979, intron 1 of 14)	86844632	86861924	17293	926	ENST00000431506.3	CD8B	-4407
292	chr13	48858640	48860789	2150	Distal Intergenic	48975912	49209779	233868	22862	ENST00000492622.6	FNDC3A	-115123
293	chrX	133725635	133727150	1516	Intron (ENST00000370818.7/2719, intron 3 of 7)	133596366	133753702	157337	2719	ENST00000406757.2	GPC3	26552
294	chr1	101526635	101526849	215	Distal Intergenic	101350049	101390303	40255	104355286	ENST00000444327.1	LINC01307	176586
295	chr3	173749719	173750823	1105	Intron (ENST00000457714.5/22871, intron 3 of 6)	173584920	174278982	694063	22871	ENST00000415045.1	NLGN1	164799
296	chr19	10789515	10790406	892	Intron (ENST00000585892.5/1785, intron 7 of 20)	10795716	10798562	2847	1785	ENST00000593220.1	DNM2	-5310
297	chr6	141421838	141422284	447	Distal Intergenic	142075608	142088799	13192	4829	ENST00000258042.1	NMBR	666515
298	chr11	93192543	93192823	281	Intron (ENST00000326402.8/120103, intron 1 of 10)	93148315	93197455	49141	120103	ENST00000529184.5	SLC36A4	4632
299	chr8	57288119	57289272	1154	Distal Intergenic	57279543	57284731	5189	26138	ENST00000521663.1	LINC00588	8576
300	chr6	24565874	24567198	1325	Exon (ENST00000616673.4/9856, exon 10 of 17)	24544104	24583227	39124	9856	ENST00000616673.4	KIAA0319	16029
301	chr13	92838565	92838835	271	Intron (ENST00000377067.8/2262, intron 7 of 7)	92701389	92721614	20226	100873969	ENST00000419288.1	GPC5-AS1	-116951
302	chr3	12758045	12760773	2729	Promoter (<=1kb)	12733525	12759539	26015	55287	ENST00000314124.11	TMEM40	0
303	chr11	36402625	36403899	1275	Promoter (1-2kb)	36401065	36462439	61375	79899	ENST00000527487.1	PRR5L	1560
304	chr11	8865889	8866103	215	Intron (ENST00000534127.5/6764, intron 2 of 22)	8730955	8870917	139963	6764	ENST00000527347.5	ST5	4814
305	chr10	32412077	32414324	2248	Distal Intergenic	32446140	32574560	128421	79741	ENST00000476558.7	CCDC7	-31816
306	chr13	20939128	20940922	1795	Exon (ENST00000424329.1/101930748, exon 5 of 6)	20938564	20949428	10865	101930748	ENST00000424329.1	LINC00367	8506
307	chr1	213656050	213658010	1961	Distal Intergenic	213832591	213841041	8451	100505832	ENST00000609394.5	PROX1-AS1	183031
308	chr3	149789853	149791234	1382	Promoter (<=1kb)	149778354	149790927	12574	389161	ENST00000474404.1	ANKUB1	0
309	chr10	83366783	83366997	215	Distal Intergenic	83672406	83675439	3034	105378397	ENST00000441776.1	LINC02650	308442
310	chr15	24074802	24075420	619	Distal Intergenic	24162755	24169857	7103	791115	ENST00000567854.1	PWRN2	94437
311	chr11	27199976	27207359	7384	Intron (ENST00000526061.5/103695435, intron 2 of 3)	27047186	27218735	171550	103695435	ENST00000526061.5	BBOX1-AS1	11376
312	chr18	31808500	31811776	3277	Distal Intergenic	31830921	31832595	1675	22878	ENST00000584604.1	TRAPPC8	20819
313	chr14	46733818	46735185	1368	Distal Intergenic	46651010	46651821	812	140801	ENST00000298283.4	RPL10L	-81997
314	chr11	36033814	36035986	2173	Intron (ENST00000524419.5/143458, intron 1 of 5)	36010098	36010204	107	100616311	ENST00000579824.1	MIR3973	23716
315	chr12	31645671	31645885	215	Promoter (1-2kb)	31647160	31668075	20916	254013	ENST00000412352.6	ETFBKMT	-1275
316	chr12	63915360	63921335	5976	Intron (ENST00000355086.7/57522, intron 1 of 21)	63982525	64143780	161256	57522	ENST00000543397.1	SRGAP1	-61190
317	chr8	59423310	59424153	844	Distal Intergenic	59119946	59121315	1370	100505501	ENST00000517898.1	LOC100505501	303364
318	chr9	28883058	28883379	322	Distal Intergenic	28888879	28888955	77	100126316	ENST00000401120.3	MIR873	5576
319	chr8	119647770	119653240	5471	Intron (ENST00000427067.6/5168, intron 1 of 25)	119557521	119638839	81319	5168	ENST00000075322.10	ENPP2	-8931
320	chr16	19413620	19413834	215	Promoter (2-3kb)	19410735	19499113	88379	79838	ENST00000396229.6	TMC5	2885
321	chrX	151870119	151871921	1803	Distal Intergenic	151904432	151911199	6768	105373368	ENST00000445330.1	MAGEA4-AS1	39278
322	chr12	95765934	95766942	1009	Intron (ENST00000343702.8/59277, intron 2 of 9)	95738089	95789948	51860	59277	ENST00000547980.1	NTN4	23006
323	chr16	64493459	64493837	379	Intron (ENST00000564046.1/ENST00000564046.1, intron 3 of 4)	64968434	64972949	4516	1009	ENST00000569095.1	CDH11	479112
324	chr4	12409453	12410566	1114	Distal Intergenic	12223482	12251286	27805	101929019	ENST00000505386.1	LINC02270	185971
325	chr6	6259020	6259234	215	Intron (ENST00000264870.7/2162, intron 4 of 14)	6206411	6224808	18398	2162	ENST00000445223.1	F13A1	-34212
326	chr16	90098695	90099835	1141	Promoter (2-3kb)	90102271	90137993	35723	100996541	ENST00000563357.1	FAM157C	-2436
327	chr3	106012633	106015306	2674	Distal Intergenic	105776522	105869552	93031	868	ENST00000443752.2	CBLB	-143081
328	chr1	228090736	228091317	582	Promoter (<=1kb)	228090488	228097453	6966	375	ENST00000490705.1	ARF1	248
329	chr8	42085705	42086034	330	Distal Intergenic	41929479	42052026	122548	7994	ENST00000265713.7	KAT6A	-33679
330	chr6	81806785	81807906	1122	Distal Intergenic	81813286	81814157	872	101928770	ENST00000441949.1	LINC01526	6251
331	chr5	146640544	146640994	451	Intron (ENST00000394409.7/5521, intron 5 of 8)	146590038	146600376	10339	5521	ENST00000512984.1	PPP2R2B	-40168
332	chr4	11633848	11636839	2992	Intron (ENST00000510095.5/ENST00000510095.5, intron 1 of 3)	11740948	11769468	28521	105374484	ENST00000506195.1	LINC02360	132629
333	chr13	22134882	22137147	2266	Intron (ENST00000631321.1/100506622, intron 1 of 1)	22107470	22274945	167476	100506622	ENST00000611481.1	LINC00540	27412
334	chr12	91492463	91492731	269	Distal Intergenic	91140484	91183123	42640	1634	ENST00000052754.9	DCN	-309340
335	chr4	101419313	101419527	215	Promoter (<=1kb)	101419961	102074812	654852	55024	ENST00000504592.5	BANK1	-434
336	chr4	21801950	21802384	435	Intron (ENST00000447367.6/80333, intron 1 of 7)	21843341	21853188	9848	359822	ENST00000627566.1	KCNIP4-IT1	50804
337	chr7	114229827	114230156	330	Intron (ENST00000412402.5/93986, intron 1 of 19)	114288019	114690120	402102	93986	ENST00000635109.1	FOXP2	-57863
338	chr1	166600690	166607229	6540	Promoter (<=1kb)	166603916	166625238	21323	116123	ENST00000477875.6	FMO9P	0
339	chr3	161038839	161039053	215	Intron (ENST00000498165.5/151742, intron 2 of 3)	161084991	161101167	16177	8706	ENST00000417187.1	B3GALNT1	62114
340	chr3	143960595	143962907	2313	Distal Intergenic	143971798	143992359	20562	205428	ENST00000315691.7	DIPK2A	-8891
341	chr5	133734670	133736473	1804	Distal Intergenic	133196455	133612564	416110	23105	ENST00000265342.11	FSTL4	-122106
342	chr6	56828704	56828997	294	Intron (ENST00000421834.6/667, intron 1 of 93)	56670488	56843146	172659	667	ENST00000521821.1	DST	14149
343	chr18	23693261	23696382	3122	Intron (ENST00000313654.13/3909, intron 1 of 74)	23689684	23954648	264965	3909	ENST00000399516.7	LAMA3	3577
344	chr5	120603017	120603231	215	Intron (ENST00000407149.6/51334, intron 1 of 1)	120617137	120686925	69789	51334	ENST00000446965.2	PRR16	-13906
345	chr13	110485741	110488316	2576	Exon (ENST00000360467.6/1284, exon 34 of 48)	110477948	110484107	6160	1284	ENST00000483683.2	COL4A2	7793
346	chr3	6570966	6572108	1143	Intron (ENST00000433639.1/ENST00000433639.1, intron 1 of 4)	6631689	6644894	13206	101927347	ENST00000455623.1	GRM7-AS3	72786
347	chr2	110311755	110312076	322	Distal Intergenic	110284853	110284943	91	100847033	ENST00000581415.1	MIR4436B2	26902
348	chr12	13097513	13103892	6380	Promoter (<=1kb)	13084823	13103645	18823	83445	ENST00000432710.6	GSG1	0
349	chr4	182447458	182450243	2786	Promoter (<=1kb)	182448999	182628875	179877	55714	ENST00000510504.1	TENM3	0
350	chr10	21431996	21432210	215	Distal Intergenic	21340233	21372950	32718	105376444	ENST00000433460.1	LINC02643	-59046
351	chr12	29259791	29260963	1173	Intron (ENST00000551451.5/55711, intron 1 of 2)	29270449	29307835	37387	55711	ENST00000552137.1	FAR2	-9486
352	chr17	41403313	41405280	1968	Promoter (<=1kb)	41402423	41425049	22627	100505782	ENST00000432258.1	LOC100505782	890
353	chr2	182294836	182295348	513	Intron (ENST00000435564.5/5136, intron 1 of 14)	182167887	182242063	74177	5136	ENST00000358139.6	PDE1A	-52773
354	chr21	37550678	37551769	1092	Distal Intergenic	37501326	37512064	10739	1859	ENST00000646351.1	DYRK1A	49352
355	chr2	30403365	30404707	1343	Distal Intergenic	30447226	30552549	105324	253558	ENST00000466477.5	LCLAT1	-42519
356	chr1	116624171	116625893	1723	Intron (ENST00000369483.5/3321, intron 2 of 11)	116616264	116646945	30682	3321	ENST00000481589.1	IGSF3	21052
357	chr8	8375679	8376659	981	Exon (ENST00000622241.1/157285, exon 2 of 5)	8317736	8381747	64012	157285	ENST00000622241.1	PRAG1	5088
358	chrX	44686916	44693231	6316	Distal Intergenic	44523639	44543001	19363	139341	ENST00000378045.4	FUNDC1	-143915
359	chr8	79760199	79761587	1389	Downstream (2-3kb)	79764720	79766475	1756	23462	ENST00000523976.1	HEY1	4888
360	chr8	37079331	37079668	338	Distal Intergenic	36928905	36931145	2241	157855	ENST00000518904.1	KCNU1	150426
361	chr5	34822667	34824018	1352	Promoter (1-2kb)	34826004	34830918	4915	26064	ENST00000507883.1	RAI14	-1986
362	chr3	176736950	176742633	5684	Intron (ENST00000428516.1/ENST00000428516.1, intron 2 of 4)	176814155	176817001	2847	101928684	ENST00000451289.1	LINC01209	74368
363	chr14	71804096	71804371	276	Distal Intergenic	71730192	71735593	5402	26037	ENST00000556959.1	SIPA1L1	73904
364	chr8	61590998	61592499	1502	Intron (ENST00000379454.8/444, intron 14 of 24)	61633125	61637986	4862	444	ENST00000519264.5	ASPH	45487
365	chr1	181441631	181441845	215	Intron (ENST00000524607.6/777, intron 2 of 11)	181483311	181652094	168784	777	ENST00000533229.1	CACNA1E	-41466
366	chr8	60922093	60923775	1683	Intron (ENST00000526936.5/ENST00000526936.5, intron 1 of 2)	60965802	60967775	1974	100130298	ENST00000525556.1	LOC100130298	44000
367	chr4	114479820	114480202	383	Distal Intergenic	114598455	114678224	79770	7368	ENST00000310836.10	UGT8	-118253
368	chr7	102124673	102126054	1382	3' UTR	102104437	102115670	11234	1523	ENST00000485792.1	CUX1	20236
369	chr8	128256696	128259285	2590	Distal Intergenic	128150116	128150188	73	100302281	ENST00000408334.1	MIR1208	106580
370	chrX	121390017	121390399	383	Distal Intergenic	121370972	121371053	82	100500869	ENST00000584290.1	MIR3672	19045
371	chr7	132836886	132837338	453	Intron (ENST00000453078.1/ENST00000453078.1, intron 1 of 3)	132758970	132760632	1663	100506937	ENST00000436379.1	LOC100506937	77916
372	chr11	67851297	67851760	464	Intron (ENST00000611822.1/ENST00000611822.1, intron 1 of 3)	67796683	67805336	8654	645332	ENST00000525180.1	FAM86C2P	-45961
373	chr5	120062865	120063247	383	Distal Intergenic	120464278	120687332	223055	51334	ENST00000407149.6	PRR16	-401031
374	chr13	79798915	79799228	314	Distal Intergenic	79804418	79805685	1268	102724076	ENST00000457858.1	LINC01038	-5190
375	chr2	49702446	49703741	1296	Distal Intergenic	49921743	49973939	52197	9378	ENST00000630656.1	NRXN1	270198
376	chr1	202189308	202190869	1562	Promoter (2-3kb)	202186855	202189455	2601	148713	ENST00000490575.1	PTPRVP	2453
377	chr19	13837989	13839790	1802	Promoter (1-2kb)	13836587	13836659	73	407010	ENST00000385245.1	MIR23A	-1330
378	chr10	52541081	52541295	215	Intron (ENST00000647908.1/101928687, intron 4 of 6)	52556702	52561105	4404	105378305	ENST00000448017.1	LOC105378305	19810
379	chr8	8341079	8341413	335	Intron (ENST00000622241.1/157285, intron 2 of 4)	8317736	8381747	64012	157285	ENST00000622241.1	PRAG1	40334
380	chr6	125866973	125870678	3706	Intron (ENST00000368357.7/135112, intron 4 of 16)	125899909	125927758	27850	135112	ENST00000433571.2	NCOA7	-29231
381	chr21	17740919	17743519	2601	Distal Intergenic	17777404	17792509	15106	246312	ENST00000430401.5	C21orf91-OT1	48990
382	chrX	13717803	13722747	4945	Promoter (<=1kb)	13715497	13722240	6744	6399	ENST00000380578.1	TRAPPC2	0
383	chr4	147829082	147833515	4434	Intron (ENST00000510379.1/79658, intron 3 of 4)	147860983	148072776	211794	79658	ENST00000506054.5	ARHGAP10	-27468
384	chr19	47788964	47790705	1742	Distal Intergenic	47781080	47784399	3320	6415	ENST00000599627.1	SELENOW	7884
385	chr9	6776557	6781935	5379	Intron (ENST00000536108.5/23081, intron 1 of 17)	6758143	7077263	319121	23081	ENST00000543771.5	KDM4C	18414
386	chrX	12944230	12944556	327	Distal Intergenic	12975108	12977227	2120	7114	ENST00000451311.6	TMSB4X	-30552
387	chr2	215456895	215462524	5630	Exon (ENST00000447835.1/102724849, exon 2 of 4)	215453707	215463871	10165	102724849	ENST00000447835.1	LOC102724849	3188
388	chr19	57305077	57305291	215	Exon (ENST00000593427.1/ENST00000593427.1, exon 1 of 1)	57320509	57330776	10268	125919	ENST00000321545.4	ZNF543	-15218
389	chr7	32513721	32518339	4619	Intron (ENST00000485228.1/23080, intron 1 of 2)	32495564	32559958	64395	23080	ENST00000640103.1	AVL9	18157
390	chr2	166572842	166574102	1261	Distal Intergenic	166440583	166494326	53744	6332	ENST00000419992.6	SCN7A	-78516
391	chr8	92251072	92251786	715	Distal Intergenic	92014798	92103286	88489	862	ENST00000518832.1	RUNX1T1	-147786
392	chr9	68998018	68998748	731	Intron (ENST00000541509.5/8395, intron 13 of 13)	69012529	69014113	1585	5568	ENST00000377276.4	PRKACG	15365
393	chr17	6590710	6593707	2998	Promoter (1-2kb)	6578148	6594999	16852	9851	ENST00000576281.5	KIAA0753	1292
394	chr6	16190561	16191237	677	Distal Intergenic	16238580	16295549	56970	2766	ENST00000259727.4	GMPR	-47343
395	chr4	74613272	74613908	637	Distal Intergenic	74746379	74770156	23778	685	ENST00000512743.1	BTC	156248
396	chr18	57980339	57981641	1303	Distal Intergenic	58044367	58396574	352208	23327	ENST00000356462.10	NEDD4L	-62726
397	chr18	65876097	65876426	330	Intron (ENST00000323011.7/1005, intron 11 of 11)	65763008	65803810	40803	1005	ENST00000581601.1	CDH7	113089
398	chr9	88431629	88431843	215	Intron (ENST00000375859.3/10927, intron 2 of 5)	88389371	88468477	79107	10927	ENST00000483785.1	SPIN1	42258
399	chr14	85436356	85439064	2709	Intron (ENST00000557547.1/ENST00000557547.1, intron 1 of 4)	85393948	85420052	26105	100996280	ENST00000557155.1	LINC00911	42408
400	chr1	5355055	5355269	215	Distal Intergenic	5862672	5862741	70	100616421	ENST00000582517.1	MIR4689	507472
401	chr1	109369892	109374274	4383	Promoter (<=1kb)	109368478	109369589	1112	6272	ENST00000495777.5	SORT1	-303
402	chr17	64391564	64391778	215	Promoter (<=1kb)	64319415	64390878	71464	5175	ENST00000563924.5	PECAM1	-686
403	chr15	37080317	37082997	2681	Intron (ENST00000561208.5/4212, intron 7 of 11)	37083770	37094029	10260	4212	ENST00000561422.1	MEIS2	11032
404	chr22	18801757	18802025	269	Intron (ENST00000412448.5/2679, intron 1 of 14)	18773665	18805479	31815	2679	ENST00000412448.5	GGT3P	3454
405	chr10	21139199	21139521	323	Intron (ENST00000417816.2/10529, intron 2 of 6)	21126086	21146508	20423	387638	ENST00000647558.1	C10orf113	6987
406	chr6	36313222	36316756	3535	3' UTR	36315757	36336885	21129	389384	ENST00000437635.2	C6orf222	20129
407	chr12	10715782	10724709	8928	Promoter (<=1kb)	10699089	10723307	24219	8531	ENST00000279550.11	YBX3	0
408	chr8	89099013	89101904	2892	Distal Intergenic	89720944	89722350	1407	101929709	ENST00000523995.1	LOC101929709	620446
409	chr15	68012105	68013983	1879	Distal Intergenic	68054179	68193846	139668	8554	ENST00000249636.10	PIAS1	-40196
410	chr18	34710283	34711655	1373	Promoter (<=1kb)	34710284	34868812	158529	1837	ENST00000348997.9	DTNA	0
411	chr2	149064125	149065548	1424	Intron (ENST00000473800.1/130576, intron 1 of 2)	149077522	149215262	137741	130576	ENST00000409029.5	LYPD6B	-11974
412	chr12	56261117	56262617	1501	Promoter (2-3kb)	56237807	56258391	20585	283373	ENST00000267116.7	ANKRD52	-2726
413	chr7	134834788	134835601	814	Intron (ENST00000417172.5/800, intron 1 of 13)	134843884	134900053	56170	800	ENST00000489019.6	CALD1	-8283
414	chr2	19868450	19869307	858	Promoter (<=1kb)	19868860	19877393	8534	400946	ENST00000607100.5	LINC00954	0
415	chr10	83611762	83613118	1357	Distal Intergenic	83672406	83675439	3034	105378397	ENST00000441776.1	LINC02650	62321
416	chr2	18209989	18210203	215	Intron (ENST00000465292.5/3790, intron 3 of 4)	17879383	17931231	51849	3790	ENST00000419802.1	KCNS3	330606
417	chr9	133267714	133271017	3304	Intron (ENST00000453660.4/28, intron 1 of 6)	133250732	133275214	24483	28	ENST00000647353.1	ABO	4197
418	chr3	125695376	125696044	669	Distal Intergenic	125774714	125797953	23240	105374312	ENST00000610060.1	LOC105374312	-78670
419	chr1	218588596	218590602	2007	Distal Intergenic	218524840	218525978	1139	440714	ENST00000491260.2	C1orf143	63756
420	chr8	126624936	126625150	215	Intron (ENST00000519880.5/ENST00000519880.5, intron 2 of 4)	126552442	126558393	5952	157638	ENST00000304916.3	LRATD2	-66543
421	chr14	45249901	45250920	1020	Promoter (2-3kb)	45246821	45253177	6357	55320	ENST00000451174.1	MIS18BP1	2257
422	chr1	145750072	145750407	336	Exon (ENST00000582693.4/27246, exon 7 of 9)	145728328	145738493	10166	11126	ENST00000584442.2	CD160	21744
423	chr4	137663535	137664924	1390	Distal Intergenic	137545731	137603430	57700	105377443	ENST00000507365.1	LINC02172	117804
424	chr16	47733091	47733305	215	Intron (ENST00000565451.5/101927132, intron 1 of 2)	47724568	47863599	139032	101927132	ENST00000565451.5	LINC02133	8523
425	chr12	22593675	22594469	795	Distal Intergenic	22609228	22625015	15788	105369691	ENST00000542076.1	LOC105369691	30546
426	chr5	156928131	156929063	933	Intron (ENST00000274532.6/91937, intron 5 of 8)	156919355	156935676	16322	91937	ENST00000406964.5	TIMD4	6613
427	chr9	9996471	9997006	536	Intron (ENST00000381196.8/5789, intron 1 of 42)	8314246	10033790	1719545	5789	ENST00000381196.8	PTPRD	36784
428	chr1	184545878	184546309	432	Exon (ENST00000489143.6/81563, exon 3 of 5)	184539993	184592248	52256	81563	ENST00000489143.6	C1orf21	5885
429	chr15	60352873	60353720	848	Promoter (1-2kb)	60349075	60351553	2479	302	ENST00000559647.1	ANXA2	-1320
430	chr10	23795154	23795789	636	Intron (ENST00000376462.5/56243, intron 1 of 18)	23694782	23877495	182714	56243	ENST00000481700.1	KIAA1217	100372
431	chr1	226180286	226183253	2968	Intron (ENST00000366812.5/64746, intron 1 of 7)	226144679	226186730	42052	64746	ENST00000366812.5	ACBD3	3477
432	chr22	28231400	28232106	707	Intron (ENST00000612946.4/23331, intron 3 of 20)	27978014	28306645	328632	23331	ENST00000612946.4	TTC28	74539
433	chr2	85255554	85256965	1412	Intron (ENST00000282111.3/83439, intron 3 of 11)	85213623	85302494	88872	102724579	ENST00000442813.1	LOC102724579	41931
434	chr4	138053254	138054702	1449	Promoter (2-3kb)	138057464	138098717	41254	641364	ENST00000510066.5	SLC7A11-AS1	-2762
435	chr12	99343503	99344519	1017	Promoter (<=1kb)	99246436	99343790	97355	56899	ENST00000550833.1	ANKS1B	0
436	chr7	20214033	20222825	8793	Promoter (<=1kb)	20217577	20221681	4105	100506098	ENST00000439058.5	LOC100506098	0
437	chr1	41370128	41372777	2650	Promoter (2-3kb)	41375004	41375669	666	101929901	ENST00000429109.1	LOC101929901	2892
438	chr8	24217755	24219659	1905	Distal Intergenic	24294040	24359018	64979	10863	ENST00000265769.8	ADAM28	-74381
439	chr16	86676015	86676952	938	Distal Intergenic	86710122	86738461	28340	102724344	ENST00000647615.1	LINC02188	-33170
440	chr9	97801666	97804273	2608	Exon (ENST00000649461.1/101928337, exon 5 of 11)	97722800	97810039	87240	101928337	ENST00000430058.2	PTCSC2	5766
441	chr15	63088323	63089425	1103	Distal Intergenic	63063804	63066093	2290	7168	ENST00000560131.1	TPM1	24519
442	chr15	70438734	70440243	1510	Distal Intergenic	70503907	70505928	2022	105370880	ENST00000559752.1	LINC02205	65685
443	chr16	1645229	1647451	2223	Exon (ENST00000454337.1/57585, exon 4 of 23)	1632259	1686715	54457	57585	ENST00000454337.1	CRAMP1	12970
444	chr17	17025118	17030309	5192	Distal Intergenic	17042545	17126853	84309	23164	ENST00000577514.5	MPRIP	-12236
445	chr16	59214195	59215139	945	Distal Intergenic	58707131	58734357	27227	2806	ENST00000245206.9	GOT2	-479838
446	chr6	55082426	55082809	384	Distal Intergenic	55106460	55282592	176133	3062	ENST00000615358.4	HCRTR2	-23651
447	chr14	58628569	58629028	460	Distal Intergenic	58633967	58645472	11506	51339	ENST00000555845.5	DACT1	-4939
448	chr12	65878781	65879048	268	Promoter (2-3kb)	65866804	65881578	14775	100129940	ENST00000536648.5	HMGA2-AS1	2530
449	chr22	24660399	24661653	1255	Distal Intergenic	24645171	24651657	6487	646074	ENST00000639904.1	POM121L10P	-8742
450	chr6	48135451	48135950	500	Distal Intergenic	47878028	48068689	190662	442213	ENST00000339488.8	PTCHD4	-66762
451	chr3	130789480	130790703	1224	Distal Intergenic	130678935	130746829	67895	30849	ENST00000356763.7	PIK3R4	-42651
452	chr5	169354429	169355725	1297	Distal Intergenic	168661740	169301129	639390	6586	ENST00000519560.5	SLIT3	-53300
453	chr4	16081612	16084569	2958	Promoter (<=1kb)	15968228	16084378	116151	8842	ENST00000505450.5	PROM1	0
454	chr6	132623405	132623801	397	Promoter (<=1kb)	132617150	132624275	7126	9287	ENST00000367931.1	TAAR2	474
455	chr6	140535585	140540183	4599	Distal Intergenic	140683814	140683883	70	100616180	ENST00000583434.1	MIR4465	-143631
456	chr11	8818089	8818579	491	Intron (ENST00000534127.5/6764, intron 3 of 22)	8807826	8811580	3755	6764	ENST00000531237.1	ST5	-6509
457	chrX	123694364	123696434	2071	Promoter (1-2kb)	123610921	123697687	86767	57187	ENST00000491737.5	THOC2	1253
458	chr10	115883	117307	1425	Distal Intergenic	134465	237651	103187	10771	ENST00000439456.5	ZMYND11	-17158
459	chr1	115975623	115979151	3529	Promoter (<=1kb)	115976498	116070054	93557	55356	ENST00000369503.8	SLC22A15	0
460	chr11	15764486	15766489	2004	Distal Intergenic	15643885	15705368	61484	102724957	ENST00000532242.1	LOC102724957	120601
461	chr6	33052125	33054292	2168	Distal Intergenic	33067660	33069248	1589	3113	ENST00000437811.1	HLA-DPA1	14956
462	chr16	11107062	11107970	909	Intron (ENST00000409790.5/23274, intron 19 of 23)	11123743	11157225	33483	23274	ENST00000428742.6	CLEC16A	-15773
463	chrX	38991272	38992225	954	Distal Intergenic	38801568	38803883	2316	100874211	ENST00000436893.1	MID1IP1-AS1	-187389
464	chr4	54731708	54732593	886	Promoter (2-3kb)	54729292	54733401	4110	3815	ENST00000512959.1	KIT	2416
465	chr7	45347583	45347988	406	Distal Intergenic	45157829	45186302	28474	10268	ENST00000481345.1	RAMP3	189754
466	chr10	99324587	99326528	1942	Promoter (2-3kb)	99329099	99394330	65232	26507	ENST00000356713.4	CNNM1	-2571
467	chr21	35366462	35366676	215	Intron (ENST00000475045.6/101928269, intron 9 of 12)	35435661	35465329	29669	100506403	ENST00000494829.1	LOC100506403	98653
468	chr4	24593933	24600016	6084	Distal Intergenic	24527475	24584550	57076	1665	ENST00000336812.4	DHX15	-9383
469	chr9	76089665	76092394	2730	Intron (ENST00000545128.5/5125, intron 7 of 36)	76095977	76358970	262994	5125	ENST00000424854.6	PCSK5	-3583
470	chr1	177618891	177622867	3977	Distal Intergenic	177700524	177710330	9807	101928778	ENST00000427173.1	LINC01741	-77657
471	chr3	32758002	32759532	1531	3' UTR	32764132	32769964	5833	25904	ENST00000481526.5	CNOT10	-4600
472	chr17	62170665	62171374	710	Distal Intergenic	62265017	62274115	9099	440452	ENST00000577902.6	TBC1D3P2	102741
473	chr1	222239947	222241569	1623	Intron (ENST00000416510.1/ENST00000416510.1, intron 2 of 3)	221913648	221978523	64876	105372950	ENST00000412445.1	LINC02257	-261424
474	chr11	129020858	129025395	4538	Promoter (<=1kb)	128967947	129024193	56247	9743	ENST00000392657.7	ARHGAP32	0
475	chr6	30985049	30985593	545	Promoter (1-2kb)	30983718	30989903	6186	394263	ENST00000376296.3	MUC21	1331
476	chr10	7318715	7319037	323	Intron (ENST00000361972.8/57713, intron 4 of 20)	7348142	7408745	60604	57713	ENST00000379711.2	SFMBT2	89708
477	chrX	38051021	38053103	2083	Intron (ENST00000465127.1/7102, intron 3 of 8)	38033534	38128819	95286	94122	ENST00000456733.2	SYTL5	17487
478	chr4	146976665	146976987	323	Distal Intergenic	146707033	146945882	238850	83894	ENST00000504425.5	TTC29	-30783
479	chr6	47633152	47635754	2603	Distal Intergenic	47656436	47683528	27093	222611	ENST00000507065.5	ADGRF2	-20682
480	chr18	31645312	31650624	5313	Exon (ENST00000306851.9/9331, exon 4 of 9)	31622247	31658464	36218	9331	ENST00000578114.1	B4GALT6	7840
481	chr20	46458909	46459903	995	Promoter (1-2kb)	46455955	46457085	1131	100130934	ENST00000641770.1	ZNF663P	-1824
482	chr22	27019337	27021075	1739	Exon (ENST00000623027.1/ENST00000623027.1, exon 1 of 1)	27048144	27060518	12375	284898	ENST00000453934.1	LOC284898	39443
483	chr4	138237915	138244436	6522	Promoter (<=1kb)	138164097	138242349	78253	23657	ENST00000280612.9	SLC7A11	0
484	chr18	57497727	57498108	382	Distal Intergenic	57444376	57476760	32385	9480	ENST00000481727.1	ONECUT2	53351
485	chr1	242211560	242211991	432	Intron (ENST00000536534.6/200150, intron 5 of 9)	242235462	242265433	29972	200150	ENST00000474177.1	PLD5	53442
486	chr21	32492536	32494285	1750	Promoter (<=1kb)	32493653	32514880	21228	59271	ENST00000496615.5	EVA1C	0
487	chr12	80216952	80220266	3315	Exon (ENST00000643417.1/283310, exon 8 of 23)	80209453	80379090	169638	283310	ENST00000458043.6	OTOGL	7499
488	chr6	134304514	134305062	549	Intron (ENST00000367858.9/6446, intron 1 of 13)	134259793	134317629	57837	6446	ENST00000524929.1	SGK1	12567
489	chr21	28283137	28284931	1795	Distal Intergenic	28116094	28228667	112574	101927973	ENST00000453420.5	LINC01695	-54470
490	chr9	86599889	86600243	355	Distal Intergenic	86287733	86354454	66722	79670	ENST00000375960.6	TUT7	-245435
491	chr8	40758019	40758901	883	Intron (ENST00000315769.11/79698, intron 3 of 5)	40696996	40786782	89787	79698	ENST00000518242.5	ZMAT4	27881
492	chr3	184643555	184646746	3192	Distal Intergenic	184579748	184580700	953	2049	ENST00000473079.1	EPHB3	63807
493	chr11	19236964	19238274	1311	Promoter (2-3kb)	19224535	19240951	16417	79733	ENST00000250024.8	E2F8	2677
494	chr5	39532046	39533336	1291	Distal Intergenic	39521519	39524703	3185	101926940	ENST00000603514.1	LINC02104	10527
495	chr7	2851338	2851552	215	Distal Intergenic	2728112	2844324	116213	2768	ENST00000275364.7	GNA12	-7014
496	chr2	150413952	150414275	324	Distal Intergenic	150470141	150471960	1820	390	ENST00000473639.1	RND3	57685
497	chr4	149886330	149886663	334	Intron (ENST00000508106.5/285423, intron 1 of 6)	149587990	149896233	308244	285423	ENST00000508106.5	IQCM	9570
498	chr5	171520808	171522502	1695	Distal Intergenic	171419656	171457623	37968	8817	ENST00000274625.5	FGF18	101152
499	chr2	36501001	36501215	215	Intron (ENST00000280527.6/51232, intron 8 of 16)	36513690	36529512	15823	51232	ENST00000413985.1	CRIM1	-12475
500	chr4	40267487	40267701	215	Distal Intergenic	40316485	40330419	13935	101060498	ENST00000510551.1	LINC02265	-48784
501	chr16	75640053	75642005	1953	Promoter (<=1kb)	75639782	75641602	1821	3735	ENST00000565738.1	KARS	0
502	chr4	133623933	133625378	1446	Distal Intergenic	133154893	133208606	53714	57575	ENST00000511112.2	PCDH10	469040
503	chr3	116425036	116425322	287	Intron (ENST00000490035.6/4045, intron 1 of 6)	115809794	116444983	635190	4045	ENST00000333617.8	LSAMP	19661
504	chr4	158314537	158315594	1058	Promoter (<=1kb)	158315311	158652212	336902	59350	ENST00000460056.6	RXFP1	0
505	chr5	121252219	121252546	328	Intron (ENST00000599562.5/ENST00000599562.5, intron 2 of 5)	121313977	121325480	11504	102467226	ENST00000609647.5	LOC102467226	-61431
506	chr4	54625208	54625422	215	Distal Intergenic	54603211	54607131	3921	339978	ENST00000508484.1	LINC02260	-18077
507	chr6	17114923	17116748	1826	Exon (ENST00000536551.5/401236, exon 2 of 5)	17110495	17130675	20181	401236	ENST00000354384.5	STMND1	4428
508	chr8	211746	216214	4469	Exon (ENST00000606975.1/644128, exon 3 of 3)	232137	245287	13151	169270	ENST00000521145.5	ZNF596	-15923
509	chr15	39212931	39214223	1293	Intron (ENST00000561058.5/ENST00000561058.5, intron 1 of 5)	39250684	39254845	4162	400360	ENST00000625107.1	C15orf54	-36461
510	chr11	13114475	13114897	423	Intron (ENST00000531136.1/ENST00000531136.1, intron 1 of 1)	13009577	13012106	2530	644943	ENST00000529419.2	RASSF10	104898
511	chr21	42100914	42103993	3080	3' UTR	42102134	42108534	6401	150147	ENST00000329015.2	UMODL1-AS1	4541
512	chr2	206614640	206615841	1202	Intron (ENST00000264377.7/8745, intron 25 of 25)	206594835	206617855	23021	8745	ENST00000444281.1	ADAM23	19805
513	chr21	35326492	35326706	215	Intron (ENST00000475045.6/101928269, intron 9 of 12)	35435661	35465329	29669	100506403	ENST00000494829.1	LOC100506403	138623
514	chr10	109974100	109980180	6081	Intron (ENST00000369655.3/100505933, intron 1 of 4)	109996368	110118608	122241	120	ENST00000468251.5	ADD3	-16188
515	chr13	73215183	73218311	3129	Distal Intergenic	73075015	73075778	764	688	ENST00000464404.2	KLF5	140168
516	chr3	101183084	101183298	215	Distal Intergenic	101222546	101320560	98015	50939	ENST00000193391.7	IMPG2	137262
517	chr2	238390032	238390837	806	Intron (ENST00000391993.7/26146, intron 13 of 14)	238397422	238398971	1550	26146	ENST00000483951.1	TRAF3IP1	-6585
518	chr13	69970422	69970705	284	Intron (ENST00000377844.8/57626, intron 2 of 10)	70107213	70139429	32217	6315	ENST00000414504.6	ATXN8OS	-136508
519	chr4	183797109	183798154	1046	Promoter (<=1kb)	183797692	184017378	219687	56977	ENST00000513034.3	STOX2	0
520	chr13	29901591	29903092	1502	Distal Intergenic	29872613	29888405	15793	100874059	ENST00000453470.2	LINC00297	-13186
521	chr7	88183372	88183639	268	Promoter (1-2kb)	88182005	88186422	4418	53616	ENST00000476330.1	ADAM22	1367
522	chr8	106208982	106209250	269	Distal Intergenic	106270144	106272899	2756	55074	ENST00000521369.2	OXR1	-60894
523	chr13	106349938	106350152	215	Distal Intergenic	106374477	106377791	3315	728192	ENST00000643760.1	LINC00460	-24325
524	chr10	72685999	72690525	4527	Promoter (1-2kb)	72692131	72887694	195564	90550	ENST00000373053.7	MCU	-1606
525	chr1	246227513	246227887	375	Intron (ENST00000630181.2/64754, intron 5 of 11)	245858562	246193727	335166	64754	ENST00000391836.3	SMYD3	-33786
526	chr2	54121733	54123699	1967	Promoter (<=1kb)	54123179	54305019	181841	98	ENST00000606865.1	ACYP2	0
527	chr21	39632057	39634592	2536	Intron (ENST00000380620.8/10317, intron 2 of 4)	39612940	39662888	49949	10317	ENST00000615480.4	B3GALT5	19117
528	chr7	12303395	12303748	354	Distal Intergenic	12330887	12333726	2840	221806	ENST00000485526.1	VWDE	29978
529	chr4	113747051	113748866	1816	Intron (ENST00000394524.7/817, intron 2 of 17)	113454105	113761068	306964	817	ENST00000342666.9	CAMK2D	12202
530	chr1	112857900	112858302	403	Intron (ENST00000456651.1/ENST00000456651.1, intron 1 of 2)	112820174	112850643	30470	100996702	ENST00000401018.5	LINC01356	-7257
531	chr11	67996971	67997185	215	Promoter (<=1kb)	67991818	67995980	4163	81622	ENST00000525368.1	UNC93B1	-991
532	chr8	94657364	94658057	694	Intron (ENST00000423620.6/54845, intron 4 of 14)	94665157	94668365	3209	54845	ENST00000517556.1	ESRP1	-7100
533	chrX	54321062	54321552	491	Intron (ENST00000375169.7/65267, intron 2 of 22)	54198324	54333673	135350	65267	ENST00000375159.6	WNK3	12121
534	chr2	232455428	232455932	505	Promoter (<=1kb)	232456123	232460032	3910	248	ENST00000295463.3	ALPI	-191
535	chr4	82394130	82395979	1850	Distal Intergenic	82357437	82374503	17067	3184	ENST00000515432.1	HNRNPD	-19627
536	chr3	112691827	112694506	2680	Distal Intergenic	112640721	112649447	8727	151887	ENST00000473959.5	CCDC80	-42380
537	chr2	139469200	139469600	401	Distal Intergenic	138897151	138898098	948	647012	ENST00000438766.1	YY1P2	572049
538	chr3	151108999	151109930	932	Intron (ENST00000469768.1/116931, intron 1 of 2)	151086894	151433742	346849	116931	ENST00000273432.8	MED12L	22105
539	chr19	35308636	35310339	1704	Promoter (<=1kb)	35309806	35312009	2204	4099	ENST00000593348.1	MAG	0
540	chr12	122722447	122722796	350	Distal Intergenic	122714756	122716892	2137	8843	ENST00000528880.2	HCAR3	-5555
541	chr3	161343747	161343961	215	Downstream (<1kb)	161345775	161371501	25727	165679	ENST00000497137.1	SPTSSB	27540
542	chr12	95340488	95340811	324	Exon (ENST00000636165.1/ENST00000636165.1, exon 7 of 8)	95309923	95309984	62	100500802	ENST00000579373.1	MIR3685	30565
543	chr2	234306366	234306643	278	Distal Intergenic	234444590	234454595	10006	105373934	ENST00000439798.1	LINC01891	147952
544	chr2	160141478	160142428	951	3' UTR	160101565	160112110	10546	3694	ENST00000475438.1	ITGB6	-29368
545	chr6	21277118	21277638	521	Distal Intergenic	21200812	21231441	30630	54901	ENST00000476517.1	CDKAL1	76306
546	chr5	56529878	56536987	7110	Promoter (<=1kb)	56511722	56535230	23509	101928448	ENST00000611197.1	C5orf67	0
547	chr9	91873756	91874728	973	Intron (ENST00000375715.5/4920, intron 1 of 12)	91722602	91887199	164598	4920	ENST00000550066.5	ROR2	12471
548	chr5	12105	12538	434	Distal Intergenic	92151	189970	97820	153478	ENST00000637938.1	PLEKHG4B	-79613
549	chr2	46070982	46075239	4258	Promoter (<=1kb)	46073437	46151201	77765	5581	ENST00000469753.5	PRKCE	0
550	chr4	143343654	143349227	5574	Promoter (<=1kb)	143343460	143343535	76	100423017	ENST00000579145.1	MIR3139	194
551	chr2	159225883	159227071	1189	Promoter (1-2kb)	159224393	159232659	8267	85461	ENST00000496406.1	TANC1	1490
552	chr3	13538209	13538423	215	Distal Intergenic	13549131	13638422	89292	2199	ENST00000404922.7	FBLN2	-10708
553	chr1	14996766	14997208	443	Intron (ENST00000636203.1/23254, intron 4 of 16)	14945919	15065797	119879	23254	ENST00000400797.3	KAZN	50847
554	chr10	126569309	126570793	1485	Intron (ENST00000488181.2/118611, intron 2 of 3)	126502660	126524823	22164	118611	ENST00000368674.5	C10orf90	-44486
555	chr3	190169009	190169389	381	Distal Intergenic	189956831	190122437	165607	55214	ENST00000427335.6	P3H2	-46572
556	chr12	64836076	64836747	672	Exon (ENST00000542120.5/23329, exon 7 of 13)	64824670	64836511	11842	23329	ENST00000539120.1	TBC1D30	11406
557	chr6	56787424	56787638	215	Promoter (1-2kb)	56670675	56785879	115205	667	ENST00000522538.5	DST	-1545
558	chr3	94961593	94962104	512	Promoter (<=1kb)	94962930	94991243	28314	255025	ENST00000466560.1	LINC00879	-826
559	chr6	47663312	47666240	2929	5' UTR	47656590	47697797	41208	222611	ENST00000467205.6	ADGRF2	6722
560	chr1	64754039	64756363	2325	Intron (ENST00000294428.7/55225, intron 1 of 11)	64745095	64833232	88138	55225	ENST00000371072.8	RAVER2	8944
561	chr3	3625303	3625517	215	Intron (ENST00000420000.6/ENST00000420000.6, intron 2 of 4)	3799437	3847703	48267	57633	ENST00000319331.3	LRRN1	-173920
562	chr7	138312375	138318872	6498	Distal Intergenic	138460334	138589993	129660	8805	ENST00000343526.8	TRIM24	-141462
563	chrX	19841096	19841624	529	Intron (ENST00000397821.7/30011, intron 1 of 17)	19535693	19799751	264059	30011	ENST00000379698.8	SH3KBP1	-41345
564	chr21	43438536	43440849	2314	Distal Intergenic	43446601	43453893	7293	284836	ENST00000448049.1	LINC00319	-5752
565	chr11	119590395	119590791	397	Distal Intergenic	119674382	119675669	1288	5818	ENST00000524429.2	NECTIN1	84878
566	chr10	46360469	46361086	618	Distal Intergenic	46369113	46373508	4396	100132929	ENST00000623997.3	FAM25BP	-8027
567	chr12	69002522	69003290	769	Distal Intergenic	68957590	68971570	13981	1368	ENST00000549691.1	CPM	-30952
568	chr14	62588734	62588948	215	Distal Intergenic	62134149	62139973	5825	101954204	ENST00000555156.1	LINC00644	-448761
569	chr18	2845945	2848268	2324	Promoter (<=1kb)	2847030	2915993	68964	84034	ENST00000254528.3	EMILIN2	0
570	chr22	31578932	31581273	2342	Promoter (<=1kb)	31580088	31583969	3882	9814	ENST00000467357.1	SFI1	0
571	chr8	101508124	101509262	1139	Intron (ENST00000251808.7/79977, intron 1 of 15)	101492758	101666893	174136	79977	ENST00000395927.1	GRHL2	15366
572	chr6	13912694	13915073	2380	Distal Intergenic	13924446	13977272	52827	221687	ENST00000488763.5	RNF182	-9373
573	chr5	138408717	138409044	328	Intron (ENST00000314358.9/51780, intron 11 of 23)	138417808	138420785	2978	51780	ENST00000508386.1	KDM3B	-8764
574	chr11	86388101	86388315	215	Intron (ENST00000354755.5/60494, intron 3 of 13)	86395111	86412438	17328	60494	ENST00000530845.5	CCDC81	-6796
575	chr2	91652919	91653186	268	Promoter (2-3kb)	91636688	91655378	18691	654342	ENST00000608018.5	LSP1P4	2192
576	chr12	132466178	132466392	215	Distal Intergenic	132489551	132585188	95638	57666	ENST00000434748.2	FBRSL1	-23159
577	chr6	17712063	17712474	412	Distal Intergenic	17615035	17706834	91800	9972	ENST00000613258.4	NUP153	-5229
578	chr3	154365600	154368132	2533	Intron (ENST00000389740.2/344758, intron 3 of 3)	154272546	154324497	51952	170506	ENST00000496811.5	DHX36	-41103
579	chr2	225463313	225463641	329	Intron (ENST00000636099.1/57624, intron 3 of 6)	225400886	225654018	253133	57624	ENST00000272907.7	NYAP2	62427
580	chr8	124279590	124279804	215	Distal Intergenic	124192671	124247398	54728	101927588	ENST00000523703.1	LOC101927588	-32192
581	chr5	16179263	16179750	488	Promoter (<=1kb)	16067139	16179775	112637	441061	ENST00000332432.8	2011-03-01	25
582	chr2	215277395	215278127	733	Exon (ENST00000448086.1/ENST00000448086.1, exon 2 of 3)	215311817	215349763	37947	471	ENST00000236959.13	ATIC	-33690
583	chr22	32621139	32623965	2827	Intron (ENST00000358763.6/8224, intron 6 of 13)	32527672	32541716	14045	8224	ENST00000619146.1	SYN3	-79423
584	chr3	132133229	132137917	4689	Intron (ENST00000512055.5/131034, intron 2 of 19)	132034747	132040250	5504	131034	ENST00000506687.5	CPNE4	-92979
585	chr4	124928620	124931015	2396	Distal Intergenic	124667359	124712732	45374	57182	ENST00000515641.1	ANKRD50	-215888
586	chr1	172382863	172384659	1797	Promoter (2-3kb)	172387188	172389222	2035	26052	ENST00000491124.1	DNM3	-2529
587	chr16	63612209	63615102	2894	Intron (ENST00000568932.5/ENST00000568932.5, intron 1 of 3)	64968434	64972949	4516	1009	ENST00000569095.1	CDH11	1357847
588	chr3	185643396	185643722	327	Downstream (<1kb)	185646880	185649523	2644	10644	ENST00000464166.1	IGF2BP2	5801
589	chr11	69441899	69444966	3068	Exon (ENST00000544004.1/ENST00000544004.1, exon 1 of 2)	69425690	69429621	3932	102724265	ENST00000545202.1	LOC102724265	16209
590	chr17	41519718	41531620	11903	Promoter (<=1kb)	41513743	41522413	8671	3866	ENST00000254043.7	KRT15	0
591	chr13	106119168	106119382	215	Distal Intergenic	106374477	106377791	3315	728192	ENST00000643760.1	LINC00460	-255095
592	chr3	102078096	102080526	2431	Distal Intergenic	102099244	102477677	378434	131368	ENST00000491959.5	ZPLD1	-18718
593	chr4	4031301	4032459	1159	Distal Intergenic	3943274	3955419	12146	348926	ENST00000510506.5	FAM86EP	-75882
594	chr20	45137538	45139772	2235	Exon (ENST00000636811.1/ENST00000636811.1, exon 1 of 3)	45123425	45124465	1041	128488	ENST00000372785.3	WFDC12	-13073
595	chr17	78350274	78361950	11677	Promoter (<=1kb)	78360453	78373911	13459	101928674	ENST00000592569.1	LOC101928674	0
596	chr5	160283985	160284199	215	Promoter (2-3kb)	160251664	160281389	29726	79616	ENST00000541762.5	CCNJL	-2596
597	chr4	93877553	93877889	337	Distal Intergenic	93828753	93830964	2212	474	ENST00000306011.4	ATOH1	48800
598	chr22	48137987	48138201	215	Distal Intergenic	48274364	48274415	52	100422916	ENST00000578320.1	MIR3201	-136163
599	chr19	58033313	58034858	1546	Promoter (<=1kb)	58034032	58038444	4413	284312	ENST00000391700.5	ZSCAN1	0
600	chr13	110368463	110368734	272	Intron (ENST00000400163.7/1284, intron 4 of 4)	110340958	110341029	72	102465872	ENST00000616690.1	MIR8073	27505
601	chr7	48473285	48474001	717	Intron (ENST00000435803.5/154664, intron 45 of 61)	48455063	48647496	192434	154664	ENST00000411975.5	ABCA13	18222
602	chr18	7561694	7562305	612	Distal Intergenic	7566782	8406668	839887	5797	ENST00000580170.5	PTPRM	-4477
603	chrX	130297203	130297481	279	Distal Intergenic	130202711	130268899	66189	55609	ENST00000370978.8	ZNF280C	-28304
604	chr6	21367172	21368575	1404	Distal Intergenic	21486061	21511895	25835	100874531	ENST00000630914.1	LINC00581	143320
605	chrX	134827717	134827931	215	Intron (ENST00000463842.2/159091, intron 3 of 9)	134835095	134854562	19468	159091	ENST00000645256.1	FAM122C	-7164
606	chr19	53889400	53890012	613	5' UTR	53882229	53889979	7751	5582	ENST00000419486.1	PRKCG	7171
607	chr2	185162706	185162920	215	Distal Intergenic	184866365	184939489	73125	91752	ENST00000613975.1	ZNF804A	296341
608	chr9	66813936	66814203	268	Distal Intergenic	66856426	66919359	62934	26149	ENST00000619925.4	ZNF658	-42223
609	chr17	80619163	80619881	719	Intron (ENST00000574767.5/57521, intron 1 of 11)	80545666	80593805	48140	57521	ENST00000573746.1	RPTOR	73497
610	chr5	92017167	92018731	1565	Distal Intergenic	91368724	91383359	14636	57561	ENST00000265138.3	ARRDC3	-633808
611	chr14	67227760	67229500	1741	Promoter (<=1kb)	67227471	67228544	1074	161142	ENST00000554500.1	FAM71D	289
612	chr12	38416192	38418252	2061	Distal Intergenic	38316839	38321327	4489	144245	ENST00000548240.1	ALG10B	99353
613	chr1	202530197	202535454	5258	Intron (ENST00000391959.5/4660, intron 19 of 24)	202539840	202580577	40738	4660	ENST00000634903.1	PPP1R12B	-4386
614	chr17	8788471	8788937	467	Distal Intergenic	8797162	8799349	2188	162387	ENST00000329805.5	MFSD6L	10412
615	chr5	138722871	138723145	275	Intron (ENST00000517980.5/1495, intron 2 of 5)	138753097	138810204	57108	1495	ENST00000523912.5	CTNNA1	-29952
616	chr9	22168845	22171877	3033	Distal Intergenic	22118968	22120713	1746	100048912	ENST00000644233.1	CDKN2B-AS1	49877
617	chr14	65253405	65259686	6282	Exon (ENST00000553754.1/ENST00000553754.1, exon 3 of 3)	65212893	65222347	9455	100128233	ENST00000531609.1	LINC02324	-31058
618	chr2	174053356	174054107	752	Distal Intergenic	174075190	174079351	4162	29789	ENST00000497760.1	OLA1	25244
619	chr18	7161964	7162178	215	Distal Intergenic	6941744	7117814	176071	284217	ENST00000389658.3	LAMA1	-44150
620	chr3	24507080	24511040	3961	Intron (ENST00000629562.2/644990, intron 2 of 2)	24498625	24499618	994	644990	ENST00000594183.1	THRB-AS1	8455
621	chr14	23351811	23353489	1679	Promoter (<=1kb)	23346306	23352741	6436	51310	ENST00000354772.8	SLC22A17	0
622	chr4	86454074	86454347	274	Promoter (<=1kb)	86016086	86453436	437351	5602	ENST00000641170.1	MAPK10	-638
623	chr6	48112489	48112773	285	Distal Intergenic	47878028	48068689	190662	442213	ENST00000339488.8	PTCHD4	-43800
624	chr11	86996993	87001648	4656	Exon (ENST00000499504.7/100506368, exon 3 of 3)	87037844	87323758	285915	65084	ENST00000340353.11	TMEM135	-36196
625	chr2	232385133	232385677	545	Promoter (1-2kb)	232385750	232387044	1295	347694	ENST00000461596.1	ECEL1P2	1367
626	chr17	13436129	13439780	3652	Distal Intergenic	13543529	13543646	118	100302287	ENST00000408771.1	MIR548H3	103866
627	chr3	134055647	134061568	5922	Promoter (<=1kb)	134055256	134057648	2393	100507210	ENST00000483245.1	LINC02000	0
628	chr8	107490164	107490378	215	Intron (ENST00000517746.5/284, intron 1 of 8)	107346983	107494995	148013	284	ENST00000520033.1	ANGPT1	4617
629	chrX	14527950	14528657	708	Promoter (<=1kb)	14529298	14731809	202512	2742	ENST00000443437.6	GLRA2	-641
630	chr7	74141900	74142114	215	Distal Intergenic	74115368	74121029	5662	3984	ENST00000476792.1	LIMK1	26532
631	chr17	1203574	1203895	322	Intron (ENST00000575934.5/29, intron 1 of 3)	1003527	1187322	183796	29	ENST00000544583.6	ABR	-16252
632	chrX	80512735	80513059	325	Distal Intergenic	80420466	80445311	24846	169966	ENST00000308293.5	TENT5D	92269
633	chr8	8424423	8424789	367	Exon (ENST00000519814.2/ENST00000519814.2, exon 1 of 3)	8317737	8386498	68762	157285	ENST00000615670.4	PRAG1	-37925
634	chr10	15879228	15880699	1472	Distal Intergenic	15778170	15860520	82351	80013	ENST00000277632.7	MINDY3	-18708
635	chr3	194840673	194841789	1117	Distal Intergenic	194768806	194779658	10853	100507391	ENST00000455796.1	LINC01968	71867
636	chr1	116395442	116395656	215	Intron (ENST00000295598.9/476, intron 13 of 22)	116399471	116410261	10791	476	ENST00000440951.1	ATP1A1	-3815
637	chr3	107962667	107963107	441	Distal Intergenic	107883248	107928907	45660	285205	ENST00000494231.1	LINC00636	79419
638	chr2	162474950	162476417	1468	Intron (ENST00000618399.4/90134, intron 5 of 14)	162501985	162528360	26376	90134	ENST00000477019.1	KCNH7	51943
639	chr13	29946307	29946816	510	Intron (ENST00000400540.5/440131, intron 4 of 5)	29937906	29942567	4662	440131	ENST00000481738.1	LINC00544	8401
640	chr14	59951730	59951944	215	Intron (ENST00000254271.8/341883, intron 8 of 32)	59920149	59930992	10844	341883	ENST00000570145.1	LRRC9	31581
641	chr3	148465806	148466208	403	Intron (ENST00000648979.1/ENST00000648979.1, intron 1 of 5)	148312147	148399956	87810	105374149	ENST00000481334.1	LINC02046	153659
642	chr8	57519160	57519538	379	Intron (ENST00000520370.1/ENST00000520370.1, intron 1 of 1)	57343807	57346843	3037	101929488	ENST00000521446.1	LOC101929488	175353
643	chr4	120256222	120256947	726	Intron (ENST00000504106.5/ENST00000504106.5, intron 3 of 5)	120055608	120067074	11467	4085	ENST00000296509.10	MAD2L1	-189148
644	chr5	121713267	121714117	851	Distal Intergenic	121851955	121852833	879	94033	ENST00000321339.2	FTMT	-137838
645	chr9	133243610	133243991	382	Distal Intergenic	133250732	133275214	24483	28	ENST00000647353.1	ABO	31223
646	chr21	22888292	22888506	215	Distal Intergenic	23079284	23079392	109	102466967	ENST00000619419.1	MIR6130	-190778
647	chr6	30824898	30830393	5496	Promoter (<=1kb)	30798654	30830659	32006	401247	ENST00000419357.5	LINC00243	266
648	chr12	65635052	65635617	566	Intron (ENST00000537250.5/100507065, intron 1 of 3)	65558134	65642142	84009	100507065	ENST00000546198.5	LOC100507065	6525
649	chr11	104337560	104338817	1258	Distal Intergenic	103907189	104164379	257191	80310	ENST00000302251.9	PDGFD	-173181
650	chr2	204972321	204974656	2336	Intron (ENST00000415947.1/117583, intron 3 of 3)	204965152	205620162	655011	117583	ENST00000622699.2	PARD3B	7169
651	chr12	60013835	60015557	1723	Distal Intergenic	59769059	59775035	5977	9194	ENST00000548444.1	SLC16A7	244776
652	chr10	4058034	4059620	1587	Intron (ENST00000455199.1/101927964, intron 1 of 3)	4051726	4089013	37288	101927964	ENST00000455199.1	LOC101927964	6308
653	chr17	72710436	72713207	2772	3' UTR	72647109	72725614	78506	201266	ENST00000579988.1	SLC39A11	12407
654	chr3	129797540	129797754	215	Intron (ENST00000393238.7/23023, intron 3 of 5)	129828019	129867100	39082	23023	ENST00000513411.5	TMCC1	69346
655	chr4	44057095	44057427	333	Distal Intergenic	44017062	44022063	5002	100506827	ENST00000512678.1	LINC02475	40033
656	chr6	48916888	48917384	497	Distal Intergenic	49430360	49463191	32832	4594	ENST00000274813.3	MMUT	545807
657	chr5	40439954	40448360	8407	Distal Intergenic	40679498	40693735	14238	5734	ENST00000302472.3	PTGER4	-231138
658	chrX	50404178	50405088	911	Exon (ENST00000611977.1/139189, exon 5 of 28)	50341707	50351716	10010	85417	ENST00000487204.1	CCNB3	62471
659	chr7	4631267	4633107	1841	Distal Intergenic	4682309	4771443	89135	221937	ENST00000328914.4	FOXK1	-49202
660	chr15	88303261	88303475	215	Distal Intergenic	88255906	88256768	863	4916	ENST00000559067.1	NTRK3	-46493
661	chr21	46033381	46034428	1048	Distal Intergenic	46002489	46004106	1618	1291	ENST00000486023.1	COL6A1	30892
662	chr4	37720212	37723122	2911	Distal Intergenic	37612901	37686376	73476	768211	ENST00000454158.6	RELL1	-33836
663	chr4	182190056	182190414	359	Exon (ENST00000505389.1/ENST00000505389.1, exon 2 of 2)	182169293	182169378	86	100302270	ENST00000408300.1	MIR1305	20763
664	chr3	194783293	194783992	700	Distal Intergenic	194768806	194779658	10853	100507391	ENST00000455796.1	LINC01968	14487
665	chr3	65713562	65715138	1577	Intron (ENST00000330909.12/9223, intron 1 of 24)	65354231	65622090	267860	9223	ENST00000621418.4	MAGI1	-91472
666	chr18	7482257	7482471	215	Distal Intergenic	7566782	8406668	839887	5797	ENST00000580170.5	PTPRM	-84311
667	chr4	72940395	72940779	385	Distal Intergenic	73058076	73069692	11617	285521	ENST00000507544.2	COX18	128913
668	chr18	49527802	49528829	1028	Distal Intergenic	49560699	49581849	21151	9388	ENST00000577628.5	LIPG	-31870
669	chr3	121980334	121980548	215	Distal Intergenic	121988346	122007301	18956	286676	ENST00000460554.2	ILDR1	26753
670	chr20	10622214	10623045	832	Exon (ENST00000334534.9/128710, exon 8 of 8)	10639870	10641276	1407	182	ENST00000617357.1	JAG1	18231
671	chr1	51429555	51429998	444	Intron (ENST00000371730.6/2060, intron 12 of 22)	51403429	51422104	18676	2060	ENST00000493793.1	EPS15	-7451
672	chr8	75323519	75324733	1215	Promoter (<=1kb)	75223898	75324316	100419	101805492	ENST00000523313.1	CASC9	0
673	chr19	48562822	48564110	1289	Intron (ENST00000201586.6/6820, intron 1 of 6)	48552075	48599425	47351	6820	ENST00000201586.6	SULT2B1	10747
674	chr20	37549699	37550293	595	Distal Intergenic	37517418	37527931	10514	10904	ENST00000414542.6	BLCAP	-21768
675	chr12	126029636	126030553	918	Intron (ENST00000642407.1/ENST00000642407.1, intron 5 of 9)	125958688	125983374	24687	400084	ENST00000545784.5	LINC00939	-46262
676	chr9	121944443	121944657	215	Intron (ENST00000321582.9/158135, intron 6 of 8)	121988910	122092766	103857	158135	ENST00000487468.5	TTLL11	148109
677	chr2	132478168	132480029	1862	Intron (ENST00000329321.3/2863, intron 1 of 1)	132417043	132418529	1487	2863	ENST00000622084.1	GPR39	61125
678	chr5	123809791	123810960	1170	Distal Intergenic	123588425	123615017	26593	1456	ENST00000515322.2	CSNK1G3	221366
679	chr13	44575552	44579091	3540	Promoter (<=1kb)	44575893	44580432	4540	641467	ENST00000616360.1	TSC22D1-AS1	0
680	chr12	103672873	103674777	1905	Exon (ENST00000388887.6/55576, exon 23 of 69)	103703235	103705695	2461	55576	ENST00000549474.1	STAB2	-28458
681	chr22	50005964	50007092	1129	Promoter (1-2kb)	49994513	50008692	14180	400935	ENST00000341280.5	IL17REL	1600
682	chr15	70568587	70571085	2499	Exon (ENST00000630447.1/101929151, exon 2 of 2)	70570958	70586606	15649	101929151	ENST00000630447.1	LINC02204	15521
683	chr2	152160988	152161202	215	Intron (ENST00000263904.4/10254, intron 1 of 13)	152143897	152150206	6310	10254	ENST00000465460.5	STAM2	-10782
684	chr7	18467718	18468468	751	Intron (ENST00000417496.6/9734, intron 3 of 12)	18495710	18591544	95835	9734	ENST00000413380.5	HDAC9	-27242
685	chr21	14546116	14546607	492	Promoter (<=1kb)	14485228	14546341	61114	64092	ENST00000400564.5	SAMSN1	0
686	chr4	56768461	56768857	397	Distal Intergenic	56809860	56811796	1937	6691	ENST00000509707.1	SPINK2	42939
687	chr11	13668590	13674244	5655	Promoter (<=1kb)	13668670	13732346	63677	84188	ENST00000354817.7	FAR1	0
688	chr12	58532759	58534040	1282	Distal Intergenic	58544124	58813060	268937	100506869	ENST00000546977.5	LOC100506869	-10084
689	chr3	10085568	10086972	1405	Promoter (<=1kb)	10081320	10085828	4509	115795	ENST00000450616.5	FANCD2OS	0
690	chr10	132739900	132741218	1319	Intron (ENST00000368594.7/3632, intron 9 of 15)	132765824	132782405	16582	3632	ENST00000445580.1	INPP5A	-24606
691	chr11	118415436	118416754	1319	Exon (ENST00000602598.1/ENST00000602598.1, exon 1 of 1)	118406127	118409610	3484	10632	ENST00000527186.1	ATP5MG	9309
692	chr6	57468796	57470238	1443	Intron (ENST00000615550.4/5558, intron 7 of 13)	57505169	57537625	32457	5558	ENST00000470638.3	PRIM2	-34931
693	chr3	173671089	173671303	215	Intron (ENST00000457714.5/22871, intron 3 of 6)	173584920	174278982	694063	22871	ENST00000415045.1	NLGN1	86169
694	chr2	164967337	164968677	1341	Intron (ENST00000638199.1/101929633, intron 6 of 7)	164896186	164955525	59340	151258	ENST00000303735.8	SLC38A11	-11812
695	chr1	145071377	145071591	215	Intron (ENST00000612199.4/647135, intron 2 of 9)	144892049	145093246	201198	647135	ENST00000619678.1	SRGAP2B	21655
696	chr17	34370959	34372083	1125	Distal Intergenic	34360328	34363231	2904	6346	ENST00000225842.3	CCL1	-7728
697	chr18	51340076	51340657	582	Distal Intergenic	51391998	51636073	244076	100287225	ENST00000635680.1	LINC01630	-51341
698	chr5	177677798	177678200	403	Distal Intergenic	177632075	177672209	40135	202181	ENST00000515045.1	LOC202181	-5589
699	chr17	5122381	5123657	1277	Promoter (<=1kb)	5105635	5123102	17468	7775	ENST00000250076.7	ZNF232	0
700	chr5	29588222	29588436	215	Distal Intergenic	29380296	29395981	15686	101929681	ENST00000506492.5	LINC02064	-192241
701	chr22	45278726	45281570	2845	Distal Intergenic	45284982	45295874	10893	7380	ENST00000216211.8	UPK3A	-3412
702	chr6	165632125	165632339	215	Intron (ENST00000366882.6/10846, intron 1 of 21)	165327287	165611496	284210	10846	ENST00000647989.1	PDE10A	-20629
703	chr1	93550882	93556055	5174	3' UTR	93543826	93549314	5489	54874	ENST00000603526.1	FNBP1L	7056
704	chr20	46970704	46971403	700	Intron (ENST00000327619.9/2139, intron 1 of 15)	46978235	46990070	11836	2139	ENST00000497428.1	EYA2	-6832
705	chr12	115394545	115395764	1220	Distal Intergenic	115959616	115963549	3934	23389	ENST00000649937.1	MED13L	567785
706	chr12	5383529	5383954	426	Exon (ENST00000537714.1/ENST00000537714.1, exon 2 of 2)	5432112	5521536	89425	4908	ENST00000535299.5	NTF3	-48158
707	chr1	192861262	192861476	215	Intron (ENST00000644134.1/ENST00000644134.1, intron 1 of 6)	192809143	192811032	1890	5997	ENST00000487236.1	RGS2	52119
708	chr10	61271076	61272280	1205	Distal Intergenic	61409447	61414500	5054	219623	ENST00000507507.1	TMEM26	142220
709	chr14	99064258	99064839	582	Distal Intergenic	99169287	99271228	101942	64919	ENST00000357195.7	BCL11B	206389
710	chr16	48126733	48128015	1283	Intron (ENST00000311303.7/94160, intron 9 of 28)	48111448	48115433	3986	94160	ENST00000533185.1	ABCC12	-11300
711	chr17	20422154	20423052	899	Promoter (1-2kb)	20424589	20431008	6420	347716	ENST00000413270.2	USP32P3	-1537
712	chr13	28605641	28607852	2212	Distal Intergenic	28659104	28678925	19822	51371	ENST00000380842.4	POMP	-51252
713	chr3	150061986	150063089	1104	Intron (ENST00000487840.5/105374313, intron 1 of 2)	149966161	150050788	84628	5217	ENST00000497148.5	PFN2	-11198
714	chr5	122610920	122612131	1212	Distal Intergenic	122699390	122705069	5680	101927379	ENST00000514657.1	LINC02201	92938
715	chr1	180500426	180500640	215	Promoter (2-3kb)	180269653	180502954	233302	100527964	ENST00000642319.1	LHX4-AS1	2314
716	chr9	5509129	5509671	543	Promoter (<=1kb)	5510570	5571254	60685	80380	ENST00000397747.4	PDCD1LG2	-899
717	chr15	67569275	67573565	4291	Intron (ENST00000178640.9/5607, intron 3 of 21)	67563300	67641489	78190	5607	ENST00000439036.5	MAP2K5	5975
718	chr4	117420176	117420446	271	Intron (ENST00000626258.2/103689918, intron 1 of 3)	117428396	117691188	262793	103689918	ENST00000422145.7	LINC01378	-7950
719	chr1	232568489	232569206	718	Distal Intergenic	232397965	232561558	163594	57568	ENST00000366630.5	SIPA1L2	-6931
720	chr15	71096331	71097438	1108	Promoter (<=1kb)	71096952	71783383	686432	79875	ENST00000355327.7	THSD4	0
721	chr19	43784522	43785798	1277	Distal Intergenic	43766533	43781261	14729	3783	ENST00000262888.8	KCNN4	-3261
722	chr19	5536696	5537308	613	Distal Intergenic	5561034	5562298	1265	257000	ENST00000590789.1	TINCR	24990
723	chr11	72048561	72049540	980	5' UTR	72019556	72042142	22587	4926	ENST00000543009.5	NUMA1	-6419
724	chr3	57006662	57009053	2392	3' UTR	56773767	56977375	203609	50650	ENST00000486829.1	ARHGEF3	-29287
725	chr3	124945230	124945444	215	Intron (ENST00000497378.1/56667, intron 1 of 4)	124927899	124953819	25921	56667	ENST00000497378.1	MUC13	8375
726	chr4	68370435	68370705	271	Distal Intergenic	68313321	68350089	36769	91746	ENST00000355665.7	YTHDC1	-20346
727	chrX	41930949	41932339	1391	Distal Intergenic	41519554	41923645	404092	8573	ENST00000378154.2	CASK	-7304
728	chr9	129276855	129278473	1619	Distal Intergenic	129282458	129285728	3271	101929331	ENST00000455981.1	LOC101929331	-3985
729	chr6	105552325	105554407	2083	Distal Intergenic	105277565	105403084	125520	5550	ENST00000369110.7	PREP	-149241
730	chr4	56795454	56795668	215	Distal Intergenic	56809860	56811796	1937	6691	ENST00000509707.1	SPINK2	16128
731	chr3	156005864	156007231	1368	Distal Intergenic	156037701	156453260	415560	7881	ENST00000478609.5	KCNAB1	-30470
732	chr15	66678342	66681559	3218	Intron (ENST00000558797.1/102723165, intron 3 of 4)	66702228	66782848	80621	4091	ENST00000288840.9	SMAD6	-20669
733	chr14	58772211	58772425	215	Intron (ENST00000648996.1/102723742, intron 4 of 13)	58828234	58894284	66051	102723742	ENST00000553762.1	LINC01500	-55809
734	chr15	72196896	72197836	941	Promoter (<=1kb)	72159807	72197785	37979	196996	ENST00000309731.11	GRAMD2A	0
735	chr1	207316103	207318933	2831	Promoter (2-3kb)	207321376	207360966	39591	1604	ENST00000367064.8	CD55	-2443
736	chr10	30788575	30788897	323	Distal Intergenic	30723251	30723740	490	105376480	ENST00000416310.1	LINC02644	65324
737	chr6	45961278	45961492	215	Intron (ENST00000644878.1/53405, intron 1 of 5)	45880907	45937601	56695	53405	ENST00000643162.1	CLIC5	-23677
738	chr3	177442798	177453927	11130	Promoter (<=1kb)	177441964	177752305	310342	100505566	ENST00000439009.1	LINC00578	834
739	chr16	89821511	89825058	3548	Exon (ENST00000565103.1/ENST00000565103.1, exon 2 of 2)	89818179	89850562	32384	84501	ENST00000564878.5	SPIRE2	3332
740	chr18	65607300	65609479	2180	Intron (ENST00000579862.1/ENST00000579862.1, intron 2 of 3)	65750252	65880939	130688	1005	ENST00000323011.7	CDH7	-140773
741	chr9	72308098	72312132	4035	Promoter (2-3kb)	72305517	72315464	9948	100507540	ENST00000451152.1	LINC01504	2581
742	chr5	65017119	65018112	994	Intron (ENST00000381070.7/10283, intron 13 of 13)	64884156	65018591	134436	10283	ENST00000545000.1	CWC27	132963
743	chr3	25441624	25443914	2291	Intron (ENST00000383772.8/5915, intron 1 of 7)	25428716	25596649	167934	5915	ENST00000480001.5	RARB	12908
744	chr2	121282334	121285743	3410	Promoter (<=1kb)	121216587	121285207	68621	29842	ENST00000263707.5	TFCP2L1	0
745	chr1	108016040	108017087	1048	Distal Intergenic	107571160	107965144	393985	10451	ENST00000370056.8	VAV3	-50896
746	chr16	11473375	11475008	1634	Intron (ENST00000598234.6/ENST00000598234.6, intron 20 of 65)	11465260	11473174	7915	101927131	ENST00000572950.1	LOC101927131	8115
747	chr19	54918298	54918512	215	Distal Intergenic	54906188	54912871	6684	9437	ENST00000357397.5	NCR1	12110
748	chr21	43311000	43313394	2395	Distal Intergenic	43322417	43332039	9623	100126693	ENST00000450205.1	LINC00322	18645
749	chr19	38339261	38339605	345	Promoter (2-3kb)	38337028	38337861	834	57828	ENST00000477793.2	CATSPERG	2233
750	chr6	56857993	56858603	611	Intron (ENST00000426453.1/101930010, intron 1 of 3)	56614464	56851951	237488	667	ENST00000520645.5	DST	-6042
751	chr14	100761674	100762300	627	Distal Intergenic	100779410	100829185	49776	55384	ENST00000556407.5	MEG3	-17110
752	chr14	83006552	83006766	215	Distal Intergenic	82642636	82687370	44735	101928599	ENST00000556970.1	LINC02301	363916
753	chr14	44203782	44204841	1060	Intron (ENST00000553827.1/ENST00000553827.1, intron 1 of 2)	44504342	44507279	2938	84075	ENST00000340446.4	FSCB	302438
754	chr2	212708964	212710019	1056	Intron (ENST00000415387.1/ENST00000415387.1, intron 4 of 4)	212795331	212796720	1390	102725079	ENST00000434559.1	LINC01878	-85312
755	chr18	60024818	60025687	870	Distal Intergenic	59900036	59902963	2928	5366	ENST00000590596.1	PMAIP1	124782
756	chr10	55548575	55548789	215	Intron (ENST00000613346.4/65217, intron 2 of 5)	55599303	55600041	739	100463289	ENST00000512524.3	MTRNR2L5	-50514
757	chr20	45136919	45137133	215	Distal Intergenic	45123425	45124465	1041	128488	ENST00000372785.3	WFDC12	-12454
758	chr21	42428236	42428504	269	Intron (ENST00000291535.11/53347, intron 7 of 13)	42403917	42447530	43614	53347	ENST00000473381.1	UBASH3A	24319
759	chr16	2385088	2386015	928	Intron (ENST00000469908.5/650655, intron 7 of 16)	2361144	2425685	64542	650655	ENST00000494925.1	ABCA17P	23944
760	chr4	106364971	106366509	1539	Promoter (<=1kb)	106358183	106367435	9253	100507096	ENST00000507153.2	GIMD1	926
761	chr5	84436250	84437735	1486	Intron (ENST00000509406.5/ENST00000509406.5, intron 4 of 4)	83940554	84384793	444240	10085	ENST00000296591.9	EDIL3	-51457
762	chr15	25609544	25609819	276	Distal Intergenic	25680994	25684035	3042	57194	ENST00000555450.1	ATP10A	74216
763	chr6	105594315	105594529	215	Distal Intergenic	105277565	105403084	125520	5550	ENST00000369110.7	PREP	-191231
764	chr8	48317299	48318191	893	Distal Intergenic	48551567	48698510	146944	101929268	ENST00000522575.1	LOC101929268	-233376
765	chr14	63016148	63017012	865	5' UTR	62707567	63045186	337620	27133	ENST00000420622.6	KCNH5	28174
766	chr8	52100864	52101411	548	Distal Intergenic	52125884	52133144	7261	9705	ENST00000522861.1	ST18	31733
767	chrX	52426339	52426610	272	Intron (ENST00000456973.2/ENST00000456973.2, intron 1 of 1)	52369030	52375680	6651	9502	ENST00000286049.2	XAGE2	57309
768	chr1	77321514	77323446	1933	Intron (ENST00000354567.6/26289, intron 5 of 13)	77340405	77417849	77445	26289	ENST00000465146.5	AK5	-16959
769	chr9	13705721	13705935	215	Distal Intergenic	13927971	13945610	17640	100113404	ENST00000381010.3	LINC00583	-222036
770	chr16	47864330	47864544	215	Intron (ENST00000569726.1/101927132, intron 2 of 5)	47858579	47908431	49853	101927132	ENST00000569726.1	LINC02133	5751
771	chr11	66100185	66100457	273	Promoter (<=1kb)	66100763	66216250	115488	55690	ENST00000527380.1	PACS1	-306
772	chr3	147888045	147888312	268	Distal Intergenic	148078159	148088029	9871	100507461	ENST00000490465.1	LINC02032	-189847
773	chr11	84671148	84671362	215	Intron (ENST00000398309.6/1740, intron 1 of 22)	83457919	84720915	1262997	1740	ENST00000648622.1	DLG2	49553
774	chr19	31214509	31214776	268	Distal Intergenic	31167516	31207663	40148	107985312	ENST00000589511.1	LINC01791	46993
775	chr4	57094937	57095619	683	Intron (ENST00000295666.6/3490, intron 1 of 4)	57109762	57205299	95538	255130	ENST00000499667.6	IGFBP7-AS1	-14143
776	chrX	128674467	128675624	1158	Distal Intergenic	128050962	128052398	1437	139741	ENST00000371124.4	ACTRT1	-622069
777	chr1	87590544	87590758	215	Distal Intergenic	87353524	87371655	18132	100505768	ENST00000452509.1	LINC01364	-218889
778	chr18	58257317	58258800	1484	Promoter (1-2kb)	58255440	58396705	141266	23327	ENST00000635997.1	NEDD4L	1877
779	chr10	130490204	130490418	215	Distal Intergenic	130179374	130180382	1009	10539	ENST00000496195.1	GLRX3	310830
780	chr17	12287844	12288495	652	Distal Intergenic	12124299	12143730	19432	6416	ENST00000536413.2	MAP2K4	163545
781	chr2	36603412	36604192	781	Intron (ENST00000357996.4/9637, intron 1 of 6)	36552258	36598191	45934	9637	ENST00000379245.8	FEZ2	-5221
782	chr7	19968905	19971487	2583	Promoter (<=1kb)	19918981	19968237	49257	101927668	ENST00000457921.5	LOC101927668	-668
783	chr15	24756492	24757307	816	Distal Intergenic	24823637	24967985	144349	6638	ENST00000400098.6	SNRPN	-66330
784	chr5	67431555	67432008	454	Intron (ENST00000503106.5/ENST00000503106.5, intron 1 of 3)	67619791	67797604	177814	101928858	ENST00000514368.1	LOC101928858	-187783
785	chr7	25675561	25676615	1055	Intron (ENST00000456777.5/ENST00000456777.5, intron 1 of 3)	25949919	25949986	68	406940	ENST00000362215.3	MIR148A	273371
786	chr12	29253755	29257227	3473	Intron (ENST00000551451.5/55711, intron 1 of 2)	29270449	29307835	37387	55711	ENST00000552137.1	FAR2	-13222
787	chr7	26072872	26073727	856	Distal Intergenic	26152240	26187125	34886	9603	ENST00000056233.3	NFE2L3	-78513
788	chr6	131459633	131460133	501	Distal Intergenic	131573144	131584332	11189	383	ENST00000368087.7	ARG1	-113011
789	chr3	140631309	140631523	215	Distal Intergenic	140678039	140701150	23112	287015	ENST00000286349.3	TRIM42	-46516
790	chr7	26948776	26949155	380	Intron (ENST00000432747.1/8935, intron 1 of 6)	26738840	26995239	256400	8935	ENST00000432747.1	SKAP2	46084
791	chr4	66489796	66490010	215	Distal Intergenic	66276824	66276928	105	100302177	ENST00000408636.1	MIR1269A	212972
792	chr17	44171730	44172010	281	Promoter (1-2kb)	44170724	44178995	8272	92591	ENST00000589618.1	ASB16	1006
793	chrX	20360314	20364621	4308	Distal Intergenic	20154590	20267519	112930	6197	ENST00000643402.1	RPS6KA3	-92795
794	chr6	24889696	24890027	332	Intron (ENST00000644685.1/9750, intron 1 of 22)	24839373	24877365	37993	9750	ENST00000540914.5	RIPOR2	-12331
795	chr2	201879845	201881796	1952	Exon (ENST00000410091.7/65061, exon 13 of 15)	201854790	201893383	38594	65061	ENST00000466337.1	CDK15	25055
796	chr4	145812408	145813426	1019	Intron (ENST00000508784.5/152485, intron 8 of 14)	145819838	145845992	26155	152485	ENST00000509940.1	ZNF827	32566
797	chr9	38234423	38234637	215	Distal Intergenic	38392664	38398661	5998	219	ENST00000377698.3	ALDH1B1	-158027
798	chr12	21653194	21653408	215	Promoter (1-2kb)	21643545	21654570	11026	3945	ENST00000470280.1	LDHB	1162
799	chr2	121505332	121505765	434	Promoter (<=1kb)	121460015	121505093	45079	23332	ENST00000418989.5	CLASP1	-239
800	chr3	166925361	166925575	215	Distal Intergenic	167240638	167282321	41684	79740	ENST00000464922.5	ZBBX	356746
801	chr7	69104784	69106341	1558	Distal Intergenic	69595958	69597448	1491	100507468	ENST00000436600.2	CT66	491107
802	chr7	29097386	29097942	557	Promoter (<=1kb)	29072383	29096455	24073	54504	ENST00000458405.5	CPVL	-931
803	chr18	51235613	51236926	1314	Distal Intergenic	51176821	51218304	41484	51320	ENST00000591040.1	MEX3C	-17309
804	chr4	165505487	165509394	3908	Distal Intergenic	165418226	165484438	66213	1363	ENST00000511992.1	CPE	87261
805	chr11	129455486	129459924	4439	Distal Intergenic	129375940	129452279	76340	8538	ENST00000281437.5	BARX2	79546
806	chr8	134550353	134552933	2581	Intron (ENST00000520356.5/57623, intron 11 of 13)	134478025	134565671	87647	57623	ENST00000518408.5	ZFAT	12738
807	chr18	39939242	39939652	411	Distal Intergenic	39841809	39896298	54490	105372079	ENST00000637369.1	LINC01902	97433
808	chr4	128652774	128654590	1817	Distal Intergenic	128809623	128875224	65602	79960	ENST00000226319.10	JADE1	-155033
809	chr15	41407005	41410501	3497	Promoter (<=1kb)	41408408	41452942	44535	23168	ENST00000558298.5	RTF1	0
810	chr12	6506579	6509182	2604	Promoter (1-2kb)	6510222	6510551	330	692148	ENST00000459255.1	SCARNA10	-1040
811	chr14	87090114	87090617	504	Distal Intergenic	86905778	86922755	16978	283585	ENST00000557527.1	LINC01148	184336
812	chr10	8795455	8795731	277	Distal Intergenic	8897989	8914596	16608	105755953	ENST00000447297.1	LINC02676	-102258
813	chr12	74509175	74509389	215	Distal Intergenic	74537827	74545430	7604	552889	ENST00000519948.3	ATXN7L3B	-28438
814	chr19	53587521	53589266	1746	Distal Intergenic	53599628	53603497	3870	284379	ENST00000600193.4	LOC284379	14231
815	chr4	69381279	69381679	401	Distal Intergenic	69280499	69295050	14552	54490	ENST00000511240.1	UGT2B28	100780
816	chr19	23117150	23117422	273	Promoter (<=1kb)	23116975	23147219	30245	100129543	ENST00000597761.6	ZNF730	175
817	chr21	43710407	43714291	3885	Distal Intergenic	43719094	43738861	19768	8566	ENST00000398081.5	PDXK	-4803
818	chr8	59497396	59502567	5172	Distal Intergenic	59119946	59121315	1370	100505501	ENST00000517898.1	LOC100505501	377450
819	chr11	95458575	95460046	1472	Distal Intergenic	95232571	95234104	1534	100129203	ENST00000543573.1	LOC100129203	226004
820	chr5	88824609	88827908	3300	Promoter (<=1kb)	88720825	88825848	105024	4208	ENST00000625585.2	MEF2C	0
821	chr2	152495336	152501064	5729	Intron (ENST00000288670.13/114793, intron 1 of 25)	152578621	152607653	29033	114793	ENST00000492942.1	FMNL2	-77557
822	chr4	54924471	54925809	1339	Distal Intergenic	55094850	55096720	1871	3791	ENST00000509309.1	KDR	170911
823	chr9	21558051	21560761	2711	Promoter (<=1kb)	21455642	21559669	104028	554202	ENST00000304425.3	MIR31HG	0
824	chr5	89703140	89703890	751	Distal Intergenic	89418807	89466398	47592	101929423	ENST00000508742.1	MEF2C-AS1	284333
825	chr1	175301041	175301255	215	Distal Intergenic	175391428	175406364	14937	7143	ENST00000422274.2	TNR	105109
826	chr3	78917313	78921236	3924	Intron (ENST00000618833.4/6091, intron 2 of 27)	78598811	79018544	419734	6091	ENST00000467549.5	ROBO1	97308
827	chr2	139461044	139461373	330	Distal Intergenic	138897151	138898098	948	647012	ENST00000438766.1	YY1P2	563893
828	chr10	545760	547773	2014	Intron (ENST00000280886.11/22982, intron 1 of 36)	274190	486558	212369	22982	ENST00000381496.7	DIP2C	-59202
829	chrX	42882203	42884239	2037	Distal Intergenic	42777368	42778247	880	80316	ENST00000378131.3	PPP1R2C	-103956
830	chr18	63882070	63883974	1905	Intron (ENST00000404622.5/5055, intron 1 of 4)	63887700	63903890	16191	5055	ENST00000299502.8	SERPINB2	-3726
831	chr7	33699034	33699248	215	Distal Intergenic	33533687	33605207	71521	27241	ENST00000498189.1	BBS9	165347
832	chr12	51117243	51117457	215	Intron (ENST00000257915.9/7024, intron 3 of 14)	51095158	51103931	8774	7024	ENST00000546822.1	TFCP2	-13312
833	chr9	7337011	7337386	376	Distal Intergenic	7127907	7169884	41978	23081	ENST00000466673.1	KDM4C	209104
834	chr2	196232690	196233054	365	Intron (ENST00000260983.8/57520, intron 21 of 28)	196238494	196242826	4333	57520	ENST00000498146.2	HECW2	9772
835	chr4	110904274	110904945	672	Distal Intergenic	110860582	110860647	66	100126354	ENST00000401142.1	MIR297	-43627
836	chr12	58804139	58804406	268	Intron (ENST00000546977.5/100506869, intron 6 of 7)	58800661	58812659	11999	100506869	ENST00000552519.2	LOC100506869	3478
837	chr6	92363319	92363533	215	Distal Intergenic	91629915	91690428	60514	101929083	ENST00000437768.1	CASC6	-672891
838	chr13	79775566	79775780	215	Distal Intergenic	79804418	79805685	1268	102724076	ENST00000457858.1	LINC01038	-28638
839	chr12	10384648	10386485	1838	Promoter (2-3kb)	10372416	10382182	9767	22914	ENST00000540267.5	KLRK1	-2466
840	chr9	76455592	76456276	685	Promoter (2-3kb)	76459152	76507414	48263	2650	ENST00000444201.6	GCNT1	-2876
841	chrX	277853	280581	2729	Promoter (<=1kb)	281055	288869	7815	55344	ENST00000445062.6	PLCXD1	-474
842	chr12	48947289	48948750	1462	Intron (ENST00000398092.4/377, intron 1 of 4)	48921963	48939663	17701	51303	ENST00000537495.2	FKBP11	-7626
843	chr2	229443173	229447404	4232	Exon (ENST00000341772.4/92737, exon 8 of 13)	229580154	229587177	7024	92737	ENST00000482831.1	DNER	139773
844	chr2	166608379	166609198	820	Distal Intergenic	166440583	166494326	53744	6332	ENST00000419992.6	SCN7A	-114053
845	chr11	86691249	86700754	9506	Distal Intergenic	86449965	86672636	222672	10873	ENST00000526504.5	ME3	-18613
846	chr5	136984237	136985499	1263	Exon (ENST00000394945.5/6695, exon 9 of 11)	136978792	136988837	10046	6695	ENST00000509978.1	SPOCK1	3338
847	chr9	76490599	76491132	534	Intron (ENST00000488136.5/2650, intron 1 of 3)	76459283	76651203	191921	2650	ENST00000648797.1	GCNT1	31316
848	chr12	132437413	132437806	394	Distal Intergenic	132489551	132585188	95638	57666	ENST00000434748.2	FBRSL1	-51745
849	chr1	32031131	32033303	2173	Exon (ENST00000327300.11/10657, exon 3 of 9)	32014182	32060850	46669	10657	ENST00000484270.2	KHDRBS1	16949
850	chr11	13691996	13692837	842	Promoter (1-2kb)	13694756	13700567	5812	84188	ENST00000532769.1	FAR1	-1919
851	chrX	118771788	118775507	3720	Exon (ENST00000371666.7/3597, exon 9 of 11)	118749703	118766897	17195	3597	ENST00000481868.1	IL13RA1	22085
852	chr1	95645456	95645670	215	Intron (ENST00000456933.1/100996635, intron 2 of 3)	95510340	95515464	5125	100996635	ENST00000411798.1	LINC02607	135116
853	chr6	109789959	109791160	1202	Intron (ENST00000230124.7/9896, intron 19 of 22)	109786006	109791571	5566	9896	ENST00000419951.1	FIG4	3953
854	chr2	180763279	180763956	678	Intron (ENST00000629145.1/101669767, intron 2 of 4)	180692104	180916939	224836	101669767	ENST00000629145.1	SCHLAP1	71175
855	chr3	23035551	23036875	1325	Distal Intergenic	23195070	23202533	7464	100505877	ENST00000452251.5	UBE2E2-AS1	165658
856	chr3	126910791	126912412	1622	Intron (ENST00000290913.7/84303, intron 5 of 7)	126935124	126960398	25275	84303	ENST00000504973.5	CHCHD6	-22712
857	chr5	40600893	40601107	215	Intron (ENST00000636863.1/23548, intron 3 of 3)	40679498	40693735	14238	5734	ENST00000302472.3	PTGER4	-78391
858	chr6	160809371	160811464	2094	Distal Intergenic	160739168	160753315	14148	5340	ENST00000461414.2	PLG	70203
859	chrX	110043331	110047549	4219	Intron (ENST00000372072.7/84187, intron 1 of 5)	110055329	110055426	98	724022	ENST00000385278.3	MIR652	-7780
860	chr5	52985301	52991085	5785	Promoter (<=1kb)	52989326	53094779	105454	3673	ENST00000296585.9	ITGA2	0
861	chr12	38542854	38543297	444	Distal Intergenic	38653962	38670995	17034	144402	ENST00000547417.1	CPNE8	127698
862	chr20	52016459	52018326	1868	Distal Intergenic	52084969	52098466	13498	55734	ENST00000456175.5	ZFP64	80140
863	chr5	149061514	149063817	2304	Promoter (<=1kb)	149063317	149071527	8211	255187	ENST00000515519.5	SH3TC2-DT	0
864	chr8	85938472	85940610	2139	Intron (ENST00000518266.1/ENST00000518266.1, intron 1 of 1)	85826953	85828467	1515	100288527	ENST00000603433.2	REXO1L2P	-110005
865	chr13	76917370	76918551	1182	Distal Intergenic	76948497	76958642	10146	730249	ENST00000377462.5	ACOD1	-29946
866	chr10	109430281	109430871	591	Distal Intergenic	109868636	109871032	2397	7511	ENST00000494499.1	XPNPEP1	440161
867	chr6	133340736	133342511	1776	Intron (ENST00000452339.6/2070, intron 3 of 18)	133325211	133468569	143359	2070	ENST00000421413.6	EYA4	15525
868	chr4	188960242	188960456	215	Distal Intergenic	188776657	188785511	8855	105377610	ENST00000504165.1	LINC02508	183585
869	chr6	155247821	155248712	892	Exon (ENST00000461783.7/26230, exon 22 of 29)	155252919	155256686	3768	26230	ENST00000537845.1	TIAM2	-4207
870	chr8	31095971	31097441	1471	Exon (ENST00000298139.5/7486, exon 17 of 35)	31087644	31173763	86120	7486	ENST00000521620.5	WRN	8327
871	chr3	138114086	138116203	2118	Promoter (<=1kb)	138061990	138115609	53620	199221	ENST00000327532.6	DZIP1L	0
872	chr10	71994978	71995192	215	Intron (ENST00000373115.4/9469, intron 1 of 2)	71964365	72013564	49200	9469	ENST00000373115.4	CHST3	30613
873	chr1	21968325	21977573	9249	Promoter (<=1kb)	21977021	21989344	12324	23436	ENST00000337107.10	CELA3B	0
874	chr11	7977906	7978120	215	Intron (ENST00000533626.5/8665, intron 1 of 9)	7970251	8001862	31612	8665	ENST00000533626.5	EIF3F	7655
875	chr13	114115093	114116257	1165	Intron (ENST00000334062.7/22821, intron 1 of 23)	113977783	114132611	154829	22821	ENST00000334062.7	RASA3	16354
876	chr1	179814633	179815553	921	3' UTR	179873706	179877772	4067	163590	ENST00000483123.1	TOR1AIP2	62219
877	chr10	76113249	76113709	461	Intron (ENST00000611255.4/83938, intron 5 of 6)	76036006	76058789	22784	83938	ENST00000611306.1	LRMDA	77243
878	chr5	33806202	33808372	2171	Intron (ENST00000504830.5/81792, intron 2 of 23)	33576963	33840312	263350	81792	ENST00000504582.5	ADAMTS12	31940
879	chr4	86853403	86862205	8803	Distal Intergenic	86823468	86849263	25796	345274	ENST00000273905.6	SLC10A6	-4140
880	chr7	111748426	111751143	2718	Intron (ENST00000423057.6/9732, intron 26 of 35)	111726747	111740214	13468	9732	ENST00000486186.5	DOCK4	-8212
881	chr7	123947506	123948105	600	Promoter (<=1kb)	123947700	123960039	12340	6677	ENST00000223028.11	SPAM1	0
882	chr13	100817440	100818557	1118	Intron (ENST00000457843.1/100885778, intron 2 of 7)	100708325	101059286	350962	100885778	ENST00000457843.1	NALCN-AS1	109115
883	chrX	153226058	153226437	380	Intron (ENST00000620118.4/ENST00000620118.4, intron 2 of 3)	153179285	153183880	4596	4100	ENST00000356661.6	MAGEA1	46773
884	chr1	55239989	55240262	274	Intron (ENST00000643232.1/109729135, intron 1 of 1)	55225641	55225723	83	100616272	ENST00000581938.1	MIR4422	14348
885	chr11	101429568	101429782	215	Distal Intergenic	101453641	101455577	1937	7225	ENST00000532184.1	TRPC6	25795
886	chr22	18933605	18933819	215	Promoter (1-2kb)	18922372	18934828	12457	5625	ENST00000450579.1	PRODH	1009
887	chr2	191569114	191579062	9949	Distal Intergenic	191678068	191682487	4420	64859	ENST00000491331.5	NABP1	-99006
888	chr1	172431330	172433370	2041	Intron (ENST00000367727.8/92346, intron 1 of 6)	172442331	172443946	1616	5279	ENST00000478184.1	PIGC	10576
889	chr1	42370286	42371120	835	Distal Intergenic	42380795	42410165	29371	284716	ENST00000410070.6	RIMKLA	-9675
890	chr20	41479920	41480705	786	Intron (ENST00000373233.7/84181, intron 16 of 36)	41473023	41484507	11485	84181	ENST00000476641.2	CHD6	3802
891	chr18	60892651	60892865	215	Intron (ENST00000591869.1/ENST00000591869.1, intron 1 of 7)	61333582	61555773	222192	28316	ENST00000262717.8	CDH20	-440717
892	chrX	48855068	48855565	498	Distal Intergenic	48831094	48835633	4540	27344	ENST00000218230.5	PCSK1N	-19435
893	chr19	49127478	49129362	1885	Promoter (<=1kb)	49127874	49151026	23153	8541	ENST00000602351.5	PPFIA3	0
894	chr7	73190888	73191662	775	Exon (ENST00000544802.5/2970, exon 10 of 24)	73175415	73205441	30027	2970	ENST00000453092.3	GTF2IP1	15473
895	chrX	134022488	134024559	2072	Distal Intergenic	133535745	133985895	450151	2719	ENST00000370818.7	GPC3	-36593
896	chr11	77909267	77909481	215	Promoter (1-2kb)	77878722	77911154	32433	92105	ENST00000535943.1	INTS4	1673
897	chr1	85061625	85062241	617	Promoter (<=1kb)	85062312	85133138	70827	126820	ENST00000326813.12	WDR63	-71
898	chr1	176064984	176066045	1062	Intron (ENST00000461830.6/64326, intron 1 of 8)	175944831	176081256	136426	64326	ENST00000461830.6	COP1	15211
899	chr3	159733800	159734068	269	Intron (ENST00000639147.1/100505385, intron 3 of 3)	159763713	159764963	1251	100505385	ENST00000640565.1	IQCJ-SCHIP1	-29645
900	chr17	57662139	57663096	958	Intron (ENST00000416426.6/124540, intron 11 of 13)	57671474	57675056	3583	124540	ENST00000579466.1	MSI2	-8378
901	chr6	116397609	116399174	1566	Promoter (<=1kb)	116399395	116463696	64302	29940	ENST00000644499.1	DSE	-221
902	chr4	124206397	124208086	1690	Intron (ENST00000507299.1/ENST00000507299.1, intron 3 of 4)	124499942	124558434	58493	101927087	ENST00000563724.1	LINC02516	350348
903	chr10	52373694	52373908	215	Distal Intergenic	52315252	52316901	1650	22943	ENST00000476752.1	DKK1	58442
904	chr11	46979555	46979769	215	Intron (ENST00000533124.5/79096, intron 1 of 2)	46936780	47161816	225037	79096	ENST00000527784.5	C11orf49	42775
905	chr3	8740986	8742074	1089	Promoter (2-3kb)	8619601	8745036	125436	51066	ENST00000435138.5	SSUH2	2962
906	chr2	120559715	120560082	368	Distal Intergenic	120464335	120466218	1884	84931	ENST00000622953.1	LINC01101	-93497
907	chr2	74202825	74208946	6122	Promoter (<=1kb)	74206394	74210051	3658	10797	ENST00000462026.1	MTHFD2	0
908	chr20	5744288	5753424	9137	Promoter (<=1kb)	5750393	5773447	23055	149840	ENST00000378979.8	SHLD1	0
909	chr7	142922287	142924124	1838	Intron (ENST00000265310.5/56302, intron 8 of 14)	142908514	142933441	24928	56302	ENST00000439304.5	TRPV5	9317
910	chr3	141618847	141619233	387	Distal Intergenic	141586699	141609523	22825	5922	ENST00000506365.1	RASA2	32148
911	chr4	89836843	89838275	1433	Promoter (<=1kb)	89724099	89836976	112878	6622	ENST00000420646.6	SNCA	0
912	chrX	68912542	68912919	378	Distal Intergenic	68828997	68842147	13151	1947	ENST00000204961.4	EFNB1	83545
913	chr13	23433221	23433770	550	Promoter (<=1kb)	23328826	23433728	104903	26278	ENST00000382292.8	SACS	0
914	chr6	4484639	4492761	8123	Promoter (<=1kb)	4491807	4495769	3963	105374895	ENST00000563079.1	LINC02533	0
915	chr16	30538765	30545190	6426	Intron (ENST00000568114.1/92595, intron 1 of 1)	30530367	30535347	4981	65988	ENST00000252799.3	ZNF747	-3418
916	chr6	15615898	15616597	700	Intron (ENST00000344537.9/84062, intron 5 of 9)	15522807	15586015	63209	84062	ENST00000462989.6	DTNBP1	-29883
917	chr6	1640790	1642061	1272	Intron (ENST00000530927.5/2762, intron 9 of 10)	1623806	1626188	2383	2762	ENST00000486793.5	GMDS	-14602
918	chr3	99647144	99649369	2226	Intron (ENST00000463753.5/1295, intron 1 of 2)	99638622	99794508	155887	1295	ENST00000621757.1	COL8A1	8522
919	chr9	100374510	100378364	3855	Distal Intergenic	100302084	100352939	50856	54881	ENST00000374902.8	TEX10	-21571
920	chr12	124188103	124189501	1399	Intron (ENST00000389727.8/100533183, intron 3 of 4)	124289164	124316022	26859	144347	ENST00000324038.6	RFLNA	-99663
921	chr14	36995957	36997405	1449	Intron (ENST00000555449.5/89874, intron 1 of 10)	36952309	36952391	83	100616280	ENST00000582187.1	MIR4503	-43566
922	chr4	133646644	133647056	413	Distal Intergenic	133154893	133208606	53714	57575	ENST00000511112.2	PCDH10	491751
923	chr2	69161427	69165512	4086	Intron (ENST00000303714.8/84168, intron 13 of 17)	69103682	69103755	74	100423030	ENST00000577443.1	MIR3126	57745
924	chr2	219702918	219704104	1187	Intron (ENST00000606673.1/ENST00000606673.1, intron 1 of 1)	219633346	219635781	2436	6508	ENST00000444906.1	SLC4A3	69572
925	chr20	35874655	35876817	2163	Intron (ENST00000374012.7/51230, intron 9 of 17)	35869530	35871893	2364	51230	ENST00000485604.1	PHF20	5125
926	chr13	23069884	23070155	272	Distal Intergenic	23180952	23325165	144214	6445	ENST00000218867.3	SGCG	-110797
927	chr2	108287083	108290310	3228	Promoter (<=1kb)	108288639	108309915	21277	6819	ENST00000251481.10	SULT1C2	0
928	chr7	26154829	26160766	5938	Promoter (2-3kb)	26152240	26187125	34886	9603	ENST00000056233.3	NFE2L3	2589
929	chr4	148954429	148954643	215	Distal Intergenic	148940941	148942378	1438	105377480	ENST00000504394.1	LOC105377480	-12051
930	chr3	112307516	112309481	1966	Promoter (<=1kb)	112307121	112330324	23204	105374042	ENST00000607456.1	LOC105374042	395
931	chr4	147155811	147156025	215	Distal Intergenic	147344629	147344717	89	100313938	ENST00000408442.1	MIR548G	188692
932	chr6	45984885	45985099	215	Intron (ENST00000644878.1/53405, intron 1 of 5)	46014283	46015546	1264	53405	ENST00000464137.1	CLIC5	30447
933	chr13	66504166	66504500	335	Intron (ENST00000377865.6/5101, intron 4 of 4)	66304604	66306309	1706	5101	ENST00000617020.1	PCDH9	-197857
934	chr11	120057905	120058119	215	Distal Intergenic	120112410	120117106	4697	23650	ENST00000526161.5	TRIM29	58987
935	chr10	14658004	14658730	727	Intron (ENST00000647862.1/ENST00000647862.1, intron 4 of 4)	14521876	14612552	90677	83641	ENST00000442012.5	FAM107B	-45452
936	chr11	104032605	104034291	1687	Promoter (2-3kb)	104036580	104039188	2609	414301	ENST00000302259.4	DDI1	-2289
937	chr17	57846297	57846568	272	Intron (ENST00000313608.12/51649, intron 2 of 4)	57848736	57849997	1262	51649	ENST00000579768.1	MRPS23	3429
938	chr6	113121279	113121855	577	Distal Intergenic	113428551	113432641	4091	105377957	ENST00000430728.1	LINC02518	310786
939	chr10	103922411	103922708	298	Distal Intergenic	103882542	103918205	35664	79991	ENST00000224950.7	STN1	-4206
940	chr11	47918468	47918682	215	Distal Intergenic	47980558	48170841	190284	5795	ENST00000613246.4	PTPRJ	-61876
941	chr15	32796753	32797722	970	Intron (ENST00000616417.4/342184, intron 19 of 20)	32774323	32860837	86515	342184	ENST00000558882.1	FMN1	63115
942	chr4	153398205	153399582	1378	Intron (ENST00000622785.4/84057, intron 5 of 6)	153350064	153409145	59082	84057	ENST00000504860.2	MND1	48141
943	chr12	101012229	101013058	830	Intron (ENST00000549155.6/121601, intron 10 of 10)	100987119	101042381	55263	121601	ENST00000549234.1	ANO4	25110
944	chr2	181069767	181070871	1105	Intron (ENST00000602762.5/10477, intron 2 of 3)	181057691	181076478	18788	10477	ENST00000602837.1	UBE2E3	12076
945	chr7	102273582	102273902	321	Promoter (<=1kb)	102274174	102283932	9759	1523	ENST00000487284.2	CUX1	-272
946	chr9	113301978	113305610	3633	Promoter (<=1kb)	113297454	113303271	5818	138065	ENST00000297894.5	RNF183	0
947	chr14	75864830	75865203	374	Intron (ENST00000557636.5/23093, intron 30 of 31)	75882719	75902504	19786	23093	ENST00000557219.1	TTLL5	-17516
948	chr1	64062755	64063122	368	Intron (ENST00000371080.5/4919, intron 4 of 6)	64094442	64112205	17764	101927034	ENST00000412349.6	ROR1-AS1	49083
949	chr11	75332254	75332537	284	Promoter (2-3kb)	75335092	75335186	95	442900	ENST00000362220.1	MIR326	2649
950	chr16	72474819	72475308	490	Intron (ENST00000624327.1/ENST00000624327.1, intron 1 of 1)	72479751	72627686	147936	101927957	ENST00000563770.5	LINC01572	152378
951	chr10	19054850	19055246	397	Intron (ENST00000454679.6/340895, intron 1 of 39)	19048771	19734478	685708	340895	ENST00000454679.6	MALRD1	6079
952	chr1	30788912	30789255	344	Distal Intergenic	30732469	30757820	25352	7805	ENST00000294507.3	LAPTM5	-31092
953	chr21	15271810	15272024	215	Distal Intergenic	14988141	15065936	77796	8204	ENST00000637630.1	NRIP1	-205874
954	chr7	34756352	34756812	461	Promoter (1-2kb)	34346512	34758234	411723	404744	ENST00000419766.5	NPSR1-AS1	1422
955	chr7	124051430	124051644	215	Intron (ENST00000484322.5/ENST00000484322.5, intron 2 of 8)	124030916	124033023	2108	730130	ENST00000455783.2	TMEM229A	-18407
956	chr11	19088093	19088307	215	Distal Intergenic	19054455	19060681	6227	117194	ENST00000329773.2	MRGPRX2	-27412
957	chr9	106632154	106633169	1016	Intron (ENST00000637185.1/100996590, intron 3 of 7)	106616058	106679798	63741	100996590	ENST00000444985.6	LINC01505	16096
958	chr7	133609788	133610809	1022	Intron (ENST00000486013.5/60412, intron 9 of 9)	133601838	133917717	315880	60412	ENST00000460346.5	EXOC4	7950
959	chr8	22993780	22996285	2506	Promoter (<=1kb)	22995841	23020192	24352	23221	ENST00000522948.5	RHOBTB2	0
960	chr1	168439512	168443316	3805	Intron (ENST00000636459.1/100505918, intron 5 of 8)	168400829	168422656	21828	100505918	ENST00000441851.1	LOC100505918	-16856
961	chr10	70266608	70268391	1784	Intron (ENST00000277942.6/64106, intron 1 of 3)	70247329	70283676	36348	64106	ENST00000277942.6	NPFFR1	15285
962	chr12	87428758	87428972	215	Distal Intergenic	87782163	87783456	1294	400058	ENST00000599191.1	MKRN9P	354484
963	chr9	108548564	108550041	1478	Distal Intergenic	108854589	108856967	2379	10880	ENST00000374667.4	ACTL7B	306926
964	chr8	101087305	101087869	565	Distal Intergenic	101052054	101076251	24198	441374	ENST00000514926.1	FLJ42969	35251
965	chr11	123158243	123159963	1721	Intron (ENST00000448775.3/79827, intron 1 of 6)	123069865	123195281	125417	79827	ENST00000448775.3	CLMP	35318
966	chr5	16734490	16738614	4125	Promoter (<=1kb)	16666380	16738414	72035	4651	ENST00000515803.5	MYO10	0
967	chr20	5513221	5515536	2316	Distal Intergenic	5507875	5510002	2128	101929207	ENST00000450640.1	LINC01729	-3219
968	chr7	51680610	51681732	1123	Intron (ENST00000648455.1/ENST00000648455.1, intron 3 of 6)	51064399	51316818	252420	23242	ENST00000395540.6	COBL	-363792
969	chr6	134378758	134380129	1372	Distal Intergenic	134437716	134504581	66866	154092	ENST00000431422.1	LINC01010	-57587
970	chr3	1318040	1319441	1402	Intron (ENST00000446702.6/27255, intron 7 of 22)	1401285	1402801	1517	27255	ENST00000485257.1	CNTN6	-81844
971	chr3	97235672	97235886	215	Intron (ENST00000470610.6/285220, intron 4 of 4)	97439610	97610824	171215	285220	ENST00000503760.5	EPHA6	-203724
972	chr11	24855628	24856055	428	Intron (ENST00000531187.5/338645, intron 5 of 5)	24729140	25082631	353492	338645	ENST00000620308.1	LUZP2	126488
973	chr4	126213768	126214792	1025	Distal Intergenic	125507259	125507307	49	100302267	ENST00000636770.1	MIR2054	706509
974	chr2	185392518	185393224	707	Distal Intergenic	185719874	185738721	18848	101927196	ENST00000421998.5	FSIP2-AS2	345497
975	chr21	35367466	35368206	741	Intron (ENST00000475045.6/101928269, intron 9 of 12)	35435661	35465329	29669	100506403	ENST00000494829.1	LOC100506403	97123
976	chr4	100936445	100936887	443	Distal Intergenic	100479972	100880126	400155	51705	ENST00000510657.1	EMCN	-56319
977	chr4	74892840	74893969	1130	Distal Intergenic	74933095	75050115	117021	25849	ENST00000513238.5	PARM1	-39126
978	chr4	172815311	172816349	1039	Intron (ENST00000506823.5/442117, intron 7 of 12)	172809360	173040100	230741	442117	ENST00000616459.1	GALNTL6	5951
979	chr10	58306140	58306354	215	Distal Intergenic	58334975	58370753	35779	7321	ENST00000373910.8	UBE2D1	-28621
980	chr17	42441145	42442388	1244	Distal Intergenic	42458844	42521485	62642	535	ENST00000393829.6	ATP6V0A1	-16456
981	chr17	57846812	57847500	689	Promoter (2-3kb)	57848736	57849997	1262	51649	ENST00000579768.1	MRPS23	2497
982	chr16	55964932	55966045	1114	Distal Intergenic	55846154	55956031	109878	221223	ENST00000521992.5	CES5A	-8901
983	chr1	94094388	94094732	345	Intron (ENST00000370225.3/24, intron 6 of 49)	94045637	94121125	75489	24	ENST00000649773.1	ABCA4	26393
984	chr2	230731098	230731383	286	Intron (ENST00000258418.9/51719, intron 1 of 8)	230713548	230818750	105203	51719	ENST00000409788.7	CAB39	17550
985	chr19	34016704	34020255	3552	Distal Intergenic	34172504	34196666	24163	26065	ENST00000589878.5	LSM14A	-152249
986	chr4	62457809	62458266	458	Distal Intergenic	62072847	62165554	92708	101927186	ENST00000509461.5	ADGRL3-AS1	-292255
987	chr1	241837603	241838620	1018	Distal Intergenic	241847967	241850460	2494	9156	ENST00000519225.5	EXO1	-9347
988	chrX	43333456	43333670	215	Intron (ENST00000649774.1/ENST00000649774.1, intron 3 of 7)	43176994	43226598	49605	101927501	ENST00000440955.1	PINCR	156462
989	chr19	12155673	12157501	1829	Promoter (<=1kb)	12132117	12156731	24615	100529855	ENST00000430024.5	ZNF625-ZNF20	0
990	chr11	129375129	129378792	3664	Promoter (<=1kb)	129375940	129452279	76340	8538	ENST00000281437.5	BARX2	0
991	chr3	64178148	64179208	1061	Intron (ENST00000638394.1/166336, intron 2 of 7)	64187544	64200965	13422	100874243	ENST00000473434.1	PRICKLE2-AS3	-8336
992	chr8	101059890	101060605	716	Intron (ENST00000514926.1/441374, intron 2 of 2)	101052054	101076251	24198	441374	ENST00000514926.1	FLJ42969	7836
993	chr2	117609164	117609852	689	Distal Intergenic	117814650	117832379	17730	8886	ENST00000263239.6	DDX18	-204798
994	chr14	19062477	19063252	776	Promoter (<=1kb)	19062406	19093914	31509	503638	ENST00000619210.1	DUXAP9	71
995	chrX	153818726	153819632	907	Intron (ENST00000164640.8/57595, intron 1 of 7)	153807327	153829670	22344	57595	ENST00000468491.1	PDZD4	10038
996	chr1	183105108	183107567	2460	Intron (ENST00000258341.4/3915, intron 2 of 27)	183110581	183116986	6406	3915	ENST00000479499.1	LAMC1	-3014
997	chr8	124408234	124410224	1991	Distal Intergenic	124306189	124372692	66504	157378	ENST00000297632.7	TMEM65	-35542
998	chr8	37141743	37149179	7437	Distal Intergenic	36928905	36931145	2241	157855	ENST00000518904.1	KCNU1	212838
999	chr19	772926	773948	1023	Distal Intergenic	758063	760505	2443	126353	ENST00000614180.1	MISP	14863
1000	chr12	105479700	105480139	440	Distal Intergenic	105353509	105371203	17695	387882	ENST00000548336.1	C12orf75	126191
1001	chr3	56781188	56785915	4728	Intron (ENST00000296315.7/50650, intron 1 of 9)	56727421	56775657	48237	50650	ENST00000413728.6	ARHGEF3	-5531
1002	chr2	64061792	64065288	3497	Distal Intergenic	63893056	64019072	126017	51542	ENST00000272322.8	VPS54	-42720
1003	chr15	36416115	36416387	273	Distal Intergenic	36579611	36810223	230613	84529	ENST00000566621.5	C15orf41	-163224
1004	chr19	52903325	52904376	1052	Intron (ENST00000634278.1/162967, intron 1 of 7)	52863866	52897693	33828	162967	ENST00000597909.5	ZNF320	-5632
1005	chr14	36994287	36994634	348	Intron (ENST00000555449.5/89874, intron 1 of 10)	36952309	36952391	83	100616280	ENST00000582187.1	MIR4503	-41896
1006	chr2	215877096	215880350	3255	Distal Intergenic	215743820	215843722	99903	646324	ENST00000417922.1	LINC00607	-33374
1007	chr21	40660970	40661184	215	Intron (ENST00000400454.5/1826, intron 3 of 32)	40618507	40630767	12261	100874326	ENST00000440363.1	DSCAM-IT1	-30203
1008	chr1	84960757	84961081	325	Intron (ENST00000370608.7/255231, intron 2 of 13)	84926426	84929844	3419	255231	ENST00000530971.1	MCOLN2	-30913
1009	chr13	95121663	95122247	585	Intron (ENST00000645237.1/10257, intron 19 of 30)	95073270	95148960	75691	10257	ENST00000644880.1	ABCC4	26713
1010	chr7	64888919	64889506	588	Exon (ENST00000476730.1/ENST00000476730.1, exon 3 of 3)	64882493	64929124	46632	10793	ENST00000527278.5	ZNF273	6426
1011	chr12	58433558	58434557	1000	Distal Intergenic	58544124	58813060	268937	100506869	ENST00000546977.5	LOC100506869	-109567
1012	chr2	169965123	169965337	215	Intron (ENST00000272793.9/130507, intron 24 of 38)	169949482	169958521	9040	130507	ENST00000487689.1	UBR3	15641
1013	chr6	105522300	105523474	1175	Distal Intergenic	105277565	105403084	125520	5550	ENST00000369110.7	PREP	-119216
1014	chr3	117892264	117892478	215	Intron (ENST00000484092.1/ENST00000484092.1, intron 1 of 1)	117688579	117690932	2354	105374057	ENST00000496994.1	LINC02024	-201332
1015	chr3	137986121	137990937	4817	Distal Intergenic	137998735	138033655	34921	51208	ENST00000343735.8	CLDN18	-7798
1016	chr22	22394990	22395438	449	5' UTR	22322472	22322969	498	96610	ENST00000390290.3	BMS1P20	72518
1017	chr4	146033003	146034787	1785	Distal Intergenic	146111159	146111705	547	100505545	ENST00000505848.1	LINC01095	76918
1018	chr10	131754721	131756998	2278	Distal Intergenic	131772398	131790199	17802	399827	ENST00000341866.3	LINC01164	33201
1019	chr2	109470054	109470268	215	Intron (ENST00000309415.7/344558, intron 8 of 9)	109564215	109567853	3639	151011	ENST00000483047.5	SEPTIN10	97585
1020	chr17	35787873	35789628	1756	Intron (ENST00000603067.5/8148, intron 1 of 3)	35766340	35795582	29243	79148	ENST00000605424.5	MMP28	5954
1021	chr6	166598775	166598989	215	Intron (ENST00000265678.8/6196, intron 1 of 20)	166409364	166627243	217880	6196	ENST00000265678.8	RPS6KA2	28254
1022	chr20	52363744	52363958	215	Intron (ENST00000454600.1/101927700, intron 4 of 6)	52210645	52646741	436097	101927700	ENST00000454600.1	LINC01524	153099
1023	chr4	173212206	173212420	215	Intron (ENST00000265000.8/51809, intron 1 of 11)	173131928	173169652	37725	101930370	ENST00000500914.6	LOC101930370	-42554
1024	chr14	75182286	75185247	2962	Distal Intergenic	75131470	75176631	45162	10972	ENST00000303575.8	TMED10	-5655
1025	chr7	43301980	43302194	215	Intron (ENST00000395891.6/23072, intron 3 of 29)	43249137	43311993	62857	23072	ENST00000464944.1	HECW1	52843
1026	chr14	68136799	68148237	11439	Intron (ENST00000479335.5/5890, intron 8 of 11)	68000279	68497257	496979	5890	ENST00000557045.5	RAD51B	136520
1027	chr5	17340697	17342126	1430	Distal Intergenic	17378906	17387310	8405	401177	ENST00000505158.1	LINC02111	45184
1028	chr15	22894284	22896843	2560	Intron (ENST00000617928.4/23191, intron 22 of 30)	22869466	22905440	35975	23191	ENST00000619348.4	CYFIP1	8597
1029	chr1	15144787	15145115	329	Intron (ENST00000310916.6/200197, intron 1 of 5)	15115952	15152402	36451	200197	ENST00000404665.3	TMEM51-AS1	7287
1030	chr5	150298542	150300581	2040	Promoter (2-3kb)	150296343	150302953	6611	340075	ENST00000328668.7	ARSI	2372
1031	chr3	65169780	65170322	543	Distal Intergenic	65375765	65380831	5067	9223	ENST00000480729.1	MAGI1	210509
1032	chr6	25951707	25955340	3634	Distal Intergenic	25962802	25991226	28425	10475	ENST00000357085.4	TRIM38	-7462
1033	chr6	82003426	82004221	796	Distal Intergenic	81845185	81933480	88296	102724168	ENST00000418567.1	LINC02542	-69946
1034	chr13	28495526	28495740	215	Promoter (<=1kb)	28385567	28495145	109579	2321	ENST00000639477.1	FLT1	-381
1035	chr8	141026134	141029252	3119	Distal Intergenic	140925689	141002216	76528	5747	ENST00000519635.1	PTK2	-23918
1036	chr15	46892411	46892732	322	Distal Intergenic	47184101	47774221	590121	80031	ENST00000558014.5	SEMA6D	-291369
1037	chr8	29516681	29517268	588	Distal Intergenic	29333064	29350668	17605	1846	ENST00000240100.6	DUSP4	-166013
1038	chr19	53094949	53095294	346	Intron (ENST00000599056.5/90338, intron 1 of 6)	53091034	53103327	12294	90338	ENST00000599980.1	ZNF160	8033
1039	chr5	128573536	128573750	215	Intron (ENST00000508645.5/28965, intron 1 of 6)	128446076	128538223	92148	2201	ENST00000514742.1	FBN2	-35313
1040	chr8	133129114	133129509	396	Intron (ENST00000220616.8/7038, intron 45 of 47)	133133387	133134877	1491	7038	ENST00000522691.1	TG	-3878
1041	chr1	189961817	189962929	1113	Distal Intergenic	190216952	190226196	9245	339479	ENST00000463404.1	BRINP3	263267
1042	chr12	59940038	59942386	2349	Distal Intergenic	59769059	59775035	5977	9194	ENST00000548444.1	SLC16A7	170979
1043	chr13	34207172	34207514	343	Distal Intergenic	34348043	34614170	266128	105370158	ENST00000605909.1	LINC02343	-140529
1044	chr7	5222329	5222792	464	Exon (ENST00000288828.8/26100, exon 8 of 13)	5225950	5231723	5774	26100	ENST00000471851.1	WIPI2	-3158
1045	chr13	23750681	23755517	4837	Promoter (1-2kb)	23730189	23756830	26642	4285	ENST00000464194.3	MIPEP	1313
1046	chr8	103337482	103337808	327	Distal Intergenic	103371515	103382997	11483	115908	ENST00000330295.9	CTHRC1	-33707
1047	chr3	78870317	78874377	4061	Intron (ENST00000618833.4/6091, intron 2 of 27)	78598811	79018544	419734	6091	ENST00000467549.5	ROBO1	144167
1048	chr1	15163220	15164100	881	Intron (ENST00000428417.5/55092, intron 1 of 2)	15164344	15171317	6974	727684	ENST00000424792.5	C1orf195	7217
1049	chr6	157701133	157702418	1286	Promoter (<=1kb)	157700387	157875149	174763	51429	ENST00000614703.4	SNX9	746
1050	chr6	12418675	12421813	3139	Distal Intergenic	12290363	12297194	6832	1906	ENST00000379375.5	EDN1	128312
1051	chr1	173638946	173639352	407	Intron (ENST00000648193.1/339416, intron 3 of 7)	173635333	173637134	1802	730159	ENST00000417563.2	TEX50	3613
1052	chr2	55855686	55856347	662	Distal Intergenic	55866907	55917780	50874	2202	ENST00000634374.1	EFEMP1	61433
1053	chr6	15081930	15082144	215	Intron (ENST00000437648.1/ENST00000437648.1, intron 1 of 3)	15246296	15522021	275726	3720	ENST00000341776.6	JARID2	-164152
1054	chr10	125151695	125153071	1377	Intron (ENST00000337195.9/1488, intron 1 of 10)	124989225	125158716	169492	1488	ENST00000531469.5	CTBP2	5645
1055	chr1	161427786	161428000	215	Exon (ENST00000637155.1/ENST00000637155.1, exon 2 of 5)	161364731	161367874	3144	257177	ENST00000367974.1	CFAP126	-59912
1056	chr11	96271476	96274165	2690	Intron (ENST00000524717.5/84441, intron 1 of 4)	96341438	96341526	89	100422991	ENST00000582890.3	MIR1260B	-67273
1057	chr12	59368162	59368508	347	Intron (ENST00000547088.1/ENST00000547088.1, intron 3 of 3)	59596067	59780213	184147	9194	ENST00000552432.5	SLC16A7	-227559
1058	chr18	44635605	44639054	3450	Distal Intergenic	44680173	44877414	197242	26040	ENST00000426838.8	SETBP1	-41119
1059	chr5	112771149	112772906	1758	Intron (ENST00000507379.5/324, intron 3 of 13)	112738332	112839508	101177	324	ENST00000512211.6	APC	32817
1060	chr12	2282486	2282932	447	Intron (ENST00000335762.9/775, intron 3 of 47)	2269776	2288937	19162	100874370	ENST00000542680.1	CACNA1C-IT3	12710
1061	chr2	188333936	188334206	271	Intron (ENST00000409843.5/51454, intron 1 of 12)	188297492	188297588	97	693146	ENST00000385216.1	MIR561	36444
1062	chr2	18180558	18181082	525	Intron (ENST00000465292.5/3790, intron 3 of 4)	17879383	17931231	51849	3790	ENST00000419802.1	KCNS3	301175
1063	chr1	22254519	22261935	7417	Distal Intergenic	22266239	22266300	62	100616433	ENST00000581169.1	MIR4418	-4304
1064	chr6	131475871	131481363	5493	Distal Intergenic	131573144	131584332	11189	383	ENST00000368087.7	ARG1	-91781
1065	chr6	33356563	33358152	1590	Distal Intergenic	33321386	33329286	7901	1616	ENST00000453407.7	DAXX	-27277
1066	chr20	55271714	55272053	340	Distal Intergenic	55408898	55426642	17745	102723578	ENST00000627529.2	LINC01440	-136845
1067	chr2	222730292	222731632	1341	Distal Intergenic	222671786	222709930	38145	116255	ENST00000446656.3	MOGAT1	58506
1068	chr5	136775403	136776252	850	Distal Intergenic	136978454	136979500	1047	6695	ENST00000515091.1	SPOCK1	203248
1069	chr9	91164299	91166388	2090	Exon (ENST00000423719.3/ENST00000423719.3, exon 2 of 2)	91170669	91182717	12049	100129347	ENST00000437389.5	LINC00484	-4281
1070	chr15	59803073	59804253	1181	Distal Intergenic	59659146	59689534	30389	663	ENST00000267859.7	BNIP2	-113539
1071	chr6	167135244	167135566	323	Intron (ENST00000609590.1/1235, intron 11 of 12)	167122771	167138946	16176	1235	ENST00000349984.6	CCR6	12473
1072	chr2	222981751	222982959	1209	Distal Intergenic	222933018	222941824	8807	2181	ENST00000495541.1	ACSL3	48733
1073	chr2	112889360	112889745	386	Distal Intergenic	112912971	112918882	5912	27178	ENST00000263326.7	IL37	-23226
1074	chr8	95202648	95202970	323	Promoter (1-2kb)	95204456	95432666	228211	100616530	ENST00000517655.1	C8orf37-AS1	-1486
1075	chrX	19830320	19830737	418	Intron (ENST00000397821.7/30011, intron 2 of 17)	19535693	19799751	264059	30011	ENST00000379698.8	SH3KBP1	-30569
1076	chr5	58439904	58440118	215	Distal Intergenic	58454706	58455116	411	10769	ENST00000511326.1	PLK2	14998
1077	chr6	31003724	31011604	7881	Promoter (<=1kb)	31010474	31035402	24929	100507679	ENST00000561890.1	MUC22	0
1078	chr4	78658379	78658791	413	Intron (ENST00000503259.5/100505702, intron 2 of 2)	78646217	78682699	36483	100505702	ENST00000512322.1	LINC01094	12162
1079	chrX	119035375	119037757	2383	Distal Intergenic	118976332	119018355	42024	79836	ENST00000422289.3	LONRF3	59043
1080	chr3	54842446	54843785	1340	Intron (ENST00000415676.6/55799, intron 17 of 38)	54874605	54901255	26651	100874237	ENST00000471265.1	CACNA2D3-AS1	57470
1081	chr15	24682152	24683564	1413	3' UTR	24675868	24683393	7526	23742	ENST00000329468.3	NPAP1	6284
1082	chr3	18501432	18502639	1208	Intron (ENST00000414198.5/101927777, intron 4 of 4)	18525791	18527231	1441	101927777	ENST00000616514.1	SATB1-AS1	-23152
1083	chr8	41748321	41748535	215	Intron (ENST00000347528.8/286, intron 2 of 41)	41655324	41706179	50856	286	ENST00000520299.5	ANK1	-42142
1084	chr7	142151277	142153223	1947	Intron (ENST00000477922.3/93432, intron 15 of 47)	142171170	142221288	50119	93432	ENST00000496337.1	MGAM2	-17947
1085	chr8	48589579	48592985	3407	Exon (ENST00000430626.1/ENST00000430626.1, exon 1 of 2)	48620465	48623895	3431	101929217	ENST00000521660.1	LOC101929217	-27480
1086	chr2	46097408	46099051	1644	Intron (ENST00000306156.7/5581, intron 11 of 14)	46073796	46151164	77369	5581	ENST00000480633.1	PRKCE	23612
1087	chrX	127972837	127973607	771	Distal Intergenic	128050962	128052398	1437	139741	ENST00000371124.4	ACTRT1	78791
1088	chr10	1115742	1116064	323	Intron (ENST00000358220.5/22884, intron 11 of 13)	1123807	1129252	5446	22884	ENST00000482165.1	WDR37	-7743
1089	chr6	132004761	132005805	1045	Intron (ENST00000435287.1/ENST00000435287.1, intron 1 of 1)	131948176	131951373	3198	1490	ENST00000367976.3	CCN2	-53388
1090	chr21	23003631	23004692	1062	Distal Intergenic	23079284	23079392	109	102466967	ENST00000619419.1	MIR6130	-74592
1091	chr2	12317616	12319392	1777	Intron (ENST00000412294.5/100506457, intron 4 of 5)	12314317	12561265	246949	100506457	ENST00000412606.1	MIR3681HG	3299
1092	chr18	35861501	35862351	851	Distal Intergenic	35904818	35904926	109	406963	ENST00000385062.1	MIR187	42575
1093	chr5	84382342	84383176	835	Promoter (1-2kb)	83940600	84384386	443787	10085	ENST00000380138.3	EDIL3	1210
1094	chr9	105959953	105960167	215	Distal Intergenic	105993310	106702662	709353	100996590	ENST00000637185.1	LINC01505	-33143
1095	chr11	15713885	15715776	1892	Exon (ENST00000524613.1/ENST00000524613.1, exon 3 of 9)	15643885	15705368	61484	102724957	ENST00000532242.1	LOC102724957	70000
1096	chr17	80331913	80332127	215	Exon (ENST00000508628.6/57674, exon 22 of 69)	80337514	80339446	1933	57674	ENST00000571908.1	RNF213	-5387
1097	chr11	16403424	16404328	905	Promoter (<=1kb)	15972708	16402863	430156	55553	ENST00000528429.5	SOX6	-561
1098	chr3	133894605	133896429	1825	Promoter (<=1kb)	133824239	133895816	71578	51560	ENST00000285208.8	RAB6B	0
1099	chr3	52527067	52527539	473	Promoter (<=1kb)	52524385	52527684	3300	64943	ENST00000463947.5	NT5DC2	145
1100	chr15	100985867	100987337	1471	Intron (ENST00000388948.7/79705, intron 4 of 33)	101021709	101024949	3241	79705	ENST00000525617.2	LRRK1	-34372
1101	chr8	59393964	59395847	1884	Distal Intergenic	59119946	59121315	1370	100505501	ENST00000517898.1	LOC100505501	274018
1102	chrX	64332725	64334523	1799	Intron (ENST00000374852.3/55613, intron 10 of 13)	64331414	64345158	13745	55613	ENST00000478487.5	MTMR8	10635
1103	chr6	49769834	49770431	598	Distal Intergenic	49785651	49787307	1657	5232	ENST00000304801.5	PGK2	16876
1104	chr12	76319318	76320790	1473	Distal Intergenic	76344506	76348415	3910	79738	ENST00000650064.1	BBS10	27625
1105	chr3	177970365	177970829	465	Distal Intergenic	177827783	177896932	69150	102724550	ENST00000434309.1	LINC02015	142582
1106	chr12	124046157	124046371	215	Intron (ENST00000389727.8/100533183, intron 2 of 4)	123997706	124011824	14119	144348	ENST00000539501.1	ZNF664	48451
1107	chr9	73173661	73174268	608	Distal Intergenic	73168098	73170393	2296	301	ENST00000491192.1	ANXA1	5563
1108	chr12	127516095	127516497	403	Distal Intergenic	127634096	127636095	2000	101927637	ENST00000540490.5	LINC02411	119598
1109	chr8	127803390	127803604	215	Exon (ENST00000523068.1/5820, exon 2 of 3)	127796033	127890983	94951	5820	ENST00000523068.1	PVT1	7357
1110	chr4	107602763	107602977	215	Intron (ENST00000514815.1/9061, intron 1 of 1)	107590276	107631804	41529	9061	ENST00000514815.1	PAPSS1	28827
1111	chr7	40156503	40157789	1287	Intron (ENST00000401647.6/79783, intron 1 of 12)	40135016	40499514	364499	79783	ENST00000416370.1	SUGCT	21487
1112	chr18	10054987	10055450	464	Distal Intergenic	9936727	9954477	17751	9218	ENST00000583475.1	VAPA	118260
1113	chr8	57312529	57313045	517	Distal Intergenic	57343787	57364857	21071	101929488	ENST00000519714.1	LOC101929488	-30742
1114	chr21	41688733	41689120	388	Intron (ENST00000413718.1/54090, intron 2 of 2)	41679181	41697336	18156	54090	ENST00000413718.1	LINC00111	9552
1115	chr2	168241975	168242393	419	Intron (ENST00000355999.4/27347, intron 1 of 17)	167954020	168248141	294122	27347	ENST00000355999.4	STK39	5748
1116	chr1	164640225	164641927	1703	Exon (ENST00000474046.1/ENST00000474046.1, exon 2 of 5)	164630981	164799889	168909	5087	ENST00000482110.5	PBX1	9244
1117	chr11	134542131	134542405	275	Distal Intergenic	134479299	134505661	26363	283177	ENST00000532886.2	LOC283177	62832
1118	chr11	70306052	70307381	1330	Intron (ENST00000253925.11/8500, intron 2 of 27)	70326344	70384403	58060	8500	ENST00000526262.5	PPFIA1	-18963
1119	chr4	121598979	121599193	215	Distal Intergenic	121669312	121672558	3247	308	ENST00000515717.1	ANXA5	73365
1120	chr18	51134598	51136788	2191	Distal Intergenic	51077251	51078870	1620	4089	ENST00000586253.1	SMAD4	57347
1121	chr4	174592520	174593573	1054	Distal Intergenic	174493152	174523154	30003	3248	ENST00000506910.5	HPGD	-69366
1122	chr7	50548978	50552688	3711	Intron (ENST00000357936.9/1644, intron 1 of 14)	50458440	50544119	85680	1644	ENST00000431062.5	DDC	-4859
1123	chr2	190806603	190813928	7326	Distal Intergenic	190880827	190965552	84726	2744	ENST00000320717.7	GLS	-66899
1124	chr11	117930257	117930596	340	Promoter (<=1kb)	117907454	117929459	22006	84000	ENST00000526090.1	TMPRSS13	-798
1125	chrX	42615871	42616140	270	Intron (ENST00000411879.5/ENST00000411879.5, intron 6 of 7)	42777368	42778247	880	80316	ENST00000378131.3	PPP1R2C	162107
1126	chrX	44698807	44699567	761	Distal Intergenic	44844004	44844888	885	63904	ENST00000339042.5	DUSP21	-144437
1127	chr2	144370854	144371068	215	Intron (ENST00000639389.1/9839, intron 1 of 1)	144390552	144396461	5910	9839	ENST00000637873.1	ZEB2	25393
1128	chr21	14591401	14592082	682	Exon (ENST00000449214.1/100874190, exon 3 of 5)	14485229	14583402	98174	64092	ENST00000285670.7	SAMSN1	-7999
1129	chr1	193292968	193293182	215	Distal Intergenic	193304745	193365953	61209	101929184	ENST00000420807.1	LINC01031	-11563
1130	chr15	101555711	101559067	3357	Distal Intergenic	101304746	101525202	220457	5046	ENST00000557794.5	PCSK6	-30509
1131	chr6	27293475	27295073	1599	Intron (ENST00000429945.1/ENST00000429945.1, intron 1 of 1)	27309063	27312170	3108	94026	ENST00000444565.1	POM121L2	17097
1132	chr9	38078822	38080791	1970	Distal Intergenic	37919134	38069211	150078	6461	ENST00000377707.3	SHB	-9611
1133	chr8	83133698	83134935	1238	Distal Intergenic	82912104	82961926	49823	101927141	ENST00000524359.1	LOC101927141	221594
1134	chr9	129776789	129778683	1895	Distal Intergenic	129738331	129753047	14717	9536	ENST00000340607.4	PTGES	-23742
1135	chr22	37638750	37641614	2865	Promoter (<=1kb)	37639475	37656119	16645	23616	ENST00000357436.5	SH3BP1	0
1136	chr5	103441653	103442267	615	Intron (ENST00000602846.5/ENST00000602846.5, intron 3 of 4)	103528434	103541985	13552	102467212	ENST00000503367.2	LINC02115	99718
1137	chr12	95198135	95207560	9426	Promoter (1-2kb)	95189192	95208956	19765	55785	ENST00000550368.1	FGD6	1396
1138	chr4	128946659	128947101	443	Intron (ENST00000281142.9/132320, intron 15 of 20)	128864921	128936704	71784	132320	ENST00000503565.5	SCLT1	-9955
1139	chr18	8206609	8210983	4375	Intron (ENST00000580170.5/5797, intron 14 of 32)	8244057	8251821	7765	5797	ENST00000578093.1	PTPRM	-33074
1140	chr12	91888127	91888395	269	Distal Intergenic	91988323	91993529	5207	256021	ENST00000551764.5	LINC01619	105134
1141	chr4	188975724	188977429	1706	Distal Intergenic	188776657	188785511	8855	105377610	ENST00000504165.1	LINC02508	199067
1142	chr4	76801624	76804924	3301	Exon (ENST00000449007.1/ENST00000449007.1, exon 1 of 2)	76716001	76730935	14935	57619	ENST00000644244.1	SHROOM3	85623
1143	chr10	18750134	18750454	321	Distal Intergenic	18659405	18681639	22235	221079	ENST00000377275.3	ARL5B	90729
1144	chr10	72025877	72034674	8798	Distal Intergenic	72063003	72068865	5863	9806	ENST00000460053.1	SPOCK2	34191
1145	chr3	183999060	183999605	546	Intron (ENST00000334444.10/10057, intron 2 of 29)	184006338	184011419	5082	100873982	ENST00000422946.1	ABCC5-AS1	-6733
1146	chr12	79057343	79059107	1765	Intron (ENST00000393240.7/6857, intron 4 of 11)	79046318	79296139	249822	6857	ENST00000446242.3	SYT1	11025
1147	chr20	38083086	38085956	2871	Promoter (<=1kb)	38083896	38090259	6364	58490	ENST00000471511.1	RPRD1B	0
1148	chr11	24253114	24253550	437	Intron (ENST00000527283.5/ENST00000527283.5, intron 4 of 5)	24496970	24893337	396368	338645	ENST00000531187.5	LUZP2	-243420
1149	chr13	106470859	106477223	6365	Distal Intergenic	106489810	106516447	26638	1948	ENST00000643990.1	EFNB2	39224
1150	chr17	13435570	13435881	312	Distal Intergenic	13543529	13543646	118	100302287	ENST00000408771.1	MIR548H3	107765
1151	chr17	1200693	1201230	538	Intron (ENST00000575934.5/29, intron 1 of 3)	1003527	1187322	183796	29	ENST00000544583.6	ABR	-13371
1152	chr13	74026394	74027781	1388	Distal Intergenic	73812873	73995056	182184	11278	ENST00000472022.1	KLF12	-31338
1153	chr3	170240348	170240893	546	Intron (ENST00000295797.4/5584, intron 2 of 17)	170222365	170305981	83617	5584	ENST00000295797.4	PRKCI	17983
1154	chr1	144560702	144561220	519	Exon (ENST00000610976.1/ENST00000610976.1, exon 1 of 1)	144551779	144551943	165	6063	ENST00000617626.1	RNVU1-11	-8759
1155	chr7	20307973	20308409	437	Promoter (2-3kb)	20305711	20311712	6002	101927769	ENST00000455373.1	LOC101927769	2262
1156	chr9	28887484	28888228	745	Promoter (<=1kb)	28888879	28888955	77	100126316	ENST00000401120.3	MIR873	727
1157	chr17	52678811	52679118	308	Distal Intergenic	52862121	52899588	37468	105371831	ENST00000412360.1	LINC02089	-183003
1158	chr7	72801349	72802282	934	Intron (ENST00000612372.4/441250, intron 4 of 11)	72558744	72828174	269431	441250	ENST00000612372.4	TYW1B	25892
1159	chr3	195185029	195185582	554	Promoter (<=1kb)	195068601	195184798	116198	152002	ENST00000437101.5	XXYLT1	-231
1160	chr22	29480672	29482279	1608	Promoter (<=1kb)	29480230	29491390	11161	4744	ENST00000310624.6	NEFH	442
1161	chr2	80274072	80275394	1323	Intron (ENST00000466387.5/1496, intron 11 of 21)	80301880	80304274	2395	347730	ENST00000409148.1	LRRTM1	28880
1162	chr1	153582723	153585647	2925	Distal Intergenic	153561340	153567890	6551	6273	ENST00000368710.5	S100A2	-14833
1163	chr19	50581243	50581929	687	Distal Intergenic	50518997	50568045	49049	94030	ENST00000600381.1	LRRC4B	-13198
1164	chr14	95918197	95919055	859	Intron (ENST00000504119.1/100507043, intron 1 of 1)	95876819	95923055	46237	100507043	ENST00000554321.1	TUNAR	41378
1165	chr5	147448573	147449927	1355	Intron (ENST00000398514.7/1809, intron 1 of 13)	147408728	147453665	44938	1809	ENST00000519672.1	DPYSL3	3738
1166	chr17	44438925	44439139	215	Promoter (2-3kb)	44396574	44436787	40214	23131	ENST00000635257.1	GPATCH8	-2138
1167	chr19	14247701	14249721	2021	Distal Intergenic	14147743	14206187	58445	22859	ENST00000340736.10	ADGRL1	-41514
1168	chr5	57003280	57004130	851	Distal Intergenic	56947032	56971675	24644	166968	ENST00000497185.2	MIER3	-31605
1169	chr10	117478020	117478293	274	Intron (ENST00000549104.1/ENST00000549104.1, intron 2 of 2)	117490649	117494688	4040	196047	ENST00000423419.1	EMX2OS	16395
1170	chrX	110040600	110040925	326	Intron (ENST00000372072.7/84187, intron 1 of 5)	110055329	110055426	98	724022	ENST00000385278.3	MIR652	-14404
1171	chr5	121916886	121917100	215	Distal Intergenic	121961961	122028619	66659	153443	ENST00000339397.4	SRFBP1	-44861
1172	chr3	160885397	160886672	1276	Intron (ENST00000497343.5/151742, intron 1 of 2)	160870598	161069844	199247	151742	ENST00000480117.1	PPM1L	14799
1173	chr5	35877170	35877965	796	Promoter (1-2kb)	35875414	35876434	1021	3575	ENST00000505875.1	IL7R	1756
1174	chr1	148262606	148265596	2991	Exon (ENST00000363009.1/ENST00000363009.1, exon 1 of 1)	148208088	148255012	46925	101927468	ENST00000628063.2	LOC101927468	-7594
1175	chr17	15786162	15786651	490	Promoter (<=1kb)	15786618	15787575	958	4213	ENST00000495167.3	MEIS3P1	0
1176	chr12	94168071	94168636	566	Exon (ENST00000551029.1/ENST00000551029.1, exon 2 of 2)	94158101	94209629	51529	10154	ENST00000551850.1	PLXNC1	9970
1177	chr16	17271194	17276534	5341	Intron (ENST00000261381.6/64131, intron 2 of 11)	17198031	17259028	60998	64131	ENST00000575674.1	XYLT1	-12166
1178	chr11	129016568	129016838	271	Intron (ENST00000310343.13/9743, intron 10 of 21)	128967947	129024193	56247	9743	ENST00000392657.7	ARHGAP32	7355
1179	chr19	10616402	10616669	268	Intron (ENST00000590382.5/57153, intron 1 of 6)	10625258	10644559	19302	57153	ENST00000335757.9	SLC44A2	-8589
1180	chr1	162878247	162879523	1277	Distal Intergenic	162851316	162868815	17500	339512	ENST00000367912.6	CCDC190	-9432
1181	chr1	218645612	218647486	1875	Distal Intergenic	218524840	218525978	1139	440714	ENST00000491260.2	C1orf143	120772
1182	chr1	244351503	244351717	215	Promoter (<=1kb)	244352635	244389091	36457	200159	ENST00000308105.4	C1orf100	-918
1183	chr12	89690579	89690851	273	Intron (ENST00000428670.7/490, intron 1 of 20)	89588072	89708831	120760	490	ENST00000428670.7	ATP2B1	17980
1184	chr2	223043382	223043596	215	Distal Intergenic	223051814	223055637	3824	23704	ENST00000281830.3	KCNE4	-8218
1185	chr15	59174621	59176409	1789	Intron (ENST00000288235.8/4643, intron 19 of 27)	59171183	59171262	80	100313886	ENST00000517221.1	MIR2116	-3359
1186	chr6	161486014	161486803	790	Intron (ENST00000366898.5/5071, intron 9 of 11)	161350099	161569420	219322	5071	ENST00000610470.4	PRKN	82617
1187	chr4	102729983	102730369	387	Promoter (1-2kb)	102714438	102728606	14169	4126	ENST00000646451.1	MANBA	-1377
1188	chr10	132482250	132482735	486	Distal Intergenic	132445189	132449408	4220	170393	ENST00000392630.7	C10orf91	37061
1189	chr21	15837416	15838504	1089	Intron (ENST00000285679.10/29761, intron 17 of 23)	15842518	15874518	32001	29761	ENST00000449491.1	USP25	-4014
1190	chr6	35354138	35355605	1468	Intron (ENST00000360694.7/5467, intron 2 of 7)	35342614	35428178	85565	5467	ENST00000311565.4	PPARD	11524
1191	chr14	55371970	55375932	3963	Intron (ENST00000558189.1/22863, intron 6 of 6)	55366392	55391302	24911	22863	ENST00000558189.1	ATG14	15370
1192	chr11	23921768	23922552	785	Distal Intergenic	23419105	23419190	86	102465860	ENST00000620877.1	MIR8054	-502578
1193	chr8	119594988	119595202	215	Promoter (1-2kb)	119557409	119593008	35600	5168	ENST00000522167.5	ENPP2	-1980
1194	chr12	59973096	59973376	281	Distal Intergenic	59769059	59775035	5977	9194	ENST00000548444.1	SLC16A7	204037
1195	chr1	27772048	27791373	19326	Promoter (<=1kb)	27773183	27824452	51270	23673	ENST00000373943.8	STX12	0
1196	chr10	130487062	130488063	1002	Distal Intergenic	130179374	130180382	1009	10539	ENST00000496195.1	GLRX3	307688
1197	chr10	102058366	102058580	215	Promoter (2-3kb)	102029448	102056193	26746	79591	ENST00000311122.5	ARMH3	-2173
1198	chrX	115954094	115955126	1033	Intron (ENST00000430756.2/642776, intron 1 of 2)	115917271	115969089	51819	642776	ENST00000430756.2	DANT2	13963
1199	chrX	95839765	95842516	2752	Distal Intergenic	96337236	96337912	677	643486	ENST00000605735.1	BRDTP1	495396
1200	chr6	150747486	150747700	215	Intron (ENST00000644968.1/57480, intron 2 of 15)	150768686	150842056	73371	57480	ENST00000475490.1	PLEKHG1	-20986
1201	chr6	112690669	112691527	859	Distal Intergenic	112347330	112351296	3967	442247	ENST00000441065.2	RFPL4B	343339
1202	chr2	28082435	28082878	444	Intron (ENST00000344773.6/9577, intron 6 of 12)	27996367	27996449	83	100422965	ENST00000584745.1	MIR4263	86068
1203	chr15	92735983	92736305	323	Intron (ENST00000557398.2/400451, intron 1 of 3)	92795647	92796439	793	728619	ENST00000557146.1	ASB9P1	-59342
1204	chr19	42764972	42765818	847	Promoter (<=1kb)	42752686	42765678	12993	440533	ENST00000404209.8	PSG8	0
1205	chr20	30296093	30300642	4550	Distal Intergenic	30278906	30288479	9574	400841	ENST00000380888.4	LINC01597	-7614
1206	chr9	28923062	28928812	5751	Distal Intergenic	28888879	28888955	77	100126316	ENST00000401120.3	MIR873	-34107
1207	chr6	22737810	22738083	274	Distal Intergenic	22569493	22571666	2174	154150	ENST00000510882.3	HDGFL1	168317
1208	chr8	14530990	14531204	215	Intron (ENST00000382080.5/137868, intron 2 of 7)	14090374	14554926	464553	137868	ENST00000421524.6	SGCZ	23722
1209	chr3	30082189	30082748	560	Distal Intergenic	29988073	29991715	3643	27303	ENST00000497274.1	RBMS3	94116
1210	chr15	101674669	101675072	404	Intron (ENST00000335968.7/123283, intron 13 of 18)	101654469	101664442	9974	123283	ENST00000559492.1	TARSL2	-10227
1211	chr7	137591228	137592476	1249	Intron (ENST00000453654.6/9162, intron 12 of 32)	137463489	137581928	118440	9162	ENST00000460662.2	DGKI	-9300
1212	chr14	101355125	101355339	215	Distal Intergenic	101405987	101407922	1936	338002	ENST00000556987.1	LINC00524	52583
1213	chr3	170135815	170136108	294	Promoter (<=1kb)	170129385	170136670	7286	80012	ENST00000497171.1	PHC3	562
1214	chr2	166434462	166434676	215	Intron (ENST00000619410.4/6332, intron 15 of 25)	166461755	166465526	3772	6332	ENST00000497562.1	SCN7A	30850
1215	chr11	128391480	128392488	1009	Distal Intergenic	128462544	128463950	1407	2113	ENST00000530924.2	ETS1	71462
1216	chr20	12573688	12574160	473	Distal Intergenic	12950338	12951627	1290	100505515	ENST00000432244.1	LINC01723	-376178
1217	chr1	182100295	182103165	2871	Distal Intergenic	182054570	182061712	7143	127665	ENST00000339948.3	ZNF648	-38583
1218	chr12	77592219	77592596	378	Intron (ENST00000550042.2/89795, intron 2 of 8)	77830905	78050007	219103	89795	ENST00000549464.5	NAV3	-238309
1219	chrX	133922903	133923790	888	Intron (ENST00000370818.7/2719, intron 2 of 7)	133536124	133985449	449326	2719	ENST00000631057.2	GPC3	61659
1220	chr2	79966179	79967061	883	Intron (ENST00000466387.5/1496, intron 11 of 21)	79866495	79866583	89	102465877	ENST00000622224.1	MIR8080	-99596
1221	chr4	188433307	188433579	273	Intron (ENST00000512839.5/401164, intron 1 of 4)	188455578	188538552	82975	401164	ENST00000510832.5	LINC01060	-21999
1222	chr6	27047520	27047997	478	Distal Intergenic	27020636	27023924	3289	100133205	ENST00000420081.1	LINC00240	26884
1223	chr4	40409897	40410269	373	Distal Intergenic	40432703	40466645	33943	54502	ENST00000515809.1	RBM47	56376
1224	chr8	42657934	42658205	272	Distal Intergenic	42697376	42708758	11383	1142	ENST00000531610.5	CHRNB3	-39171
1225	chr3	264342	264668	327	Intron (ENST00000256509.6/10752, intron 2 of 27)	217535	328223	110689	10752	ENST00000449294.6	CHL1	46807
1226	chr6	41966578	41968049	1472	Intron (ENST00000616010.4/896, intron 2 of 4)	41934933	41941848	6916	896	ENST00000372991.8	CCND3	-24730
1227	chr8	130134081	130134295	215	Intron (ENST00000524124.5/50807, intron 9 of 23)	130115577	130118779	3203	50807	ENST00000521057.1	ASAP1	-15302
1228	chr11	130772291	130773414	1124	Distal Intergenic	130844753	130847590	2838	100507431	ENST00000533434.1	LINC02551	74176
1229	chr3	115245763	115245977	215	Distal Intergenic	114314501	115147271	832771	26137	ENST00000357258.8	ZBTB20	-98492
1230	chrX	39367295	39367568	274	Exon (ENST00000431646.1/101927449, exon 5 of 6)	39367289	39379226	11938	101927449	ENST00000648247.1	LINC01282	11658
1231	chr9	97038815	97039911	1097	Promoter (<=1kb)	97029679	97039643	9965	1515	ENST00000538255.5	CTSV	0
1232	chr20	10654994	10655317	324	Promoter (2-3kb)	10641580	10652722	11143	182	ENST00000617965.2	JAG1	-2272
1233	chr20	19417027	19417241	215	Intron (ENST00000328041.10/57419, intron 2 of 16)	19242302	19284596	42295	100130264	ENST00000319682.2	LOC100130264	-132431
1234	chr8	115193603	115196089	2487	Distal Intergenic	115414429	115492221	77793	7227	ENST00000518018.1	TRPS1	296132
1235	chr8	133006538	133006902	365	Intron (ENST00000220616.8/7038, intron 35 of 47)	133017699	133029979	12281	7038	ENST00000518108.1	TG	-10797
1236	chr22	42696929	42699282	2354	Promoter (1-2kb)	42692122	42695633	3512	53947	ENST00000249005.3	A4GALT	-1296
1237	chr15	78294836	78295050	215	Exon (ENST00000558311.5/80349, exon 3 of 11)	78283468	78299570	16103	80349	ENST00000560569.5	WDR61	4520
1238	chr3	190097810	190098024	215	Intron (ENST00000319332.9/55214, intron 1 of 14)	189988907	190116648	127742	55214	ENST00000444866.5	P3H2	18624
1239	chr9	21510436	21510768	333	Promoter (1-2kb)	21512115	21512185	71	407035	ENST00000362307.1	MIR31	1417
1240	chr12	89235564	89237781	2218	Intron (ENST00000549278.1/ENST00000549278.1, intron 1 of 3)	89349072	89351171	2100	1848	ENST00000547291.1	DUSP6	113390
1241	chr8	121159178	121167598	8421	Distal Intergenic	120535745	120813273	277529	6641	ENST00000395601.7	SNTB1	-345905
1242	chr6	131106261	131109116	2856	Distal Intergenic	131135666	131283535	147870	9465	ENST00000431975.6	AKAP7	-26550
1243	chr1	5856263	5856639	377	Distal Intergenic	5862672	5862741	70	100616421	ENST00000582517.1	MIR4689	6102
1244	chr1	94600454	94600891	438	Distal Intergenic	94657925	94658250	326	101928079	ENST00000456551.1	SLC44A3-AS1	57359
1245	chr13	29402002	29402856	855	Intron (ENST00000612955.4/23281, intron 8 of 15)	29428627	29503736	75110	23281	ENST00000380808.6	MTUS2	-25771
1246	chr15	39492430	39492700	271	Distal Intergenic	39581079	39582407	1329	7057	ENST00000397591.2	THBS1	-88379
1247	chr10	123782272	123782856	585	Intron (ENST00000368854.7/119587, intron 7 of 19)	123880209	123887166	6958	119587	ENST00000481775.1	CPXM2	104310
1248	chr8	130105683	130105950	268	Intron (ENST00000524124.5/50807, intron 18 of 23)	130076397	130112414	36018	50807	ENST00000520189.1	ASAP1	6464
1249	chr11	71283237	71284953	1717	Distal Intergenic	70907635	71252577	344943	22941	ENST00000608988.5	SHANK2	-30660
1250	chr2	152393549	152393858	310	Intron (ENST00000288670.13/114793, intron 1 of 25)	152335237	152649834	314598	114793	ENST00000288670.13	FMNL2	58312
1251	chr15	79332599	79333229	631	Intron (ENST00000424155.6/23423, intron 2 of 2)	79315931	79322822	6892	23423	ENST00000558562.1	TMED3	16668
1252	chr5	147438403	147443111	4709	Intron (ENST00000398514.7/1809, intron 1 of 13)	147408728	147453665	44938	1809	ENST00000519672.1	DPYSL3	10554
1253	chr9	137919453	137919778	326	Intron (ENST00000277549.9/774, intron 6 of 45)	137867925	137892570	24646	100133077	ENST00000371390.1	LOC100133077	-26883
1254	chr5	56307154	56308720	1567	Distal Intergenic	56099678	56233359	133682	79722	ENST00000341048.8	ANKRD55	-73795
1255	chr5	157076174	157077565	1392	Distal Intergenic	157029413	157059119	29707	26762	ENST00000522693.5	HAVCR1	-17055
1256	chr6	46812541	46812755	215	Intron (ENST00000230588.8/4224, intron 6 of 13)	46793399	46839782	46384	4224	ENST00000611727.1	MEP1A	19142
1257	chr7	50827112	50828208	1097	Distal Intergenic	50590063	50793462	203400	2887	ENST00000335866.7	GRB10	-33650
1258	chr18	36482177	36483550	1374	Intron (ENST00000257209.8/80206, intron 3 of 24)	36544551	36780055	235505	80206	ENST00000591635.5	FHOD3	-61001
1259	chr3	8848478	8848692	215	Intron (ENST00000427329.5/56852, intron 3 of 3)	8890109	8902398	12290	56852	ENST00000429790.1	RAD18	53706
1260	chr22	39276907	39278090	1184	Exon (ENST00000641859.1/ENST00000641859.1, exon 2 of 3)	39223359	39244751	21393	5155	ENST00000331163.10	PDGFB	-32156
1261	chr18	10090341	10090555	215	Distal Intergenic	9936727	9954477	17751	9218	ENST00000583475.1	VAPA	153614
1262	chr10	26317071	26319748	2678	Distal Intergenic	26218193	26224760	6568	2572	ENST00000376248.1	GAD2	98878
1263	chr10	4344039	4344594	556	Distal Intergenic	4384246	4410612	26367	100507059	ENST00000454152.1	LINC00703	-39652
1264	chr4	26030875	26033566	2692	Distal Intergenic	25928215	25929425	1211	389203	ENST00000522137.1	SMIM20	102660
1265	chr12	69936094	69936308	215	Promoter (<=1kb)	69935956	69958598	22643	196446	ENST00000299350.5	MYRFL	138
1266	chr9	3931261	3931475	215	Intron (ENST00000324333.14/169792, intron 5 of 9)	3898254	3937189	38936	169792	ENST00000463680.5	GLIS3	5714
1267	chr8	141265579	141265975	397	Intron (ENST00000520137.1/57210, intron 1 of 3)	141254565	141256817	2253	105375787	ENST00000518520.1	LOC105375787	11014
1268	chrX	2755128	2755397	270	Promoter (2-3kb)	2752296	2774996	22701	100132596	ENST00000503018.1	XGY2	2832
1269	chr13	72977744	72979231	1488	Intron (ENST00000326291.10/10464, intron 16 of 17)	72969639	73016068	46430	10464	ENST00000469712.1	PIBF1	8105
1270	chrX	132940624	132940838	215	Intron (ENST00000370836.6/90161, intron 3 of 3)	132628852	132957277	328426	90161	ENST00000640529.1	HS6ST2	16439
1271	chr1	180872841	180873174	334	Intron (ENST00000367590.8/9213, intron 12 of 14)	180863764	180878290	14527	9213	ENST00000464817.1	XPR1	9077
1272	chr11	102981006	102982270	1265	Distal Intergenic	102942995	102955734	12740	4322	ENST00000260302.7	MMP13	-25272
1273	chr13	44270465	44272210	1746	Distal Intergenic	44196129	44196200	72	102465876	ENST00000610873.1	MIR8079	-74265
1274	chr4	163350967	163351181	215	Exon (ENST00000338566.7/4889, exon 4 of 4)	163326481	163344832	18352	4886	ENST00000511901.1	NPY1R	-6135
1275	chrX	41937511	41938605	1095	Distal Intergenic	41519554	41923645	404092	8573	ENST00000378154.2	CASK	-13866
1276	chr6	36571791	36573605	1815	Distal Intergenic	36594353	36599845	5493	6428	ENST00000613941.4	SRSF3	-20748
1277	chr13	59370691	59371080	390	Distal Intergenic	59666741	59696193	29453	81624	ENST00000470420.1	DIAPH3	325113
1278	chr1	9026431	9027974	1544	Promoter (<=1kb)	9003300	9026345	23046	155184	ENST00000400906.1	SLC2A7	-86
1279	chr15	88995112	88995827	716	Distal Intergenic	88898714	88913411	14698	4240	ENST00000268150.12	MFGE8	-81701
1280	chr4	89907243	89907457	215	Intron (ENST00000394980.5/22915, intron 2 of 8)	89901983	89953455	51473	22915	ENST00000508372.1	MMRN1	5260
1281	chr13	95122486	95124847	2362	Intron (ENST00000645237.1/10257, intron 19 of 30)	95073270	95148960	75691	10257	ENST00000644880.1	ABCC4	24113
1282	chrX	4830011	4832272	2262	Distal Intergenic	4627200	4633572	6373	101928201	ENST00000420725.1	LOC101928201	-196439
1283	chr4	111830126	111830399	274	Intron (ENST00000506068.1/ENST00000506068.1, intron 1 of 2)	112145397	112195256	49860	132720	ENST00000309733.5	FAM241A	-314998
1284	chr14	100822250	100822620	371	Intron (ENST00000556407.5/55384, intron 1 of 2)	100826098	100861026	34929	55384	ENST00000648456.1	MEG3	-3478
1285	chr9	106970860	106971074	215	Promoter (1-2kb)	106972142	106995682	23541	58499	ENST00000482115.1	ZNF462	-1068
1286	chr4	155391613	155394117	2505	Distal Intergenic	155352684	155376970	24287	79884	ENST00000424373.5	MAP9	-14643
1287	chr12	63668175	63668615	441	Promoter (<=1kb)	63558913	63668577	109665	283417	ENST00000324472.8	DPY19L2	0
1288	chr14	67642006	67642504	499	Exon (ENST00000261783.3/384, exon 3 of 8)	67646448	67650808	4361	384	ENST00000557319.1	ARG2	-3944
1289	chr16	77358644	77359154	511	Intron (ENST00000282849.9/170692, intron 8 of 22)	77300039	77321136	21098	170692	ENST00000568393.1	ADAMTS18	-37508
1290	chr17	1212997	1216807	3811	Intron (ENST00000575934.5/29, intron 1 of 3)	1083522	1229004	145483	29	ENST00000575934.5	ABR	12197
1291	chr11	62346772	62347095	324	Intron (ENST00000415229.6/80150, intron 2 of 6)	62337503	62357132	19630	80150	ENST00000526096.2	ASRGL1	9269
1292	chr6	30925667	30928577	2911	Promoter (2-3kb)	30923208	30926459	3252	57176	ENST00000473916.1	VARS2	2459
1293	chr4	86863309	86863523	215	Distal Intergenic	86823468	86849263	25796	345274	ENST00000273905.6	SLC10A6	-14046
1294	chr19	53097299	53099566	2268	Intron (ENST00000599056.5/90338, intron 1 of 6)	53091034	53103327	12294	90338	ENST00000599980.1	ZNF160	3761
1295	chr6	110116194	110116574	381	Intron (ENST00000392587.6/8936, intron 2 of 8)	110108528	110179649	71122	8936	ENST00000265601.7	WASF1	63075
1296	chr8	133794338	133794693	356	Intron (ENST00000517695.1/ENST00000517695.1, intron 1 of 2)	133775551	133777352	1802	101927798	ENST00000517380.1	LOC101927798	-16986
1297	chr13	106520517	106522183	1667	Exon (ENST00000646480.1/ENST00000646480.1, exon 3 of 3)	106489810	106516447	26638	1948	ENST00000643990.1	EFNB2	-4070
1298	chr12	2627710	2627924	215	Intron (ENST00000335762.9/775, intron 30 of 47)	2641458	2651747	10290	775	ENST00000483136.1	CACNA1C	-13534
1299	chr1	59155563	59155998	436	Intron (ENST00000625548.1/ENST00000625548.1, intron 1 of 4)	59132473	59151241	18769	729467	ENST00000631064.2	HSD52	-4322
1300	chr3	69432947	69434651	1705	Exon (ENST00000497757.1/ENST00000497757.1, exon 1 of 3)	69287645	69386304	98660	23150	ENST00000473188.5	FRMD4B	-46643
1301	chr2	87663484	87663809	326	Intron (ENST00000643276.1/112597, intron 3 of 17)	87629755	87629834	80	100616499	ENST00000582552.1	MIR4435-1	33729
1302	chr14	85453401	85454944	1544	Intron (ENST00000557547.1/ENST00000557547.1, intron 1 of 4)	85393948	85420052	26105	100996280	ENST00000557155.1	LINC00911	59453
1303	chr13	47934166	47934380	215	Promoter (1-2kb)	47930153	47932622	2470	100861549	ENST00000566385.2	LINC00562	-1544
1304	chrX	73915552	73919387	3836	Distal Intergenic	73944184	74012945	68762	554203	ENST00000639185.1	JPX	-24797
1305	chr18	29152964	29158228	5265	Distal Intergenic	27950966	28177446	226481	1000	ENST00000269141.7	CDH2	-975518
1306	chr1	164646392	164650209	3818	Intron (ENST00000340699.7/5087, intron 3 of 3)	164630981	164799889	168909	5087	ENST00000482110.5	PBX1	15411
1307	chr3	187500255	187500469	215	Distal Intergenic	187448845	187449450	606	105374261	ENST00000440726.1	LINC02041	51410
1308	chr3	190043810	190045761	1952	Intron (ENST00000319332.9/55214, intron 1 of 14)	189974568	189987765	13198	55214	ENST00000470925.1	P3H2	-56045
1309	chr14	76987694	76988776	1083	Intron (ENST00000647580.1/ENST00000647580.1, intron 1 of 1)	76959638	76965802	6165	105370578	ENST00000553613.1	LINC01629	28056
1310	chr1	160147847	160148820	974	Promoter (2-3kb)	160151570	160186977	35408	480	ENST00000368081.8	ATP1A4	-2750
1311	chr13	44039639	44041545	1907	Distal Intergenic	44025319	44029937	4619	121838	ENST00000423211.1	LINC00284	14320
1312	chr22	41052378	41053538	1161	Distal Intergenic	41091786	41180079	88294	2033	ENST00000263253.8	EP300	-38248
1313	chr12	31644371	31644585	215	Promoter (2-3kb)	31647160	31668075	20916	254013	ENST00000412352.6	ETFBKMT	-2575
1314	chr1	77447396	77447718	323	Intron (ENST00000354567.6/26289, intron 8 of 13)	77417693	77558729	141037	26289	ENST00000527263.1	AK5	29703
1315	chr17	62855609	62855986	378	Distal Intergenic	62808500	62836371	27872	101927877	ENST00000584542.1	LOC101927877	47109
1316	chr17	60152156	60152435	280	Promoter (2-3kb)	60149942	60170899	20958	762	ENST00000586876.1	CA4	2214
1317	chr2	21676996	21677317	322	Intron (ENST00000435237.1/ENST00000435237.1, intron 3 of 5)	21687434	21710623	23190	645949	ENST00000435682.1	LINC01822	33306
1318	chr1	34842934	34844323	1390	Intron (ENST00000426886.1/113444, intron 2 of 4)	34855689	34859045	3357	113444	ENST00000417239.1	SMIM12	14722
1319	chr8	16517744	16518017	274	Intron (ENST00000518026.5/4481, intron 1 of 5)	16175263	16567362	392100	4481	ENST00000518026.5	MSR1	49345
1320	chr9	70435523	70443062	7540	Distal Intergenic	70384597	70414624	30028	687	ENST00000377126.3	KLF9	-20899
1321	chrX	130199170	130199384	215	Distal Intergenic	130171649	130184870	13222	9363	ENST00000257017.4	RAB33A	27521
1322	chr2	224722338	224722552	215	Distal Intergenic	224773241	224787118	13878	55619	ENST00000535663.1	DOCK10	64566
1323	chr12	33025903	33026741	839	Distal Intergenic	32790745	32896840	106096	5318	ENST00000340811.8	PKP2	-129063
1324	chr9	129166297	129170583	4287	Exon (ENST00000600965.1/ENST00000600965.1, exon 1 of 1)	129175552	129178262	2711	389792	ENST00000372491.3	IER5L	7679
1325	chr8	94089127	94090018	892	Distal Intergenic	94145969	94162128	16160	1015	ENST00000520952.1	CDH17	72110
1326	chr4	185331639	185331853	215	Intron (ENST00000618785.4/83891, intron 9 of 17)	185320845	185370185	49341	83891	ENST00000504959.5	SNX25	10794
1327	chr15	70643241	70645067	1827	Distal Intergenic	70635249	70637314	2066	104548973	ENST00000629082.1	SALRNA2	7992
1328	chr4	94827053	94828494	1442	Intron (ENST00000515059.5/658, intron 1 of 12)	94757968	95158448	400481	658	ENST00000515059.5	BMPR1B	69085
1329	chr13	110353660	110355549	1890	Intron (ENST00000400163.7/1284, intron 3 of 4)	110340958	110341029	72	102465872	ENST00000616690.1	MIR8073	12702
1330	chr6	150252450	150252958	509	Distal Intergenic	150143076	150250357	107282	81706	ENST00000361131.4	PPP1R14C	109374
1331	chr3	33359568	33361629	2062	Promoter (2-3kb)	33364336	33373618	9283	25827	ENST00000461094.5	FBXL2	-2707
1332	chr1	216690880	216691202	323	Intron (ENST00000616180.4/2104, intron 1 of 6)	216503246	216715253	212008	2104	ENST00000616180.4	ESRRG	24051
1333	chr8	61749176	61751895	2720	Distal Intergenic	61714788	61714859	72	100616484	ENST00000583453.1	MIR4470	34388
1334	chr11	88050678	88051162	485	Intron (ENST00000532849.1/ENST00000532849.1, intron 1 of 2)	88113464	88175433	61970	23682	ENST00000531138.1	RAB38	124271
1335	chr6	130988562	130988776	215	Intron (ENST00000528282.5/2037, intron 1 of 16)	130956104	130978796	22693	2037	ENST00000531356.1	EPB41L2	-9766
1336	chr3	54956398	54956612	215	Intron (ENST00000415676.6/55799, intron 28 of 38)	54918333	54967088	48756	57408	ENST00000493075.1	LRTM1	10476
1337	chr4	184201631	184204145	2515	5' UTR	184216562	184217702	1141	133121	ENST00000505644.1	ENPP6	13557
1338	chr2	219308547	219308935	389	Promoter (<=1kb)	219307018	219308923	1906	5798	ENST00000468454.1	PTPRN	0
1339	chr1	164769952	164775864	5913	Promoter (<=1kb)	164769116	164774641	5526	100505795	ENST00000421530.1	LOC100505795	0
1340	chr7	32990585	32994526	3942	Promoter (1-2kb)	32988586	33002928	14343	11328	ENST00000468510.5	FKBP9	1999
1341	chr12	89224429	89227606	3178	Intron (ENST00000549278.1/ENST00000549278.1, intron 1 of 3)	89349072	89351171	2100	1848	ENST00000547291.1	DUSP6	123565
1342	chr10	122861174	122862554	1381	Intron (ENST00000368898.7/196792, intron 1 of 3)	122832149	122850793	18645	100533195	ENST00000368904.5	FAM24B-CUZD1	-10381
1343	chrX	139213071	139214292	1222	Intron (ENST00000448673.1/2258, intron 1 of 3)	138632678	139205023	572346	2258	ENST00000626909.2	FGF13	-8048
1344	chr3	177665058	177668552	3495	Intron (ENST00000442937.5/100505566, intron 3 of 3)	177676710	177752132	75423	100505566	ENST00000446548.1	LINC00578	-8158
1345	chr4	88277245	88277459	215	Promoter (<=1kb)	88268750	88277567	8818	152926	ENST00000511506.1	PPM1K	108
1346	chr7	82698408	82701059	2652	Distal Intergenic	82801537	82822590	21054	27445	ENST00000432078.2	PCLO	121531
1347	chr17	21260330	21261222	893	Exon (ENST00000585002.1/ENST00000585002.1, exon 1 of 2)	21238870	21253410	14541	256302	ENST00000611551.1	NATD1	-6920
1348	chr14	32012835	32013049	215	Intron (ENST00000556949.1/ENST00000556949.1, intron 1 of 1)	32076114	32090780	14667	394	ENST00000555814.1	ARHGAP5	-63065
1349	chr3	98165735	98165949	215	Distal Intergenic	98149326	98150405	1080	403273	ENST00000437310.1	OR5H14	16409
1350	chr2	197871038	197872727	1690	Intron (ENST00000428675.5/5334, intron 1 of 5)	197810258	198146932	336675	5334	ENST00000487695.6	PLCL1	60780
1351	chr11	104258354	104258962	609	Distal Intergenic	103907189	104164379	257191	80310	ENST00000302251.9	PDGFD	-93975
1352	chr2	107877690	107877957	268	Intron (ENST00000408999.3/285190, intron 20 of 22)	107826937	107890841	63905	285190	ENST00000408999.3	RGPD4	50753
1353	chr6	30954944	30956683	1740	Promoter (<=1kb)	30931362	30955636	24275	389376	ENST00000634371.1	SFTA2	0
1354	chr4	87656822	87661682	4861	Exon (ENST00000282479.7/1758, exon 3 of 5)	87650307	87664361	14055	1758	ENST00000339673.10	DMP1	6515
1355	chr1	147868646	147869670	1025	Distal Intergenic	147928393	147993339	64947	51463	ENST00000314163.11	GPR89B	-58723
1356	chr3	169241264	169241478	215	Intron (ENST00000494292.5/2122, intron 2 of 15)	169128024	169269238	141215	2122	ENST00000481315.1	MECOM	27760
1357	chr4	111269217	111270114	898	Distal Intergenic	110860582	110860647	66	100126354	ENST00000401142.1	MIR297	-408570
1358	chr4	183599275	183599840	566	Distal Intergenic	183651280	183656096	4817	201965	ENST00000506467.1	RWDD4	56256
1359	chr2	113876785	113878907	2123	Distal Intergenic	113889960	113962596	72637	10096	ENST00000263238.6	ACTR3	-11053
1360	chr2	191564731	191568373	3643	Distal Intergenic	191678068	191682487	4420	64859	ENST00000491331.5	NABP1	-109695
1361	chr10	121575366	121575667	302	Intron (ENST00000369061.8/2263, intron 1 of 14)	121564324	121565911	1588	2263	ENST00000491475.1	FGFR2	-9455
1362	chr11	7913160	7913374	215	Distal Intergenic	7850751	7905955	55205	283299	ENST00000527847.5	LOC283299	-7205
1363	chr13	28425657	28426789	1133	Intron (ENST00000282397.8/2321, intron 10 of 29)	28385548	28495079	109532	2321	ENST00000615840.4	FLT1	68290
1364	chr3	9194136	9194350	215	Promoter (1-2kb)	9192535	9194453	1919	101927416	ENST00000450920.1	SRGAP3-AS2	1601
1365	chr2	163121212	163122684	1473	Distal Intergenic	162423247	162838730	415484	90134	ENST00000328032.8	KCNH7	-282482
1366	chr3	182388841	182389477	637	Distal Intergenic	182446970	182486364	39395	401103	ENST00000496220.1	LINC01994	96887
1367	chr12	38930511	38932383	1873	Distal Intergenic	38653834	38907430	253597	144402	ENST00000360449.3	CPNE8	-23081
1368	chr20	51700545	51706075	5531	Intron (ENST00000311637.9/10079, intron 4 of 22)	51725819	51732587	6769	10079	ENST00000477492.1	ATP9A	26512
1369	chr6	113762262	113765053	2792	Distal Intergenic	113857362	113863471	6110	4082	ENST00000612661.1	MARCKS	-92309
1370	chr1	181778516	181778916	401	Promoter (2-3kb)	181776101	181783784	7684	777	ENST00000644521.1	CACNA1E	2415
1371	chr1	186567991	186568205	215	Distal Intergenic	186443566	186461122	17557	5132	ENST00000391997.2	PDC	-106869
1372	chr3	14030990	14032044	1055	Intron (ENST00000532880.6/348825, intron 3 of 4)	14019700	14064625	44926	348825	ENST00000532924.5	TPRXL	11290
1373	chr15	79736594	79737772	1179	Distal Intergenic	79889092	79896997	7906	10588	ENST00000560919.5	MTHFS	159225
1374	chr10	73600442	73602886	2445	Intron (ENST00000339859.8/159195, intron 1 of 22)	73575810	73591540	15731	159195	ENST00000498213.1	USP54	-8902
1375	chr17	30996249	30996751	503	Intron (ENST00000328381.9/84282, intron 3 of 4)	30988077	30997528	9452	84282	ENST00000434242.2	RNF135	8172
1376	chr17	41379811	41380079	269	Promoter (2-3kb)	41377650	41382403	4754	3885	ENST00000394001.1	KRT34	2324
1377	chrX	27987162	27988959	1798	Distal Intergenic	27977993	27981449	3457	139425	ENST00000441525.3	DCAF8L1	-5713
1378	chr5	64406165	64406432	268	Intron (ENST00000438016.2/ENST00000438016.2, intron 4 of 4)	64506257	64575904	69648	401190	ENST00000508162.1	RGS7BP	-99825
1379	chr12	41702506	41703109	604	Distal Intergenic	41764189	41765581	1393	101927038	ENST00000552712.1	LINC02400	-61080
1380	chr14	44437893	44440011	2119	Distal Intergenic	44504342	44507279	2938	84075	ENST00000340446.4	FSCB	67268
1381	chr6	22953688	22957283	3596	Intron (ENST00000420572.2/ENST00000420572.2, intron 2 of 2)	22569493	22571666	2174	154150	ENST00000510882.3	HDGFL1	384195
1382	chr7	3455547	3455880	334	Intron (ENST00000404826.6/221935, intron 1 of 44)	3301587	4269000	967414	221935	ENST00000615806.4	SDK1	153960
1383	chr3	130770999	130771267	269	Distal Intergenic	130678935	130746829	67895	30849	ENST00000356763.7	PIK3R4	-24170
1384	chr1	223780182	223782545	2364	3' UTR	223770623	223776018	5396	824	ENST00000463997.1	CAPN2	9559
1385	chr5	38622858	38623153	296	Intron (ENST00000500817.2/100506495, intron 2 of 8)	38594971	38608354	13384	3977	ENST00000507786.1	LIFR	-14504
1386	chr14	105091449	105094745	3297	Promoter (<=1kb)	105093609	105095699	2091	102723354	ENST00000548104.1	LINC02298	0
1387	chr13	51858512	51859518	1007	Promoter (2-3kb)	51861981	51866232	4252	83446	ENST00000242819.5	CCDC70	-2463
1388	chr8	29398961	29399709	749	Distal Intergenic	29333064	29350668	17605	1846	ENST00000240100.6	DUSP4	-48293
1389	chr7	115825286	115827684	2399	Distal Intergenic	115939949	115950894	10946	22797	ENST00000462828.1	TFEC	123210
1390	chr5	6081968	6083252	1285	Distal Intergenic	6310441	6337292	26852	401172	ENST00000507444.1	LINC02145	254040
1391	chr22	42687641	42689801	2161	Downstream (2-3kb)	42692121	42694986	2866	53947	ENST00000401850.5	A4GALT	5185
1392	chrX	22951792	22952777	986	Intron (ENST00000608254.1/100873065, intron 3 of 5)	22999961	23003589	3629	168400	ENST00000327968.6	DDX53	-47184
1393	chr11	45045938	45046966	1029	Distal Intergenic	45095806	45224908	129103	56981	ENST00000530656.5	PRDM11	-48840
1394	chr8	36630394	36631433	1040	Intron (ENST00000524132.5/ENST00000524132.5, intron 4 of 4)	36784324	36814400	30077	157855	ENST00000523973.5	KCNU1	-152891
1395	chr10	125707302	125709406	2105	Promoter (<=1kb)	125700437	125707549	7113	399821	ENST00000419400.1	EDRF1-DT	0
1396	chr6	26233482	26235955	2474	Promoter (<=1kb)	26234268	26234933	666	3007	ENST00000244534.6	HIST1H1D	0
1397	chr10	8360786	8361000	215	Distal Intergenic	8259331	8268305	8975	100507143	ENST00000428165.1	LINC00708	-92481
1398	chr17	63355435	63358050	2616	Promoter (<=1kb)	63355055	63391757	36703	26115	ENST00000583545.1	TANC2	380
1399	chr13	33734184	33736304	2121	Distal Intergenic	33355206	33676768	321563	90627	ENST00000454681.2	STARD13	-57416
1400	chr18	72472528	72473719	1192	Distal Intergenic	72536684	72540298	3615	147381	ENST00000581425.1	CBLN2	66579
1401	chrX	20393626	20398922	5297	Distal Intergenic	20154590	20267519	112930	6197	ENST00000643402.1	RPS6KA3	-126107
1402	chr1	176857267	176857556	290	3' UTR	176791445	176836802	45358	60676	ENST00000479836.1	PAPPA2	65822
1403	chrX	89586072	89586286	215	Distal Intergenic	89921882	89922883	1002	90316	ENST00000283891.5	TGIF2LX	-335596
1404	chr20	32709013	32710414	1402	Intron (ENST00000642484.1/284805, intron 3 of 9)	32704474	32743406	38933	149951	ENST00000474815.2	COMMD7	32992
1405	chr9	26685753	26686171	419	Distal Intergenic	26869926	26887478	17553	79886	ENST00000517946.1	CAAP1	201307
1406	chr20	23751388	23751655	268	Promoter (<=1kb)	23747731	23751268	3538	1469	ENST00000398402.1	CST1	-120
1407	chr4	173167586	173170518	2933	Promoter (<=1kb)	173131928	173169652	37725	101930370	ENST00000500914.6	LOC101930370	0
1408	chr18	11849815	11863494	13680	Promoter (<=1kb)	11857440	11881172	23733	2774	ENST00000602628.1	GNAL	0
1409	chr3	29941138	29941352	215	Intron (ENST00000636680.1/27303, intron 13 of 16)	29926811	29934156	7346	100873977	ENST00000414547.1	RBMS3-AS1	-6982
1410	chr4	12393247	12394846	1600	Distal Intergenic	12223482	12251286	27805	101929019	ENST00000505386.1	LINC02270	169765
1411	chr2	47302997	47304841	1845	Intron (ENST00000448713.5/101927043, intron 2 of 2)	47335315	47335514	200	618	ENST00000418539.2	BCYRN1	-30474
1412	chrX	114059319	114059770	452	Promoter (<=1kb)	113616300	114059121	442822	105463123	ENST00000468762.3	XACT	-198
1413	chr2	217682715	217689060	6346	Intron (ENST00000486365.5/729582, intron 1 of 10)	217703900	217756555	52656	729582	ENST00000423123.1	DIRC3	67495
1414	chr16	2687151	2687438	288	Promoter (1-2kb)	2685614	2696032	10419	54442	ENST00000569689.1	KCTD5	1537
1415	chr13	29593561	29596092	2532	Promoter (<=1kb)	29509410	29595688	86279	6541	ENST00000380752.9	SLC7A1	0
1416	chr15	44913156	44913823	668	Distal Intergenic	44825747	44884694	58948	653381	ENST00000561384.3	SORD2P	-28462
1417	chr2	172208231	172208507	277	Distal Intergenic	172103006	172109982	6977	104326193	ENST00000448117.1	DLX2-DT	105225
1418	chr12	76309755	76313035	3281	Distal Intergenic	76344506	76348415	3910	79738	ENST00000650064.1	BBS10	35380
1419	chr1	240122628	240123557	930	5' UTR	240091880	240475189	383310	56776	ENST00000319653.13	FMN2	30748
1420	chr10	17035617	17036013	397	Intron (ENST00000377833.9/8029, intron 27 of 66)	16965640	16984195	18556	8029	ENST00000438254.1	CUBN	-51422
1421	chr1	66132615	66133008	394	Intron (ENST00000329654.8/5142, intron 3 of 16)	66152390	66332590	180201	5142	ENST00000412480.6	PDE4B	-19382
1422	chr2	168808503	168809649	1147	Promoter (1-2kb)	168811334	168851182	39849	115677	ENST00000447264.2	NOSTRIN	-1685
1423	chr15	98805490	98805829	340	Intron (ENST00000649865.1/3480, intron 2 of 20)	98820866	98896919	76054	3480	ENST00000560186.5	IGF1R	-15037
1424	chr20	4457081	4459565	2485	Distal Intergenic	4220631	4249074	28444	146	ENST00000379453.5	ADRA1D	-208007
1425	chrX	133646561	133646899	339	Intron (ENST00000370818.7/2719, intron 6 of 7)	133596366	133753702	157337	2719	ENST00000406757.2	GPC3	106803
1426	chr10	26081498	26081826	329	Intron (ENST00000642920.1/53904, intron 14 of 34)	26165842	26168839	2998	53904	ENST00000477691.2	MYO3A	-84016
1427	chrX	14055934	14056946	1013	Distal Intergenic	14008673	14029893	21221	54960	ENST00000398355.7	GEMIN8	-26041
1428	chr9	88486918	88487187	270	Distal Intergenic	88534033	88544978	10946	158046	ENST00000649870.1	NXNL2	-46846
1429	chr1	6223758	6226121	2364	3' UTR	6234692	6239408	4717	148645	ENST00000650463.1	LINC00337	-8571
1430	chr12	82014759	82016771	2013	Distal Intergenic	81953719	81993133	39415	101928449	ENST00000550506.1	LINC02426	61040
1431	chr4	25448800	25450578	1779	Distal Intergenic	25415152	25418497	3346	29945	ENST00000506973.1	ANAPC4	33648
1432	chr1	240441948	240442401	454	Intron (ENST00000319653.13/56776, intron 16 of 17)	240457482	240474267	16786	56776	ENST00000543681.1	FMN2	-15081
1433	chr19	55283938	55285294	1357	Promoter (<=1kb)	55284166	55312533	28368	84446	ENST00000309383.5	BRSK1	0
1434	chr10	69315354	69320343	4990	Promoter (<=1kb)	69315785	69401443	85659	3098	ENST00000298649.8	HK1	0
1435	chr11	59730673	59733578	2906	Intron (ENST00000641815.1/6809, intron 2 of 11)	59748811	59749574	764	81343	ENST00000525296.1	OR10V2P	-15233
1436	chr12	43332960	43333174	215	Distal Intergenic	43422819	43439712	16894	80070	ENST00000549670.5	ADAMTS20	106538
1437	chr1	227946089	227946359	271	Promoter (1-2kb)	227918656	227947898	29243	7483	ENST00000272164.5	WNT9A	1539
1438	chr5	65886189	65886500	312	Distal Intergenic	65926475	66082549	156075	55914	ENST00000284037.9	ERBIN	-39975
1439	chrX	73125535	73126366	832	Promoter (1-2kb)	73126514	73127735	1222	645996	ENST00000641404.1	NAP1L6	1369
1440	chr2	160292057	160295127	3071	Intron (ENST00000474820.5/5937, intron 7 of 15)	160274518	160284867	10350	5937	ENST00000490637.5	RBMS1	-7190
1441	chr7	24824626	24827667	3042	Intron (ENST00000313367.6/26031, intron 16 of 22)	24800029	24815093	15065	26031	ENST00000487020.5	OSBPL3	-9533
1442	chr11	28621381	28621774	394	Distal Intergenic	28477481	28477548	68	102466876	ENST00000618032.1	MIR8068	-143833
1443	chr5	6516875	6517089	215	Distal Intergenic	6582136	6583723	1588	255167	ENST00000507628.1	LINC01018	-65047
1444	chr3	8868405	8873164	4760	Intron (ENST00000427329.5/56852, intron 3 of 3)	8890109	8902398	12290	56852	ENST00000429790.1	RAD18	29234
1445	chr3	155026640	155027892	1253	Promoter (2-3kb)	155024124	155180849	156726	4311	ENST00000492661.5	MME	2516
1446	chr8	37595945	37601822	5878	Exon (ENST00000519691.1/ENST00000519691.1, exon 1 of 1)	37450763	37554183	103421	100507420	ENST00000519738.5	LINC01605	-41762
1447	chr18	48529441	48530798	1358	Distal Intergenic	48539046	48863217	324172	9811	ENST00000256413.7	CTIF	-8248
1448	chr15	80485180	80486168	989	Intron (ENST00000303329.8/9915, intron 5 of 18)	80470243	80488735	18493	9915	ENST00000531595.3	ARNT2	14937
1449	chr18	67117640	67119359	1720	Distal Intergenic	67081584	67081686	103	100847002	ENST00000578054.1	MIR5011	36056
1450	chr6	2576580	2577068	489	Distal Intergenic	2617144	2637455	20312	105374885	ENST00000649361.1	LINC02521	-40076
1451	chr10	71878005	71878876	872	Exon (ENST00000441348.1/ENST00000441348.1, exon 1 of 2)	71816298	71851375	35078	5660	ENST00000394936.7	PSAP	-26630
1452	chr8	81122002	81124067	2066	Distal Intergenic	80967810	81112068	144259	55824	ENST00000220597.4	PAG1	-9934
1453	chr2	110663197	110663473	277	Intron (ENST00000535254.5/699, intron 8 of 23)	110661356	110667565	6210	699	ENST00000477481.1	BUB1	4092
1454	chr18	58159738	58161886	2149	Intron (ENST00000356462.10/23327, intron 1 of 28)	58149337	58396573	247237	23327	ENST00000586263.5	NEDD4L	10401
1455	chr22	47109279	47109616	338	Intron (ENST00000380995.5/25771, intron 12 of 13)	46914092	46916042	1951	642757	ENST00000640274.1	TBC1D22A-AS1	-193237
1456	chr1	218492340	218500663	8324	Distal Intergenic	218510096	218525978	15883	440714	ENST00000443836.5	C1orf143	-9433
1457	chr4	110907972	110909100	1129	Distal Intergenic	110860582	110860647	66	100126354	ENST00000401142.1	MIR297	-47325
1458	chr11	18578688	18580442	1755	Promoter (<=1kb)	18531698	18579518	47821	55293	ENST00000535484.5	UEVLD	0
1459	chr19	37312899	37313226	328	Promoter (<=1kb)	37312878	37317142	4265	284459	ENST00000587570.1	ZNF875	21
1460	chr3	137687285	137687499	215	Distal Intergenic	137764284	137766338	2055	8403	ENST00000306087.2	SOX14	-76785
1461	chr4	138218440	138219155	716	Intron (ENST00000280612.9/23657, intron 5 of 11)	138171844	138223244	51401	23657	ENST00000509248.1	SLC7A11	4089
1462	chr15	24856121	24863795	7675	Promoter (<=1kb)	24856551	24978582	122032	6638	ENST00000400097.5	SNRPN	0
1463	chr7	65793215	65796168	2954	Intron (ENST00000414608.1/ENST00000414608.1, intron 6 of 6)	65647010	65770810	123801	441242	ENST00000633579.1	LOC441242	-22405
1464	chr15	87369676	87369890	215	Distal Intergenic	87576929	87579866	2938	145978	ENST00000560153.2	LINC00052	-207039
1465	chr12	3158170	3160317	2148	Intron (ENST00000537971.5/10867, intron 1 of 7)	3199984	3278612	78629	10867	ENST00000640568.1	TSPAN9	-39667
1466	chr5	16982411	16984333	1923	Distal Intergenic	16661914	16936276	274363	4651	ENST00000274203.13	MYO10	-46135
1467	chr2	236389244	236389630	387	Intron (ENST00000431676.6/79781, intron 11 of 18)	236380613	236412891	32279	79781	ENST00000467572.5	IQCA1	23261
1468	chr10	92283751	92285504	1754	Intron (ENST00000265997.4/22849, intron 1 of 9)	92049631	92291087	241457	22849	ENST00000265997.4	CPEB3	5583
1469	chr1	247937246	247937460	215	Exon (ENST00000427566.2/ENST00000427566.2, exon 1 of 1)	247948858	247949796	939	391190	ENST00000623922.1	OR2L8	-11398
1470	chr13	79776099	79777744	1646	Distal Intergenic	79804418	79805685	1268	102724076	ENST00000457858.1	LINC01038	-26674
1471	chr20	11451992	11452206	215	Distal Intergenic	11234170	11301525	67356	339593	ENST00000444792.1	LOC339593	-150467
1472	chr17	59451954	59453031	1078	Exon (ENST00000577478.2/101927728, exon 3 of 7)	59388840	59397149	8310	388403	ENST00000582813.1	YPEL2	63114
1473	chr10	68594085	68595230	1146	Intron (ENST00000373644.4/80312, intron 2 of 11)	68560656	68694482	133827	80312	ENST00000373644.4	TET1	33429
1474	chr10	77415528	77417690	2163	Intron (ENST00000639601.1/3778, intron 1 of 27)	76884878	77404025	519148	3778	ENST00000406533.7	KCNMA1	-11503
1475	chr5	1936040	1936254	215	Intron (ENST00000511693.1/ENST00000511693.1, intron 1 of 1)	1887332	1900493	13162	101929081	ENST00000514569.1	CTD-2194D22.4	48708
1476	chr7	138329704	138329918	215	Distal Intergenic	138460334	138589993	129660	8805	ENST00000343526.8	TRIM24	-130416
1477	chr7	144841984	144843790	1807	Distal Intergenic	144591424	144836395	244972	27010	ENST00000552881.1	TPK1	-5589
1478	chr3	45373862	45374247	386	Distal Intergenic	45388506	45548837	160332	23395	ENST00000265537.7	LARS2	-14259
1479	chr4	55436916	55439983	3068	Exon (ENST00000309964.8/9575, exon 21 of 22)	55442278	55443755	1478	9575	ENST00000479384.1	CLOCK	3772
1480	chr10	36455230	36456648	1419	Distal Intergenic	37125788	37232567	106780	91074	ENST00000611781.4	ANKRD30A	-669140
1481	chr8	82206180	82207390	1211	Distal Intergenic	81823792	81842866	19075	64089	ENST00000521810.5	SNX16	-363314
1482	chr3	104960788	104961432	645	Distal Intergenic	105366909	105576900	209992	214	ENST00000306107.9	ALCAM	-405477
1483	chr12	117968598	117969855	1258	Promoter (<=1kb)	117453054	117968983	515930	283455	ENST00000339824.6	KSR2	0
1484	chr14	34495524	34499082	3559	Distal Intergenic	34432789	34462356	29568	171546	ENST00000298130.4	SPTSSA	-33168
1485	chr1	6475012	6478301	3290	Promoter (<=1kb)	6466092	6477588	11497	57449	ENST00000489097.5	PLEKHG5	0
1486	chr9	103804832	103805046	215	Distal Intergenic	103999755	104000469	715	101928523	ENST00000647310.1	LOC101928523	-194709
1487	chr1	145016675	145018148	1474	Intron (ENST00000612199.4/647135, intron 2 of 9)	144897236	144955446	58211	647135	ENST00000621582.1	SRGAP2B	-61229
1488	chr20	50641520	50647961	6442	Promoter (<=1kb)	50645471	50660291	14821	100506175	ENST00000452336.1	LOC100506175	0
1489	chr2	147818662	147818929	268	Distal Intergenic	147844517	147896447	51931	92	ENST00000487959.5	ACVR2A	-25588
1490	chr6	55729471	55730182	712	Distal Intergenic	55753645	55875564	121920	653	ENST00000370830.3	BMP5	145382
1491	chr19	47553740	47553954	215	Promoter (1-2kb)	47520685	47555856	35172	84215	ENST00000391901.7	ZNF541	1902
1492	chr13	70849178	70849392	215	Distal Intergenic	71015141	71168417	153277	100885781	ENST00000428761.1	LINC00348	-165749
1493	chr13	110123072	110123286	215	Exon (ENST00000623716.1/ENST00000623716.1, exon 1 of 1)	110161018	110163490	2473	1282	ENST00000467182.1	COL4A1	40204
1494	chr10	93547110	93552064	4955	Distal Intergenic	93566665	93590072	23408	338557	ENST00000371481.8	FFAR4	-14601
1495	chr12	109649211	109650048	838	Distal Intergenic	109587861	109597262	9402	4598	ENST00000540353.1	MVK	61350
1496	chr1	93637678	93639451	1774	Intron (ENST00000260502.10/8412, intron 3 of 11)	93592306	93648822	56517	8412	ENST00000479503.2	BCAR3	9371
1497	chr6	19025975	19026847	873	Distal Intergenic	18571784	18571880	97	693125	ENST00000385041.1	MIR548A1	454191
1498	chr6	163571821	163572632	812	3' UTR	163566458	163571452	4995	9444	ENST00000541696.1	QKI	5363
1499	chr8	100787975	100790829	2855	Distal Intergenic	100718249	100722762	4514	26986	ENST00000522720.1	PABPC1	-65213
1500	chr11	130580746	130581117	372	Distal Intergenic	130666735	130666803	69	102466873	ENST00000615217.1	MIR8052	-85618
1501	chr6	45958918	45960547	1630	Intron (ENST00000644878.1/53405, intron 1 of 5)	45880907	45937601	56695	53405	ENST00000643162.1	CLIC5	-21317
1502	chr19	17291904	17292951	1048	Promoter (<=1kb)	17292609	17306655	14047	64981	ENST00000595444.1	MRPL34	0
1503	chr8	120315398	120315787	390	Exon (ENST00000309791.8/7373, exon 39 of 48)	120345446	120371081	25636	7373	ENST00000440844.5	COL14A1	-29659
1504	chr2	73939730	73939999	270	Intron (ENST00000629438.2/1716, intron 1 of 5)	73926908	73947053	20146	1716	ENST00000493055.1	DGUOK	12822
1505	chr11	28565968	28567374	1407	Distal Intergenic	28477481	28477548	68	102466876	ENST00000618032.1	MIR8068	-88420
1506	chr20	16406907	16407915	1009	Promoter (2-3kb)	16379750	16404867	25118	55614	ENST00000450176.1	KIF16B	-2040
1507	chr6	48109425	48111985	2561	Distal Intergenic	47878028	48068689	190662	442213	ENST00000339488.8	PTCHD4	-40736
1508	chr4	187479094	187479506	413	Distal Intergenic	187532882	187555904	23023	100506272	ENST00000514767.1	LINC02492	76398
1509	chr5	111582589	111583075	487	Intron (ENST00000500779.2/100505678, intron 1 of 6)	111500147	111512590	12444	134429	ENST00000502322.5	STARD4	-69999
1510	chr4	180932145	180933919	1775	Distal Intergenic	181064089	181159149	95061	728081	ENST00000512487.1	LINC00290	225230
1511	chr1	185441359	185441686	328	Distal Intergenic	185331257	185335039	3783	100288079	ENST00000565520.1	GS1-279B7.1	-106320
1512	chr13	106522755	106524037	1283	Intron (ENST00000245323.4/1948, intron 1 of 4)	106489810	106516447	26638	1948	ENST00000643990.1	EFNB2	-6308
1513	chr3	186095926	186096140	215	Intron (ENST00000306376.9/2119, intron 5 of 12)	186104926	186105490	565	2119	ENST00000475484.1	ETV5	9350
1514	chr3	84291854	84292784	931	Distal Intergenic	84638406	84869575	231170	440970	ENST00000484892.5	LINC00971	576791
1515	chrX	118006591	118006861	271	Intron (ENST00000371882.5/90293, intron 1 of 6)	117898572	117985320	86749	90293	ENST00000469946.5	KLHL13	-21271
1516	chr3	106140159	106141353	1195	Distal Intergenic	105776522	105869552	93031	868	ENST00000443752.2	CBLB	-270607
1517	chr7	112421788	112424861	3074	Promoter (<=1kb)	112422968	112450780	27813	3475	ENST00000432734.1	IFRD1	0
1518	chr4	188442286	188442739	454	Intron (ENST00000512839.5/401164, intron 2 of 4)	188455578	188538552	82975	401164	ENST00000510832.5	LINC01060	-12839
1519	chr4	61767933	61769064	1132	Intron (ENST00000512091.6/23284, intron 7 of 25)	61895741	62072437	176697	23284	ENST00000502815.1	ADGRL3	-126677
1520	chr1	22003139	22005317	2179	Promoter (<=1kb)	22005305	22030617	25313	29092	ENST00000648697.1	LINC00339	0
1521	chrX	107154967	107155301	335	Promoter (<=1kb)	107124148	107154234	30087	54830	ENST00000432145.5	NUP62CL	-733
1522	chr6	22940984	22941417	434	Intron (ENST00000420572.2/ENST00000420572.2, intron 2 of 2)	22569493	22571666	2174	154150	ENST00000510882.3	HDGFL1	371491
1523	chr1	242243435	242243649	215	Intron (ENST00000536534.6/200150, intron 4 of 9)	242235462	242265433	29972	200150	ENST00000474177.1	PLD5	21784
1524	chr1	248631097	248632398	1302	Intron (ENST00000641193.1/ENST00000641193.1, intron 1 of 1)	248626119	248627190	1072	127077	ENST00000625105.2	OR2T11	-3907
1525	chr11	92499736	92501537	1802	Intron (ENST00000409404.6/120114, intron 1 of 24)	92355186	92524949	169764	120114	ENST00000528921.1	FAT3	144550
1526	chr11	66123853	66127922	4070	Intron (ENST00000527224.1/55690, intron 1 of 6)	66100763	66216250	115488	55690	ENST00000527380.1	PACS1	23090
1527	chr5	16757767	16758154	388	Promoter (<=1kb)	16704579	16758226	53648	4651	ENST00000510401.6	MYO10	72
1528	chr10	108396635	108396918	284	Distal Intergenic	108040381	108197849	157469	103695365	ENST00000629275.2	LINC01435	-198786
1529	chr2	123655830	123656478	649	Distal Intergenic	124016858	124025173	8316	107985820	ENST00000438816.1	LOC107985820	368695
1530	chr15	56735429	56739826	4398	Promoter (1-2kb)	56630181	56734086	103906	54816	ENST00000559237.5	ZNF280D	-1343
1531	chr2	213411681	213411966	286	Intron (ENST00000331683.9/79582, intron 9 of 15)	213489963	214410318	920356	79582	ENST00000451561.1	SPAG16	-77997
1532	chr20	37142112	37143429	1318	Intron (ENST00000417458.5/140699, intron 4 of 16)	37101226	37158904	57679	140699	ENST00000417458.5	MROH8	15475
1533	chr1	9928374	9937506	9133	Promoter (<=1kb)	9922113	9935620	13508	84328	ENST00000488540.5	LZIC	0
1534	chr4	46389498	46390562	1065	Promoter (<=1kb)	46249343	46389928	140586	2555	ENST00000381620.8	GABRA2	0
1535	chr1	245606560	245606774	215	Intron (ENST00000407071.6/55083, intron 6 of 14)	245646092	245687314	41223	55083	ENST00000483253.1	KIF26B	-39318
1536	chr7	142893402	142893723	322	Distal Intergenic	142871203	142885762	14560	55503	ENST00000359396.7	TRPV6	-7640
1537	chr1	245384918	245387617	2700	Intron (ENST00000407071.6/55083, intron 3 of 14)	245353678	245371717	18040	55083	ENST00000479506.1	KIF26B	31240
1538	chrX	47285191	47286486	1296	Distal Intergenic	47247082	47247952	871	8237	ENST00000467378.1	USP11	38109
1539	chr6	137978061	137978336	276	Distal Intergenic	137943079	137945802	2724	105378020	ENST00000417932.1	LINC02528	-32259
1540	chr9	3905923	3907902	1980	Intron (ENST00000324333.14/169792, intron 5 of 9)	3898642	3901248	2607	84850	ENST00000451340.2	GLIS3-AS1	7281
1541	chr4	110792647	110794395	1749	Distal Intergenic	110860582	110860647	66	100126354	ENST00000401142.1	MIR297	66252
1542	chr7	76234888	76235157	270	Promoter (<=1kb)	76234982	76260034	25053	222183	ENST00000479294.2	SRRM3	0
1543	chr6	167134605	167134926	322	Intron (ENST00000609590.1/1235, intron 10 of 12)	167122771	167138946	16176	1235	ENST00000349984.6	CCR6	11834
1544	chrX	42053933	42055495	1563	Exon (ENST00000437466.1/ENST00000437466.1, exon 1 of 2)	41519554	41923645	404092	8573	ENST00000378154.2	CASK	-130288
1545	chr1	247496476	247496801	326	Distal Intergenic	247491128	247492090	963	441932	ENST00000366492.1	OR2W5	5348
1546	chrX	30117455	30118687	1233	Distal Intergenic	30215560	30220089	4530	4113	ENST00000378988.4	MAGEB2	-96873
1547	chr5	65199020	65200002	983	Promoter (<=1kb)	65151528	65198765	47238	11174	ENST00000314351.9	ADAMTS6	-255
1548	chr10	84269271	84269619	349	Distal Intergenic	84279980	84294659	14680	170425	ENST00000415469.5	LINC00858	-10361
1549	chr4	61921201	61924411	3211	Intron (ENST00000512091.6/23284, intron 12 of 25)	61933843	61947077	13235	23284	ENST00000508078.1	ADGRL3	-9432
1550	chr5	157128687	157129741	1055	Intron (ENST00000524219.1/84868, intron 1 of 4)	157138442	157142775	4334	9443	ENST00000420343.1	MED7	13034
1551	chr3	147939787	147940647	861	Exon (ENST00000467198.1/ENST00000467198.1, exon 1 of 2)	148078159	148088029	9871	100507461	ENST00000490465.1	LINC02032	-137512
1552	chr6	46169720	46171004	1285	Promoter (<=1kb)	46159187	46170971	11785	59084	ENST00000371383.6	ENPP5	0
1553	chr18	7669550	7669847	298	Intron (ENST00000580170.5/5797, intron 1 of 32)	7754973	8406856	651884	5797	ENST00000400053.8	PTPRM	-85126
1554	chr4	157573235	157573672	438	Promoter (<=1kb)	157572536	157575824	3289	340017	ENST00000509450.1	LINC02433	699
1555	chrX	132821743	132823341	1599	Intron (ENST00000370836.6/90161, intron 3 of 3)	132628852	132957277	328426	90161	ENST00000640529.1	HS6ST2	133936
1556	chr5	17398703	17399150	448	Distal Intergenic	17404019	17441694	37676	101929544	ENST00000508677.1	LINC02217	-4869
1557	chr15	41580831	41581045	215	3' UTR	41571103	41573467	2365	7301	ENST00000559851.1	TYRO3	9728
1558	chr12	95755380	95756219	840	Intron (ENST00000343702.8/59277, intron 2 of 9)	95713297	95739995	26699	59277	ENST00000552603.1	NTN4	-15385
1559	chr7	5561545	5564173	2629	Promoter (<=1kb)	5528592	5563784	35193	60	ENST00000432588.5	ACTB	0
1560	chr20	3222405	3222866	462	Promoter (<=1kb)	3221753	3223870	2118	3704	ENST00000472295.1	ITPA	652
1561	chr14	78925169	78925444	276	Intron (ENST00000634499.1/9369, intron 9 of 19)	78698220	78709641	11422	9369	ENST00000557081.1	NRXN3	226949
1562	chr22	27239458	27240062	605	Distal Intergenic	27221349	27224727	3379	105372978	ENST00000444114.5	LINC01638	-14731
1563	chr19	45736348	45737787	1440	Intron (ENST00000457052.2/388553, intron 2 of 14)	45733251	45764534	31284	388553	ENST00000457052.2	BHMG1	3097
1564	chr17	80308198	80308937	740	Intron (ENST00000508628.6/57674, intron 14 of 68)	80295729	80298775	3047	57674	ENST00000574060.1	RNF213	12469
1565	chr5	78287690	78288701	1012	Intron (ENST00000255194.10/8546, intron 1 of 26)	78002326	78294692	292367	8546	ENST00000519295.5	AP3B1	5991
1566	chr5	119311740	119312007	268	Intron (ENST00000274456.6/25816, intron 1 of 1)	119333175	119393743	60569	25816	ENST00000513374.1	TNFAIP8	-21168
1567	chrX	48835114	48835553	440	Promoter (<=1kb)	48831094	48835633	4540	27344	ENST00000218230.5	PCSK1N	80
1568	chr7	53504802	53505016	215	Distal Intergenic	53655509	53811931	156423	401337	ENST00000380970.2	LINC01446	306915
1569	chr11	118717188	118721148	3961	Intron (ENST00000526274.2/ENST00000526274.2, intron 2 of 2)	118662731	118679690	16960	11181	ENST00000527558.1	TREH	-37498
1570	chr4	147718058	147718524	467	Distal Intergenic	147732063	147858488	126426	79658	ENST00000510379.1	ARHGAP10	-13539
1571	chr7	93719180	93719577	398	Promoter (2-3kb)	93716928	93717005	78	100616206	ENST00000583734.1	MIR4652	2252
1572	chr3	126781730	126783489	1760	Intron (ENST00000290913.7/84303, intron 4 of 7)	126730564	126960391	229828	84303	ENST00000513253.1	CHCHD6	51166
1573	chr10	99962833	99968704	5872	Intron (ENST00000324109.8/23268, intron 3 of 16)	99875577	99930996	55420	23268	ENST00000636706.1	DNMBP	-31837
1574	chr5	287289	289728	2440	Exon (ENST00000504656.1/ENST00000504656.1, exon 1 of 2)	304176	434857	130682	57491	ENST00000505113.5	AHRR	-14448
1575	chr4	83580972	83581859	888	Exon (ENST00000611707.4/84803, exon 4 of 13)	83588258	83595335	7078	84803	ENST00000513683.1	GPAT3	-6399
1576	chr19	34481171	34482996	1826	Promoter (<=1kb)	34481638	34512304	30667	126374	ENST00000590071.6	WTIP	0
1577	chr9	24877031	24878065	1035	Distal Intergenic	24543307	24545946	2640	100129669	ENST00000418122.1	IZUMO3	-331085
1578	chr6	148267785	148267999	215	Intron (ENST00000423268.1/ENST00000423268.1, intron 2 of 3)	148272304	148440694	168391	23328	ENST00000367469.5	SASH1	-4305
1579	chr1	153552079	153553038	960	Promoter (1-2kb)	153543621	153550136	6516	6275	ENST00000368714.1	S100A4	-1943
1580	chr9	100515317	100517247	1931	Exon (ENST00000502978.1/100526694, exon 5 of 10)	100473113	100577636	104524	8577	ENST00000374879.4	TMEFF1	42204
1581	chr1	18515536	18515911	376	Distal Intergenic	18480982	18486126	5145	127707	ENST00000400664.2	KLHDC7A	34554
1582	chr1	160943189	160944424	1236	Intron (ENST00000356006.3/101928372, intron 3 of 5)	160945094	160951012	5919	142683	ENST00000494442.1	ITLN2	6588
1583	chr4	148779359	148782898	3540	Distal Intergenic	148940949	148941777	829	105377480	ENST00000512989.1	LOC105377480	158879
1584	chrX	4708206	4712954	4749	Distal Intergenic	4627200	4633572	6373	101928201	ENST00000420725.1	LOC101928201	-74634
1585	chr7	44710908	44713411	2504	Distal Intergenic	44748581	44768694	20114	83637	ENST00000413916.5	ZMIZ2	-35170
1586	chr15	47719466	47719872	407	Promoter (<=1kb)	47718489	47774223	55735	80031	ENST00000389428.7	SEMA6D	977
1587	chr20	32202694	32208742	6049	Promoter (<=1kb)	32207880	32238667	30788	23509	ENST00000375749.7	POFUT1	0
1588	chr2	12965721	12966183	463	Downstream (<1kb)	13001664	13006997	5334	100506474	ENST00000421112.1	LOC100506474	40814
1589	chr7	12496946	12497530	585	Promoter (<=1kb)	12496429	12541910	45482	102725191	ENST00000418428.6	LOC102725191	517
1590	chr19	8592947	8593222	276	Promoter (<=1kb)	8589941	8593516	3576	81794	ENST00000603221.5	ADAMTS10	294
1591	chr6	106118489	106120944	2456	Intron (ENST00000636437.1/9474, intron 6 of 6)	106098940	106109939	11000	639	ENST00000369089.3	PRDM1	19549
1592	chr15	66364287	66366029	1743	Intron (ENST00000562124.5/54962, intron 1 of 7)	66336206	66356716	20511	54962	ENST00000261881.8	TIPIN	-7571
1593	chr8	32574354	32575926	1573	Intron (ENST00000518104.5/3084, intron 1 of 11)	32548727	32764471	215745	3084	ENST00000405005.7	NRG1	25627
1594	chr12	20633715	20634629	915	Exon (ENST00000359062.3/5139, exon 7 of 16)	20695355	20696975	1621	53919	ENST00000534996.5	SLCO1C1	-60726
1595	chr1	113209878	113210092	215	Distal Intergenic	113103201	113124997	21797	9860	ENST00000466161.1	LRIG2	106677
1596	chr1	172916633	172919458	2826	Intron (ENST00000432694.2/ENST00000432694.2, intron 1 of 4)	173039960	173050963	11004	8995	ENST00000404377.3	TNFSF18	131505
1597	chr11	60718385	60719484	1100	Distal Intergenic	60729304	60744212	14909	728588	ENST00000529108.5	MS4A18	-9820
1598	chr3	183978898	183989647	10750	Promoter (<=1kb)	183977518	183983576	6059	10057	ENST00000492216.1	ABCC5	0
1599	chr4	150977084	150977298	215	Intron (ENST00000510413.5/987, intron 2 of 56)	150264531	151015267	750737	987	ENST00000510413.5	LRBA	37969
1600	chr8	101538102	101538316	215	Intron (ENST00000251808.7/79977, intron 1 of 15)	101492758	101666893	174136	79977	ENST00000395927.1	GRHL2	45344
1601	chr9	12515895	12518624	2730	Distal Intergenic	12685439	12694303	8865	7306	ENST00000473763.1	TYRP1	-166815
1602	chr3	190152060	190152458	399	Distal Intergenic	189956831	190122437	165607	55214	ENST00000427335.6	P3H2	-29623
1603	chr1	40313382	40313596	215	Promoter (1-2kb)	40310111	40315438	5328	1298	ENST00000488463.6	COL9A2	1842
1604	chr10	7392529	7394128	1600	Intron (ENST00000361972.8/57713, intron 1 of 20)	7348142	7408745	60604	57713	ENST00000379711.2	SFMBT2	14617
1605	chr11	102374621	102375566	946	Intron (ENST00000530675.5/329, intron 6 of 8)	102362742	102377597	14856	329	ENST00000534130.1	BIRC2	11879
1606	chr5	158057901	158059189	1289	Distal Intergenic	157786289	157859175	72887	9685	ENST00000411809.6	CLINT1	-198726
1607	chr4	75089090	75089420	331	Distal Intergenic	75081702	75084717	3016	105377283	ENST00000561705.1	LINC02562	-4373
1608	chr13	114247615	114248120	506	Promoter (1-2kb)	114245743	114247237	1495	8881	ENST00000494581.1	CDC16	1872
1609	chr5	149995771	149997176	1406	Promoter (2-3kb)	150000046	150053142	53097	22993	ENST00000613459.4	HMGXB3	-2870
1610	chr14	85591057	85591435	379	Intron (ENST00000330753.5/23768, intron 1 of 1)	85560863	85562743	1881	23768	ENST00000553627.1	FLRT2	30194
1611	chr2	16475921	16476515	595	Distal Intergenic	16560657	16561482	826	81553	ENST00000469507.1	FAM49A	84967
1612	chr2	5749249	5749463	215	Distal Intergenic	5692667	5701385	8719	6664	ENST00000322002.4	SOX11	56582
1613	chr20	38558421	38559031	611	Exon (ENST00000397042.7/57148, exon 23 of 30)	38568467	38578065	9599	57148	ENST00000461147.1	RALGAPB	-9436
1614	chr1	10900315	10902215	1901	Distal Intergenic	10946475	10947870	1396	148345	ENST00000468348.1	C1orf127	45655
1615	chr10	69331996	69335693	3698	Promoter (2-3kb)	69338020	69386791	48772	3098	ENST00000494253.1	HK1	-2327
1616	chr4	115359413	115361025	1613	Distal Intergenic	114827773	115113876	286104	64579	ENST00000613194.4	NDST4	-245537
1617	chr4	83864319	83868383	4065	Intron (ENST00000513489.5/101928978, intron 4 of 5)	83598529	83605139	6611	84803	ENST00000509044.1	GPAT3	265790
1618	chr8	121531717	121532064	348	Distal Intergenic	121639293	121643451	4159	594842	ENST00000518865.5	HAS2-AS1	-107229
1619	chr17	59456351	59457703	1353	Intron (ENST00000577478.2/101927728, intron 2 of 6)	59388840	59397149	8310	388403	ENST00000582813.1	YPEL2	67511
1620	chr14	76978303	76978517	215	Intron (ENST00000647580.1/ENST00000647580.1, intron 1 of 1)	76959638	76965802	6165	105370578	ENST00000553613.1	LINC01629	18665
1621	chr6	30841395	30844907	3513	Intron (ENST00000442852.1/105375014, intron 2 of 2)	30839526	30848159	8634	105375014	ENST00000442852.1	LINC02570	3252
1622	chr2	119111003	119112746	1744	Distal Intergenic	119156243	119158889	2647	165257	ENST00000272520.3	C1QL2	46143
1623	chr1	24862138	24863187	1050	Distal Intergenic	24919345	24919416	72	102465437	ENST00000614863.1	MIR6731	56229
1624	chr6	32552720	32554216	1497	Exon (ENST00000411500.5/3128, exon 4 of 6)	32553046	32558186	5141	3128	ENST00000437650.2	HLA-DRB6	3970
1625	chr1	225225092	225225595	504	Intron (ENST00000445597.6/127602, intron 28 of 60)	225240794	225351883	111090	127602	ENST00000638635.1	DNAH14	-15199
1626	chr12	105961056	105961270	215	Distal Intergenic	106067579	106084033	16455	9891	ENST00000553094.1	NUAK1	122763
1627	chr17	80169635	80169849	215	Promoter (<=1kb)	80169992	80181569	11578	79092	ENST00000576785.5	CARD14	-143
1628	chr2	53058396	53058610	215	Distal Intergenic	52702522	52702615	94	100616431	ENST00000579990.1	MIR4431	-355781
1629	chr8	94062722	94062992	271	Distal Intergenic	94145969	94162128	16160	1015	ENST00000520952.1	CDH17	99136
1630	chr20	59049678	59049892	215	Distal Intergenic	59033145	59042909	9765	51012	ENST00000355937.8	PRELID3B	-6769
1631	chr11	59813798	59814564	767	Promoter (2-3kb)	59806135	59810872	4738	54948	ENST00000300151.4	MRPL16	-2926
1632	chr13	30863284	30867252	3969	Distal Intergenic	30882551	30883395	845	440132	ENST00000440633.1	LINC00545	-15299
1633	chr8	34372733	34372947	215	Distal Intergenic	34784052	34864798	80747	103689844	ENST00000519189.1	LINC01288	-411105
1634	chr9	85558845	85559059	215	Intron (ENST00000376083.7/23287, intron 25 of 25)	85553873	85579025	25153	23287	ENST00000489265.1	AGTPBP1	19966
1635	chr6	15148278	15148561	284	Distal Intergenic	15246296	15522021	275726	3720	ENST00000341776.6	JARID2	-97735
1636	chr1	72009869	72010646	778	Intron (ENST00000357731.9/257194, intron 1 of 6)	71697946	72100917	402972	257194	ENST00000467479.1	NEGR1	90271
1637	chr3	166284470	166285657	1188	Distal Intergenic	165772904	165837472	64569	590	ENST00000264381.7	BCHE	-446998
1638	chr8	71322155	71323648	1494	Promoter (<=1kb)	71317659	71322461	4803	2138	ENST00000422295.1	EYA1	0
1639	chr8	133057536	133058073	538	Promoter (2-3kb)	133050210	133060288	10079	6503	ENST00000519504.5	SLA	2215
1640	chr8	130691901	130692318	418	Distal Intergenic	130052842	130443660	390819	50807	ENST00000518721.5	ASAP1	-248241
1641	chr20	5582179	5583750	1572	Promoter (2-3kb)	5544439	5586037	41599	56261	ENST00000481038.5	GPCPD1	2287
1642	chr3	132203594	132206057	2464	Intron (ENST00000512055.5/131034, intron 2 of 19)	131533565	132285410	751846	131034	ENST00000512055.5	CPNE4	79353
1643	chr11	62380928	62384467	3540	3' UTR	62391498	62392585	1088	80150	ENST00000525708.1	ASRGL1	-7031
1644	chr14	100843162	100843430	269	Promoter (2-3kb)	100845459	100853174	7716	55384	ENST00000648547.1	MEG3	-2029
1645	chr1	203354056	203354323	268	Promoter (2-3kb)	203340661	203351758	11098	2331	ENST00000647586.1	FMOD	-2298
1646	chr14	44440240	44440634	395	Distal Intergenic	44504342	44507279	2938	84075	ENST00000340446.4	FSCB	66645
1647	chr6	31562846	31564458	1613	Distal Intergenic	31572054	31574324	2271	4049	ENST00000454783.5	LTA	-7596
1648	chrX	133793974	133795188	1215	Intron (ENST00000370818.7/2719, intron 2 of 7)	133596366	133753702	157337	2719	ENST00000406757.2	GPC3	-40272
1649	chr6	168745888	168746157	270	Distal Intergenic	168653203	168673445	20243	64094	ENST00000477998.1	SMOC2	92685
1650	chr6	4779692	4782890	3199	Intron (ENST00000328908.9/9425, intron 3 of 8)	4776442	4954510	178069	9425	ENST00000472453.5	CDYL	3250
1651	chr2	190924864	190925279	416	Promoter (1-2kb)	190927004	190933008	6005	2744	ENST00000409626.5	GLS	-1725
1652	chr10	96794452	96795611	1160	Distal Intergenic	96828669	96828764	96	693192	ENST00000385241.1	MIR607	33153
1653	chr17	79016787	79028298	11512	Promoter (<=1kb)	79019209	79027601	8393	100507410	ENST00000581579.1	C1QTNF1-AS1	0
1654	chr13	73054630	73076665	22036	Promoter (<=1kb)	73054976	73062661	7686	688	ENST00000477333.5	KLF5	0
1655	chr4	140304927	140305772	846	Intron (ENST00000394205.7/60592, intron 1 of 4)	140343443	140382554	39112	60592	ENST00000338517.8	SCOC	-37671
1656	chr12	86660479	86660881	403	Intron (ENST00000621808.4/25834, intron 2 of 8)	86002352	86601304	598953	25834	ENST00000602941.6	MGAT4C	-59175
1657	chrX	113803375	113803589	215	Intron (ENST00000468762.3/105463123, intron 3 of 4)	113616300	114059121	442822	105463123	ENST00000468762.3	XACT	255532
1658	chr6	105604990	105610917	5928	Distal Intergenic	105277565	105403084	125520	5550	ENST00000369110.7	PREP	-201906
1659	chr2	213175392	213175931	540	Distal Intergenic	213155806	213167712	11907	105373863	ENST00000426870.1	LINC01953	-7680
1660	chr1	183847136	183848196	1061	Exon (ENST00000304685.8/23179, exon 4 of 19)	183805120	183928531	123412	23179	ENST00000360851.3	RGL1	42016
1661	chr21	26795652	26796607	956	Distal Intergenic	26838093	26840489	2397	9510	ENST00000492656.1	ADAMTS1	43882
1662	chr9	5807102	5808949	1848	Intron (ENST00000462592.5/79956, intron 8 of 15)	5784571	5832841	48271	79956	ENST00000214893.9	ERMP1	23892
1663	chr17	11618689	11619554	866	Promoter (1-2kb)	11617400	11619934	2535	1770	ENST00000585197.1	DNAH9	1289
1664	chr5	74250681	74251297	617	Distal Intergenic	74306410	74308325	1916	102503429	ENST00000507890.1	LINC01335	57028
1665	chr11	130028558	130032461	3904	Distal Intergenic	130002938	130004356	1419	440072	ENST00000530583.1	LINC00167	25620
1666	chr12	65845255	65846918	1664	Intron (ENST00000403681.6/8091, intron 3 of 4)	65828001	65963410	135410	8091	ENST00000539662.1	HMGA2	17254
1667	chr2	9061171	9061385	215	Distal Intergenic	8852690	9003813	151124	129642	ENST00000305997.7	MBOAT2	-57358
1668	chr14	31991160	31995169	4010	Distal Intergenic	31944853	31950382	5530	105370439	ENST00000553330.1	LINC02313	46307
1669	chr4	56731447	56733361	1915	Distal Intergenic	56647988	56681899	33912	84525	ENST00000337881.11	HOPX	-49548
1670	chr3	189022802	189023324	523	Intron (ENST00000433971.5/285386, intron 3 of 10)	188941715	188947639	5925	100874043	ENST00000444488.1	TPRG1-AS1	-75163
1671	chr7	24335903	24336532	630	Distal Intergenic	24285107	24291824	6718	4852	ENST00000405982.1	NPY	50796
1672	chr8	88190371	88191717	1347	Intron (ENST00000286614.10/4325, intron 2 of 9)	88069233	88327206	257974	4325	ENST00000544227.5	MMP16	135489
1673	chr17	1218987	1219256	270	Intron (ENST00000575934.5/29, intron 1 of 3)	1083522	1229004	145483	29	ENST00000575934.5	ABR	9748
1674	chr22	28142791	28143229	439	Intron (ENST00000612946.4/23331, intron 4 of 20)	28028815	28094135	65321	23331	ENST00000442232.1	TTC28	-48656
1675	chrX	43037211	43037425	215	Distal Intergenic	43176994	43226598	49605	101927501	ENST00000440955.1	PINCR	-139569
1676	chr6	40744808	40745550	743	Distal Intergenic	40391586	40587465	195880	57497	ENST00000338305.6	LRFN2	-157343
1677	chr19	52960984	52964058	3075	Promoter (<=1kb)	52928475	52962823	34349	100529240	ENST00000391777.3	ZNF816-ZNF321P	0
1678	chrX	10061912	10063565	1654	5' UTR	10015795	10016862	1068	55841	ENST00000466248.1	WWC3	46117
1679	chr1	117335820	117336034	215	Distal Intergenic	117367449	117528872	161424	10905	ENST00000356554.7	MAN1A2	-31415
1680	chr2	6430013	6430315	303	Distal Intergenic	6366010	6375422	9413	101929390	ENST00000448901.1	LINC01247	-54591
1681	chr17	58619062	58619389	328	Intron (ENST00000389934.7/56155, intron 5 of 32)	58565752	58573251	7500	56155	ENST00000581147.1	TEX14	-45811
1682	chr1	64132506	64133137	632	Intron (ENST00000371080.5/4919, intron 4 of 6)	64094442	64112205	17764	101927034	ENST00000412349.6	ROR1-AS1	-20301
1683	chr4	145837097	145838307	1211	Intron (ENST00000514334.1/ENST00000514334.1, intron 2 of 2)	145819838	145845992	26155	152485	ENST00000509940.1	ZNF827	7685
1684	chr15	84213926	84214140	215	Intron (ENST00000559668.5/388152, intron 1 of 4)	84203866	84205319	1454	388152	ENST00000560408.5	GOLGA2P7	-8607
1685	chr13	54541220	54541434	215	Distal Intergenic	54311972	54312048	77	100302187	ENST00000637311.1	MIR1297	-229172
1686	chr14	88533817	88538963	5147	Intron (ENST00000328736.7/11099, intron 1 of 17)	88467955	88550530	82576	11099	ENST00000536337.5	PTPN21	11567
1687	chr3	176916231	176918372	2142	Distal Intergenic	176814155	176817001	2847	101928684	ENST00000451289.1	LINC01209	-99230
1688	chr4	100868922	100869327	406	Intron (ENST00000510657.1/51705, intron 1 of 5)	100479972	100880126	400155	51705	ENST00000510657.1	EMCN	10799
1689	chr2	30422978	30423192	215	Distal Intergenic	30447226	30552549	105324	253558	ENST00000466477.5	LCLAT1	-24034
1690	chrX	54324969	54325698	730	Intron (ENST00000375169.7/65267, intron 2 of 22)	54198324	54333673	135350	65267	ENST00000375159.6	WNK3	7975
1691	chr19	38272623	38274944	2322	Intron (ENST00000590510.5/10653, intron 1 of 2)	38265338	38287935	22598	10653	ENST00000592007.1	SPINT2	7285
1692	chr2	64848855	64849278	424	Intron (ENST00000445865.1/101927438, intron 2 of 4)	64846130	64863626	17497	101927438	ENST00000445865.1	LINC01800	14348
1693	chr18	5543345	5544208	864	Promoter (<=1kb)	5392433	5543967	151535	23136	ENST00000400111.8	EPB41L3	0
1694	chr5	142445490	142447772	2283	Intron (ENST00000510311.5/101926941, intron 3 of 3)	142404218	142530130	125913	101926941	ENST00000425963.1	SPRY4-AS1	41272
1695	chrX	122932990	122933751	762	Distal Intergenic	123184153	123204683	20531	2892	ENST00000616590.4	GRIA3	-250402
1696	chr7	31498654	31498868	215	Distal Intergenic	31514071	31653689	139619	223075	ENST00000615280.4	ITPRID1	-15203
1697	chr4	46251286	46251500	215	Intron (ENST00000510861.5/2555, intron 9 of 9)	46302507	46305577	3071	2555	ENST00000514236.1	GABRA2	54077
1698	chr12	25489631	25490291	661	Intron (ENST00000543629.5/160492, intron 4 of 4)	25502925	25519961	17037	160492	ENST00000539523.1	LMNTD1	29670
1699	chr5	151739849	151741719	1871	Downstream (<1kb)	151742822	151746563	3742	475	ENST00000522145.5	ATOX1	4844
1700	chr3	153687766	153690193	2428	Intron (ENST00000493214.2/105374165, intron 2 of 6)	153385109	153762526	377418	105374165	ENST00000493214.2	LINC02006	72333
1701	chr3	189839083	189840250	1168	Intron (ENST00000264731.7/8626, intron 4 of 13)	189829922	189830009	88	100126340	ENST00000401239.1	MIR944	9161
1702	chr10	59748498	59749361	864	Intron (ENST00000430431.5/100507027, intron 1 of 3)	59737198	59744864	7667	100507027	ENST00000599605.1	MRLN	-3634
1703	chr11	10526804	10530424	3621	Intron (ENST00000265981.6/50862, intron 3 of 5)	10519034	10540906	21873	50862	ENST00000533412.5	RNF141	10482
1704	chr12	55954426	55958332	3907	Promoter (<=1kb)	55954276	55957342	3067	6490	ENST00000549564.1	PMEL	0
1705	chr6	99334771	99335788	1018	Intron (ENST00000389677.5/84553, intron 2 of 5)	99280667	99342934	62268	84553	ENST00000538471.1	FAXC	7146
1706	chr21	41164713	41166179	1467	Promoter (1-2kb)	41167557	41167629	73	100423023	ENST00000582241.1	MIR3197	-1378
1707	chr4	73978377	73980076	1700	Promoter (2-3kb)	73981077	73982124	1048	5196	ENST00000296029.3	PF4	2048
1708	chr17	35460217	35460597	381	Exon (ENST00000588022.1/ENST00000588022.1, exon 1 of 1)	35438984	35448837	9854	146857	ENST00000530782.5	SLFN13	-11380
1709	chr3	159667439	159674001	6563	Intron (ENST00000639147.1/100505385, intron 3 of 3)	159763713	159764963	1251	100505385	ENST00000640565.1	IQCJ-SCHIP1	-89712
1710	chr12	56520182	56529300	9119	Promoter (<=1kb)	56521929	56596196	74268	5939	ENST00000262031.9	RBMS2	0
1711	chr1	75720668	75721432	765	Promoter (2-3kb)	75724347	75763679	39333	34	ENST00000541113.5	ACADM	-2915
1712	chr20	4227410	4228286	877	Intron (ENST00000379453.5/146, intron 1 of 1)	4221681	4222381	701	146	ENST00000621688.1	ADRA1D	-5029
1713	chr11	80699160	80699573	414	Distal Intergenic	80751200	80762826	11627	101928944	ENST00000526840.1	LOC101928944	63253
1714	chr9	4344070	4346022	1953	Promoter (2-3kb)	4285539	4348392	62854	169792	ENST00000471664.1	GLIS3	2370
1715	chr19	31408104	31409815	1712	Intron (ENST00000585336.1/ENST00000585336.1, intron 3 of 3)	31274945	31349547	74603	57616	ENST00000240587.4	TSHZ3	-58557
1716	chr10	6740473	6740740	268	Exon (ENST00000650334.1/108570035, exon 2 of 2)	6737418	6840712	103295	100507127	ENST00000648995.1	LINC00707	3055
1717	chr8	28163136	28166768	3633	Intron (ENST00000521015.5/55140, intron 14 of 14)	28158598	28190089	31492	55140	ENST00000517975.1	ELP3	4538
1718	chr1	34580308	34580647	340	Distal Intergenic	34669599	34669694	96	693137	ENST00000385206.1	MIR552	89047
1719	chr2	55022786	55023518	733	Intron (ENST00000405240.5/57142, intron 3 of 8)	54972187	55010449	38263	57142	ENST00000394609.6	RTN4	-12337
1720	chr10	21327392	21327662	271	Distal Intergenic	21340233	21372950	32718	105376444	ENST00000433460.1	LINC02643	45288
1721	chr8	99063588	99063917	330	Intron (ENST00000355155.5/157680, intron 3 of 17)	99103059	99121332	18274	157680	ENST00000524330.1	VPS13B	-39142
1722	chr10	53724461	53724675	215	Distal Intergenic	53808522	53810664	2143	65217	ENST00000615043.1	PCDH15	85989
1723	chr14	26204472	26205460	989	Distal Intergenic	26519199	26595461	76263	4857	ENST00000551754.1	NOVA1	390001
1724	chr17	72428073	72428287	215	Promoter (<=1kb)	72421829	72428247	6419	100499467	ENST00000577773.2	LINC00673	0
1725	chr12	90938175	90939006	832	Exon (ENST00000546725.1/439916, exon 2 of 5)	90952495	90953696	1202	196477	ENST00000549707.1	CCER1	14690
1726	chr8	29464235	29464449	215	Distal Intergenic	29333064	29350668	17605	1846	ENST00000240100.6	DUSP4	-113567
1727	chr14	92596068	92596643	576	Intron (ENST00000216487.11/79890, intron 3 of 9)	92577295	92586580	9286	79890	ENST00000555891.1	RIN3	18773
1728	chr2	132681035	132681669	635	Intron (ENST00000640590.1/344148, intron 2 of 2)	132645787	132671579	25793	116372	ENST00000345008.6	LYPD1	-9456
1729	chrX	134541901	134542264	364	Promoter (<=1kb)	134541341	134541437	97	664617	ENST00000385050.3	MIR542	-464
1730	chr14	55139089	55139303	215	Promoter (1-2kb)	55138044	55140440	2397	3958	ENST00000556263.1	LGALS3	1045
1731	chr4	166435913	166436127	215	Intron (ENST00000514134.1/ENST00000514134.1, intron 3 of 3)	165874958	165995178	120221	7092	ENST00000506144.1	TLL1	560955
1732	chr10	72164946	72165924	979	Intron (ENST00000394919.5/51008, intron 5 of 9)	72097041	72161556	64516	51008	ENST00000530394.5	ASCC1	-3390
1733	chr6	125362724	125363906	1183	Distal Intergenic	125297487	125302078	4592	51020	ENST00000608284.1	HDDC2	-60646
1734	chr9	134661533	134661911	379	Intron (ENST00000371817.7/1289, intron 1 of 65)	134653185	134709227	56043	1289	ENST00000464187.1	COL5A1	8348
1735	chr4	185288523	185289146	624	Intron (ENST00000618785.4/83891, intron 6 of 17)	185295827	185363510	67684	83891	ENST00000512853.5	SNX25	-6681
1736	chr14	22150889	22151163	275	Distal Intergenic	22381494	22383169	1676	105370401	ENST00000545498.5	LOC105370401	232006
1737	chr6	146857660	146858307	648	Intron (ENST00000606831.1/729178, intron 2 of 4)	146850159	146851005	847	729178	ENST00000433308.1	STXBP5-AS1	-6655
1738	chr11	105249750	105249964	215	Intron (ENST00000649856.1/59082, intron 4 of 7)	105137721	105139726	2006	59082	ENST00000530950.1	CARD18	-110024
1739	chr5	143879081	143881000	1920	Distal Intergenic	143812268	143820568	8301	57824	ENST00000638299.1	HMHB1	66813
1740	chr9	81473891	81474236	346	Distal Intergenic	81599865	81613522	13658	7088	ENST00000376484.1	TLE1	139286
1741	chr3	57057750	57057964	215	Promoter (2-3kb)	57060441	57075432	14992	353324	ENST00000334325.1	SPATA12	-2477
1742	chr1	9814695	9817149	2455	Intron (ENST00000377298.8/22883, intron 1 of 18)	9729027	9823669	94643	22883	ENST00000650348.1	CLSTN1	6520
1743	chr5	144189371	144192953	3583	Intron (ENST00000512467.5/57528, intron 2 of 3)	144205277	144485686	280410	57528	ENST00000507359.3	KCTD16	-12324
1744	chr4	56738847	56739119	273	Distal Intergenic	56647988	56681899	33912	84525	ENST00000337881.11	HOPX	-56948
1745	chr3	64877769	64879245	1477	Intron (ENST00000650103.1/100507098, intron 4 of 11)	64515654	64688000	172347	56999	ENST00000498707.5	ADAMTS9	-189769
1746	chr20	51014805	51015090	286	Promoter (<=1kb)	51010195	51014108	3914	3755	ENST00000447736.1	KCNG1	-697
1747	chr7	20301170	20305592	4423	Promoter (<=1kb)	20305711	20311712	6002	101927769	ENST00000455373.1	LOC101927769	-119
1748	chr11	114314213	114320179	5967	Intron (ENST00000544925.1/ENST00000544925.1, intron 1 of 2)	114298151	114312515	14365	4837	ENST00000545255.1	NNMT	16062
1749	chr2	226180408	226180952	545	Exon (ENST00000423838.1/ENST00000423838.1, exon 2 of 2)	226658710	226658793	84	100847053	ENST00000582265.1	MIR5702	477841
1750	chr12	122638101	122638521	421	Distal Intergenic	122620042	122626375	6334	9735	ENST00000534995.1	KNTC1	18059
1751	chr21	34309635	34311045	1411	Intron (ENST00000362077.4/64968, intron 5 of 5)	34364024	34371389	7366	9992	ENST00000290310.3	KCNE2	-52979
1752	chr18	30623197	30624552	1356	Distal Intergenic	30298910	30298960	51	100302131	ENST00000635955.1	MIR302F	324287
1753	chr6	73694528	73697438	2911	Promoter (<=1kb)	73693903	73696131	2229	101928489	ENST00000428865.2	LOC101928489	0
1754	chr21	32077699	32078821	1123	Downstream (1-2kb)	32080316	32086295	5980	100551499	ENST00000411605.5	LINC00159	7474
1755	chr7	157318156	157318370	215	Distal Intergenic	157335381	157382336	46956	10049	ENST00000441561.5	DNAJB6	-17011
1756	chr2	9797358	9804055	6698	Distal Intergenic	9843354	9934416	91063	9014	ENST00000263663.9	TAF1B	-39299
1757	chrX	84173403	84177625	4223	Intron (ENST00000620340.4/27330, intron 1 of 21)	84058346	84186141	127796	27330	ENST00000620340.4	RPS6KA6	8516
1758	chr1	187862901	187863342	442	Distal Intergenic	187307394	187487248	179855	106144535	ENST00000644419.1	LINC01037	555507
1759	chr6	64680216	64681759	1544	Intron (ENST00000503581.5/346007, intron 22 of 42)	64593131	64713335	120205	346007	ENST00000330816.5	EYS	31576
1760	chr11	94656862	94657145	284	Intron (ENST00000536540.5/105369438, intron 4 of 4)	94617789	94621113	3325	143689	ENST00000537419.1	PIWIL4	39073
1761	chr21	35537994	35539338	1345	Intron (ENST00000475045.6/101928269, intron 8 of 12)	35372507	35580760	208254	100506403	ENST00000467692.5	LOC100506403	41422
1762	chr9	83030599	83030813	215	Intron (ENST00000376447.3/158158, intron 1 of 16)	82979585	83063128	83544	158158	ENST00000376447.3	RASEF	32315
1763	chr4	38422881	38425535	2655	Intron (ENST00000512517.1/101928776, intron 7 of 7)	38366914	38385759	18846	105374410	ENST00000503465.1	LINC02513	55967
1764	chr2	86335655	86335869	215	Promoter (1-2kb)	86263994	86337065	73072	65055	ENST00000475475.1	REEP1	1196
1765	chr4	78714303	78715104	802	Distal Intergenic	78776342	78879435	103094	55589	ENST00000389010.7	BMP2K	-61238
1766	chr12	65620303	65620517	215	Intron (ENST00000537250.5/100507065, intron 1 of 3)	65608471	65613229	4759	100507065	ENST00000355869.2	LOC100507065	-7074
1767	chr4	89560402	89560616	215	Intron (ENST00000506864.5/ENST00000506864.5, intron 1 of 3)	89236386	89308010	71625	285513	ENST00000609438.1	GPRIN3	-252392
1768	chr18	55762852	55763246	395	Intron (ENST00000589662.1/ENST00000589662.1, intron 1 of 3)	55779111	55780750	1640	100132501	ENST00000588134.1	LINC01415	17504
1769	chr11	119704256	119705674	1419	Intron (ENST00000341398.6/5818, intron 1 of 7)	119677095	119687357	10263	5818	ENST00000524510.1	NECTIN1	-16899
1770	chr1	236419547	236422364	2818	Intron (ENST00000637660.1/128178, intron 3 of 5)	236395449	236502915	107467	128178	ENST00000642595.1	EDARADD	24098
1771	chr10	78633719	78635855	2137	Intron (ENST00000421324.4/ENST00000421324.4, intron 2 of 2)	78943328	78962394	19067	283050	ENST00000428862.5	ZMIZ1-AS1	326539
1772	chr4	138851893	138852107	215	Intron (ENST00000511951.1/105377448, intron 2 of 2)	138819954	138821465	1512	105377448	ENST00000505607.1	LOC105377448	-30428
1773	chr7	20267211	20267425	215	Distal Intergenic	20296708	20311712	15005	101927769	ENST00000446399.5	LOC101927769	-29283
1774	chr19	6511537	6514246	2710	Distal Intergenic	6496176	6502848	6673	10382	ENST00000601640.5	TUBB4A	-8689
1775	chr7	82048843	82051381	2539	3' UTR	82012043	82038235	26193	781	ENST00000492734.1	CACNA2D1	-10608
1776	chr11	69336711	69337935	1225	Exon (ENST00000541137.5/ENST00000541137.5, exon 1 of 5)	69294174	69295662	1489	26579	ENST00000540760.1	MYEOV	42537
1777	chrX	45806641	45807367	727	Distal Intergenic	45848074	45851490	3417	401585	ENST00000456532.1	LINC02595	44123
1778	chr4	8473067	8473281	215	Promoter (<=1kb)	8473307	8475965	2659	152992	ENST00000511149.1	TRMT44	-26
1779	chr13	22813435	22814264	830	Distal Intergenic	22897341	22898005	665	646201	ENST00000430708.1	BASP1P1	83741
1780	chr7	116399923	116400532	610	Intron (ENST00000477018.5/858, intron 7 of 10)	116499390	116508541	9152	858	ENST00000222693.4	CAV2	-98858
1781	chr15	98906506	98907513	1008	Intron (ENST00000649865.1/3480, intron 5 of 20)	98913176	98922242	9067	3480	ENST00000560144.1	IGF1R	-5663
1782	chr4	173074038	173074340	303	Distal Intergenic	173168753	173323967	155215	51809	ENST00000265000.8	GALNT7	-94413
1783	chr1	181353940	181354896	957	Intron (ENST00000524607.6/777, intron 1 of 11)	181317690	181716129	398440	777	ENST00000524607.6	CACNA1E	36250
1784	chr14	71856053	71856267	215	Intron (ENST00000555581.1/ENST00000555581.1, intron 1 of 1)	71932439	72562476	630038	9628	ENST00000553525.5	RGS6	-76172
1785	chr6	27176587	27179394	2808	Distal Intergenic	27147626	27147688	63	100422934	ENST00000584253.1	MIR3143	28961
1786	chr17	48264492	48267052	2561	Intron (ENST00000336915.10/8631, intron 4 of 12)	48294335	48307666	13332	105371807	ENST00000621191.1	THRA1/BTR	-27283
1787	chr12	31618228	31621436	3209	Distal Intergenic	31647160	31668075	20916	254013	ENST00000412352.6	ETFBKMT	-25724
1788	chr7	31529523	31529737	215	Promoter (<=1kb)	31529675	31658720	129046	223075	ENST00000451887.6	ITPRID1	0
1789	chr10	7153202	7153914	713	Distal Intergenic	7348142	7408745	60604	57713	ENST00000379711.2	SFMBT2	254831
1790	chr12	70828054	70828268	215	Intron (ENST00000283228.6/5801, intron 2 of 13)	70638931	70788982	150052	5801	ENST00000342084.8	PTPRR	-39072
1791	chr12	91381155	91382233	1079	Distal Intergenic	91140484	91183123	42640	1634	ENST00000052754.9	DCN	-198032
1792	chr12	117679657	117679871	215	Promoter (2-3kb)	117517706	117677251	159546	283455	ENST00000545002.1	KSR2	-2406
1793	chr5	36605763	36608857	3095	Promoter (<=1kb)	36606355	36688332	81978	6507	ENST00000612708.4	SLC1A3	0
1794	chr15	67927545	67928444	900	Distal Intergenic	67839939	67840045	107	101954271	ENST00000383898.1	RNU6-9	-87500
1795	chr4	26262752	26263189	438	Intron (ENST00000512351.5/3516, intron 1 of 4)	26272607	26424426	151820	3516	ENST00000510778.6	RBPJ	-9418
1796	chr12	122901258	122902420	1163	Distal Intergenic	122865328	122896444	31117	79720	ENST00000267202.6	VPS37B	-4814
1797	chr4	16074828	16075529	702	Promoter (<=1kb)	16003267	16075778	72512	8842	ENST00000511153.5	PROM1	249
1798	chr4	1998049	1999223	1175	Intron (ENST00000382882.7/7469, intron 1 of 10)	1982730	1992624	9895	7469	ENST00000416258.5	NELFA	-5425
1799	chr7	82443448	82443969	522	Promoter (<=1kb)	81946444	82443798	497355	781	ENST00000356860.7	CACNA2D1	0
1800	chr14	34650276	34650955	680	Distal Intergenic	34562409	34630183	67775	58533	ENST00000362031.8	SNX6	-20093
1801	chr3	184601622	184602098	477	Distal Intergenic	184579748	184580700	953	2049	ENST00000473079.1	EPHB3	21874
1802	chr13	23656010	23659162	3153	Exon (ENST00000248484.8/55504, exon 6 of 10)	23579380	23676093	96714	55504	ENST00000382263.3	TNFRSF19	76630
1803	chr2	152508113	152508442	330	Intron (ENST00000288670.13/114793, intron 1 of 25)	152578621	152607653	29033	114793	ENST00000492942.1	FMNL2	-70179
1804	chr20	19211795	19213512	1718	Promoter (<=1kb)	19212646	19722937	510292	57419	ENST00000328041.10	SLC24A3	0
1805	chr7	128267124	128267798	675	Distal Intergenic	128241284	128257628	16345	3952	ENST00000308868.4	LEP	25840
1806	chr6	167699182	167700768	1587	Promoter (2-3kb)	167680692	167696290	15599	441178	ENST00000644320.1	LINC02487	-2892
1807	chr1	232477134	232478740	1607	Intron (ENST00000366630.5/57568, intron 6 of 21)	232398710	232462417	63708	57568	ENST00000308942.4	SIPA1L2	-14717
1808	chr12	88144469	88146702	2234	Promoter (2-3kb)	88142307	88160710	18404	160418	ENST00000551088.1	TMTC3	2162
1809	chr5	108217268	108217482	215	Intron (ENST00000359660.9/64839, intron 5 of 8)	108020799	108364767	343969	64839	ENST00000481160.1	FBXL17	147285
1810	chr4	143241224	143242536	1313	Distal Intergenic	143185694	143223830	38137	84640	ENST00000511739.1	USP38	55530
1811	chr7	42973629	42973843	215	Intron (ENST00000585996.5/ENST00000585996.5, intron 2 of 2)	42935043	42948958	13916	64983	ENST00000496564.1	MRPL32	38586
1812	chr6	92589220	92590844	1625	Distal Intergenic	93240020	93419526	179507	2045	ENST00000369303.8	EPHA7	828682
1813	chr11	86805387	86805859	473	Intron (ENST00000527521.1/11098, intron 1 of 1)	86800544	86932934	132391	11098	ENST00000533880.1	PRSS23	4843
1814	chr3	64665436	64666876	1441	Intron (ENST00000498707.5/56999, intron 3 of 39)	64654390	64656044	1655	56999	ENST00000494004.1	ADAMTS9	-9392
1815	chr4	56695784	56695998	215	Distal Intergenic	56647988	56681899	33912	84525	ENST00000337881.11	HOPX	-13885
1816	chr17	64301993	64302969	977	Distal Intergenic	64147687	64263301	115615	55852	ENST00000584379.5	TEX2	-38692
1817	chr4	11597260	11597940	681	Distal Intergenic	11393150	11429765	36616	9957	ENST00000002596.5	HS3ST1	-167495
1818	chr8	15537482	15537696	215	Promoter (2-3kb)	15540223	15766649	226427	7991	ENST00000382020.8	TUSC3	-2527
1819	chr8	54032532	54033513	982	Distal Intergenic	53966556	54022529	55974	6917	ENST00000521604.6	TCEA1	-10003
1820	chr1	81702373	81704884	2512	Promoter (2-3kb)	81699770	81991426	291657	23266	ENST00000359929.7	ADGRL2	2603
1821	chr1	5728368	5728996	629	Distal Intergenic	5862672	5862741	70	100616421	ENST00000582517.1	MIR4689	133745
1822	chr12	14072238	14074070	1833	Distal Intergenic	13866103	13981957	115855	2904	ENST00000630791.1	GRIN2B	-90281
1823	chr1	223743002	223743706	705	Intron (ENST00000433674.6/824, intron 2 of 20)	223747108	223749476	2369	824	ENST00000483579.1	CAPN2	-3402
1824	chr8	9041618	9041932	315	Intron (ENST00000520332.5/90459, intron 4 of 5)	9048445	9048518	74	100616350	ENST00000583549.1	MIR4660	-6513
1825	chr4	126939661	126940049	389	Distal Intergenic	127623271	127644036	20766	27152	ENST00000504491.1	INTU	-683222
1826	chr8	130237997	130238211	215	Promoter (1-2kb)	130179118	130236996	57879	50807	ENST00000519169.5	ASAP1	-1001
1827	chr1	89611952	89612470	519	Intron (ENST00000443562.1/400761, intron 1 of 4)	89583241	89632191	48951	400761	ENST00000443562.1	LRRC8C-DT	19721
1828	chr6	52351071	52353678	2608	Distal Intergenic	52361421	52403549	42129	85315	ENST00000512121.1	PAQR8	-7743
1829	chr7	7503029	7507885	4857	3' UTR	7417632	7520073	102442	340267	ENST00000444268.1	COL28A1	12188
1830	chr10	77948459	77950153	1695	Distal Intergenic	77927631	77929824	2194	100128292	ENST00000632919.1	DLG5-AS1	20828
1831	chr15	72235251	72235465	215	Distal Intergenic	72199032	72231822	32791	5315	ENST00000568883.5	PKM	-3429
1832	chr22	38463534	38464410	877	Distal Intergenic	38468062	38483447	15386	11015	ENST00000216014.8	KDELR3	-3652
1833	chr1	40244572	40245667	1096	Promoter (<=1kb)	40245947	40251683	5737	127391	ENST00000468258.1	TMCO2	-280
1834	chr10	48287922	48288832	911	Distal Intergenic	48156558	48274870	118313	143162	ENST00000374201.7	FRMPD2	-13052
1835	chr1	198264076	198265876	1801	Exon (ENST00000367385.8/140609, exon 5 of 10)	198277704	198319749	42046	140609	ENST00000493790.1	NEK7	-11828
1836	chr11	10568235	10569457	1223	Promoter (<=1kb)	10556966	10568691	11726	10894	ENST00000256178.7	LYVE1	0
1837	chr2	122422088	122422591	504	Distal Intergenic	123066151	123073481	7331	107985818	ENST00000432894.1	LINC01826	650890
1838	chr20	9593522	9595600	2079	Intron (ENST00000378423.5/57144, intron 4 of 10)	9505180	9514998	9819	101929329	ENST00000443469.1	LAMP5-AS1	-78524
1839	chr7	14760725	14762850	2126	Intron (ENST00000399322.7/1607, intron 1 of 24)	14580903	14736169	155267	1607	ENST00000471732.5	DGKB	-24556
1840	chr1	79322916	79323345	430	Distal Intergenic	78889764	79006718	116955	64123	ENST00000370742.3	ADGRL4	-316198
1841	chr12	20421129	20422129	1001	Intron (ENST00000359062.3/5139, intron 1 of 15)	20370125	20557224	187100	5139	ENST00000542675.1	PDE3A	51004
1842	chr3	57067146	57069821	2676	Intron (ENST00000334325.1/353324, intron 1 of 1)	57060441	57075432	14992	353324	ENST00000334325.1	SPATA12	6705
1843	chr4	61769475	61775975	6501	Exon (ENST00000461060.1/ENST00000461060.1, exon 1 of 1)	61895741	62072437	176697	23284	ENST00000502815.1	ADGRL3	-119766
1844	chr10	114350553	114350767	215	Intron (ENST00000304129.8/84632, intron 1 of 18)	114300516	114305133	4618	84632	ENST00000486300.1	AFAP1L2	-45420
1845	chr6	43709285	43710089	805	Distal Intergenic	43671784	43687791	16008	55168	ENST00000427312.1	MRPS18A	-21494
1846	chr9	76520514	76523493	2980	Intron (ENST00000648797.1/2650, intron 4 of 12)	76459283	76651203	191921	2650	ENST00000648797.1	GCNT1	61231
1847	chr18	44589515	44589893	379	Distal Intergenic	44323436	44531697	208262	101927921	ENST00000587877.1	LINC01478	-57818
1848	chr6	147063152	147064534	1383	Intron (ENST00000427394.5/729178, intron 5 of 10)	146861806	147119463	257658	729178	ENST00000458125.5	STXBP5-AS1	54929
1849	chr18	8121319	8126723	5405	Promoter (<=1kb)	8121852	8406666	284815	5797	ENST00000577827.5	PTPRM	0
1850	chr20	54194485	54194699	215	Distal Intergenic	54207847	54219953	12107	5203	ENST00000371419.6	PFDN4	-13148
1851	chr21	26776912	26777292	381	Distal Intergenic	26838093	26840489	2397	9510	ENST00000492656.1	ADAMTS1	63197
1852	chr11	131032056	131034470	2415	Distal Intergenic	130875436	130916509	41074	399979	ENST00000265909.8	SNX19	-115547
1853	chr3	42489717	42490785	1069	Promoter (<=1kb)	42489494	42519314	29821	7433	ENST00000487545.1	VIPR1	223
1854	chrX	135420845	135423022	2178	Promoter (<=1kb)	135421943	135428074	6132	399668	ENST00000417443.2	SMIM10L2A	0
1855	chr15	57311477	57313621	2145	Distal Intergenic	57319138	57323908	4771	101928611	ENST00000564843.1	LINC01413	-5517
1856	chr10	28327271	28328417	1147	Intron (ENST00000441595.2/143098, intron 2 of 11)	28054143	28334486	280344	143098	ENST00000441595.2	MPP7	6069
1857	chr4	188024063	188024277	215	Distal Intergenic	187995771	188005050	9280	132625	ENST00000326866.4	ZFP42	28292
1858	chr6	53961250	53961935	686	Intron (ENST00000505762.1/101927189, intron 1 of 2)	53930046	53997667	67622	101927189	ENST00000431554.2	LOC101927189	31204
1859	chr12	91608512	91610353	1842	Distal Intergenic	91988323	91993529	5207	256021	ENST00000551764.5	LINC01619	383176
1860	chrX	42867294	42870054	2761	Distal Intergenic	42777368	42778247	880	80316	ENST00000378131.3	PPP1R2C	-89047
1861	chr5	56110032	56111281	1250	Exon (ENST00000645512.1/ENST00000645512.1, exon 3 of 4)	56099882	56116951	17070	79722	ENST00000434982.2	ANKRD55	5670
1862	chr5	176434723	176434937	215	Distal Intergenic	176447628	176486427	38800	23197	ENST00000510730.5	FAF2	-12691
1863	chr19	34859999	34860711	713	Exon (ENST00000603718.1/ENST00000603718.1, exon 1 of 3)	34816157	34832869	16713	400685	ENST00000590963.1	LINC01801	-27130
1864	chr14	54624343	54626351	2009	Intron (ENST00000554335.5/23034, intron 2 of 12)	54652683	54702396	49714	23034	ENST00000555091.1	SAMD4A	-26332
1865	chr1	37732627	37732952	326	Promoter (1-2kb)	37713886	37731573	17688	284656	ENST00000534097.5	EPHA10	-1054
1866	chr2	207121196	207124631	3436	Promoter (<=1kb)	207081016	207124408	43393	8609	ENST00000467833.1	KLF7	0
1867	chr10	104067599	104068191	593	Intron (ENST00000369733.8/1308, intron 8 of 50)	104059685	104064548	4864	1308	ENST00000488320.1	COL17A1	-3051
1868	chr14	26402003	26402363	361	Distal Intergenic	26519199	26595461	76263	4857	ENST00000551754.1	NOVA1	193098
1869	chr18	72201321	72201602	282	Distal Intergenic	72536684	72540298	3615	147381	ENST00000581425.1	CBLN2	338696
1870	chr20	44993133	44994010	878	Intron (ENST00000372806.7/6789, intron 5 of 10)	44970542	44995257	24716	6789	ENST00000474717.2	STK4	22591
1871	chrX	41715913	41724318	8406	Promoter (<=1kb)	41724155	41730135	5981	27197	ENST00000302548.4	GPR82	0
1872	chr20	38673984	38675007	1024	Distal Intergenic	38647063	38651035	3973	343578	ENST00000414158.1	ARHGAP40	26921
1873	chr1	224542166	224543916	1751	Intron (ENST00000471578.5/149111, intron 2 of 5)	224529310	224681026	151717	149111	ENST00000496277.5	CNIH3	12856
1874	chr19	53768962	53776925	7964	Exon (ENST00000423096.1/ENST00000423096.1, exon 1 of 1)	53762344	53762430	87	574500	ENST00000384990.3	MIR519A2	6618
1875	chr1	28160653	28161110	458	Intron (ENST00000373857.7/5724, intron 1 of 1)	28147166	28177188	30023	5724	ENST00000373857.7	PTAFR	16078
1876	chr19	52266233	52266447	215	Distal Intergenic	52269571	52296046	26476	90321	ENST00000439461.5	ZNF766	-3124
1877	chr20	31869450	31871211	1762	Promoter (<=1kb)	31847637	31870664	23028	128853	ENST00000278979.7	DUSP15	0
1878	chr1	218602521	218603528	1008	Distal Intergenic	218524840	218525978	1139	440714	ENST00000491260.2	C1orf143	77681
1879	chr3	64690564	64692061	1498	Promoter (2-3kb)	64515654	64688000	172347	56999	ENST00000498707.5	ADAMTS9	-2564
1880	chr17	80824658	80824925	268	Intron (ENST00000574767.5/57521, intron 8 of 11)	80801640	80805632	3993	101928855	ENST00000570335.1	LOC101928855	-19026
1881	chr2	42495386	42495600	215	Promoter (<=1kb)	42494569	42756947	262379	57504	ENST00000405592.5	MTA3	817
1882	chr5	59317429	59318534	1106	Intron (ENST00000340635.10/5144, intron 1 of 14)	58974563	59356975	382413	5144	ENST00000405755.6	PDE4D	38441
1883	chr13	44032799	44033133	335	Distal Intergenic	44025319	44029937	4619	121838	ENST00000423211.1	LINC00284	7480
1884	chr5	137824654	137826069	1416	Intron (ENST00000514616.5/ENST00000514616.5, intron 4 of 4)	137801193	137810751	9559	4888	ENST00000510937.1	NPY6R	23461
1885	chr15	89868880	89869314	435	Intron (ENST00000336418.8/10239, intron 4 of 5)	89883931	89884030	100	100846993	ENST00000578736.1	MIR5009	14716
1886	chr2	185410145	185410417	273	Distal Intergenic	185719874	185738721	18848	101927196	ENST00000421998.5	FSIP2-AS2	328304
1887	chr13	110023440	110025180	1741	Intron (ENST00000614099.1/ENST00000614099.1, intron 2 of 2)	110053285	110054952	1668	104355146	ENST00000411690.2	LINC00396	-28105
1888	chr6	22663001	22663215	215	Distal Intergenic	22569493	22571666	2174	154150	ENST00000510882.3	HDGFL1	93508
1889	chr15	64892359	64898354	5996	Intron (ENST00000502574.1/80301, intron 5 of 5)	64911902	64931967	20066	348094	ENST00000496480.5	ANKDD1A	-13548
1890	chr15	72167404	72170184	2781	Promoter (<=1kb)	72166646	72170074	3429	196996	ENST00000568594.5	GRAMD2A	0
1891	chr18	7034462	7036286	1825	Exon (ENST00000389658.3/284217, exon 13 of 63)	7038572	7040237	1666	284217	ENST00000585178.1	LAMA1	3951
1892	chrX	72395241	72395455	215	Intron (ENST00000647613.1/55869, intron 9 of 11)	72329569	72349797	20229	55869	ENST00000650477.1	HDAC8	-45444
1893	chr19	21092516	21092853	338	Intron (ENST00000616183.1/148206, intron 1 of 1)	21084020	21091758	7739	148206	ENST00000600535.1	ZNF714	8496
1894	chr12	19430914	19433262	2349	Intron (ENST00000538425.5/121536, intron 1 of 3)	19439674	19522239	82566	121536	ENST00000398864.7	AEBP2	-6412
1895	chr3	98483472	98483686	215	Distal Intergenic	98497604	98498663	1060	402135	ENST00000427338.2	OR5K2	-13918
1896	chr5	153462975	153465239	2265	Distal Intergenic	153489615	153706172	216558	2890	ENST00000481559.6	GRIA1	-24376
1897	chrX	15864987	15865368	382	Distal Intergenic	15825806	15854931	29126	8905	ENST00000329235.6	AP1S2	-10056
1898	chr11	59704718	59709955	5238	Exon (ENST00000411291.1/ENST00000411291.1, exon 1 of 1)	59713456	59802708	89253	6809	ENST00000641815.1	STX3	-3501
1899	chr13	58452441	58453492	1052	Distal Intergenic	58211697	58233117	21421	106144531	ENST00000454780.2	LINC00374	-219324
1900	chr12	110840989	110841203	215	Intron (ENST00000551161.1/ENST00000551161.1, intron 1 of 1)	110846769	110881272	34504	160762	ENST00000550317.1	CCDC63	-5566
1901	chr9	27421983	27422332	350	Promoter (<=1kb)	27359024	27421714	62691	79817	ENST00000603061.1	MOB3B	-269
1902	chr3	143605866	143606080	215	Intron (ENST00000316549.10/285195, intron 6 of 15)	143552419	143698149	145731	285195	ENST00000483124.1	SLC9A9	92069
1903	chr10	28953509	28954902	1394	Distal Intergenic	28875598	28882311	6714	283080	ENST00000645413.1	C10orf126	77911
1904	chr7	72802540	72802810	271	Intron (ENST00000612372.4/441250, intron 3 of 11)	72558744	72828174	269431	441250	ENST00000612372.4	TYW1B	25364
1905	chr1	94627633	94631153	3521	Intron (ENST00000634870.1/101928079, intron 4 of 5)	94657925	94658250	326	101928079	ENST00000456551.1	SLC44A3-AS1	27097
1906	chr15	72140944	72142737	1794	3' UTR	72161482	72163789	2308	196996	ENST00000565233.5	GRAMD2A	21052
1907	chr2	174022576	174027278	4703	Promoter (<=1kb)	174025280	174027163	1884	100128905	ENST00000563759.1	LINC01960	0
1908	chr13	29647591	29647859	269	Distal Intergenic	29509410	29595688	86279	6541	ENST00000380752.9	SLC7A1	-51903
1909	chr1	143424762	143424976	215	Distal Intergenic	143419625	143420207	583	645166	ENST00000622095.1	LSP1P5	-4555
1910	chr8	56688154	56689304	1151	Distal Intergenic	56520378	56559823	39446	100507632	ENST00000524338.1	LINC00968	-128331
1911	chr4	152917915	152918186	272	Intron (ENST00000510497.1/ENST00000510497.1, intron 2 of 2)	152936352	152979686	43335	85462	ENST00000511601.5	FHDC1	-18166
1912	chr16	68646624	68646838	215	Promoter (<=1kb)	68645637	68679812	34176	1001	ENST00000566808.2	CDH3	987
1913	chr1	92029290	92031717	2428	Promoter (<=1kb)	92029982	92063536	33555	253152	ENST00000370383.4	EPHX4	0
1914	chr20	41009262	41010857	1596	Distal Intergenic	41028818	41124487	95670	7150	ENST00000361337.2	TOP1	-17961
1915	chr4	10297044	10297558	515	Distal Intergenic	10450887	10457176	6290	85460	ENST00000500268.6	ZNF518B	159618
1916	chr10	109961390	109961604	215	Intron (ENST00000369655.3/100505933, intron 1 of 4)	109946119	109957911	11793	100505933	ENST00000631276.2	ADD3-AS1	-3479
1917	chr6	110491346	110492521	1176	Distal Intergenic	110455429	110476641	21213	85413	ENST00000461487.1	SLC22A16	-14705
1918	chr5	114656416	114657032	617	Intron (ENST00000514115.5/101927078, intron 3 of 4)	114662961	114668406	5446	101927078	ENST00000506265.1	LOC101927078	11374
1919	chr12	24920882	24923373	2492	Intron (ENST00000261192.11/586, intron 1 of 10)	24817481	24903075	85595	586	ENST00000539282.5	BCAT1	-17807
1920	chr10	90318830	90320519	1690	Distal Intergenic	90402521	90540805	138285	101926942	ENST00000418379.1	LINC02653	220286
1921	chr12	68886558	68894008	7451	Intron (ENST00000551568.5/1368, intron 2 of 8)	68866825	68870382	3558	1368	ENST00000546912.1	CPM	-16176
1922	chr7	4737839	4740734	2896	Promoter (<=1kb)	4740859	4755051	14193	221937	ENST00000460979.2	FOXK1	-125
1923	chr6	24871503	24884772	13270	Promoter (<=1kb)	24839359	24877355	37997	9750	ENST00000378023.8	RIPOR2	0
1924	chr2	162490996	162491210	215	Intron (ENST00000618399.4/90134, intron 5 of 14)	162501985	162528360	26376	90134	ENST00000477019.1	KCNH7	37150
1925	chr10	122955449	122956554	1106	Promoter (1-2kb)	122931508	122954403	22896	80007	ENST00000481909.1	C10orf88	-1046
1926	chr21	42954960	42959149	4190	Distal Intergenic	42950928	42951014	87	100847013	ENST00000579137.1	MIR5692B	-3946
1927	chr2	99734731	99735006	276	Intron (ENST00000409236.6/3899, intron 8 of 22)	99554393	99578370	23978	3899	ENST00000445815.1	AFF3	-156361
1928	chr6	104526661	104527309	649	Distal Intergenic	104729170	104732370	3201	57531	ENST00000518228.1	HACE1	205061
1929	chr3	64508039	64508253	215	Distal Intergenic	64515657	64522511	6855	56999	ENST00000477180.1	ADAMTS9	14258
1930	chr1	201739160	201740997	1838	Promoter (<=1kb)	201739317	201803690	64374	89796	ENST00000490213.5	NAV1	0
1931	chr4	81896402	81897794	1393	Intron (ENST00000638048.1/153020, intron 2 of 16)	81427065	82044069	617005	153020	ENST00000638048.1	RASGEF1B	146275
1932	chr12	121747937	121750068	2132	Promoter (2-3kb)	121752129	121776158	24030	144404	ENST00000540377.1	TMEM120B	-2061
1933	chr4	74506482	74506946	465	Distal Intergenic	74448639	74450532	1894	374	ENST00000511560.1	AREG	57843
1934	chr7	114901331	114901609	279	Distal Intergenic	114922154	115019202	97049	29969	ENST00000257724.7	MDFIC	-20545
1935	chr21	21611421	21612703	1283	Intron (ENST00000428205.1/ENST00000428205.1, intron 1 of 1)	21723293	21737319	14027	378828	ENST00000419069.1	LINC00317	124616
1936	chr11	62350822	62351256	435	Intron (ENST00000415229.6/80150, intron 2 of 6)	62357053	62383247	26195	80150	ENST00000528206.1	ASRGL1	-5797
1937	chr19	37716479	37716693	215	Promoter (2-3kb)	37689883	37719125	29243	84775	ENST00000586606.6	ZNF607	2432
1938	chr18	3423872	3424936	1065	Intron (ENST00000552383.5/7050, intron 2 of 3)	3412856	3458406	45551	7050	ENST00000548489.6	TGIF1	11016
1939	chr4	180449640	180450068	429	Distal Intergenic	181064089	181159149	95061	728081	ENST00000512487.1	LINC00290	709081
1940	chr2	79392810	79395360	2551	Intron (ENST00000466387.5/1496, intron 4 of 21)	79493716	79500844	7129	101927987	ENST00000443301.1	LOC101927987	105484
1941	chr6	53805101	53805315	215	Intron (ENST00000487251.5/55227, intron 2 of 10)	53795090	53884145	89056	55227	ENST00000370882.1	LRRC1	10011
1942	chr11	104776726	104776940	215	Distal Intergenic	104886714	104898414	11701	100506742	ENST00000508062.1	CASP12	121474
1943	chr10	103226094	103234844	8751	Distal Intergenic	103245887	103248016	2130	729020	ENST00000441178.2	RPEL1	-11043
1944	chr4	88198396	88198779	384	Intron (ENST00000515655.5/9429, intron 1 of 15)	88090264	88231322	141059	9429	ENST00000515655.5	ABCG2	32543
1945	chr1	85524376	85528054	3679	Intron (ENST00000535924.6/23576, intron 1 of 6)	85482281	85496281	14001	23576	ENST00000488557.6	DDAH1	-28095
1946	chr16	62530484	62530698	215	Distal Intergenic	62021160	62037035	15876	1006	ENST00000584506.1	CDH8	-493449
1947	chr13	59488646	59489098	453	Distal Intergenic	59666741	59696193	29453	81624	ENST00000470420.1	DIAPH3	207095
1948	chr6	48014991	48017075	2085	Intron (ENST00000339488.8/442213, intron 1 of 2)	47899609	48068653	169045	442213	ENST00000398738.2	PTCHD4	51578
1949	chr14	61154092	61154306	215	Distal Intergenic	61187559	61530584	343026	5583	ENST00000555185.5	PRKCH	-33253
1950	chr7	108338291	108342063	3773	Intron (ENST00000379028.7/4897, intron 2 of 32)	108232417	108328655	96239	4897	ENST00000456431.5	NRCAM	-9636
1951	chr7	44598449	44598663	215	Distal Intergenic	44606572	44708230	101659	4967	ENST00000439616.6	OGDH	-7909
1952	chr8	60707430	60709771	2342	Intron (ENST00000423902.6/55636, intron 1 of 37)	60679564	60741530	61967	55636	ENST00000526846.1	CHD7	27866
1953	chr4	20839576	20840654	1079	Intron (ENST00000359001.9/80333, intron 1 of 6)	20728616	20850779	122164	80333	ENST00000359001.9	KCNIP4	10125
1954	chr17	28282000	28283811	1812	Intron (ENST00000577198.5/284085, intron 2 of 2)	28275986	28307382	31397	284085	ENST00000577198.5	KRT18P55	23571
1955	chr2	116022518	116022801	284	Distal Intergenic	115814663	115836682	22020	57628	ENST00000473362.1	DPP10	207855
1956	chr4	151781961	151782175	215	Distal Intergenic	151670504	151761023	90520	5188	ENST00000263985.10	GATB	-20938
1957	chr4	188435290	188440572	5283	Exon (ENST00000512839.5/401164, exon 2 of 5)	188455578	188538552	82975	401164	ENST00000510832.5	LINC01060	-15006
1958	chr1	151477740	151480598	2859	Distal Intergenic	151402724	151459465	56742	23126	ENST00000271715.6	POGZ	-18275
1959	chr8	12611661	12614844	3184	Intron (ENST00000635775.1/729732, intron 2 of 8)	12505001	12607664	102664	729732	ENST00000641839.1	LOC729732	-3997
1960	chr6	154654129	154654472	344	Distal Intergenic	154733325	154834060	100736	22828	ENST00000367178.7	SCAF8	-78853
1961	chr11	95241626	95246055	4430	Distal Intergenic	95232571	95234104	1534	100129203	ENST00000543573.1	LOC100129203	9055
1962	chr5	56526763	56528048	1286	Intron (ENST00000648716.1/101928448, intron 4 of 5)	56511722	56535230	23509	101928448	ENST00000611197.1	C5orf67	7182
1963	chr2	38276791	38280183	3393	Distal Intergenic	38297931	38300318	2388	64225	ENST00000477642.5	ATL2	20135
1964	chr2	158781065	158782820	1756	Distal Intergenic	158795317	158815993	20677	92196	ENST00000309950.7	DAPL1	-12497
1965	chr8	110641159	110642343	1185	Distal Intergenic	110982950	111027392	44443	101927459	ENST00000523557.1	LINC01608	385049
1966	chr3	112894541	112894810	270	Distal Intergenic	112815709	112846856	31148	344807	ENST00000488794.5	CD200R1L	-47685
1967	chr3	134448514	134448933	420	Distal Intergenic	134437827	134437906	80	100616281	ENST00000639104.1	MIR4788	10687
1968	chr2	102439549	102440151	603	Exon (ENST00000450893.1/ENST00000450893.1, exon 3 of 3)	102432289	102432366	78	100616157	ENST00000581495.1	MIR4772	7260
1969	chr1	47570256	47570470	215	Distal Intergenic	47436017	47440691	4675	2306	ENST00000334793.5	FOXD2	134239
1970	chr19	52893809	52894804	996	Promoter (1-2kb)	52881954	52892288	10335	162967	ENST00000597265.5	ZNF320	-1521
1971	chr3	67290979	67297473	6495	Exon (ENST00000484222.1/ENST00000484222.1, exon 1 of 2)	67225464	67225527	64	100422941	ENST00000635924.1	MIR4272	65515
1972	chr8	98844538	98846827	2290	Intron (ENST00000523601.5/6788, intron 3 of 12)	98454633	98825681	371049	6788	ENST00000419617.6	STK3	-18857
1973	chr5	61319299	61319669	371	Distal Intergenic	61332273	61546170	213898	57688	ENST00000252744.5	ZSWIM6	-12604
1974	chr16	57340946	57341846	901	Distal Intergenic	57358772	57366190	7419	6367	ENST00000219235.4	CCL22	-16926
1975	chr5	17345315	17345529	215	Distal Intergenic	17378906	17387310	8405	401177	ENST00000505158.1	LINC02111	41781
1976	chr1	183738618	183738832	215	Intron (ENST00000304685.8/23179, intron 1 of 18)	183805120	183928531	123412	23179	ENST00000360851.3	RGL1	-66288
1977	chr8	81297829	81299330	1502	Distal Intergenic	81283326	81284415	1090	2171	ENST00000481695.1	FABP5	14503
1978	chr3	12155217	12157120	1904	Promoter (1-2kb)	12158649	12168421	9773	6854	ENST00000447752.2	SYN2	-1529
1979	chr1	203156214	203156528	315	Intron (ENST00000309502.7/134, intron 5 of 5)	203152646	203166115	13470	134	ENST00000467253.1	ADORA1	3568
1980	chr2	230732232	230741107	8876	Intron (ENST00000258418.9/51719, intron 1 of 8)	230713548	230818750	105203	51719	ENST00000409788.7	CAB39	18684
1981	chr4	115451864	115455684	3821	Distal Intergenic	114827773	115113876	286104	64579	ENST00000613194.4	NDST4	-337988
1982	chr3	117938969	117941529	2561	Intron (ENST00000484092.1/ENST00000484092.1, intron 1 of 1)	117688579	117690932	2354	105374057	ENST00000496994.1	LINC02024	-248037
1983	chr8	27993255	27994059	805	Promoter (<=1kb)	27869882	27992727	122846	286133	ENST00000354914.7	SCARA5	-528
1984	chr9	134806884	134808479	1596	Promoter (<=1kb)	134808961	134810457	1497	1289	ENST00000463925.1	COL5A1	-482
1985	chr16	15928241	15928455	215	Distal Intergenic	15949577	16143062	193486	4363	ENST00000399410.7	ABCC1	-21122
1986	chr17	57364782	57378191	13410	3' UTR	57406812	57627302	220491	124540	ENST00000579205.5	MSI2	-28621
1987	chr5	103505028	103506049	1022	Intron (ENST00000412514.2/ENST00000412514.2, intron 3 of 9)	103528434	103541985	13552	102467212	ENST00000503367.2	LINC02115	35936
1988	chr10	23778438	23779454	1017	Intron (ENST00000376462.5/56243, intron 1 of 18)	23694782	23877495	182714	56243	ENST00000481700.1	KIAA1217	83656
1989	chr11	105261309	105261995	687	Intron (ENST00000649856.1/59082, intron 3 of 7)	105137721	105139726	2006	59082	ENST00000530950.1	CARD18	-121583
1990	chr19	23470448	23470662	215	Distal Intergenic	23400987	23416075	15089	104472717	ENST00000601293.5	LINC01224	-54373
1991	chr13	95252328	95252542	215	Intron (ENST00000645237.1/10257, intron 1 of 30)	95095797	95301302	205506	10257	ENST00000643556.1	ABCC4	48760
1992	chr3	133478602	133481376	2775	Distal Intergenic	133472342	133475206	2865	8419	ENST00000503047.1	BFSP2	6260
1993	chr3	2578324	2579126	803	Intron (ENST00000422330.5/152330, intron 3 of 4)	2571341	3057956	486616	152330	ENST00000427331.5	CNTN4	6983
1994	chr10	17179196	17180653	1458	Intron (ENST00000354631.7/1787, intron 1 of 11)	17159153	17174660	15508	1787	ENST00000436968.6	TRDMT1	-4536
1995	chr15	96251601	96255010	3410	Exon (ENST00000619812.1/ENST00000619812.1, exon 3 of 4)	96266529	96275996	9468	644192	ENST00000560395.5	NR2F2-AS1	20986
1996	chrX	14343245	14345946	2702	Distal Intergenic	14244382	14244928	547	286480	ENST00000411687.1	UBE2E4P	98863
1997	chr13	103001795	103005309	3515	Distal Intergenic	103043998	103066846	22849	6555	ENST00000245312.4	SLC10A2	61537
1998	chr15	78993377	78998494	5118	Promoter (<=1kb)	78980657	78998266	17610	5923	ENST00000560943.5	RASGRF1	0
[truncated: 31,578 more rows]
