# Supplementary material for: Generation of functional hepatocytes by forward programming with nuclear receptors
Source: eLife. 2022 Aug 12;11:e71591. doi: 10.7554/eLife.71591 (PMC9374437; doi:10.7554/eLife.71591)
Supplement: Figure 4—source data 1. [file elife-71591-fig4-data1.xlsx]

## Sheet: Sheet1
Figure 4D. mRNA expression levels in hESC derived FoP-Heps generated with 3TFs with or without nuclear cereptors													Statistical tests
			Day 20				Day 30			Controls			One-way ANOVA multiple corrections:	(Day 20)		(Day 30)
ALB	hiPSCs	3TFs	+RORc	+ERa	+AR	3TFs	+RORc	+ERa	+AR	HLCs	PHHs		Dunnett's multiple comparisons test	Summary	Adjusted P Value	Summary	Adjusted P Value
	0.0015623	4.79049	18.7297	97.1751	9.64741	64.1959	22.6498	8.52706	10.291	121.895	256.595		3TFs vs. +RORc	ns	0.5721	ns	0.9924
	0.00175064	47.4558	73.0997	43.0795	17.6157	26.3227	17.1067	26.6121	25.4525	128.444	262.153		3TFs vs. +ERa	ns	0.2289	ns	0.5571
	0.00058881	25.205	41.1732	49.1534	9.3846	28.2994	64.4296	24.0601	23.8916	70.5443	227.761		3TFs vs. +AR	ns	0.8692	ns	0.9529
	0.0006818	7.45166	25.0001	13.5173	7.15942	8.71599	34.489	11.0161	46.7007	67.1498	145.623
			Day 20				Day 30			Controls
SERPINA1	hiPSCs	3TFs	+RORc	+ERa	+AR	3TFs	+RORc	+ERa	+AR	HLCs	PHHs		Dunnett's multiple comparisons test	Summary	Adjusted P Value	Summary	Adjusted P Value
	0.0092255	45.4114	77.6186	269.431	109.74	227.316	127.441	144.056	51.31	277.722	95.0983		3TFs vs. +RORc	ns	0.8386	ns	0.953
	0.0109412	264.94	199.667	216.888	118.807	122.547	85.3036	219.985	99.1012	435.039	124.772		3TFs vs. +ERa	ns	0.5281	ns	0.9999
	0.00892321	145.039	100.741	208.764	131.652	173.689	400.554	117.528	94.3324	153.87	90.7025		3TFs vs. +AR	ns	0.9972	ns	0.9675
	0.00030381	75.7777	10.87	82.3225	138.267	160.814	188.984	183.713	336.447	185.505	28.6593
			Day 20				Day 30			Controls
AFP	hiPSCs	3TFs	+RORc	+ERa	+AR	3TFs	+RORc	+ERa	+AR	HLCs	PHHs		Dunnett's multiple comparisons test	Summary	Adjusted P Value	Summary	Adjusted P Value
	0.00127179	5.58753	42.2575	274.876	196.836	12.809	31.2962	9.94885	4.57295	251.254	0.004		3TFs vs. +RORc	ns	0.8729	ns	0.2049
	0.00151479	319.278	161.245	449.646	423.195	8.34898	36.4879	26.1462	7.18136	156.498	0.0036		3TFs vs. +ERa	ns	0.4177	ns	0.9785
	0.00137727	155.978	124.521	281.241	208.067	7.26794	16.9892	8.08413	27.2318	54.6834	0.005		3TFs vs. +AR	ns	0.7805	ns	0.3323
	0.00529844	188.586	136.555	118.84	101.305	6.1283	19.0514	2.11675	52.7591	33.8221	0.0014
Note: The hiPSCs, HLCs and PHHs datapoints are the same as Figure 1 and Figure 1-supplement 1 for comparison.
Figure 4E. Protein secretion levels in hESC derived FoP-Heps generated with 3TFs with or without nuclear receptors at day 20													Statistical tests
													One-way ANOVA multiple corrections:
Albumin	3TFs	+RORc	+ERa	+AR									Dunnett's multiple comparisons test	Summary	Adjusted P Value
ug/L/million	253.375	2414.94	426.01	100.895									3TFs vs. +RORc	ns	0.1047
	1627.41	4372.11	243.942	38.8903									3TFs vs. +ERa	ns	0.9979
	835.509	2038.85	864.402	128.069									3TFs vs. +AR	ns	0.5632
	1687	1486.51	2500.16	1216.65
Alpha-1 antitrypsin	3TFs	+RORc	+ERa	+AR									Dunnett's multiple comparisons test	Summary	Adjusted P Value
ng/ml/million	6940.34	9066.5	7567.72	8098.75									3TFs vs. +RORc	ns	0.3294
	6418.38	7222.12	5137.93	3557.53									3TFs vs. +ERa	ns	0.7147
	9741.55	4287.07	5404.07	6703.46									3TFs vs. +AR	ns	0.7771
	18714	2678.6	13038.2	13987.9
Alpha-Fetoprotein	3TFs	+RORc	+ERa	+AR									Dunnett's multiple comparisons test	Summary	Adjusted P Value
U/ml/million	3798	8233.25	7655.98	7548.82									3TFs vs. +RORc	ns	0.6498
	15717.1	8339.5	5350.34	2216.59									3TFs vs. +ERa	ns	0.995
	15580.7	3391.38	11971.3	5018.59									3TFs vs. +AR	ns	0.9604
	8014	5418.83	21548.9	21269.5
Figure 4F. CYP3A4 activity levels in hESC derived FoP-Heps generated with 3TFs with or without nuclear receptors
	Day 20				Day 30			Controls
RLU/ml/million	3TFs	+RORc	+ERα	+AR	+RORc	+ERα	+AR	HLCs	PHHs				Dunnett's multiple comparisons test	Summary	Adjusted P Value
	48479	806524	792321	270719	566461	258952	64654	31007.8	31858954				3TFs vs. +RORc	**	0.0072
	237359	284904	384535	626621	213678	466762	80127.6	19709.3	26392379				3TFs vs. +ERα	ns	0.2393
	336017	549711	541170	349849	226975	125222	522417	125751	3813647				3TFs vs. +AR	ns	0.1581
	328819	607147	416933	710340	365720		69001	108692	5129301				3TFs vs. +RORc	ns	0.9607
		872283	194840	680856	287734		223833	279307					3TFs vs. +ERα	ns	0.9981
		793270	450444	303951	223598		79242.3	47814.9					3TFs vs. +AR	ns	0.982
Note: The 3TFs datapoints in Figure 4F are the same used in Figure 1J for comparison. The HLCs and PHHs datapoints are the same as Figure 1 for comparison.
Figure 4G. CYP3A4 fold induction levels in hESC derived FoP-Heps treated with 100nM of the ligands over untreated at day 20													Statistical tests
	3TFs		3TFs+RORc										Paired t test (3TFs):	(3TFs)	(3TFs+RORc)
Desmosterol	Ctrl	Treat	Ctrl	Treat									P value	0.6667	0.0655
	1	1.02	1	0.72									P value summary	ns	ns
	1	0.98	1	0.8									Significantly different (P < 0.05)?	No	No
	1	0.98	1	0.9									One- or two-tailed P value?	Two-tailed	Two-tailed
													t, df	t=0.5000, df=2	t=3.713, df=2
													Number of pairs	3	3
	3TFs		3TFs+ERa										Paired t test (3TFs):	(3TFs)	(3TFs+ERa)
B-estradiol	Ctrl	Treat	Ctrl	Treat									P value	0.2305	0.0155
	1	1.36	1	3.17									P value summary	ns	*
	1	0.98	1	2.4									Significantly different (P < 0.05)?	No	Yes
	1	1.23	1	2.74									One- or two-tailed P value?	Two-tailed	Two-tailed
													t, df	t=1.704, df=2	t=7.945, df=2
													Number of pairs	3	3
	3TFs		3TFs+AR										Paired t test (3TFs):		(3TFs+AR)
Testosterone	Ctrl	Treat	Ctrl	Treat									P value	0.4533	0.0347
	1	0.5	1	0.02									P value summary	ns	*
	1	1.12	1	0.4									Significantly different (P < 0.05)?	No	Yes
	1	0.88	1	0.45									One- or two-tailed P value?	Two-tailed	Two-tailed
													t, df	t=0.9234, df=2	t=5.229, df=2
													Number of pairs	3	3
Figure 4 - supplement 2F. mRNA expression levels in hiPSC derived FoP-Heps generated with 3TFs with or without RORc													Statistical tests
ALB		Day 20		Day 30		Controls							Unpaired t test (3TFs vs +RORc):	(Day 20)	(Day 30)
	hiPSCs	3TFs	+RORc	3TFs	+RORc	HLCs	PHHs						P value	0.0178	0.2777
	0.0015623	1.29082	13.4287	79.31	145.52	121.895	256.595						P value summary	*	ns
	0.00175064	1.57518	14.6281	61.13	107.12	128.444	262.153						Significantly different (P < 0.05)?	Yes	No
	0.00058881	5.04239	37.594	19.01	56.45	70.5443	227.761						One- or two-tailed P value?	Two-tailed	Two-tailed
	0.0006818	7.9043	32.5809	53.26	36.21	67.1498	145.623						t, df	t=3.237, df=6	t=1.194, df=6
SERPINA1		Day 20		Day 30		Controls							Unpaired t test (3TFs vs +RORc):	(Day 20)	(Day 30)
	hiPSCs	3TFs	+RORc	3TFs	+RORc	HLCs	PHHs						P value	0.0653	0.4272
	0.0092255	17.6599	312.905	138.44	233.72	277.722	95.0983						P value summary	ns	ns
	0.0109412	63.0756	157.349	179.08	175.81	435.039	124.772						Significantly different (P < 0.05)?	No	No
	0.00892321	80.2285	276.018	125.93	161.45	153.87	90.7025						One- or two-tailed P value?	Two-tailed	Two-tailed
	0.00030381	222.926	629.73	177.33	134.65	185.505	28.6593						t, df	t=2.251, df=6	t=0.8513, df=6
AFP		Day 20		Day 30		Controls
	hiPSCs	3TFs	+RORc	3TFs	+RORc	HLCs	PHHs						Unpaired t test (3TFs vs +RORc):	(Day 20)	(Day 30)
	0.00127179	33.9557	137.67	49.66	24.19	251.254	0.004						P value	0.0432	0.4161
	0.00151479	11.5259	36.7696	40.64	36.14	156.498	0.0036						P value summary	*	ns
	0.00137727	16.1944	109.009	10.95	26.62	54.6834	0.005						Significantly different (P < 0.05)?	Yes	No
	0.00529844	46.6914	67.3844	28.76	6.93	33.8221	0.0014						One- or two-tailed P value?	Two-tailed	Two-tailed
													t, df	t=2.556, df=6	t=0.8733, df=6
Note: The hiPSCs, HLCs and PHHs datapoints are the same as Figure 1 and Figure 1-supplement 1 for comparison.
Figure 4 - supplement G. Protein secretion levels in hiPSC derived FoP-Heps generated with 3TFs with or without RORc at day 20													Statistical tests
Albumin	3TFs	+RORc											Unpaired t test
ug/L/million	362	1428											P value	0.1587
	729	837											P value summary	ns
	368	549											Significantly different (P < 0.05)?	No
	704	735											One- or two-tailed P value?	Two-tailed
													t, df	t=1.609, df=6
Alpha-1 antitrypsin	3TFs	+RORc											Unpaired t test
ng/ml/million	16132	24009											P value	0.5757
	16634	9156											P value summary	ns
	10825	7932											Significantly different (P < 0.05)?	No
	14474	6949											One- or two-tailed P value?	Two-tailed
													t, df	t=0.5916, df=6
Alpha-Fetoprotein	3TFs	+RORc											Unpaired t test
U/ml/million	5875	21402											P value	0.9054
	14197	6873											P value summary	ns
	4675	3858											Significantly different (P < 0.05)?	No
	6807	1858											One- or two-tailed P value?	Two-tailed
													t, df	t=0.1239, df=6
Figure 4 - supplement 2H. CYP3A4 activity levels in hESC derived FoP-Heps generated with 3TFs with or without nuclear receptors													Statistical tests
		Day 20	Day 30	Controls									Dunnett's multiple comparisons test	Summary	Adjusted P Value
RLU/ml/million	3TFs	+RORc	+RORc	HLCs	PHHs								3TFs vs. +RORc(D20)	**	0.0048
	20046	565185	196139	31007.8	31858954								3TFs vs. +RORc(D30)	ns	0.053
	19869	459396	318088	19709.3	26392379
	17056	63892	342334	125751	3813647
	151044	469777		108692	5129301
	68772	266514		279307
	72729	231634		47814.9
Note: The HLCs and PHHs datapoints are the same as Figure 1 for comparison.
