# Supplementary material for: Generation of functional hepatocytes by forward programming with nuclear receptors
Source: eLife. 2022 Aug 12;11:e71591. doi: 10.7554/eLife.71591 (PMC9374437; doi:10.7554/eLife.71591)
Supplement: Figure 5—source data 1. [file elife-71591-fig5-data1.xlsx]

## Sheet: Sheet1
Figure 5A. CYP3A4 activity levels in hESC and hiPSC derived FoP-Heps generated with 4TFs, HLCs and PHHs											Statistical tests
RLU/ml/million	eFoP		iFoP		Controls						Dunnett's multiple comparisons test	Summary	Adjusted P Value
	D20	D30	D20	D30	HLCs	PHHs					HLCs vs. D20	****	<0.0001
	806524	566461	565185	196139	31007.8	31858954					HLCs vs. D30	ns	0.1032
	284904	213678	459396	318088	19709.3	26392379					HLCs vs. D20	ns	0.055
	549711	226975	63892	342334	125751	3813647					HLCs vs. D30	ns	0.3372
	607147	365720	469777		108692	5129301					PHHs not included in the test
	872283	287734	266514		279307
	793270	223598	231634		47814.9
Note: The FoP-Heps datapoints from Figure 4 and the HLC and PHH datapoints from Figure 1 where combined for comparison.
Figure 5B. mRNA expression levels in hESC and hiPSC derived FoP-Heps generated with 4TFs, HLCs and PHHs											Statistical tests
											One-way ANOVA multiple corrections:
		eFoP		iFoP		Controls					Dunnett's multiple comparisons test	Summary	Adjusted P Value
CYP3A4	hiPSCs	D20	D30	D20	D30	HLCs	PHHs				HLCs vs. hiPSCs	ns	0.9999
	0.00034327	0.00363187	0.00678466	0.00164155	0.0047	0.00656214	0.284186				HLCs vs. D20	ns	0.9998
	0.00091267	0.00882841	0.0120775	0.00014498	0.0058	0.00396372	0.459512				HLCs vs. D30	ns	0.9998
	0.00035979	0.0170072	0.0188047	0.00329158	0.0037	0.0104649	0.716238				HLCs vs. D20	ns	0.9999
	0.00417785	0.0212867	0.0153257	0.00341305	0.0041	0.00363187	0.30656				HLCs vs. D30	ns	>0.9999
											HLCs vs. PHHs	****	<0.0001
		eFoP		iFoP		Controls					Dunnett's multiple comparisons test:	Summary	Adjusted P Value
CYP2A6	hiPSCs	D20	D30	D20	D30	HLCs	PHHs				HLCs vs. hiPSCs	ns	0.9999
	0.00022509	0.00308404	0.0197764	0.0129364	0.0861	0.00636339	0.235489				HLCs vs. D20	ns	0.9966
	0.00054614	0.0525734	0.108234	0.00410135	0.0201	0.00430364	0.403436				HLCs vs. D30	ns	0.9133
	0.00035834	0.043774	0.0391077	0.0268577	0.0201	0.0107859	0.426259				HLCs vs. D20	ns	0.9998
	0.00212165	0.00972864	0.031301	0.0126534	0.0229	0.00308404	0.697317				HLCs vs. D30	ns	0.9796
											HLCs vs. PHHs	****	<0.0001
		eFoP		iFoP		Controls					Dunnett's multiple comparisons test:	Summary	Adjusted P Value
CYP2C8	hiPSCs	D20	D30	D20	D30	HLCs	PHHs				HLCs vs. hiPSCs	ns	0.9997
	0.00165818	0.0141984	0.0289046	0.00813885	0.00634046	0.0031734	0.687658				HLCs vs. D20	ns	0.9998
	0.00313209	0.0253923	0.00847737	0.0187027	0.0229522	0.00457985	0.493449				HLCs vs. D30	ns	0.9997
	0.00034764	0.0152767	0.0202523	0.0326364	0.0179433	0.00773394	0.702288				HLCs vs. D20	ns	0.9996
	0.00076767	0.01397	0.0265423	0.0288932	0.0174263	0.0296889	0.362581				HLCs vs. D30	ns	0.9999
											HLCs vs. PHHs	****	<0.0001
		eFoP		iFoP		Controls					Dunnett's multiple comparisons test:	Summary	Adjusted P Value
CYP2C9	hiPSCs	D20	D30	D20	D30	HLCs	PHHs				HLCs vs. hiPSCs	ns	0.9999
	2.1399e-05	0.00090963	0.022585	0.00499305	0.0248532	0.0002248	1.10974				HLCs vs. D20	ns	0.9684
	6.3437e-05	0.0681285	0.17135	0.010023	0.0358335	0.00458155	0.857527				HLCs vs. D30	ns	0.4788
	0	0.0162198	0.0589958	0.0612132	0.0240757	0.0123574	0.788789				HLCs vs. D20	ns	0.9981
	0.00133482	0.0685695	0.085147	0.0144767	0.00425122	0.00090963	0.682198				HLCs vs. D30	ns	0.9982
											HLCs vs. PHHs	****	<0.0001
		eFoP		iFoP		Controls					Dunnett's multiple comparisons test:	Summary	Adjusted P Value
UGT1A6	hiPSCs	D20	D30	D20	D30	HLCs	PHHs				HLCs vs. hiPSCs	ns	0.5664
	0.00014123	0.66495	0.529768	0.0838244	0.367854	0.178089	1.69237				HLCs vs. D20	ns	0.9849
	0.00035576	0.84829	2.94689	0.0497019	0.356671	0.804879	2.29233				HLCs vs. D30	ns	0.2365
	0.00017674	0.333768	0.309444	0.114346	0.212638	0.292086	1.71955				HLCs vs. D20	ns	0.8497
	0.00019456	1.22984	1.56709	0.445072	0.244361	0.926304	0.666946				HLCs vs. D30	ns	0.9689
											HLCs vs. PHHs	ns	0.0716
Note: The hiPSCs, HLCs and PHHs datapoints are the same as Figure 1 and Figure 1-supplement 1 for comparison.
Figure 5C. mRNA expression levels in hESC and hiPSC derived FoP-Heps generated with 4TFs, HLCs and PHHs											Statistical tests
											One-way ANOVA multiple corrections:
		eFoP		iFoP		Controls					Dunnett's multiple comparisons test:	Summary	Adjusted P Value
ALB	hiPSCs	D20	D30	D20	D30	HLCs	PHHs				HLCs vs. hiPSCs	**	0.0023
	0.0015623	18.7297	22.6498	13.4287	145.52	121.895	256.595				HLCs vs. D20	ns	0.0958
	0.00175064	73.0997	17.1067	14.6281	107.12	128.444	262.153				HLCs vs. D30	ns	0.0632
	0.00058881	41.1732	64.4296	37.594	56.45	70.5443	227.761				HLCs vs. D20	*	0.0251
	0.0006818	25.0001	34.489	32.5809	36.21	67.1498	145.623				HLCs vs. D30	ns	0.9939
											HLCs vs. PHHs	***	0.0001
		eFoP		iFoP		Controls					Dunnett's multiple comparisons test:	Summary	Adjusted P Value
G6PC	hiPSCs	D20	D30	D20	D30	HLCs	PHHs				HLCs vs. hiPSCs	ns	0.9589
	0.00672891	1.39063	0.976984	0.806217	4.5308	0.0910575	1.23372				HLCs vs. D20	ns	0.3889
	0.00275841	1.64086	4.21707	0.372489	3.3471	0.0684509	0.185867				HLCs vs. D30	**	0.0066
	0.00177825	1.39074	2.74582	1.40504	1.1803	1.26636	0.186107				HLCs vs. D20	ns	0.937
	0.001386	1.24712	2.66261	0.889652	1.4854	0.23135	0.0657862				HLCs vs. D30	**	0.007
											HLCs vs. PHHs	ns	>0.9999
		eFoP		iFoP		Controls					Dunnett's multiple comparisons test:	Summary	Adjusted P Value
PCK1	hiPSCs	D20	D30	D20	D30	HLCs	PHHs				HLCs vs. hiPSCs	ns	0.9878
	0.00916607	0.298636	0.123357	0.0270499	0.2583	0.203831	0.569689				HLCs vs. D20	ns	0.9998
	0.00601236	0.205469	0.982589	0.0297043	0.1424	0.0431256	1.61903				HLCs vs. D30	ns	0.4625
	0.00257309	0.111308	0.334422	0.0918366	0.0728	0.192026	1.72788				HLCs vs. D20	ns	0.9996
	0.0011782	0.0660739	0.56994	0.141026	0.0638	0.0879709	0.0777276				HLCs vs. D30	ns	>0.9999
											HLCs vs. PHHs	**	0.0085
		eFoP		iFoP		Controls					Dunnett's multiple comparisons test:	Summary	Adjusted P Value
PPARy	hiPSCs	D20	D30	D20	D30	HLCs	PHHs				HLCs vs. hiPSCs	*	0.0365
	0.00026	0.156847	0.245924	0.0907283	0.282993	0.277816	0.0794309				HLCs vs. D20	ns	0.9879
	0.00051892	0.0834844	0.43357	0.15576	0.143073	0.109882	0.0676968				HLCs vs. D30	*	0.03
	0.00049837	0.102082	0.179886	0.110573	0.277003	0.0684444	0.0221355				HLCs vs. D20	ns	0.9999
	0.00342317	0.107812	0.24774	0.208052	0.23124	0.0912906	0.020443				HLCs vs. D30	ns	0.1929
											HLCs vs. PHHs	ns	0.2529
Note: The hiPSCs, HLCs and PHHs datapoints are the same as Figure 1 and Figure 1-supplement 1 for comparison.
Figure 5 - figure supplement 1A. mRNA expression levels in hESC and hiPSC derived FoP-Heps generated with 4TFs, HLCs and PHHs											Statistical tests
											One-way ANOVA multiple corrections:
		eFoP		iFoP		Controls					Dunnett's multiple comparisons test	Summary	Adjusted P Value
UGT1A1	hiPSCs	D20	D30	D20	D30	HLCs	PHHs				HLCs vs. hiPSCs	***	0.0002
	0.00010584	0.0806005	0.0527729	0.00749272	0.110494	5.82582	0.809585				HLCs vs. D20	***	0.0003
	0.00081604	0.021966	0.0276329	0.0107544	0.0598421	3.44261	1.43344				HLCs vs. D30	***	0.0003
	0.00044052	0.0537383	0.0764386	0.00868874	0.0616692	0.811432	0.250782				HLCs vs. D20	***	0.0002
	0.00043276	0.0260578	0.00027832	0.0410525	0.0501241	2.17367	0.210892				HLCs vs. D30	***	0.0003
											HLCs vs. PHHs	**	0.003
APOA1		eFoP		iFoP		Controls					Dunnett's multiple comparisons test	Summary	Adjusted P Value
	hiPSCs	D20	D30	D20	D30	HLCs	PHHs				HLCs vs. hiPSCs	*	0.0367
	1.4103e-05	4.1408	1.54086	2.66996	1.83767	8.09613	0.236359				HLCs vs. D20	ns	0.9997
	0.00012553	16.4054	3.30643	3.23297	1.90061	7.22309	0.110605				HLCs vs. D30	ns	0.1325
	9.3613e-05	6.17819	0.504542	19.2399	0.47608	14.2471	0.295007				HLCs vs. D20	ns	0.9997
	5.414e-05	4.75936	1.90836	5.87644	1.41411	3.94749	0.100124				HLCs vs. D30	ns	0.1007
											HLCs vs. PHHs	*	0.0421
FASN		eFoP		iFoP		Controls					Dunnett's multiple comparisons test	Summary	Adjusted P Value
	hiPSCs	D20	D30	D20	D30	HLCs	PHHs				HLCs vs. hiPSCs	ns	0.1545
	0.162091	2.15074	0.753139	1.02734	4.90663	5.59114	1.03918				HLCs vs. D20	ns	0.5565
	0.282083	1.74363	1.08343	1.51564	1.79957	0.589246	0.836307				HLCs vs. D30	ns	0.2571
	0.341342	0.749846	0.634924	2.76909	3.59818	2.17864	0.188737				HLCs vs. D20	ns	0.9999
	1.46129	0.385604	0.75962	4.12384	2.26561	1.38662	0.211595				HLCs vs. D30	ns	0.9045
											HLCs vs. PHHs	ns	0.1569
		eFoP		iFoP		Controls					Dunnett's multiple comparisons test:	Summary	Adjusted P Value
PPARa	hiPSCs	D20	D30	D20	D30	HLCs	PHHs				HLCs vs. hiPSCs	**	0.0075
	0.015217	0.354595	0.400563	0.123771	0.394761	0.325732	0.290192				HLCs vs. D20	ns	0.9142
	0.0222829	0.673282	0.745302	0.188863	0.152654	0.402596	0.562799				HLCs vs. D30	ns	0.8096
	0.031712	0.692279	0.434855	0.247782	0.322386	0.511611	0.45105				HLCs vs. D20	ns	0.3643
	0.0591412	0.264628	0.488446	0.376293	0.137068	0.40674	0.0721333				HLCs vs. D30	ns	0.4631
											HLCs vs. PHHs	ns	0.9666
		eFoP		iFoP		Controls					Dunnett's multiple comparisons test	Summary	Adjusted P Value
NR1H4	hiPSCs	D20	D30	D20	D30	HLCs	PHHs				HLCs vs. hiPSCs	ns	0.9401
	0.00016305	0.0924534	0.223331	0.113462	0.240136	0.0467529	0.363477				HLCs vs. D20	ns	>0.9999
	0.00020962	0.179893	0.220179	0.210849	0.503382	0.0308502	1.1032				HLCs vs. D30	ns	0.8647
	0.00021778	0.11462	0.116906	0.108019	0.354973	0.238194	0.218099				HLCs vs. D20	ns	0.848
	0.00192414	0.0679884	0.384538	0.530324	0.349324	0.108447	0.0851616				HLCs vs. D30	ns	0.3133
											HLCs vs. PHHs	ns	0.1156
Note: The hiPSCs, HLCs and PHHs datapoints are the same as Figure 1 and Figure 1-supplement 1 for comparison.
Figure 5 - figure supplement 1B. 4TF mRNA expression levels in hESC and hiPSC derived FoP-Heps generated with 4TFs, HLCs and PHHs
		eFoP		iFoP		Controls					Dunnett's multiple comparisons test	Summary	Adjusted P Value
HNF1A	hiPSCs	D20	D30	D20	D30	HLCs	PHHs				HLCs vs. hiPSCs	ns	0.9997
	6e-05	0.085	0.126	0.053	0.21	0.0284268	0.0422				HLCs vs. D20	**	0.0042
	8e-05	0.703	0.85	0.143	0.198	0.0784129	0.0558				HLCs vs. D30	*	0.0284
	0.00026	0.885	0.252	0.198	0.081	0.0209991	0.0354				HLCs vs. D20	ns	0.8333
	0.00088	0.906	0.823	0.358	0.511	0.0151019	0.0093				HLCs vs. D30	ns	0.5718
											HLCs vs. PHHs	ns	>0.9999
		eFoP		iFoP		Controls					Dunnett's multiple comparisons test	Summary	Adjusted P Value
FOXA3	hiPSCs	D20	D30	D20	D30	HLCs	PHHs				HLCs vs. hiPSCs	ns	0.9996
	0.01759	0.163	0.255	0.211	0.354	0.216832	0.2215				HLCs vs. D20	ns	0.5566
	0.03799	0.464	3.386	0.458	0.144	0.363827	0.121				HLCs vs. D30	ns	0.0874
	0.03408	1.843	0.718	0.517	0.332	0.184018	0.0444				HLCs vs. D20	ns	0.9938
	0.0907	1.417	1.975	0.664	2.727	0.0804764	0.0149				HLCs vs. D30	ns	0.6601
											HLCs vs. PHHs	ns	0.9997
		eFoP		iFoP		Controls					Dunnett's multiple comparisons test	Summary	Adjusted P Value
HNF6	hiPSCs	D20	D30	D20	D30	HLCs	PHHs				HLCs vs. hiPSCs	ns	0.9996
	0.0001	0.043	0.065	0.033	0.115	0.0389806	0.0451				HLCs vs. D20	ns	0.6345
	0.00137	0.122	0.926	0.106	0.056	0.112197	0.026				HLCs vs. D30	ns	0.0965
	0.00062	0.461	0.222	0.139	0.087	0.0209285	0.0625				HLCs vs. D20	ns	0.996
	0.00907	0.311	0.421	0.147	0.782	0.0117122	0.0082				HLCs vs. D30	ns	0.5159
											HLCs vs. PHHs	ns	>0.9999
		eFoP		iFoP		Controls					Dunnett's multiple comparisons test:	Summary	Adjusted P Value
RORy	hiPSCs	D20	D30	D20	D30	HLCs	PHHs				HLCs vs. hiPSCs	ns	>0.9999
	0.00055074	0.287509	0.00289173	0.125246	0.234521	0.00090386	0.0371731				HLCs vs. D20	*	0.0397
	0.00065645	0.65306	2.65157	0.297513	0.344511	0.00083327	0.418207				HLCs vs. D30	*	0.0371
	0.00035877	1.55392	0.504916	0.122122	0.196087	0.010611	0.231091				HLCs vs. D20	ns	0.9338
	0.00251792	2.4079	1.79569	0.752488	0.273722	0.00088926	0.030711				HLCs vs. D30	ns	0.9742
											HLCs vs. PHHs	ns	0.9957
Note: The hiPSCs, HLCs and PHHs datapoints are the same as Figure 1-supplement 1 for comparison.
