# Supplementary material for: Generation of functional hepatocytes by forward programming with nuclear receptors
Source: eLife. 2022 Aug 12;11:e71591. doi: 10.7554/eLife.71591 (PMC9374437; doi:10.7554/eLife.71591)
Supplement: Figure 6—source data 1. [file elife-71591-fig6-data1.xlsx]

## Sheet: Sheet1
Figure 6B. mRNA expression levels in hESC and hiPSC derived FoP-Heps generated with 4TFs cultured in 3D											Statistical tests
		eFoP 2D		eFoP 3D		iFoP 2D		iFoP 3D			Unpaired t test	(eFoP D20 2D vs 3D)	(eFoP D30 2D vs 3D)	(iFoP D20 2D vs 3D)	(iFoP D30 2D vs 3D)
SERPINA1	hiPSCs	D20	D30	D20	D30	D20	D30	D20	D30		P value	0.0178	0.0049	0.1175	0.0122
	0.0092255	77.6186	127.441	798.823	500.819	312.905	233.72	442.008	1222.48		P value summary	*	**	ns	*
	0.0109412	199.667	85.3036	256.217	780.187	157.349	175.81	587.32	1187.86		Significantly different (P < 0.05)?	Yes	Yes	No	Yes
	0.00892321	100.741	400.554	380.153	778.16	276.018	161.45	632.497	507.263		One- or two-tailed P value?	Two-tailed	Two-tailed	Two-tailed	Two-tailed
	0.00030381	10.87	188.984	717.38	1059.74	629.73	134.65	512.304	559.181		t, df	t=3.235, df=6	t=4.327, df=6	t=1.827, df=6	t=3.543, df=6
ALB		eFoP 2D		eFoP 3D		iFoP 2D		iFoP 3D			Unpaired t test:	(eFoP D20 2D vs 3D)	(eFoP D30 2D vs 3D)	(iFoP D20 2D vs 3D)	(iFoP D30 2D vs 3D)
	hiPSCs	D20	D30	D20	D30	D20	D30	D20	D30		P value	0.097	0.7184	0.4486	0.7431
	0.0015623	18.7297	22.6498	28.3106	9.011	13.4287	145.52	4.84356	54.0491		P value summary	ns	ns	ns	ns
	0.00175064	73.0997	17.1067	8.11082	26.822	14.6281	107.12	33.7418	113.529		Significantly different (P < 0.05)?	No	No	No	No
	0.00058881	41.1732	64.4296	10.6827	39.915	37.594	56.45	19.4307	103.941		One- or two-tailed P value?	Two-tailed	Two-tailed	Two-tailed	Two-tailed
	0.0006818	25.0001	34.489	7.86897	43.119	32.5809	36.21	11.8894	112.942		t, df	t=1.965, df=6	t=0.3780, df=6	t=0.8106, df=6	t=0.3433, df=6
AFP		eFoP 2D		eFoP 3D		iFoP 2D		iFoP 3D			Unpaired t test:	(eFoP D20 2D vs 3D)	(eFoP D30 2D vs 3D)	(iFoP D20 2D vs 3D)	(iFoP D30 2D vs 3D)
	hiPSCs	D20	D30	D20	D30	D20	D30	D20	D30		P value	0.078	0.6976	0.9175	0.0217
	0.00127179	42.2575	31.2962	96.8079	22.918	137.67	24.19	16.8138	33.784		P value summary	ns	ns	ns	*
	0.00151479	161.245	36.4879	42.035	18.071	36.7696	36.14	183.224	50.9875		Significantly different (P < 0.05)?	No	No	No	Yes
	0.00137727	124.521	16.9892	26.0168	26.197	109.009	26.62	117.874	70.6251		One- or two-tailed P value?	Two-tailed	Two-tailed	Two-tailed	Two-tailed
	0.00529844	136.555	19.0514	44.8796	50.819	67.3844	6.93	51.5149	61.2286		t, df	t=2.122, df=6	t=0.4078, df=6	t=0.1080, df=6	t=3.080, df=6
		eFoP 2D		eFoP 3D		iFoP 2D		iFoP 3D			Unpaired t test	(eFoP D20 2D vs 3D)	(eFoP D30 2D vs 3D)	(iFoP D20 2D vs 3D)	(iFoP D30 2D vs 3D)
UGT1A6	hiPSCs	D20	D30	D20	D30	D20	D30	D20	D30		P value	0.0167	0.0775	0.0055	0.0058
	0.00014123	0.66495	0.529768	2.18241	1.423	0.0838244	0.367854	1.48415	1.05525		P value summary	*	ns	**	**
	0.00035576	0.84829	2.94689	1.13008	4.949	0.0497019	0.356671	1.01078	2.88315		Significantly different (P < 0.05)?	Yes	No	Yes	Yes
	0.00017674	0.333768	0.309444	2.0115	3.145	0.114346	0.212638	1.16958	1.68607		One- or two-tailed P value?	Two-tailed	Two-tailed	Two-tailed	Two-tailed
	0.00019456	1.22984	1.56709	2.70109	4.029	0.445072	0.244361	2.36288	1.93517		t, df	t=3.286, df=6	t=2.128, df=6	t=4.228, df=6	t=4.181, df=6
G6PC		eFoP 2D		eFoP 3D		iFoP 2D		iFoP 3D			Unpaired t test:	(eFoP D20 2D vs 3D)	(eFoP D30 2D vs 3D)	(iFoP D20 2D vs 3D)	(iFoP D30 2D vs 3D)
	hiPSCs	D20	D30	D20	D30	D20	D30	D20	D30		P value	<0.0001	0.0091	0.0087	0.0183
	0.00672891	1.39063	0.976984	0.0412152	0.105	0.806217	4.5308	0.0521761	0.0385643		P value summary	****	**	**	*
	0.00275841	1.64086	4.21707	0.142241	0.119	0.372489	3.3471	0.0871767	0.0813643		Significantly different (P < 0.05)?	Yes	Yes	Yes	Yes
	0.00177825	1.39074	2.74582	0.0672765	0.134	1.40504	1.1803	0.0542564	0.134827		One- or two-tailed P value?	Two-tailed	Two-tailed	Two-tailed	Two-tailed
	0.001386	1.24712	2.66261	0.0963628	0.214	0.889652	1.4854	0.0368786	0.105294		t, df	t=15.72, df=6	t=3.784, df=6	t=3.823, df=6	t=3.211, df=6
APOA1		eFoP 2D		eFoP 3D		iFoP 2D		iFoP 3D			Unpaired t test:	(eFoP D20 2D vs 3D)	(eFoP D30 2D vs 3D)	(iFoP D20 2D vs 3D)	(iFoP D30 2D vs 3D)
	hiPSCs	D20	D30	D20	D30	D20	D30	D20	D30		P value	0.3945	0.02	0.6886	0.0668
	1.4103e-05	4.1408	1.54086	7.53135	3.404	2.66996	1.83767	1.18034	1.06865		P value summary	ns	*	ns	ns
	0.00012553	16.4054	3.30643	4.92719	7.412	3.23297	1.90061	11.0457	4.31115		Significantly different (P < 0.05)?	No	Yes	No	No
	9.3613e-05	6.17819	0.504542	2.5465	6.356	19.2399	0.47608	8.41493	9.7174		One- or two-tailed P value?	Two-tailed	Two-tailed	Two-tailed	Two-tailed
	5.414e-05	4.75936	1.90836	5.28258	10.927	5.87644	1.41411	2.74684	8.6287		t, df	t=0.9171, df=6	t=3.143, df=6	t=0.4207, df=6	t=2.235, df=6
Note: The same hiPSC datapoints from Figure 2 - figure supplement 1 were used for comparison.
Note: The same eFoP and iFoP 2D datapoints from Figure 5 and Figure 5 - supplement 1 were used for comparison.
Figure 6D. Viability in FoP-Heps treated with fatty acids relative to untreated											Statistical tests
	Ctr		OA		PA						Paired t test	(eFoP Ctr vs OA)	(eFoP Ctr vs PA)	(iFoP Ctr vs OA)	(iFoP Ctr vs PA)
	eFoP	iFoP	eFoP	iFoP	eFoP	iFoP					P value	0.3118	0.3093	0.3228	0.0073
	1	1	0.87	0.85	0.82	0.28					P value summary	ns	ns	ns	**
	1	1	1.17	3.41	0.41	0.36					Significantly different (P < 0.05)?	No	No	No	Yes
	1	1	1.11	1.55	1.17	0.35					One- or two-tailed P value?	Two-tailed	Two-tailed	Two-tailed	Two-tailed
	1	1	1.24	0.98	0.84	0.68					t, df	t=1.213, df=3	t=1.221, df=3	t=1.181, df=3	t=6.524, df=3
											Number of pairs	4	4	4	4
Figure 6E. Viability in FoP-Heps treated with acetaminophen relative to untreated											Statistical tests
	Ctr		APAP								Paired t test	eFoP Ctr vs APAP)	iFoP Ctr vs APAP)
	eFoP	iFoP	eFoP	iFoP							P value	0.0081	0.0124
	1	1	0.32	0.62872							P value summary	**	*
	1	1	0.14	0.527238							Significantly different (P < 0.05)?	Yes	Yes
	1	1	0.57	0.651177							One- or two-tailed P value?	Two-tailed	Two-tailed
	1	1	0.51	0.262202							t, df	t=6.307, df=3	t=5.410, df=3
											Number of pairs	4	4
